# Supplementary material for: A matter of background: DNA repair pathways as a possible cause for the sparse distribution of CRISPR-Cas systems in bacteria
Source: Philos Trans R Soc Lond B Biol Sci. 2019 Mar 25;374(1772):20180088. doi: 10.1098/rstb.2018.0088 (PMC6452273; doi:10.1098/rstb.2018.0088)
Supplement: Supplementary Table 1 [file rstb20180088supp2.xls]

## Sheet: Sheet1
name	Kingdom	phylum1	phylum2	TypeIA	TypeIB	TypeIC	TypeID	TypeIE	TypeIF	TypeIIA	TypeIIB	TypeIIC	TypeIIIA	TypeIIIB	TypeIIIC	TypeIIID	TypeIU	TypeIV	TypeV	TypeVI	NHEJ	RecA	RecF	RecFOR	RecG	RecJ	RecOR	RecQS	RecX	SbcB	SbcCD	SbcEF	lexA	RecU	RecN	RuvC	RuvAB	AddAB	AdnAB	RecBCD
Propionibacterium acidipropionici ATCC 4875	Bacteria	Actinobacteria	Propionibacteriales	0	0	0	0	1	0	0	0	0	0	0	0	0	0	0	0	0	0	1	0	0	1	0	1	0	1	0	0	0	0	0	1	1	1	0	1	1
Propionibacterium acidipropionici strain CGMCC 1.2230	Bacteria	Actinobacteria	Propionibacteriales	0	0	0	0	0	0	0	0	0	0	0	0	0	0	0	0	0	0	1	1	0	1	0	1	0	1	0	0	0	0	0	1	1	1	0	1	1
Propionibacterium acidipropionici strain ATCC 55737	Bacteria	Actinobacteria	Propionibacteriales	0	0	0	0	0	0	0	0	0	0	0	0	0	1	0	0	0	0	1	1	0	1	0	1	0	1	0	0	0	1	0	1	1	1	0	1	1
Propionibacterium acidipropionici strain F3E8	Bacteria	Actinobacteria	Propionibacteriales	0	0	0	0	0	0	0	0	0	0	0	0	0	1	0	0	0	0	1	1	0	1	0	1	0	1	0	0	0	0	0	1	1	1	0	1	1
Acetohalobium arabaticum DSM 5501	Bacteria	Firmicutes	Clostridia	0	0	0	1	0	0	0	0	0	0	0	0	0	0	0	0	0	0	1	1	0	1	1	1	1	0	0	0	0	1	1	1	0	1	0	0	0
Acidovorax avenae subsp. avenae ATCC 19860	Bacteria	Proteobacteria	Betaproteobacteria	0	0	1	0	0	0	0	0	0	0	0	0	0	0	0	0	0	1	1	0	0	1	1	1	1	1	1	1	0	1	0	1	1	1	0	0	0
Actinobacteria bacterium IMCC26256	Bacteria	Actinobacteria		0	0	0	0	0	0	0	0	0	0	0	0	0	0	0	0	0	0	0	1	0	1	0	1	0	0	0	1	0	1	0	1	1	1	0	0	1
Acinetobacter baumannii ACICU	Bacteria	Proteobacteria	Gammaproteobacteria	0	0	0	0	0	0	0	0	0	0	0	0	0	0	0	0	0	0	1	1	0	1	1	1	0	1	0	1	0	1	0	1	1	1	0	0	1
Acinetobacter baumannii AB307-0294	Bacteria	Proteobacteria	Gammaproteobacteria	0	0	0	0	0	1	0	0	0	0	0	0	0	0	0	0	0	0	1	1	0	1	1	1	0	1	0	1	0	1	0	1	1	1	0	0	1
Acinetobacter baumannii AB0057	Bacteria	Proteobacteria	Gammaproteobacteria	0	0	0	0	0	1	0	0	0	0	0	0	0	0	0	0	0	0	1	1	0	1	1	1	0	1	0	1	0	1	0	1	1	1	0	0	1
Acinetobacter baumannii str. AYE	Bacteria	Proteobacteria	Gammaproteobacteria	0	0	0	0	0	1	0	0	0	0	0	0	0	0	0	0	0	0	1	1	0	1	1	1	0	1	0	1	0	1	0	1	1	1	0	0	1
Acinetobacter baumannii D1279779	Bacteria	Proteobacteria	Gammaproteobacteria	0	0	0	0	0	0	0	0	0	0	0	0	0	0	0	0	0	0	1	1	0	1	1	1	0	1	0	1	0	1	0	1	1	1	0	0	1
Acinetobacter baumannii MDR-TJ	Bacteria	Proteobacteria	Gammaproteobacteria	0	0	0	0	0	0	0	0	0	0	0	0	0	0	0	0	0	0	1	1	0	1	1	1	0	1	0	1	0	1	0	1	1	1	0	0	1
Acinetobacter baumannii 1656-2	Bacteria	Proteobacteria	Gammaproteobacteria	0	0	0	0	0	0	0	0	0	0	0	0	0	0	0	0	0	0	1	1	0	1	1	1	0	1	0	1	0	1	0	1	1	1	0	0	1
Acinetobacter baumannii MDR-ZJ06	Bacteria	Proteobacteria	Gammaproteobacteria	0	0	0	0	0	0	0	0	0	0	0	0	0	0	0	0	0	0	1	1	0	1	1	1	0	1	0	1	0	1	0	1	1	1	0	0	1
Acinetobacter baumannii TYTH-1	Bacteria	Proteobacteria	Gammaproteobacteria	0	0	0	0	0	0	0	0	0	0	0	0	0	0	0	0	0	0	1	1	0	1	1	1	0	1	0	1	0	1	0	1	1	1	0	0	1
Acinetobacter baumannii BJAB07104	Bacteria	Proteobacteria	Gammaproteobacteria	0	0	0	0	0	0	0	0	0	0	0	0	0	0	0	0	0	0	1	1	0	1	1	1	0	1	0	1	0	1	0	1	1	1	0	0	1
Acinetobacter baumannii BJAB0715	Bacteria	Proteobacteria	Gammaproteobacteria	0	0	0	0	0	0	0	0	0	0	0	0	0	0	0	0	0	0	1	1	0	1	1	1	0	1	0	1	0	1	0	1	1	1	0	0	1
Acinetobacter baumannii BJAB0868	Bacteria	Proteobacteria	Gammaproteobacteria	0	0	0	0	0	0	0	0	0	0	0	0	0	0	0	0	0	0	1	1	0	1	1	1	0	1	0	1	0	1	0	1	1	1	0	0	1
Acinetobacter baumannii DU202	Bacteria	Proteobacteria	Gammaproteobacteria	0	0	0	0	0	0	0	0	0	0	0	0	0	0	0	0	0	0	1	1	0	1	1	1	0	1	0	1	0	1	0	1	1	1	0	0	1
Acinetobacter baumannii ZW85-1	Bacteria	Proteobacteria	Gammaproteobacteria	0	0	0	0	0	0	0	0	0	0	0	0	0	0	0	0	0	0	1	1	0	1	1	1	0	1	0	1	0	1	0	1	1	1	0	0	1
Acinetobacter baumannii strain AC29	Bacteria	Proteobacteria	Gammaproteobacteria	0	0	0	0	0	0	0	0	0	0	0	0	0	0	0	0	0	0	1	1	0	1	1	1	0	1	0	1	0	1	0	1	1	1	0	0	1
Acinetobacter baumannii strain AB031	Bacteria	Proteobacteria	Gammaproteobacteria	0	0	0	0	0	0	0	0	0	0	0	0	0	0	0	0	0	0	1	1	0	1	1	1	0	1	0	1	0	1	0	1	1	1	0	0	1
Acinetobacter baumannii strain AB030	Bacteria	Proteobacteria	Gammaproteobacteria	0	0	0	0	0	0	0	0	0	0	0	0	0	0	0	0	0	0	1	1	0	1	1	1	0	1	0	1	0	1	0	1	1	1	0	0	1
Acinetobacter baumannii strain AbH12O-A2	Bacteria	Proteobacteria	Gammaproteobacteria	0	0	0	0	0	1	0	0	0	0	0	0	0	0	0	0	0	0	1	1	0	1	1	1	0	1	0	1	0	1	0	1	1	1	0	0	1
Acinetobacter baumannii LAC-4	Bacteria	Proteobacteria	Gammaproteobacteria	0	0	0	0	0	0	0	0	0	0	0	0	0	0	0	0	0	0	1	1	0	1	1	1	0	1	0	1	0	1	0	1	1	1	0	0	1
Acinetobacter baumannii strain 6200	Bacteria	Proteobacteria	Gammaproteobacteria	0	0	0	0	0	0	0	0	0	0	0	0	0	0	0	0	0	0	1	1	0	1	1	1	0	1	0	1	0	1	0	1	1	1	0	0	1
Acinetobacter baumannii NCGM 237 DNA	Bacteria	Proteobacteria	Gammaproteobacteria	0	0	0	0	0	0	0	0	0	0	0	0	0	0	0	0	0	0	1	1	0	1	1	1	0	1	0	1	0	1	0	1	1	1	0	0	1
Acinetobacter baumannii DNA	Bacteria	Proteobacteria	Gammaproteobacteria	0	0	0	0	0	0	0	0	0	0	0	0	0	0	0	0	0	0	1	1	0	1	1	1	0	1	0	1	0	1	0	1	1	1	0	0	1
Acinetobacter baumannii strain A1	Bacteria	Proteobacteria	Gammaproteobacteria	0	0	0	0	0	1	0	0	0	0	0	0	0	0	0	0	0	0	1	1	0	1	1	1	0	1	0	1	0	1	0	1	1	1	0	0	1
Acinetobacter baumannii strain ORAB01	Bacteria	Proteobacteria	Gammaproteobacteria	0	0	0	0	0	0	0	0	0	0	0	0	0	0	0	0	0	0	1	1	0	1	1	1	0	1	0	1	0	1	0	1	1	1	0	0	1
Acinetobacter baumannii strain AB5075-UW	Bacteria	Proteobacteria	Gammaproteobacteria	0	0	0	0	0	1	0	0	0	0	0	0	0	0	0	0	0	0	1	1	0	1	1	1	0	1	0	1	0	1	0	1	1	1	0	0	1
Acinetobacter baumannii strain XH386	Bacteria	Proteobacteria	Gammaproteobacteria	0	0	0	0	0	0	0	0	0	0	0	0	0	0	0	0	0	0	1	1	0	1	1	1	0	1	0	1	0	1	0	1	1	1	0	0	1
Acinetobacter baumannii Ab04-mff	Bacteria	Proteobacteria	Gammaproteobacteria	0	0	0	0	0	0	0	0	0	0	0	0	0	0	0	0	0	0	1	1	0	1	1	1	0	1	0	1	0	1	0	1	1	1	0	0	1
Acinetobacter baumannii ATCC 17978-mff	Bacteria	Proteobacteria	Gammaproteobacteria	0	0	0	0	0	0	0	0	0	0	0	0	0	0	0	0	0	0	1	1	0	1	1	1	0	1	0	1	0	1	0	1	1	1	0	0	1
Acinetobacter baumannii genome assembly R2090	Bacteria	Proteobacteria	Gammaproteobacteria	0	0	0	0	0	0	0	0	0	0	0	0	0	0	0	0	0	0	1	1	0	1	1	1	0	1	0	1	0	1	0	1	1	1	0	0	1
Acinetobacter baumannii strain D36	Bacteria	Proteobacteria	Gammaproteobacteria	0	0	0	0	0	1	0	0	0	0	0	0	0	0	0	0	0	0	1	1	0	1	1	1	0	1	0	1	0	1	0	1	1	1	0	0	1
Acinetobacter baumannii genome assembly CIP70.10	Bacteria	Proteobacteria	Gammaproteobacteria	0	0	0	0	0	1	0	0	0	0	0	0	0	0	0	0	0	0	1	1	0	1	1	1	0	1	0	1	0	1	0	1	1	1	0	0	1
Acinetobacter baumannii strain KBN10P02143	Bacteria	Proteobacteria	Gammaproteobacteria	0	0	0	0	0	0	0	0	0	0	0	0	0	0	0	0	0	0	1	1	0	1	1	1	0	1	0	1	0	1	0	1	1	1	0	0	1
Acinetobacter baumannii genome assembly R2091	Bacteria	Proteobacteria	Gammaproteobacteria	0	0	0	0	0	1	0	0	0	0	0	0	0	0	0	0	0	0	1	1	0	1	1	1	0	1	0	1	0	1	0	1	1	1	0	0	1
Acinetobacter baumannii strain YU-R612	Bacteria	Proteobacteria	Gammaproteobacteria	0	0	0	0	0	0	0	0	0	0	0	0	0	0	0	0	0	0	1	1	0	1	1	1	0	1	0	1	0	1	0	1	1	1	0	0	1
Acinetobacter baumannii strain XH860	Bacteria	Proteobacteria	Gammaproteobacteria	0	0	0	0	0	0	0	0	0	0	0	0	0	0	0	0	0	0	1	1	0	1	1	1	0	1	0	1	0	1	0	1	1	1	0	0	1
Acinetobacter baumannii strain XH859	Bacteria	Proteobacteria	Gammaproteobacteria	0	0	0	0	0	0	0	0	0	0	0	0	0	0	0	0	0	0	1	1	0	1	1	1	0	1	0	1	0	1	0	1	1	1	0	0	1
Acinetobacter baumannii strain XH857	Bacteria	Proteobacteria	Gammaproteobacteria	0	0	0	0	0	0	0	0	0	0	0	0	0	0	0	0	0	0	1	1	0	1	1	1	0	1	0	1	0	1	0	1	1	1	0	0	1
Acinetobacter baumannii strain XH856	Bacteria	Proteobacteria	Gammaproteobacteria	0	0	0	0	0	0	0	0	0	0	0	0	0	0	0	0	0	0	1	1	0	1	1	1	0	1	0	1	0	1	0	1	1	1	0	0	1
Acinetobacter baumannii strain XH858	Bacteria	Proteobacteria	Gammaproteobacteria	0	0	0	0	0	0	0	0	0	0	0	0	0	0	0	0	0	0	1	1	0	1	1	1	0	1	0	1	0	1	0	1	1	1	0	0	1
Acinetobacter baumannii strain 3207	Bacteria	Proteobacteria	Gammaproteobacteria	0	0	0	0	0	1	0	0	0	0	0	0	0	0	0	0	0	0	1	1	0	1	1	1	0	1	0	1	0	1	0	1	1	1	0	0	1
Acinetobacter baumannii strain KAB01	Bacteria	Proteobacteria	Gammaproteobacteria	0	0	0	0	0	0	0	0	0	0	0	0	0	0	0	0	0	0	1	1	0	1	1	1	0	1	0	1	0	1	0	1	1	1	0	0	1
Acinetobacter baumannii strain KAB02	Bacteria	Proteobacteria	Gammaproteobacteria	0	0	0	0	0	0	0	0	0	0	0	0	0	0	0	0	0	0	1	1	0	1	1	1	0	1	0	1	0	1	0	1	1	1	0	0	1
Acinetobacter baumannii strain KAB03	Bacteria	Proteobacteria	Gammaproteobacteria	0	0	0	0	0	0	0	0	0	0	0	0	0	0	0	0	0	0	1	1	0	1	1	1	0	1	0	1	0	1	0	1	1	1	0	0	1
Acinetobacter baumannii strain KAB04	Bacteria	Proteobacteria	Gammaproteobacteria	0	0	0	0	0	0	0	0	0	0	0	0	0	0	0	0	0	0	1	1	0	1	1	1	0	1	0	1	0	1	0	1	1	1	0	0	1
Acinetobacter baumannii strain KAB05	Bacteria	Proteobacteria	Gammaproteobacteria	0	0	0	0	0	0	0	0	0	0	0	0	0	0	0	0	0	0	1	1	0	1	1	1	0	1	0	1	0	1	0	1	1	1	0	0	0
Acinetobacter baumannii strain KAB06	Bacteria	Proteobacteria	Gammaproteobacteria	0	0	0	0	0	0	0	0	0	0	0	0	0	0	0	0	0	0	1	1	0	1	1	1	0	1	0	1	0	1	0	1	1	1	0	0	1
Acinetobacter baumannii strain KAB07	Bacteria	Proteobacteria	Gammaproteobacteria	0	0	0	0	0	0	0	0	0	0	0	0	0	0	0	0	0	0	1	1	0	1	1	1	0	1	0	1	0	1	0	1	1	1	0	0	1
Acinetobacter baumannii strain KAB08	Bacteria	Proteobacteria	Gammaproteobacteria	0	0	0	0	0	0	0	0	0	0	0	0	0	0	0	0	0	0	1	1	0	1	1	1	0	1	0	1	0	1	0	1	1	1	0	0	1
Acinetobacter baumannii strain 3027STDY5784958 genome assembly	Bacteria	Proteobacteria	Gammaproteobacteria	0	0	0	0	0	0	0	0	0	0	0	0	0	0	0	0	0	0	1	1	0	1	1	1	0	1	0	1	0	1	0	1	1	1	0	0	1
Aciduliprofundum boonei T469	Archaea	Euryarchaeota	DHVE2_group	0	0	0	0	0	0	0	0	0	0	0	0	1	0	0	0	0	0	0	0	0	0	0	0	0	0	0	0	0	0	0	1	0	0	0	0	0
complete chromosome Acholeplasma brassicae.	Bacteria	Tenericutes	Mollicutes	0	0	0	0	0	0	0	0	0	0	0	0	0	0	0	0	0	0	1	1	0	1	0	1	0	1	0	0	0	0	1	1	0	1	0	0	0
Acidithiobacillus caldus ATCC 51756	Bacteria	Proteobacteria	Acidithiobacillia	0	0	0	0	0	0	0	0	0	0	0	0	0	0	0	0	0	0	1	1	0	1	1	1	1	1	0	0	0	1	0	1	1	1	0	0	1
Acidithiobacillus caldus SM-1	Bacteria	Proteobacteria	Acidithiobacillia	0	0	0	0	0	0	0	0	0	0	0	0	0	0	0	0	0	0	1	1	0	1	1	1	1	1	0	0	0	1	0	1	1	1	0	0	1
Acidobacterium capsulatum ATCC 51196	Bacteria	Acidobacteria	Acidobacteriales	0	0	1	0	0	0	0	0	0	0	0	0	0	0	0	0	0	1	1	0	0	1	1	1	1	1	0	0	0	1	0	1	1	1	1	0	0
Acidothermus cellulolyticus 11B	Bacteria	Actinobacteria	Acidothermales	0	0	0	0	0	0	0	0	0	0	0	0	0	0	0	0	0	0	1	1	0	1	0	1	0	1	0	0	0	1	0	1	1	1	0	1	0
Acidovorax citrulli AAC00-1	Bacteria	Proteobacteria	Betaproteobacteria	0	0	0	0	0	0	0	0	0	0	0	0	0	0	0	0	0	1	1	0	0	1	1	1	1	1	1	1	0	1	0	1	1	1	1	0	0
Acidiphilium cryptum JF-5	Bacteria	Proteobacteria	Alphaproteobacteria	0	0	0	0	1	0	0	0	0	0	0	0	0	0	0	0	0	0	1	0	0	1	1	1	1	1	0	0	0	1	0	1	1	1	1	0	0
Achromobacter denitrificans strain USDA-ARS-USMARC-56712	Bacteria	Proteobacteria	Betaproteobacteria	0	0	0	0	0	0	0	0	0	0	0	0	0	0	0	0	0	1	1	0	0	1	1	1	1	1	0	0	0	1	0	1	1	1	1	0	0
Acidovorax ebreus TPSY	Bacteria	Proteobacteria	Betaproteobacteria	0	0	0	0	0	0	0	0	1	0	0	0	0	0	0	0	0	1	1	0	0	1	1	1	1	1	1	0	0	1	0	1	1	1	1	0	0
Acinetobacter sp. 114	Bacteria	Proteobacteria	Gammaproteobacteria	0	0	0	0	0	0	0	0	0	0	0	0	0	0	0	0	0	0	1	1	0	1	1	1	0	1	0	1	0	1	0	1	1	1	0	0	1
Actinobacillus equuli subsp. equuli strain 19392	Bacteria	Proteobacteria	Gammaproteobacteria	0	0	0	0	0	1	0	0	0	0	0	0	0	0	0	0	0	0	1	1	0	1	1	1	1	1	1	0	0	1	0	1	1	1	0	0	1
Acidithiobacillus ferrivorans SS3	Bacteria	Proteobacteria	Acidithiobacillia	0	0	0	0	0	0	0	0	0	0	0	0	0	0	0	0	0	0	1	1	0	1	1	1	1	1	0	1	0	1	0	1	1	1	0	0	1
Acidimicrobium ferrooxidans DSM 10331	Bacteria	Actinobacteria	Acidimicrobiia	0	0	0	0	1	0	0	0	0	0	0	0	0	0	0	0	0	0	1	1	0	1	0	1	0	0	0	0	0	1	0	1	1	1	0	0	0
Acidaminococcus fermentans DSM 20731	Bacteria	Firmicutes	Negativicutes	0	0	1	0	0	0	0	0	0	0	0	0	0	0	0	0	0	0	1	1	0	1	1	1	0	1	0	1	0	1	0	1	1	1	1	0	0
Acidithiobacillus ferrooxidans ATCC 53993	Bacteria	Proteobacteria	Acidithiobacillia	0	0	0	0	0	0	0	0	0	0	0	0	0	0	0	0	0	0	1	1	0	1	1	1	1	1	0	0	0	1	0	1	1	1	0	0	1
Acidithiobacillus ferrooxidans ATCC 23270	Bacteria	Proteobacteria	Acidithiobacillia	0	0	0	0	0	0	0	0	0	0	0	0	0	0	1	0	0	0	1	1	0	1	1	1	1	1	0	0	0	1	0	1	1	1	0	0	1
Actinoplanes friuliensis DSM 7358	Bacteria	Actinobacteria	Micromonosporales	0	0	0	0	0	0	0	0	0	0	0	0	0	0	0	0	0	1	1	1	0	1	0	1	1	1	0	0	0	1	0	1	1	1	0	1	0
Acidianus hospitalis W1	Archaea	Crenarchaeota	Thermoprotei	1	0	0	0	0	0	0	0	0	0	0	0	1	0	0	0	0	0	0	0	0	0	0	0	0	0	0	0	0	0	0	0	0	0	0	0	0
Actinoalloteichus hymeniacidonis strain HPA177(T) (=DSM 45092(T))	Bacteria	Actinobacteria	Pseudonocardiales	0	0	1	0	1	0	0	0	0	0	0	0	0	0	0	0	0	1	1	1	0	1	0	1	1	1	0	1	0	1	0	1	0	1	0	1	0
Acidaminococcus intestini RyC-MR95	Bacteria	Firmicutes	Negativicutes	0	0	0	0	0	0	1	0	0	0	0	0	0	0	0	0	0	0	1	1	0	1	1	1	0	1	0	1	0	1	0	1	1	1	1	0	0
Acinetobacter johnsonii XBB1	Bacteria	Proteobacteria	Gammaproteobacteria	0	0	0	0	0	0	0	0	0	0	0	0	0	0	0	0	0	0	1	1	0	1	1	1	0	1	0	1	0	1	0	1	1	1	0	0	1
Acholeplasma laidlawii PG-8A	Bacteria	Tenericutes	Mollicutes	0	0	0	0	0	0	0	0	0	0	0	0	0	0	0	0	0	0	1	1	0	1	0	1	0	1	0	0	0	0	1	1	0	1	0	0	0
Acaryochloris marina MBIC11017	Bacteria	Cyanobacteria	Oscillatoriophycideae	0	0	0	0	0	0	0	0	0	0	0	0	0	0	0	0	0	0	1	1	0	1	1	1	1	0	0	0	0	1	0	1	1	1	0	0	0
Actinomyces meyeri strain W712	Bacteria	Actinobacteria	Actinomycetales	0	0	0	0	0	0	0	0	0	0	0	0	0	0	0	0	0	0	1	1	0	1	0	1	0	1	0	0	0	1	0	1	1	1	0	1	0
Actinoplanes missouriensis 431 DNA	Bacteria	Actinobacteria	Micromonosporales	0	0	0	0	0	0	0	0	0	0	0	0	0	0	0	0	0	1	1	1	0	1	0	1	1	0	0	1	0	1	0	1	1	1	0	1	0
Actinosynnema mirum DSM 43827	Bacteria	Actinobacteria	Pseudonocardiales	0	0	0	0	0	0	0	0	0	0	0	0	0	0	0	0	0	1	1	1	0	1	0	1	1	1	0	0	0	1	0	1	0	1	0	1	0
Acidiphilium multivorum AIU301 DNA	Bacteria	Proteobacteria	Alphaproteobacteria	0	0	0	0	0	0	0	0	0	0	0	0	0	0	0	0	0	0	1	0	0	1	1	1	1	1	0	0	0	1	0	1	1	1	1	0	0
Acinetobacter baumannii strain 6411	Bacteria	Proteobacteria	Gammaproteobacteria	0	0	0	0	0	0	0	0	0	0	0	0	0	0	0	0	0	0	1	1	0	1	1	1	0	1	0	1	0	1	0	1	1	1	0	0	1
Acholeplasma oculi genome assembly Acholeplasma oculi strain 19L	Bacteria	Tenericutes	Mollicutes	0	0	0	0	0	0	0	0	0	0	0	0	0	0	0	0	0	0	1	1	0	1	0	1	1	1	0	0	0	0	1	1	0	1	0	0	0
Acinetobacter oleivorans DR1	Bacteria	Proteobacteria	Gammaproteobacteria	0	0	0	0	0	0	0	0	0	0	0	0	0	0	0	0	0	0	1	1	0	1	1	1	0	1	0	1	0	1	0	1	1	1	0	0	1
Actinomyces oris strain T14V	Bacteria	Actinobacteria	Actinomycetales	0	0	0	0	0	0	0	0	0	0	0	0	0	1	0	0	0	0	1	1	0	1	0	1	0	1	0	0	0	1	0	1	1	1	0	1	0
complete chromosome Acholeplasma palmae.	Bacteria	Tenericutes	Mollicutes	0	0	0	0	0	0	0	0	1	0	0	0	0	0	0	0	0	0	1	1	0	1	0	1	0	1	0	0	0	1	1	1	0	1	0	0	0
Acetobacter pasteurianus IFO 3283-01 DNA	Bacteria	Proteobacteria	Alphaproteobacteria	0	0	0	0	1	0	0	0	0	0	0	0	0	0	0	0	0	0	1	0	0	1	1	1	1	1	0	0	0	1	0	1	1	1	1	0	0
Acetobacter pasteurianus IFO 3283-03 DNA	Bacteria	Proteobacteria	Alphaproteobacteria	0	0	0	0	1	0	0	0	0	0	0	0	0	0	0	0	0	0	1	0	0	1	1	1	1	1	0	0	0	1	0	1	1	1	1	0	0
Acetobacter pasteurianus IFO 3283-07 DNA	Bacteria	Proteobacteria	Alphaproteobacteria	0	0	0	0	1	0	0	0	0	0	0	0	0	0	0	0	0	0	1	0	0	1	1	1	1	1	0	0	0	1	0	1	1	1	1	0	0
Acetobacter pasteurianus IFO 3283-22 DNA	Bacteria	Proteobacteria	Alphaproteobacteria	0	0	0	0	1	0	0	0	0	0	0	0	0	0	0	0	0	0	1	0	0	1	1	1	1	1	0	0	0	1	0	1	1	1	1	0	0
Acetobacter pasteurianus IFO 3283-26 DNA	Bacteria	Proteobacteria	Alphaproteobacteria	0	0	0	0	1	0	0	0	0	0	0	0	0	0	0	0	0	0	1	0	0	1	1	1	1	1	0	0	0	1	0	1	1	1	1	0	0
Acetobacter pasteurianus IFO 3283-32 DNA	Bacteria	Proteobacteria	Alphaproteobacteria	0	0	0	0	1	0	0	0	0	0	0	0	0	0	0	0	0	0	1	0	0	1	1	1	1	1	0	0	0	1	0	1	1	1	1	0	0
Acetobacter pasteurianus IFO 3283-01-42C DNA	Bacteria	Proteobacteria	Alphaproteobacteria	0	0	0	0	1	0	0	0	0	0	0	0	0	0	0	0	0	0	1	0	0	1	1	1	1	1	0	0	0	1	0	1	1	1	1	0	0
Acetobacter pasteurianus IFO 3283-12 DNA	Bacteria	Proteobacteria	Alphaproteobacteria	0	0	0	0	1	0	0	0	0	0	0	0	0	0	0	0	0	0	1	0	0	1	1	1	1	1	0	0	0	1	0	1	1	1	1	0	0
Acetobacter pasteurianus NBRC 101655 DNA	Bacteria	Proteobacteria	Alphaproteobacteria	0	0	0	0	0	0	0	0	0	0	0	0	0	0	0	0	0	0	1	0	0	1	1	1	1	1	0	0	0	1	0	1	1	1	1	0	0
Acetobacter pasteurianus 386B	Bacteria	Proteobacteria	Alphaproteobacteria	0	0	0	0	0	0	0	0	0	0	0	0	0	0	0	0	0	0	1	0	0	1	1	1	1	1	0	0	0	1	0	1	1	1	1	0	0
Acetobacter pasteurianus strain Ab3	Bacteria	Proteobacteria	Alphaproteobacteria	0	0	0	0	0	0	0	0	0	0	0	0	0	0	0	0	0	0	1	0	0	1	1	1	1	1	0	0	0	1	0	1	1	1	1	0	0
Acetobacter pasteurianus subsp. ascendens strain LMG 1590	Bacteria	Proteobacteria	Alphaproteobacteria	0	0	0	0	0	0	0	0	0	0	0	0	0	0	0	0	0	0	1	0	0	1	1	1	1	1	0	0	0	1	0	1	1	1	1	0	0
Acetobacter pasteurianus subsp. paradoxus strain LMG 1591	Bacteria	Proteobacteria	Alphaproteobacteria	0	0	0	0	0	1	0	0	0	0	0	0	0	0	0	0	0	0	1	0	0	1	1	1	1	1	0	0	0	1	0	1	1	1	1	0	0
Acinetobacter calcoaceticus PHEA-2 chromosome	Bacteria	Proteobacteria	Gammaproteobacteria	0	0	0	0	0	0	0	0	0	0	0	0	0	0	0	0	0	0	1	1	0	1	1	1	0	1	0	1	0	1	0	1	1	1	0	0	1
Acinetobacter pittii strain AP_882	Bacteria	Proteobacteria	Gammaproteobacteria	0	0	0	0	0	0	0	0	0	0	0	0	0	0	0	0	0	0	1	1	0	1	1	1	0	1	0	1	0	1	0	1	1	1	0	0	1
Acinetobacter pittii strain IEC338SC	Bacteria	Proteobacteria	Gammaproteobacteria	0	0	0	0	0	0	0	0	0	0	0	0	0	0	0	0	0	0	1	1	0	1	1	1	0	1	0	1	0	1	0	1	1	1	0	0	1
Actinobacillus pleuropneumoniae L20 serotype 5b complete genome.	Bacteria	Proteobacteria	Gammaproteobacteria	0	0	0	0	0	1	0	0	0	0	0	0	0	0	0	0	0	0	1	1	0	1	1	1	1	1	1	0	0	1	0	1	1	1	0	0	1
Actinobacillus pleuropneumoniae serovar 3 str. JL03	Bacteria	Proteobacteria	Gammaproteobacteria	0	0	0	0	0	1	0	0	0	0	0	0	0	0	0	0	0	0	1	1	0	1	1	1	1	0	1	0	0	1	0	1	1	0	0	0	1
Actinobacillus pleuropneumoniae serovar 7 str. AP76	Bacteria	Proteobacteria	Gammaproteobacteria	0	0	0	0	0	1	0	0	0	0	0	0	0	0	0	0	0	0	1	1	0	1	1	1	1	1	1	0	0	1	0	1	1	0	0	0	1
Actinobacillus pleuropneumoniae serovar 8 genome assembly MIDG2331	Bacteria	Proteobacteria	Gammaproteobacteria	0	0	0	0	0	1	0	0	0	0	0	0	0	0	0	0	0	0	1	1	0	1	1	1	1	1	1	0	0	1	0	1	1	1	0	0	1
Acidihalobacter prosperus strain F5	Bacteria	Proteobacteria	Gammaproteobacteria	0	0	0	0	0	0	0	0	0	0	0	0	0	0	0	0	0	0	1	1	0	1	1	1	1	1	0	0	0	1	0	0	1	1	0	0	1
Actinomyces radicidentis strain CCUG 36733	Bacteria	Actinobacteria	Actinomycetales	0	0	0	0	0	0	0	0	0	0	0	0	0	0	0	0	0	0	1	1	0	1	0	1	0	1	0	0	0	1	0	1	1	1	0	1	0
Acidilobus saccharovorans 345-15	Archaea	Crenarchaeota	Thermoprotei	0	0	0	0	0	0	0	0	0	0	0	0	0	0	0	0	0	0	0	0	0	0	0	0	0	0	0	0	0	0	0	0	0	0	0	0	0
Actinobaculum schaalii strain CCUG 27420	Bacteria	Actinobacteria	Actinomycetales	0	0	0	0	1	0	0	0	0	0	0	0	0	0	0	0	0	0	1	1	0	1	0	1	0	1	0	1	0	1	0	1	1	1	0	0	0
Acetobacter senegalensis genome assembly Acetobacter senegalensis 108B	Bacteria	Proteobacteria	Alphaproteobacteria	0	0	0	0	0	0	0	0	0	0	0	0	0	0	0	0	0	0	1	1	0	1	1	1	1	1	0	0	0	1	0	1	1	1	1	0	0
Actinoplanes sp. SE50/110	Bacteria	Actinobacteria	Micromonosporales	0	0	0	0	0	0	0	0	0	0	0	0	0	0	0	0	0	1	1	1	0	1	0	1	1	1	0	1	0	1	0	1	1	1	0	0	0
Acinetobacter sp. TGL-Y2	Bacteria	Proteobacteria	Gammaproteobacteria	0	0	0	0	0	0	0	0	0	0	0	0	0	0	0	0	0	0	1	1	0	1	1	1	0	1	0	1	0	1	0	1	1	1	0	0	1
Acinetobacter sp. NCu2D-2	Bacteria	Proteobacteria	Gammaproteobacteria	0	0	0	0	0	0	0	0	0	0	0	0	0	0	0	0	0	0	1	1	0	1	1	1	0	1	0	1	0	0	0	1	1	1	0	0	1
Acetobacter sp. SLV-7	Bacteria	Proteobacteria	Alphaproteobacteria	0	0	1	0	0	0	0	0	0	0	0	0	0	0	0	0	0	0	1	0	0	1	1	1	1	1	0	0	0	1	0	1	1	1	1	0	0
Acinetobacter sp. TTH0-4	Bacteria	Proteobacteria	Gammaproteobacteria	0	0	0	0	0	0	0	0	0	0	0	0	0	0	0	0	0	0	1	1	0	1	1	1	0	1	0	1	0	1	0	1	1	1	0	0	1
Acinetobacter sp. BRTC-1	Bacteria	Proteobacteria	Gammaproteobacteria	0	0	0	0	0	0	0	0	0	0	0	0	0	0	0	0	0	0	1	1	0	1	1	1	0	1	0	1	0	1	0	1	1	1	0	0	1
Acidovorax sp. RAC01	Bacteria	Proteobacteria	Betaproteobacteria	0	0	1	0	0	0	0	0	0	0	0	0	0	0	0	0	0	0	1	0	0	1	1	1	1	1	1	0	0	1	0	1	1	1	1	0	0
Actinomyces sp. VUL4_3	Bacteria	Actinobacteria	Actinomycetales	0	0	0	0	0	0	0	0	0	0	0	0	0	0	0	0	0	0	1	1	0	1	0	1	0	1	0	0	0	1	0	1	1	1	0	0	0
Acidovorax sp. JS42	Bacteria	Proteobacteria	Betaproteobacteria	0	0	0	0	0	1	0	0	0	0	0	0	0	0	0	0	0	1	1	0	0	1	1	1	1	1	1	0	0	1	0	1	1	1	1	0	0
Acidovorax sp. KKS102	Bacteria	Proteobacteria	Betaproteobacteria	0	0	0	0	0	0	0	0	0	0	0	0	0	0	0	0	0	0	1	0	0	1	1	1	1	1	1	0	0	1	0	1	1	1	0	0	0
Acinetobacter sp. ADP1 complete genome.	Bacteria	Proteobacteria	Gammaproteobacteria	0	0	0	0	0	1	0	0	0	0	0	0	0	0	0	0	0	0	1	1	0	1	1	1	0	1	0	1	0	1	0	1	1	1	0	0	1
Actinoplanes sp. N902-109	Bacteria	Actinobacteria	Micromonosporales	0	0	0	0	0	0	0	0	0	0	0	0	0	0	0	0	0	1	1	1	0	1	0	1	1	1	0	1	0	1	0	1	1	0	0	1	0
Aciduliprofundum sp. MAR08-339	Archaea	Euryarchaeota	DHVE2_group	0	1	0	0	0	0	0	0	0	0	0	0	0	0	0	0	0	0	0	0	0	0	0	0	0	0	0	0	0	0	0	1	0	0	0	0	0
Actinomyces sp. oral taxon 414 strain F0588	Bacteria	Actinobacteria	Actinomycetales	0	0	0	0	1	0	0	0	0	0	0	0	1	0	0	0	0	0	1	1	0	1	0	1	0	1	0	0	0	1	0	1	1	1	0	1	0
Clostridium sticklandii str. DSM 519 chromosome	Bacteria	Firmicutes	Clostridia	0	0	0	0	0	0	0	0	0	0	0	0	0	0	0	0	0	0	1	1	0	1	1	1	1	1	0	1	0	1	0	1	1	1	1	0	0
Actinobacillus succinogenes 130Z	Bacteria	Proteobacteria	Gammaproteobacteria	0	0	1	0	0	0	0	0	1	0	0	0	0	0	0	0	0	0	1	1	0	1	1	1	1	1	1	0	0	1	0	1	1	1	0	0	1
Actinobacillus suis ATCC 33415	Bacteria	Proteobacteria	Gammaproteobacteria	0	0	0	0	0	0	0	0	1	0	0	0	0	0	0	0	0	0	1	1	0	1	1	1	1	1	1	0	0	1	0	1	1	1	0	0	1
Acetobacterium woodii DSM 1030	Bacteria	Firmicutes	Clostridia	0	1	0	0	0	0	0	0	0	0	0	0	0	0	0	0	0	0	1	1	0	1	1	1	1	1	0	1	0	1	1	1	0	1	1	0	0
Achromobacter xylosoxidans A8	Bacteria	Proteobacteria	Betaproteobacteria	0	0	0	0	0	0	0	0	0	0	0	0	0	0	0	0	0	1	1	0	0	1	1	1	1	1	0	0	0	1	0	1	1	1	1	0	0
Achromobacter xylosoxidans C54	Bacteria	Proteobacteria	Betaproteobacteria	0	0	0	0	0	0	0	0	0	0	0	0	0	0	0	0	0	1	1	0	0	1	0	1	1	1	0	0	0	1	0	1	1	1	0	0	0
Achromobacter xylosoxidans genome assembly NCTC10807	Bacteria	Proteobacteria	Betaproteobacteria	0	0	0	0	0	0	0	0	0	0	0	0	0	0	0	0	0	1	1	0	0	1	1	1	1	1	0	0	0	1	0	1	1	1	0	0	0
Achromobacter xylosoxidans strain FDAARGOS_147	Bacteria	Proteobacteria	Betaproteobacteria	0	0	0	0	0	0	0	0	0	0	0	0	0	0	0	0	0	1	1	0	0	1	1	1	1	1	0	0	0	1	0	1	1	1	1	0	0
Adlercreutzia equolifaciens DSM 19450 DNA	Bacteria	Actinobacteria	Coriobacteriia	0	0	0	0	0	0	0	0	0	0	0	0	0	0	0	0	0	0	1	1	0	1	1	1	1	1	0	0	0	1	0	1	1	1	0	0	0
Advenella kashmirensis WT001	Bacteria	Proteobacteria	Betaproteobacteria	0	0	0	0	0	0	0	0	0	0	0	0	0	0	0	0	0	1	0	0	0	1	0	1	1	1	0	0	0	1	0	0	0	0	0	0	0
Advenella mimigardefordensis DPN7	Bacteria	Proteobacteria	Betaproteobacteria	0	0	0	0	0	0	0	0	0	0	0	0	0	0	0	0	0	0	1	0	0	1	1	1	1	1	0	0	0	1	0	1	1	1	1	0	0
Aerococcus christensenii strain CCUG28831	Bacteria	Firmicutes	Lactobacillales	0	0	0	0	1	0	0	0	0	0	0	0	0	0	0	0	0	0	1	1	0	1	1	1	1	1	0	0	0	1	1	1	0	1	1	0	0
Aeromicrobium erythreum strain AR18	Bacteria	Actinobacteria	Propionibacteriales	0	0	0	0	0	0	0	0	0	0	0	0	0	0	0	0	0	1	1	1	0	1	0	1	0	1	0	0	0	1	0	1	1	1	0	1	1
Aeromonas hydrophila subsp. hydrophila ATCC 7966 chromosome	Bacteria	Proteobacteria	Gammaproteobacteria	0	0	0	0	0	0	0	0	0	0	0	0	0	0	0	0	0	0	1	1	0	1	1	1	1	1	1	1	0	1	0	1	1	1	0	0	1
Aeromonas hydrophila ML09-119	Bacteria	Proteobacteria	Gammaproteobacteria	0	0	0	0	0	0	0	0	0	0	0	0	0	0	0	0	0	0	1	1	0	1	1	1	1	1	1	1	0	1	0	1	1	1	0	0	1
Aeromonas hydrophila 4AK4	Bacteria	Proteobacteria	Gammaproteobacteria	0	0	0	0	0	0	0	0	0	0	0	0	0	0	0	0	0	0	1	1	0	1	1	1	1	1	1	1	0	1	0	1	1	1	0	0	1
Aeromonas hydrophila YL17	Bacteria	Proteobacteria	Gammaproteobacteria	0	0	0	0	0	0	0	0	0	0	0	0	0	0	0	0	0	0	1	1	0	1	1	1	1	1	1	1	0	1	0	1	1	1	0	0	1
Aeromonas hydrophila AL09-71	Bacteria	Proteobacteria	Gammaproteobacteria	0	0	0	0	0	0	0	0	0	0	0	0	0	0	0	0	0	0	1	1	0	1	1	1	1	1	1	1	0	1	0	1	1	1	0	0	1
Aeromonas hydrophila pc104A	Bacteria	Proteobacteria	Gammaproteobacteria	0	0	0	0	0	0	0	0	0	0	0	0	0	0	0	0	0	0	1	1	0	1	1	1	1	1	1	1	0	1	0	1	1	1	0	0	1
Aeromonas hydrophila J-1	Bacteria	Proteobacteria	Gammaproteobacteria	0	0	0	0	0	0	0	0	0	0	0	0	0	0	0	0	0	0	1	1	0	1	1	1	1	1	1	0	0	1	0	1	1	1	0	0	1
Aeromonas hydrophila strain AL06-06	Bacteria	Proteobacteria	Gammaproteobacteria	0	0	0	0	0	0	0	0	0	0	0	0	0	0	0	0	0	0	1	1	0	1	1	1	1	1	1	0	0	1	0	1	1	1	0	0	1
Aeromonas hydrophila strain AH10	Bacteria	Proteobacteria	Gammaproteobacteria	0	0	0	0	0	0	0	0	0	0	0	0	0	0	0	0	0	0	1	1	0	1	1	1	1	1	1	1	0	1	0	1	1	1	0	0	1
Aeromonas hydrophila NJ-35	Bacteria	Proteobacteria	Gammaproteobacteria	0	0	0	0	0	0	0	0	0	0	0	0	0	0	0	0	0	0	1	1	0	1	1	1	1	1	1	1	0	1	0	1	1	1	0	0	1
Aeromonas hydrophila strain JBN2301	Bacteria	Proteobacteria	Gammaproteobacteria	0	0	0	0	0	0	0	0	0	0	0	0	0	0	0	0	0	0	1	1	0	1	1	1	1	1	1	1	0	1	0	1	1	1	0	0	1
Aeromonas hydrophila strain D4	Bacteria	Proteobacteria	Gammaproteobacteria	0	0	0	0	0	0	0	0	0	0	0	0	0	0	0	0	0	0	1	1	0	1	1	1	1	1	1	1	0	1	0	1	1	1	0	0	1
Aeromonas hydrophila strain GYK1	Bacteria	Proteobacteria	Gammaproteobacteria	0	0	0	0	0	0	0	0	0	0	0	0	0	0	0	0	0	0	1	1	0	1	1	1	1	1	1	1	0	1	0	1	1	1	0	0	1
Aeromonas hydrophila strain AHNIH1	Bacteria	Proteobacteria	Gammaproteobacteria	0	0	0	0	0	0	0	0	0	0	0	0	0	0	0	0	0	0	1	1	0	1	1	1	1	1	1	0	0	1	0	1	1	1	0	0	1
Aeromonas media WS	Bacteria	Proteobacteria	Gammaproteobacteria	0	0	0	0	0	0	0	0	0	0	0	0	0	0	0	0	0	0	1	1	0	1	1	1	1	1	1	1	0	1	0	1	1	1	0	0	1
Aerococcus sanguinicola strain CCUG43001	Bacteria	Firmicutes	Lactobacillales	0	0	0	0	1	0	0	0	0	0	0	0	0	0	0	0	0	0	1	1	0	1	1	1	1	1	0	0	0	1	1	1	0	1	1	0	0
Aeromonas salmonicida subsp. salmonicida A449	Bacteria	Proteobacteria	Gammaproteobacteria	0	0	0	0	0	0	0	0	0	0	0	0	0	0	0	0	0	0	1	1	0	1	1	1	1	0	1	1	0	1	0	1	1	1	0	0	1
Aeromonas schubertii strain WL1483	Bacteria	Proteobacteria	Gammaproteobacteria	0	0	0	0	0	0	0	0	0	0	0	0	0	0	0	0	0	0	1	1	0	1	1	1	1	1	1	1	0	1	0	1	1	1	0	0	1
Aequorivita sublithincola DSM 14238	Bacteria	Bacteroidetes	Flavobacteriia	0	0	0	0	0	0	0	0	0	0	0	0	0	0	0	0	0	1	1	1	0	1	1	1	1	1	0	0	0	0	0	1	1	1	1	0	0
Aerococcus urinaehominis strain CCUG42038B	Bacteria	Firmicutes	Lactobacillales	0	0	0	0	1	0	0	0	0	0	0	0	0	0	0	0	0	0	1	1	0	1	1	1	1	1	0	1	1	1	1	1	0	1	1	0	0
Aerococcus urinae ACS-120-V-Col10a	Bacteria	Firmicutes	Lactobacillales	0	0	0	0	0	0	0	0	0	0	0	0	0	0	0	0	0	0	1	1	0	1	1	1	1	1	0	1	0	1	1	1	0	1	1	0	0
Aerococcus urinae strain CCUG36881	Bacteria	Firmicutes	Lactobacillales	0	0	0	0	1	0	0	0	0	0	0	0	0	0	0	0	0	0	1	1	0	1	1	1	1	1	0	1	0	1	1	1	0	1	1	0	0
Aerococcus urinaeequi strain USDA-ARS-USMARC-56713	Bacteria	Firmicutes	Lactobacillales	0	0	0	0	1	0	0	0	0	0	0	0	0	0	0	0	0	0	1	1	0	1	1	1	0	1	0	0	0	1	1	1	0	1	1	0	0
Aerococcus urinaeequi strain CCUG28094	Bacteria	Firmicutes	Lactobacillales	0	0	0	0	0	0	0	0	0	0	0	0	0	0	0	0	0	0	1	1	0	1	1	1	0	1	0	0	0	1	1	1	0	1	1	0	0
Aeromonas veronii B565	Bacteria	Proteobacteria	Gammaproteobacteria	0	0	0	0	0	0	0	0	0	0	0	0	0	0	0	0	0	0	1	1	0	1	1	1	1	1	1	1	0	1	0	1	1	1	0	0	1
Aeromonas veronii strain TH0426	Bacteria	Proteobacteria	Gammaproteobacteria	0	0	0	0	0	0	0	0	0	0	0	0	0	0	0	0	0	0	1	1	0	1	1	1	1	1	1	1	0	1	0	1	1	1	0	0	1
Aeromonas veronii strain AVNIH1	Bacteria	Proteobacteria	Gammaproteobacteria	0	0	0	0	0	0	0	0	0	0	0	0	0	0	0	0	0	0	1	1	0	1	1	1	1	1	1	1	0	1	0	1	1	1	0	0	1
Aerococcus viridans strain CCUG4311	Bacteria	Firmicutes	Lactobacillales	0	0	0	0	0	0	0	0	0	0	0	0	0	0	0	0	0	0	1	1	0	1	1	1	0	1	0	0	0	1	1	1	0	1	1	0	0
Aggregatibacter actinomycetemcomitans ANH9381	Bacteria	Proteobacteria	Gammaproteobacteria	0	0	0	0	0	0	0	0	0	0	0	0	0	0	0	0	0	0	1	1	0	1	1	1	1	1	1	0	0	1	0	1	1	1	0	0	1
Aggregatibacter actinomycetemcomitans HK1651	Bacteria	Proteobacteria	Gammaproteobacteria	0	0	0	0	0	0	0	0	0	0	0	0	0	0	0	0	0	0	1	1	0	1	1	1	1	1	1	0	0	1	0	1	1	1	0	0	1
Aggregatibacter actinomycetemcomitans HK1651	Bacteria	Proteobacteria	Gammaproteobacteria	0	0	0	0	0	0	0	0	0	0	0	0	0	0	0	0	0	0	1	1	0	1	1	1	1	1	1	0	0	1	0	1	1	1	0	0	1
Aggregatibacter actinomycetemcomitans strain VT1169	Bacteria	Proteobacteria	Gammaproteobacteria	0	0	0	0	0	0	0	0	0	0	0	0	0	0	0	0	0	0	1	1	0	1	1	1	1	1	1	0	0	1	0	1	1	1	0	0	1
Aggregatibacter actinomycetemcomitans strain 624	Bacteria	Proteobacteria	Gammaproteobacteria	0	0	1	0	0	1	0	0	0	0	0	0	0	0	0	0	0	0	1	1	0	1	1	1	1	1	1	0	0	1	0	1	1	1	0	0	1
Aggregatibacter actinomycetemcomitans strain IDH781	Bacteria	Proteobacteria	Gammaproteobacteria	0	0	1	0	0	1	0	0	0	0	0	0	0	0	0	0	0	0	1	1	0	1	1	1	1	1	1	0	0	1	0	1	1	1	0	0	1
Aggregatibacter aphrophilus NJ8700	Bacteria	Proteobacteria	Gammaproteobacteria	0	0	1	0	0	0	0	0	0	0	0	0	0	0	0	0	0	0	1	1	0	1	1	1	1	1	1	0	0	1	0	1	1	1	0	0	1
Aggregatibacter aphrophilus NJ8700	Bacteria	Proteobacteria	Gammaproteobacteria	0	0	1	0	0	0	0	0	0	0	0	0	0	0	0	0	0	0	1	1	0	1	1	1	1	1	1	0	0	1	0	1	1	1	0	0	1
Aggregatibacter aphrophilus strain W10433	Bacteria	Proteobacteria	Gammaproteobacteria	0	0	1	0	0	0	0	0	0	0	0	0	0	0	0	0	0	0	1	1	0	1	1	1	1	1	1	0	0	1	0	1	1	1	0	0	1
Agrobacterium fabrum str. C58 chromosome circular	Bacteria	Proteobacteria	Alphaproteobacteria	0	0	0	0	0	0	0	0	0	0	0	0	0	0	0	0	0	1	1	0	0	1	1	1	1	1	0	0	0	1	0	1	1	1	1	0	0
Agarivorans gilvus strain WH0801	Bacteria	Proteobacteria	Gammaproteobacteria	0	0	0	0	0	0	0	0	0	0	0	0	0	0	0	0	0	0	1	1	0	0	1	1	1	1	1	1	0	1	0	1	1	1	0	0	1
Agrobacterium radiobacter K84 chromosome 1	Bacteria	Proteobacteria	Alphaproteobacteria	0	0	0	0	0	0	0	0	0	0	0	0	0	0	0	0	0	0	1	1	0	1	1	1	1	1	0	0	0	1	0	1	1	1	1	0	0
Agrobacterium sp. RAC06	Bacteria	Proteobacteria	Alphaproteobacteria	0	0	0	0	0	0	0	0	0	0	0	0	0	0	0	0	0	1	1	1	0	1	1	1	1	1	0	0	0	1	0	1	1	1	1	0	0
Agromyces sp. AR33	Bacteria	Actinobacteria	Micrococcales	0	0	0	0	0	0	0	0	0	0	0	0	0	0	0	0	0	1	1	1	0	1	0	1	1	1	0	0	0	1	0	1	1	1	0	1	0
Agrobacterium sp. H13-3 circular chromosome	Bacteria	Proteobacteria	Alphaproteobacteria	0	0	0	0	0	0	0	0	0	0	0	0	0	0	0	0	0	1	1	0	0	1	1	1	1	1	0	0	0	1	0	1	1	1	1	0	0
Agrobacterium tumefaciens strain Ach5 chromosome circular	Bacteria	Proteobacteria	Alphaproteobacteria	0	0	0	0	0	0	0	0	0	0	0	0	0	0	0	0	0	1	1	0	0	1	1	1	1	1	0	0	0	1	0	1	1	1	1	0	0
Agrobacterium tumefaciens strain S33 chromosome linear	Bacteria	Proteobacteria	Alphaproteobacteria	0	0	0	0	0	0	0	0	0	0	0	0	0	0	0	0	0	1	1	0	0	1	1	1	1	1	0	0	0	1	0	1	1	1	1	0	0
Agrobacterium vitis S4 chromosome 1	Bacteria	Proteobacteria	Alphaproteobacteria	0	0	0	0	0	0	0	0	0	0	0	0	0	0	0	0	0	1	1	1	0	1	1	1	1	1	0	0	0	1	0	1	1	1	1	0	0
Akkermansia glycaniphila isolate APytT genome assembly	Bacteria	Verrucomicrobia	Verrucomicrobiae	0	0	1	0	0	0	0	0	0	0	0	0	0	0	0	0	0	0	1	1	0	1	1	1	1	0	0	0	0	1	0	1	1	1	0	0	0
Akkermansia muciniphila ATCC BAA-835	Bacteria	Verrucomicrobia	Verrucomicrobiae	0	0	0	0	0	0	0	0	0	0	0	0	0	0	0	0	0	0	1	1	0	1	1	1	1	0	0	0	0	0	0	1	1	1	0	0	0
Akkermansia muciniphila strain YL44	Bacteria	Verrucomicrobia	Verrucomicrobiae	0	0	1	0	0	0	0	0	0	0	0	0	0	0	0	0	0	0	1	1	0	1	1	1	1	0	0	0	0	0	0	1	1	1	0	0	0
Alicyclobacillus acidocaldarius subsp. acidocaldarius DSM 446	Bacteria	Firmicutes	Bacillales	0	0	0	0	0	0	0	0	0	0	1	0	0	1	0	0	0	1	1	1	0	1	1	1	0	1	0	1	0	1	0	1	1	1	1	0	0
Alicyclobacillus acidocaldarius subsp. acidocaldarius Tc-4-1	Bacteria	Firmicutes	Bacillales	0	0	0	0	0	0	0	0	0	0	1	0	0	1	0	0	0	1	1	1	0	1	1	1	0	1	0	1	0	1	0	1	1	1	1	0	0
Alteromonas addita strain R10SW13	Bacteria	Proteobacteria	Gammaproteobacteria	0	0	0	0	0	0	0	0	0	0	0	0	0	0	0	0	0	0	1	1	0	1	1	1	1	1	1	1	0	1	0	1	1	1	0	0	1
Algibacter sp. HZ22	Bacteria	Bacteroidetes	Flavobacteriia	0	0	0	0	0	0	0	0	0	0	0	0	0	0	0	0	0	0	1	1	0	1	1	1	1	1	0	0	0	1	0	1	1	1	1	0	0
Altererythrobacter atlanticus strain 26DY36	Bacteria	Proteobacteria	Alphaproteobacteria	0	0	0	0	0	0	0	0	0	0	0	0	0	0	0	0	0	1	1	0	0	1	1	1	1	1	0	0	0	1	0	1	1	1	1	0	0
Alteromonas australica strain H 17	Bacteria	Proteobacteria	Gammaproteobacteria	0	0	0	0	0	0	0	0	0	0	0	0	0	0	0	0	0	0	1	1	0	1	1	1	1	1	1	1	0	1	0	1	1	1	0	0	1
Alteromonas australica strain DE170	Bacteria	Proteobacteria	Gammaproteobacteria	0	0	0	0	0	1	0	0	0	0	0	0	0	0	0	0	0	0	1	1	0	1	1	1	1	1	1	1	0	1	0	0	1	1	0	0	1
Alcanivorax borkumensis SK2	Bacteria	Proteobacteria	Gammaproteobacteria	0	0	0	0	0	0	0	0	0	0	0	0	0	0	0	0	0	0	1	1	0	1	1	1	1	1	0	0	0	1	0	1	1	1	0	0	1
Alicycliphilus denitrificans BC	Bacteria	Proteobacteria	Betaproteobacteria	0	0	0	0	0	0	0	0	1	0	0	0	0	0	0	0	0	0	1	0	0	1	1	1	1	1	1	0	0	1	0	1	1	1	1	0	0
Alicycliphilus denitrificans K601	Bacteria	Proteobacteria	Betaproteobacteria	0	0	0	0	0	0	0	0	1	0	0	0	0	0	0	0	0	0	1	0	0	1	1	1	1	1	1	0	0	1	0	1	1	1	1	0	0
Alcanivorax dieselolei B5	Bacteria	Proteobacteria	Gammaproteobacteria	0	0	0	0	0	1	0	0	0	0	0	0	0	0	0	0	0	0	1	1	0	1	1	1	1	1	0	0	0	1	0	1	1	1	0	0	1
Altererythrobacter dongtanensis strain KCTC 22672	Bacteria	Proteobacteria	Alphaproteobacteria	0	0	0	0	0	0	0	0	0	0	0	0	0	0	0	0	0	1	1	0	0	1	1	1	1	1	0	0	0	1	0	1	1	1	1	0	0
Alkalilimnicola ehrlichii MLHE-1	Bacteria	Proteobacteria	Gammaproteobacteria	0	0	0	0	1	0	0	0	0	0	0	0	0	0	0	0	0	0	1	1	0	1	1	1	1	1	0	0	0	1	0	1	1	1	0	0	1
Altererythrobacter epoxidivorans strain CGMCC 1.7731	Bacteria	Proteobacteria	Alphaproteobacteria	0	0	0	0	0	0	0	0	0	0	0	0	0	0	0	0	0	0	1	0	0	1	1	1	0	1	0	0	0	1	0	1	1	1	1	0	0
Alcaligenes faecalis strain ZD02	Bacteria	Proteobacteria	Betaproteobacteria	0	0	0	0	0	0	0	0	0	0	0	0	0	0	0	0	0	0	1	0	0	1	1	1	1	1	0	0	0	1	0	1	1	1	1	0	0
Alistipes finegoldii DSM 17242	Bacteria	Bacteroidetes	Bacteroidia	0	0	0	0	0	0	0	0	0	0	0	0	0	0	0	0	0	0	1	1	0	1	1	1	1	1	0	0	0	1	0	1	1	1	0	0	0
Francisella guangzhouensis strain 08HL01032	Bacteria	Proteobacteria	Gammaproteobacteria	0	0	0	0	0	0	0	0	0	0	0	0	0	0	0	0	0	0	1	1	0	1	1	1	0	1	1	0	0	0	0	1	1	1	0	0	1
Altererythrobacter ishigakiensis strain NBRC 107699	Bacteria	Proteobacteria	Alphaproteobacteria	0	0	0	0	0	0	0	0	0	0	0	0	0	0	0	0	0	0	1	0	0	1	1	1	0	1	0	0	0	1	0	1	1	1	1	0	0
Alteromonas macleodii ATCC 27126	Bacteria	Proteobacteria	Gammaproteobacteria	0	0	0	0	0	0	0	0	0	0	0	0	0	0	0	0	0	0	1	1	0	1	1	1	1	1	1	1	0	1	0	1	1	1	0	0	1
Alteromonas macleodii str. 'English Channel 673'	Bacteria	Proteobacteria	Gammaproteobacteria	0	0	0	0	0	0	0	0	0	0	0	0	0	0	0	0	0	0	1	1	0	1	1	1	1	1	1	1	0	1	0	1	1	1	0	0	1
Alteromonas macleodii str. 'Black Sea 11'	Bacteria	Proteobacteria	Gammaproteobacteria	0	0	0	0	0	0	0	0	0	0	0	0	0	0	0	0	0	0	1	1	0	1	1	1	1	1	1	1	0	1	0	1	1	1	0	0	1
Alteromonas macleodii str. 'Balearic Sea AD45'	Bacteria	Proteobacteria	Gammaproteobacteria	0	0	0	0	0	0	0	0	0	0	0	0	0	0	0	0	0	0	1	1	0	1	1	1	1	1	1	1	0	1	0	1	1	1	0	0	1
Alteromonas macleodii strain D7	Bacteria	Proteobacteria	Gammaproteobacteria	0	0	0	0	0	0	0	0	0	0	0	0	0	0	0	0	0	0	1	1	0	1	1	1	1	1	1	1	0	1	0	1	1	1	0	0	1
Alteromonas macleodii strain HOT1A3	Bacteria	Proteobacteria	Gammaproteobacteria	0	0	0	0	0	0	0	0	0	0	0	0	0	0	0	0	0	0	1	1	0	1	1	1	1	1	1	1	0	1	0	1	1	1	0	0	1
Altererythrobacter marensis strain KCTC 22370	Bacteria	Proteobacteria	Alphaproteobacteria	0	0	0	0	0	0	0	0	0	0	0	0	0	0	0	0	0	1	1	0	0	1	1	1	1	1	0	0	0	1	0	1	1	1	1	0	0
Alkaliphilus metalliredigens QYMF	Bacteria	Firmicutes	Clostridia	0	1	1	0	0	0	0	0	0	0	0	0	0	0	0	0	0	0	1	1	0	1	1	1	1	1	0	1	0	1	0	1	1	1	1	0	0
Alteromonas macleodii str. 'Deep ecotype'	Bacteria	Proteobacteria	Gammaproteobacteria	0	0	0	0	1	0	0	0	0	0	0	0	0	0	0	0	0	0	1	1	0	1	1	1	1	1	1	1	0	1	0	1	1	1	0	0	1
Alteromonas macleodii AltDE1	Bacteria	Proteobacteria	Gammaproteobacteria	0	0	0	0	0	0	0	0	0	0	0	0	0	0	0	0	0	0	1	1	0	1	1	1	1	1	1	1	0	1	0	1	1	1	0	0	1
Alteromonas macleodii str. 'Aegean Sea MED64'	Bacteria	Proteobacteria	Gammaproteobacteria	0	0	0	0	0	0	0	0	0	0	0	0	0	0	0	0	0	0	1	1	0	1	1	1	1	1	1	1	0	1	0	1	1	1	0	0	1
Alteromonas macleodii str. 'Ionian Sea U7'	Bacteria	Proteobacteria	Gammaproteobacteria	0	0	0	0	0	0	0	0	0	0	0	0	0	0	0	0	0	0	1	1	0	1	1	1	1	1	1	1	0	1	0	1	1	1	0	0	1
Alteromonas macleodii str. 'Ionian Sea U8'	Bacteria	Proteobacteria	Gammaproteobacteria	0	0	0	0	0	0	0	0	0	0	0	0	0	0	0	0	0	0	1	1	0	1	1	1	1	1	1	1	0	1	0	1	1	1	0	0	1
Alteromonas macleodii str. 'Ionian Sea UM7'	Bacteria	Proteobacteria	Gammaproteobacteria	0	0	0	0	0	0	0	0	0	0	0	0	0	0	0	0	0	0	1	1	0	1	1	1	1	1	1	1	0	1	0	1	1	1	0	0	1
Alteromonas macleodii str. 'Ionian Sea UM4b'	Bacteria	Proteobacteria	Gammaproteobacteria	0	0	0	0	0	0	0	0	0	0	0	0	0	0	0	0	0	0	1	1	0	1	1	1	1	1	1	1	0	1	0	1	1	1	0	0	1
Alteromonas mediterranea strain UM8	Bacteria	Proteobacteria	Gammaproteobacteria	0	0	0	0	0	0	0	0	0	0	0	0	0	0	0	0	0	0	1	1	0	1	1	1	1	1	1	1	0	1	0	1	1	1	0	0	1
Altererythrobacter namhicola strain JCM 16345	Bacteria	Proteobacteria	Alphaproteobacteria	0	0	0	0	0	0	0	0	0	0	0	0	0	0	0	0	0	0	1	1	0	1	1	1	1	1	0	0	0	1	0	1	1	1	1	0	0
Alteromonas sp. SN2	Bacteria	Proteobacteria	Gammaproteobacteria	0	0	0	0	0	0	0	0	0	0	0	0	0	0	0	0	0	0	1	1	0	1	1	1	1	1	1	0	0	1	0	1	1	1	0	0	1
Alkaliphilus oremlandii OhILAs	Bacteria	Firmicutes	Clostridia	0	0	0	0	0	0	0	0	0	0	0	0	0	0	0	0	0	0	1	1	0	1	1	1	1	1	0	1	0	1	0	1	1	1	1	0	0
Alcanivorax pacificus W11-5	Bacteria	Proteobacteria	Gammaproteobacteria	0	0	0	0	0	0	0	0	0	0	0	0	0	0	0	0	0	0	1	1	0	1	1	1	1	1	1	0	0	1	0	1	1	1	0	0	1
Alpha proteobacterium HIMB59	Bacteria	Proteobacteria	Alphaproteobacteria	0	0	0	0	0	0	0	0	0	0	0	0	0	0	0	0	0	0	1	0	0	1	1	1	0	1	1	0	0	1	0	1	0	0	0	0	0
Alpha proteobacterium HIMB5	Bacteria	Proteobacteria	Alphaproteobacteria	0	0	0	0	0	0	0	0	0	0	0	0	0	0	0	0	0	0	1	0	0	1	1	1	0	1	1	0	0	1	0	0	0	0	0	0	0
Aliivibrio salmonicida LFI1238 chromosome 1 complete genome.	Bacteria	Proteobacteria	Gammaproteobacteria	0	0	0	0	0	0	0	0	0	0	0	0	0	0	0	0	0	0	1	1	0	1	1	1	1	1	1	1	0	1	0	1	1	1	0	0	1
Alcanivorax sp. NBRC 101098 DNA	Bacteria	Proteobacteria	Gammaproteobacteria	0	0	0	0	0	0	0	0	0	0	0	0	0	0	0	0	0	0	1	1	0	1	1	1	1	1	0	0	0	1	0	1	1	1	0	0	1
Algoriphagus sp. M8-2	Bacteria	Bacteroidetes	Cytophagia	0	0	0	0	0	0	0	0	0	0	0	0	0	0	0	0	0	0	1	1	0	1	1	1	1	1	0	0	0	0	0	1	1	1	1	0	0
Alteromonas sp. Mac1	Bacteria	Proteobacteria	Gammaproteobacteria	0	0	0	0	0	0	0	0	0	0	0	0	0	0	0	0	0	0	1	1	0	1	1	1	1	1	1	1	0	1	0	1	1	1	0	0	1
Alteromonas stellipolaris LMG 21856	Bacteria	Proteobacteria	Gammaproteobacteria	0	0	0	0	0	0	0	0	0	0	0	0	0	0	0	0	0	0	1	1	0	1	1	1	1	1	1	1	0	1	0	1	1	1	0	0	1
Alteromonas stellipolaris strain LMG 21861	Bacteria	Proteobacteria	Gammaproteobacteria	0	0	0	0	0	0	0	0	0	0	0	0	0	0	0	0	0	0	1	1	0	1	1	1	1	1	1	1	0	1	0	1	1	1	1	0	1
Alteromonas stellipolaris strain PQQ-42	Bacteria	Proteobacteria	Gammaproteobacteria	0	0	0	0	0	0	0	0	0	0	0	0	0	0	0	0	0	0	1	1	0	1	1	1	1	1	1	1	0	1	0	1	1	1	0	0	1
Alteromonas stellipolaris strain PQQ-44	Bacteria	Proteobacteria	Gammaproteobacteria	0	0	0	0	0	0	0	0	0	0	0	0	0	0	0	0	0	0	1	1	0	1	1	1	1	1	1	1	0	1	0	1	1	1	0	0	1
Allochromatium vinosum DSM 180	Bacteria	Proteobacteria	Gammaproteobacteria	0	0	0	0	1	0	0	0	0	0	1	0	0	0	0	0	0	0	1	1	0	1	1	1	1	1	1	0	0	0	0	1	1	1	0	0	1
Aliivibrio wodanis genome assembly AWOD1	Bacteria	Proteobacteria	Gammaproteobacteria	0	0	0	0	0	1	0	0	0	0	0	0	0	0	0	0	0	0	1	1	0	1	1	1	1	1	1	1	0	1	0	1	1	1	0	0	1
Aminobacter aminovorans strain KCTC 2477	Bacteria	Proteobacteria	Alphaproteobacteria	0	0	0	0	0	0	0	0	0	0	0	0	0	0	0	0	0	1	1	0	0	1	1	1	1	0	0	0	0	1	0	1	1	1	1	0	0
Aminobacterium colombiense DSM 12261	Bacteria	Synergistetes	Synergistia	1	0	0	0	0	0	0	0	0	0	0	0	0	0	0	0	0	0	1	0	0	1	1	1	0	1	0	0	1	0	0	1	1	1	0	0	0
Ammonifex degensii KC4	Bacteria	Firmicutes	Clostridia	0	1	0	0	0	0	0	0	0	0	0	1	1	0	0	0	0	0	1	1	0	1	1	1	0	0	0	0	0	0	0	1	1	1	0	0	0
Amycolatopsis japonica strain MG417-CF17	Bacteria	Actinobacteria	Pseudonocardiales	0	0	0	0	0	0	0	0	0	0	0	0	0	0	0	0	0	1	1	1	0	1	0	1	1	1	0	0	0	1	0	1	1	1	0	1	0
Amycolatopsis methanolica 239	Bacteria	Actinobacteria	Pseudonocardiales	0	0	0	0	0	0	0	0	0	0	0	0	0	0	0	0	0	1	1	1	0	1	0	1	1	1	0	0	0	1	0	1	1	1	0	1	0
Amycolatopsis mediterranei U32 chromosome	Bacteria	Actinobacteria	Pseudonocardiales	0	0	0	0	1	0	0	0	0	0	0	0	0	0	0	0	0	1	1	1	0	1	0	1	1	1	0	1	0	1	0	1	1	1	0	1	0
Amycolatopsis mediterranei S699	Bacteria	Actinobacteria	Pseudonocardiales	0	0	0	0	1	0	0	0	0	0	0	0	0	0	0	0	0	1	1	1	0	1	0	1	1	1	0	1	0	1	0	1	1	1	0	1	0
Amycolatopsis mediterranei S699	Bacteria	Actinobacteria	Pseudonocardiales	0	0	0	0	1	0	0	0	0	0	0	0	0	0	0	0	0	1	1	1	0	1	0	1	1	1	0	1	0	1	0	1	1	1	0	1	0
Amycolatopsis mediterranei RB	Bacteria	Actinobacteria	Pseudonocardiales	0	0	0	0	1	0	0	0	0	0	0	0	0	0	0	0	0	1	1	1	0	1	0	1	1	1	0	1	0	1	0	1	1	1	0	1	0
Amycolatopsis orientalis HCCB10007	Bacteria	Actinobacteria	Pseudonocardiales	0	0	0	0	0	0	0	0	0	0	0	0	0	0	0	0	0	1	1	1	0	1	0	1	1	1	0	0	0	1	0	1	1	1	0	1	0
Amycolatopsis orientalis strain B-37	Bacteria	Actinobacteria	Pseudonocardiales	0	0	0	0	1	0	0	0	0	0	0	0	0	0	0	0	0	1	1	1	0	1	0	1	1	1	0	0	0	1	0	1	1	1	0	1	0
Amphibacillus xylanus NBRC 15112 DNA	Bacteria	Firmicutes	Bacillales	0	0	0	0	0	0	0	0	0	0	0	0	0	0	0	0	0	0	1	1	0	1	1	1	1	1	0	0	1	1	1	1	0	1	1	0	0
Anoxybacillus amylolyticus strain DSM 15939	Bacteria	Firmicutes	Bacillales	0	0	0	0	0	0	0	0	0	0	0	0	0	0	0	0	0	0	1	1	0	1	1	1	1	1	0	1	0	1	1	1	0	1	1	0	0
Anaerolineaceae bacterium oral taxon 439 strain W11661	Bacteria	Chloroflexi	Anaerolineae	0	0	1	0	0	0	0	0	0	0	0	0	0	0	0	0	0	0	1	0	0	1	1	1	0	1	0	1	0	1	0	1	1	1	0	0	0
Anaplasma centrale str. Israel	Bacteria	Proteobacteria	Alphaproteobacteria	0	0	0	0	0	0	0	0	0	0	0	0	0	0	0	0	0	0	1	0	0	1	1	1	0	0	0	0	0	0	0	0	1	1	0	0	0
Anabaena cylindrica PCC 7122	Bacteria	Cyanobacteria	Nostocales	0	0	0	1	0	0	0	0	0	0	1	1	1	0	0	0	0	0	1	1	0	1	1	1	1	0	0	1	0	1	0	1	1	1	0	0	0
Anaeromyxobacter dehalogenans 2CP-C	Bacteria	Proteobacteria	Deltaproteobacteria	0	0	0	0	0	0	0	0	0	0	0	0	0	0	0	0	0	1	1	1	0	1	1	1	1	1	0	1	0	1	0	1	1	1	1	0	0
Anaeromyxobacter dehalogenans 2CP-1	Bacteria	Proteobacteria	Deltaproteobacteria	0	0	0	0	1	0	0	0	0	0	0	0	0	0	0	0	0	1	1	1	0	1	1	1	1	1	0	1	0	1	0	1	1	1	1	0	0
Anoxybacillus flavithermus WK1	Bacteria	Firmicutes	Bacillales	0	1	0	0	0	0	0	0	0	0	0	0	0	0	0	0	0	0	1	1	0	1	1	1	1	1	0	1	0	1	1	1	0	1	1	0	0
Anoxybacillus gonensis strain G2	Bacteria	Firmicutes	Bacillales	0	1	0	0	0	0	0	0	0	0	0	0	0	0	0	0	0	0	1	1	0	1	1	1	1	1	0	1	0	1	1	1	0	1	1	0	0
Anaplasma marginale str. St. Maries	Bacteria	Proteobacteria	Alphaproteobacteria	0	0	0	0	0	0	0	0	0	0	0	0	0	0	0	0	0	0	1	0	0	1	1	1	0	0	0	0	0	0	0	0	1	1	0	0	0
Anaplasma marginale str. Florida	Bacteria	Proteobacteria	Alphaproteobacteria	0	0	0	0	0	0	0	0	0	0	0	0	0	0	0	0	0	0	1	0	0	1	1	0	0	0	0	0	0	0	0	0	1	1	0	0	0
Anaerobaculum mobile DSM 13181	Bacteria	Synergistetes	Synergistia	0	1	0	0	0	0	0	0	0	0	1	0	0	0	0	0	0	0	1	0	0	1	0	1	0	0	0	0	0	1	0	1	1	1	1	0	0
Anaplasma phagocytophilum HZ	Bacteria	Proteobacteria	Alphaproteobacteria	0	0	0	0	0	0	0	0	0	0	0	0	0	0	0	0	0	0	1	0	0	1	1	1	0	0	0	0	0	0	0	0	1	1	0	0	0
Anaplasma phagocytophilum str. HZ2	Bacteria	Proteobacteria	Alphaproteobacteria	0	0	0	0	0	0	0	0	0	0	0	0	0	0	0	0	0	0	1	0	0	1	1	1	0	0	0	0	0	0	0	0	1	1	0	0	0
Anaplasma phagocytophilum str. JM	Bacteria	Proteobacteria	Alphaproteobacteria	0	0	0	0	0	0	0	0	0	0	0	0	0	0	0	0	0	0	1	0	0	1	1	1	0	0	0	0	0	0	0	0	1	1	0	0	0
Anaplasma phagocytophilum str. Norway variant2	Bacteria	Proteobacteria	Alphaproteobacteria	0	0	0	0	0	0	0	0	0	0	0	0	0	0	0	0	0	0	1	0	0	1	1	1	0	0	0	0	0	0	0	0	1	1	0	0	0
Anaerococcus prevotii DSM 20548	Bacteria	Firmicutes	Tissierellia	0	0	0	0	0	0	0	0	0	0	0	0	0	0	0	0	0	0	1	1	0	1	1	1	1	1	0	0	0	1	0	1	1	1	1	0	0
Aneurinibacillus sp. XH2	Bacteria	Firmicutes	Bacillales	0	1	0	0	0	0	0	0	0	0	0	0	0	0	0	0	0	0	1	1	0	1	1	1	1	1	0	0	0	1	1	1	0	1	1	0	0
Anoxybacillus sp. B2M1	Bacteria	Firmicutes	Bacillales	0	1	0	0	0	0	0	0	0	0	0	0	0	0	0	0	0	0	0	1	0	1	1	1	1	1	0	1	0	1	1	1	0	1	1	0	0
Anoxybacillus sp. B7M1	Bacteria	Firmicutes	Bacillales	0	1	0	0	0	0	0	0	0	0	0	0	0	0	0	0	0	0	0	1	0	1	1	1	1	1	0	1	0	1	1	1	0	1	1	0	0
Anabaena sp. wa102 strain WA102	Bacteria	Cyanobacteria	Nostocales	0	0	0	1	0	0	0	0	0	0	1	0	0	0	0	0	0	0	1	1	0	1	1	1	1	0	0	1	0	1	0	1	1	1	0	0	0
Anaeromyxobacter sp. Fw109-5	Bacteria	Proteobacteria	Deltaproteobacteria	0	0	0	0	0	0	0	0	0	0	0	0	0	0	0	0	0	1	1	1	0	1	1	1	1	1	0	0	0	1	0	1	1	1	1	0	0
Anaeromyxobacter sp. K	Bacteria	Proteobacteria	Deltaproteobacteria	0	0	0	0	1	0	0	0	0	0	0	0	0	0	0	0	0	1	1	1	0	1	1	1	1	1	0	1	0	1	0	1	1	1	1	0	0
Anabaena sp. 90 chromosome chANA01	Bacteria	Cyanobacteria	Nostocales	0	0	0	1	0	0	0	0	0	0	0	0	0	0	0	0	0	0	1	1	0	1	1	1	1	0	0	1	0	1	0	1	1	1	0	0	0
Anaerolinea thermophila UNI-1 DNA	Bacteria	Chloroflexi	Anaerolineae	0	0	1	0	0	0	0	0	0	1	1	0	0	0	0	0	0	0	1	1	0	1	1	1	0	1	0	1	0	1	0	1	1	1	0	0	0
Aquifex aeolicus VF5 chromosome	Bacteria	Aquificae	Aquificales	0	1	0	0	0	0	0	0	0	0	1	0	0	0	0	0	0	0	1	0	0	1	1	1	0	0	0	1	0	0	0	1	0	0	0	0	0
Arthrobacter alpinus strain R3.8	Bacteria	Actinobacteria	Micrococcales	0	0	0	0	0	0	0	0	0	0	0	0	0	0	0	0	0	0	1	1	0	1	0	1	0	1	0	1	0	1	0	1	1	1	0	1	0
Arthrobacter alpinus strain ERGS4:06	Bacteria	Actinobacteria	Micrococcales	0	0	0	0	0	0	0	0	0	0	0	0	0	0	0	0	0	0	1	1	0	1	0	1	1	1	0	0	0	1	0	1	1	0	0	1	0
Azoarcus aromaticum EbN1 complete genome.	Bacteria	Proteobacteria	Betaproteobacteria	0	0	1	0	0	0	0	0	0	0	0	0	0	0	1	0	0	0	1	0	0	1	1	1	1	1	0	1	0	1	0	1	1	1	0	0	1
Arcobacter butzleri RM4018	Bacteria	Proteobacteria	Epsilonproteobacteria	0	0	0	0	0	0	0	0	0	0	0	0	0	0	0	0	0	0	1	0	0	0	1	1	0	0	0	0	0	0	0	1	1	1	1	0	0
Arcobacter butzleri 7h1h	Bacteria	Proteobacteria	Epsilonproteobacteria	0	0	0	0	0	0	0	0	0	0	0	0	0	0	0	0	0	0	1	0	0	0	1	1	0	0	0	1	0	0	0	1	1	1	1	0	0
Arcobacter butzleri ED-1 DNA	Bacteria	Proteobacteria	Epsilonproteobacteria	0	0	0	0	0	0	0	0	0	0	0	0	0	0	0	0	0	0	1	0	0	0	1	1	0	0	0	0	0	0	0	1	1	1	1	0	0
Archaeoglobus fulgidus DSM 4304	Archaea	Euryarchaeota	Archaeoglobi	1	0	0	0	0	0	0	0	0	0	1	0	0	0	0	0	0	1	0	0	0	0	0	0	0	0	0	0	0	0	0	1	0	0	0	0	0
Archaeoglobus fulgidus DSM 8774	Archaea	Euryarchaeota	Archaeoglobi	1	0	0	0	0	0	0	0	0	0	1	0	1	0	0	0	0	1	0	0	0	0	0	0	0	0	0	0	0	0	0	1	0	0	0	0	0
Archangium gephyra strain DSM 2261	Bacteria	Proteobacteria	Deltaproteobacteria	0	0	0	0	0	0	0	0	0	0	0	0	0	0	0	0	0	1	1	1	0	1	1	1	1	1	0	1	0	1	0	1	1	1	1	0	0
Arcanobacterium haemolyticum DSM 20595	Bacteria	Actinobacteria	Actinomycetales	0	0	0	0	1	0	0	0	0	0	0	0	0	0	0	0	0	0	1	1	0	1	0	1	0	1	0	0	0	1	0	1	1	1	0	1	0
Arcobacter nitrofigilis DSM 7299	Bacteria	Proteobacteria	Epsilonproteobacteria	0	1	0	0	0	0	0	0	0	0	0	0	0	0	0	0	0	0	1	0	0	0	1	1	1	0	0	0	0	0	0	1	1	1	1	0	0
Archaeoglobus profundus DSM 5631	Archaea	Euryarchaeota	Archaeoglobi	0	0	0	0	0	0	0	0	0	0	0	0	0	0	0	0	0	0	0	0	0	0	0	0	0	0	0	0	0	0	0	1	0	0	0	0	0
Arthrobacter sp. Rue61a	Bacteria	Actinobacteria	Micrococcales	0	0	0	0	0	0	0	0	0	0	0	0	0	0	0	0	0	1	1	1	0	1	0	1	1	1	0	0	0	1	0	1	1	1	0	1	0
Arthrobacter sp. PAMC25486	Bacteria	Actinobacteria	Micrococcales	0	0	0	0	0	0	0	0	0	0	0	0	0	0	0	0	0	1	1	1	0	1	0	1	0	1	0	1	0	1	0	1	1	1	0	1	0
Arthrobacter sp. IHBB 11108	Bacteria	Actinobacteria	Micrococcales	0	0	0	0	0	0	0	0	0	0	0	0	0	0	0	0	0	0	1	1	0	1	0	1	0	1	0	0	0	1	0	1	1	1	0	1	0
Arthrobacter sp. YC-RL1	Bacteria	Actinobacteria	Micrococcales	0	0	0	0	0	0	0	0	0	0	0	0	0	0	0	0	0	1	1	1	0	1	0	0	1	1	0	1	0	1	0	1	1	1	0	1	0
Arsenicicoccus sp. oral taxon 190	Bacteria	Actinobacteria	Micrococcales	0	0	0	0	0	0	0	0	0	0	0	0	0	0	0	0	0	1	1	1	0	1	0	1	1	1	0	1	0	1	0	1	1	1	0	1	0
Arthrobacter sp. LS16	Bacteria	Actinobacteria	Micrococcales	0	0	0	0	0	0	0	0	0	0	0	0	0	0	0	0	0	1	1	1	0	1	0	0	1	1	0	1	0	1	0	1	1	1	0	1	0
Arthrobacter sp. ERGS1:01	Bacteria	Actinobacteria	Micrococcales	0	0	0	0	0	0	0	0	0	0	0	0	0	0	0	0	0	0	1	1	0	1	0	1	1	1	0	0	0	1	0	1	1	1	0	1	0
Arthrobacter sp. ATCC 21022	Bacteria	Actinobacteria	Micrococcales	0	0	0	0	0	0	0	0	0	0	0	0	0	0	0	0	0	1	1	1	0	1	0	1	1	1	0	0	0	1	0	1	1	1	0	1	0
Arthrobacter sp. U41	Bacteria	Actinobacteria	Micrococcales	0	0	0	0	0	0	0	0	0	0	0	0	0	0	0	0	0	1	1	1	0	1	0	1	1	1	0	0	0	1	0	1	1	1	0	1	0
Arachidicoccus sp. BS20	Bacteria	Bacteroidetes	Chitinophagia	0	0	0	0	0	0	0	0	0	0	0	0	0	0	0	0	0	0	1	1	0	1	1	1	1	1	0	0	0	0	0	0	1	1	0	0	0
Arthrobacter sp. FB24	Bacteria	Actinobacteria	Micrococcales	0	0	0	0	0	0	0	0	0	0	0	0	0	0	0	0	0	1	1	1	0	1	0	1	1	1	0	0	0	1	0	1	1	1	0	1	0
Arthrobacter sp. A3	Bacteria	Actinobacteria	Micrococcales	0	0	0	0	0	0	0	0	0	0	0	0	0	0	0	0	0	0	1	1	0	1	0	1	1	1	0	0	0	1	0	1	1	1	0	1	0
Arcobacter sp. L DNA	Bacteria	Proteobacteria	Epsilonproteobacteria	0	1	0	0	0	0	0	0	0	0	0	0	0	0	0	0	0	0	1	0	0	0	1	1	1	0	0	1	0	0	0	1	1	1	1	0	0
Archaeoglobus sulfaticallidus PM70-1	Archaea	Euryarchaeota	Archaeoglobi	0	0	0	0	0	0	0	0	0	0	0	0	0	0	0	0	0	1	0	0	0	0	0	0	0	0	0	0	0	0	0	1	0	0	0	0	0
Arsenophonus symbiont of Lipoptena fortisetosa strain CB	Bacteria	Proteobacteria	Gammaproteobacteria	0	0	0	0	0	0	0	0	0	0	0	0	0	0	0	0	0	0	0	0	0	0	0	0	0	0	1	0	0	0	0	0	0	0	0	0	1
Archaeoglobus veneficus SNP6	Archaea	Euryarchaeota	Archaeoglobi	0	1	0	0	0	0	0	0	0	0	0	0	0	0	0	0	0	1	0	0	0	0	0	0	0	0	0	0	0	0	0	1	0	0	0	0	0
Asaia bogorensis NBRC 16594 DNA	Bacteria	Proteobacteria	Alphaproteobacteria	0	0	0	0	0	0	0	0	0	0	0	0	0	0	0	0	0	0	1	0	0	1	1	1	1	1	0	0	0	1	0	1	1	1	1	0	0
Asticcacaulis excentricus CB 48 chromosome 1	Bacteria	Proteobacteria	Alphaproteobacteria	0	0	0	0	0	0	0	0	0	0	0	0	0	0	0	0	0	1	1	1	0	1	1	1	1	0	0	0	0	1	0	1	1	1	1	0	0
Aster yellows witches'-broom phytoplasma AYWB	Bacteria	Tenericutes	Mollicutes	0	0	0	0	0	0	0	0	0	0	0	0	0	0	0	0	0	0	0	0	0	0	0	0	0	0	0	0	0	0	0	0	0	0	0	0	0
Atopobium parvulum DSM 20469	Bacteria	Actinobacteria	Coriobacteriia	0	0	0	0	0	0	0	0	0	0	0	0	0	0	0	0	0	0	1	1	0	1	1	1	1	1	0	0	0	1	0	1	1	1	0	0	0
Aureimonas sp. AU20	Bacteria	Proteobacteria	Alphaproteobacteria	0	0	0	0	0	0	0	0	0	0	0	0	0	0	0	0	0	0	1	1	0	1	1	1	1	1	0	0	0	1	0	1	1	1	1	0	0
Azospirillum brasilense strain Az39	Bacteria	Proteobacteria	Alphaproteobacteria	0	0	0	0	0	0	0	0	0	0	0	0	0	0	0	0	0	0	1	0	0	1	1	1	1	1	0	0	0	1	0	1	1	1	1	0	0
Azospirillum brasilense strain Sp7	Bacteria	Proteobacteria	Alphaproteobacteria	0	0	1	0	0	0	0	0	0	0	0	0	0	0	0	0	0	0	1	0	0	1	1	1	1	1	0	0	0	1	0	1	1	1	1	0	1
Azorhizobium caulinodans ORS 571 DNA	Bacteria	Proteobacteria	Alphaproteobacteria	0	0	0	0	0	0	0	0	0	0	0	0	0	0	0	0	0	1	1	1	0	1	1	1	1	0	0	0	0	1	0	1	1	1	1	0	0
Azotobacter chroococcum NCIMB 8003	Bacteria	Proteobacteria	Gammaproteobacteria	0	0	0	0	1	0	0	0	0	0	0	0	0	1	0	0	0	0	1	1	0	1	1	1	1	1	1	1	0	1	0	1	1	1	0	0	1
Azospirillum humicireducens strain SgZ-5	Bacteria	Proteobacteria	Alphaproteobacteria	0	0	0	0	0	0	0	0	1	0	0	0	0	0	0	0	0	0	1	0	0	1	1	1	1	1	0	0	0	1	0	1	1	1	1	0	0
Azospirillum lipoferum 4B main chromosome	Bacteria	Proteobacteria	Alphaproteobacteria	0	0	0	0	0	0	0	0	0	0	1	0	0	1	0	0	0	0	1	0	0	1	1	1	1	1	0	1	0	1	0	1	0	1	1	0	0
Azoarcus olearius strain DQS4	Bacteria	Proteobacteria	Betaproteobacteria	0	0	0	0	0	0	0	0	0	0	0	0	0	0	0	0	0	1	1	0	0	1	1	1	1	1	0	1	0	1	0	1	1	1	0	0	1
Azospirillum sp. B510 DNA	Bacteria	Proteobacteria	Alphaproteobacteria	0	0	0	0	0	0	0	0	0	0	0	0	0	1	0	0	0	0	1	0	0	1	1	1	1	1	0	1	0	1	0	1	1	1	1	0	0
Azoarcus sp. CIB	Bacteria	Proteobacteria	Betaproteobacteria	0	0	0	0	0	0	0	0	0	0	0	0	0	0	0	0	0	0	1	0	0	1	1	1	1	1	0	1	0	1	0	1	1	1	0	0	1
Azoarcus sp. BH72	Bacteria	Proteobacteria	Betaproteobacteria	0	0	0	0	0	0	0	0	0	0	0	0	0	0	0	0	0	1	1	0	0	1	1	1	1	1	0	1	0	1	0	1	1	1	0	0	1
Azoarcus sp. KH32C DNA	Bacteria	Proteobacteria	Betaproteobacteria	0	0	0	0	0	0	0	0	0	0	0	0	0	0	0	0	0	1	1	0	0	1	1	1	1	1	0	0	0	1	0	1	1	1	0	0	1
Azospirillum thiophilum strain BV-S chromosome 1	Bacteria	Proteobacteria	Alphaproteobacteria	0	0	0	0	0	0	0	0	0	0	0	0	0	0	0	0	0	0	1	0	0	1	1	1	1	1	0	0	0	1	0	1	1	1	1	0	0
Azotobacter vinelandii DJ	Bacteria	Proteobacteria	Gammaproteobacteria	0	0	1	0	1	0	0	0	0	0	0	0	0	0	0	0	0	0	1	1	0	1	1	1	1	1	1	1	0	1	0	1	1	1	0	0	1
Azotobacter vinelandii CA	Bacteria	Proteobacteria	Gammaproteobacteria	0	0	1	0	1	0	0	0	0	0	0	0	0	0	0	0	0	0	1	1	0	1	1	1	1	1	1	1	0	1	0	1	1	1	0	0	1
Azotobacter vinelandii CA6	Bacteria	Proteobacteria	Gammaproteobacteria	0	0	1	0	1	0	0	0	0	0	0	0	0	0	0	0	0	0	1	1	0	1	1	1	1	1	1	1	0	1	0	1	1	1	0	0	1
Bacillus amyloliquefaciens TA208	Bacteria	Firmicutes	Bacillales	0	0	0	0	0	0	0	0	0	0	0	0	0	0	0	0	0	1	1	1	0	1	1	1	1	1	0	1	1	1	1	1	0	1	1	0	0
Bacillus amyloliquefaciens DSM7 complete genome.	Bacteria	Firmicutes	Bacillales	0	0	0	0	0	0	0	0	0	0	0	0	0	0	0	0	0	1	1	1	0	1	1	1	1	1	0	1	1	1	1	1	0	1	1	0	0
Bacillus amyloliquefaciens LL3	Bacteria	Firmicutes	Bacillales	0	0	0	0	0	0	0	0	0	0	0	0	0	0	0	0	0	1	1	1	0	1	1	1	1	1	0	1	1	1	1	1	0	1	1	0	0
Bacillus amyloliquefaciens XH7	Bacteria	Firmicutes	Bacillales	0	0	0	0	0	0	0	0	0	0	0	0	0	0	0	0	0	1	1	1	0	1	1	1	1	1	0	1	1	1	1	1	0	1	1	0	0
Bacillus amyloliquefaciens IT-45	Bacteria	Firmicutes	Bacillales	0	0	0	0	0	0	0	0	0	0	0	0	0	0	0	0	0	1	1	1	0	1	1	1	1	1	0	1	1	1	1	1	0	1	1	0	0
Bacillus amyloliquefaciens Y2	Bacteria	Firmicutes	Bacillales	0	0	0	0	0	0	0	0	0	0	0	0	0	0	0	0	0	1	1	1	0	1	1	1	1	1	0	1	1	1	1	1	0	1	1	0	0
Bacillus amyloliquefaciens CC178	Bacteria	Firmicutes	Bacillales	0	0	0	0	0	0	0	0	0	0	0	0	0	0	0	0	0	1	1	1	0	1	1	1	1	1	0	1	1	1	1	1	0	1	1	0	0
Bacillus amyloliquefaciens LFB112	Bacteria	Firmicutes	Bacillales	0	0	0	0	0	0	0	0	0	0	0	0	0	0	0	0	0	1	1	1	0	1	1	1	1	1	0	1	1	1	1	1	0	1	1	0	0
Bacillus amyloliquefaciens strain L-H15	Bacteria	Firmicutes	Bacillales	0	0	0	0	0	0	0	0	0	0	0	0	0	0	0	0	0	1	1	1	0	1	1	1	1	1	0	1	1	1	1	1	0	1	1	0	0
Bacillus amyloliquefaciens subsp. amyloliquefaciens KHG19	Bacteria	Firmicutes	Bacillales	0	0	0	0	0	0	0	0	0	0	0	0	0	0	0	0	0	1	1	1	0	1	1	1	1	1	0	1	1	1	1	1	0	1	1	0	0
Bacillus amyloliquefaciens strain L-S60	Bacteria	Firmicutes	Bacillales	0	0	0	0	0	0	0	0	0	0	0	0	0	0	0	0	0	1	1	1	0	1	1	1	1	1	0	1	1	1	1	1	0	1	1	0	0
Bacillus amyloliquefaciens strain MBE1283	Bacteria	Firmicutes	Bacillales	0	0	0	0	0	0	0	0	0	0	0	0	0	0	0	0	0	1	1	1	0	1	1	1	1	1	0	1	1	1	1	1	0	1	1	0	0
Bacillus amyloliquefaciens strain S499	Bacteria	Firmicutes	Bacillales	0	0	0	0	0	0	0	0	0	0	0	0	0	0	0	0	0	1	1	1	0	1	1	1	1	1	0	1	1	1	1	1	0	1	1	0	0
Bacillus amyloliquefaciens UMAF6639	Bacteria	Firmicutes	Bacillales	0	0	0	0	0	0	0	0	0	0	0	0	0	0	0	0	0	1	1	1	0	1	1	1	1	1	0	1	1	1	1	1	0	1	1	0	0
Bacillus amyloliquefaciens UMAF6614	Bacteria	Firmicutes	Bacillales	0	0	0	0	0	0	0	0	0	0	0	0	0	0	0	0	0	1	1	1	0	1	1	1	1	1	0	1	1	1	1	1	0	1	1	0	0
Bacillus amyloliquefaciens strain B15	Bacteria	Firmicutes	Bacillales	0	0	0	0	0	0	0	0	0	0	0	0	0	0	0	0	0	1	1	1	0	1	1	1	1	1	0	1	1	1	1	1	0	1	1	0	0
Bacillus amyloliquefaciens strain RD7-7	Bacteria	Firmicutes	Bacillales	0	0	0	0	0	0	0	0	0	0	0	0	0	0	0	0	0	1	1	1	0	1	1	1	1	1	0	1	1	1	1	1	0	1	1	0	0
Candidatus Bartonella ancashi strain 20.00	Bacteria	Proteobacteria	Alphaproteobacteria	0	0	0	0	0	0	0	0	0	0	0	0	0	0	0	0	0	0	1	0	0	1	1	1	0	0	0	0	0	0	0	1	1	1	1	0	0
Bacillus anthracis str. Ames chromosome	Bacteria	Firmicutes	Bacillales	0	0	0	0	0	0	0	0	0	0	0	0	0	0	0	0	0	1	0	1	0	1	1	1	1	1	0	0	1	1	1	1	0	1	1	0	0
Bacillus anthracis str. Sterne chromosome	Bacteria	Firmicutes	Bacillales	0	0	0	0	0	0	0	0	0	0	0	0	0	0	0	0	0	1	0	1	0	1	1	1	1	1	0	0	1	1	1	1	0	1	1	0	0
Bacillus anthracis str. 'Ames Ancestor'	Bacteria	Firmicutes	Bacillales	0	0	0	0	0	0	0	0	0	0	0	0	0	0	0	0	0	1	0	1	0	1	1	1	1	1	0	0	1	1	1	1	0	1	1	0	0
Bacillus anthracis str. CDC 684	Bacteria	Firmicutes	Bacillales	0	0	0	0	0	0	0	0	0	0	0	0	0	0	0	0	0	1	0	1	0	1	1	1	1	1	0	0	1	1	1	1	0	1	1	0	0
Bacillus anthracis str. A0248	Bacteria	Firmicutes	Bacillales	0	0	0	0	0	0	0	0	0	0	0	0	0	0	0	0	0	1	0	1	0	1	1	1	1	1	0	0	1	1	1	1	0	1	1	0	0
Bacillus anthracis str. H9401	Bacteria	Firmicutes	Bacillales	0	0	0	0	0	0	0	0	0	0	0	0	0	0	0	0	0	1	0	1	0	1	1	1	1	1	0	0	1	1	1	1	0	1	1	0	0
Bacillus anthracis str. A16R	Bacteria	Firmicutes	Bacillales	0	0	0	0	0	0	0	0	0	0	0	0	0	0	0	0	0	1	0	1	0	1	1	1	1	1	0	0	1	1	1	1	0	1	1	0	0
Bacillus anthracis str. SVA11	Bacteria	Firmicutes	Bacillales	0	0	0	0	0	0	0	0	0	0	0	0	0	0	0	0	0	1	0	1	0	1	1	1	1	1	0	0	1	1	1	1	0	1	1	0	0
Bacillus anthracis strain HYU01	Bacteria	Firmicutes	Bacillales	0	0	0	0	0	0	0	0	0	0	0	0	0	0	0	0	0	1	0	1	0	1	1	1	1	1	0	0	1	1	1	1	0	1	1	0	0
Bacillus anthracis strain 2000031021	Bacteria	Firmicutes	Bacillales	0	0	0	0	0	0	0	0	0	0	0	0	0	0	0	0	0	1	0	1	0	1	1	1	1	1	0	0	1	1	1	1	0	1	1	0	0
Bacillus anthracis str. Vollum	Bacteria	Firmicutes	Bacillales	0	0	0	0	0	0	0	0	0	0	0	0	0	0	0	0	0	1	0	1	0	1	1	1	1	1	0	0	1	1	1	1	0	1	1	0	0
Bacillus anthracis strain Ames A0462	Bacteria	Firmicutes	Bacillales	0	0	0	0	0	0	0	0	0	0	0	0	0	0	0	0	0	1	0	1	0	1	1	1	1	1	0	0	1	1	1	1	0	1	1	0	0
Bacillus anthracis strain PAK-1	Bacteria	Firmicutes	Bacillales	0	0	0	0	0	0	0	0	0	0	0	0	0	0	0	0	0	1	0	1	0	1	1	1	1	1	0	0	1	1	1	1	0	1	1	0	0
Bacillus anthracis strain Vollum 1B	Bacteria	Firmicutes	Bacillales	0	0	0	0	0	0	0	0	0	0	0	0	0	0	0	0	0	1	0	1	0	1	1	1	1	1	0	0	1	1	1	1	0	1	1	0	0
Bacillus anthracis strain K3	Bacteria	Firmicutes	Bacillales	0	0	0	0	0	0	0	0	0	0	0	0	0	0	0	0	0	1	0	1	0	1	1	1	1	1	0	0	1	1	1	1	0	1	1	0	0
Bacillus anthracis strain Ohio ACB	Bacteria	Firmicutes	Bacillales	0	0	0	0	0	0	0	0	0	0	0	0	0	0	0	0	0	1	0	1	0	1	1	1	1	1	0	0	1	1	1	1	0	1	1	0	0
Bacillus anthracis strain SK-102	Bacteria	Firmicutes	Bacillales	0	0	0	0	0	0	0	0	0	0	0	0	0	0	0	0	0	1	0	1	0	1	1	1	1	1	0	0	1	1	1	1	0	1	1	0	0
Bacillus anthracis strain Pasteur	Bacteria	Firmicutes	Bacillales	0	0	0	0	0	0	0	0	0	0	0	0	0	0	0	0	0	1	0	1	0	1	1	1	1	1	0	0	1	1	1	1	0	1	1	0	0
Bacillus anthracis str. Sterne	Bacteria	Firmicutes	Bacillales	0	0	0	0	0	0	0	0	0	0	0	0	0	0	0	0	0	1	0	1	0	1	1	1	1	1	0	0	1	1	1	1	0	1	1	0	0
Bacillus anthracis strain BA1015	Bacteria	Firmicutes	Bacillales	0	0	0	0	0	0	0	0	0	0	0	0	0	0	0	0	0	1	0	1	0	1	1	1	1	1	0	0	1	1	1	1	0	1	1	0	0
Bacillus anthracis strain BA1035	Bacteria	Firmicutes	Bacillales	0	0	0	0	0	0	0	0	0	0	0	0	0	0	0	0	0	1	0	1	0	1	1	1	1	1	0	0	1	1	1	1	0	1	1	0	0
Bacillus anthracis strain RA3	Bacteria	Firmicutes	Bacillales	0	0	0	0	0	0	0	0	0	0	0	0	0	0	0	0	0	1	0	1	0	1	1	1	1	1	0	0	1	1	1	1	0	1	1	0	0
Bacillus anthracis str. V770-NP-1R	Bacteria	Firmicutes	Bacillales	0	0	0	0	0	0	0	0	0	0	0	0	0	0	0	0	0	1	0	1	0	1	1	1	1	1	0	0	1	1	1	1	0	1	1	0	0
Bacillus anthracis strain 2002013094	Bacteria	Firmicutes	Bacillales	0	0	0	0	0	0	0	0	0	0	0	0	0	0	0	0	0	1	0	1	0	1	1	1	1	1	0	0	1	1	1	1	0	1	1	0	0
Bacillus anthracis strain Ames_BA1004	Bacteria	Firmicutes	Bacillales	0	0	0	0	0	0	0	0	0	0	0	0	0	0	0	0	0	1	0	1	0	1	1	1	1	1	0	0	1	1	1	1	0	1	1	0	0
Bacillus anthracis strain Canadian_bison	Bacteria	Firmicutes	Bacillales	0	0	0	0	0	0	0	0	0	0	0	0	0	0	0	0	0	1	0	1	0	1	1	1	1	1	0	0	1	1	1	1	0	1	1	0	0
Bacillus anthracis str. Turkey32	Bacteria	Firmicutes	Bacillales	0	0	0	0	0	0	0	0	0	0	0	0	0	0	0	0	0	1	0	1	0	1	1	1	1	1	0	0	1	1	1	1	0	1	1	0	0
Bacillus anthracis strain A1144	Bacteria	Firmicutes	Bacillales	0	0	0	0	0	0	0	0	0	0	0	0	0	0	0	0	0	1	0	1	0	1	1	1	1	1	0	0	1	1	1	1	0	1	1	0	0
Bacillus anthracis strain Stendal	Bacteria	Firmicutes	Bacillales	0	0	0	0	0	0	0	0	0	0	0	0	0	0	0	0	0	1	0	1	0	1	1	1	1	1	0	0	1	1	1	1	0	1	1	0	0
Bacillus anthracis strain Tangail-1	Bacteria	Firmicutes	Bacillales	0	0	0	0	0	0	0	0	0	0	0	0	0	0	0	0	0	1	0	1	0	1	1	1	1	1	0	0	1	1	1	1	0	1	1	0	0
Bacillus anthracis strain Parent2	Bacteria	Firmicutes	Bacillales	0	0	0	0	0	0	0	0	0	0	0	0	0	0	0	0	0	1	0	1	0	1	1	1	1	1	0	0	1	1	1	1	0	1	1	0	0
Bacillus anthracis strain Parent1	Bacteria	Firmicutes	Bacillales	0	0	0	0	0	0	0	0	0	0	0	0	0	0	0	0	0	1	0	1	0	1	1	1	1	1	0	0	1	1	1	1	0	1	1	0	0
Bacillus anthracis strain PR01	Bacteria	Firmicutes	Bacillales	0	0	0	0	0	0	0	0	0	0	0	0	0	0	0	0	0	1	0	1	0	1	1	1	1	1	0	0	1	1	1	1	0	1	1	0	0
Bacillus anthracis strain PR02	Bacteria	Firmicutes	Bacillales	0	0	0	0	0	0	0	0	0	0	0	0	0	0	0	0	0	1	0	1	0	1	1	1	1	1	0	0	1	1	1	1	0	1	1	0	0
Bacillus anthracis strain PR05	Bacteria	Firmicutes	Bacillales	0	0	0	0	0	0	0	0	0	0	0	0	0	0	0	0	0	1	0	1	0	1	1	1	1	1	0	0	1	1	1	1	0	1	1	0	0
Bacillus anthracis strain PR06	Bacteria	Firmicutes	Bacillales	0	0	0	0	0	0	0	0	0	0	0	0	0	0	0	0	0	1	0	1	0	1	1	1	1	1	0	0	1	1	1	1	0	1	1	0	0
Bacillus anthracis strain PR07	Bacteria	Firmicutes	Bacillales	0	0	0	0	0	0	0	0	0	0	0	0	0	0	0	0	0	1	0	1	0	1	1	1	1	1	0	0	1	1	1	1	0	1	1	0	0
Bacillus anthracis strain PR08	Bacteria	Firmicutes	Bacillales	0	0	0	0	0	0	0	0	0	0	0	0	0	0	0	0	0	1	0	1	0	1	1	1	1	1	0	0	1	1	1	1	0	1	1	0	0
Bacillus anthracis strain PR09-1	Bacteria	Firmicutes	Bacillales	0	0	0	0	0	0	0	0	0	0	0	0	0	0	0	0	0	1	0	1	0	1	1	1	1	1	0	0	1	1	1	1	0	1	1	0	0
Bacillus anthracis strain PR09-4	Bacteria	Firmicutes	Bacillales	0	0	0	0	0	0	0	0	0	0	0	0	0	0	0	0	0	1	0	1	0	1	1	1	1	1	0	0	1	1	1	1	0	1	1	0	0
Bacillus anthracis strain PR10-4	Bacteria	Firmicutes	Bacillales	0	0	0	0	0	0	0	0	0	0	0	0	0	0	0	0	0	1	0	1	0	1	1	1	1	1	0	0	1	1	1	1	0	1	1	0	0
Bacillus atrophaeus 1942	Bacteria	Firmicutes	Bacillales	0	0	0	0	0	0	0	0	0	0	0	0	0	0	0	0	0	1	1	1	0	1	1	1	1	1	0	1	1	1	1	1	0	1	1	0	0
Bacillus atrophaeus strain NRS 1221A	Bacteria	Firmicutes	Bacillales	0	0	0	0	0	0	0	0	0	0	0	0	0	0	0	0	0	1	1	1	0	1	1	1	1	1	0	1	1	1	1	1	0	1	1	0	0
Bartonella australis Aust/NH1	Bacteria	Proteobacteria	Alphaproteobacteria	0	0	0	0	0	0	0	0	0	0	0	0	0	0	0	0	0	0	1	0	0	1	1	1	0	0	0	0	0	1	0	1	1	1	1	0	0
Bacteroidales bacterium CF	Bacteria	Bacteroidetes	Bacteroidia	0	0	0	0	0	0	0	0	1	0	0	0	0	0	0	0	0	0	1	1	0	1	1	1	1	1	0	0	0	1	0	1	1	1	1	0	0
Bartonella bacilliformis KC583	Bacteria	Proteobacteria	Alphaproteobacteria	0	0	0	0	0	0	0	0	0	0	0	0	0	0	0	0	0	0	1	0	0	1	1	1	0	0	0	0	0	0	0	1	1	1	1	0	0
Bartonella bacilliformis strain ATCC:35685D-5	Bacteria	Proteobacteria	Alphaproteobacteria	0	0	0	0	0	0	0	0	0	0	0	0	0	0	0	0	0	0	1	0	0	1	1	1	0	0	0	0	0	0	0	1	1	1	1	0	0
Bacillus beveridgei strain MLTeJB	Bacteria	Firmicutes	Bacillales	0	0	0	0	0	0	0	0	0	0	0	0	0	0	0	0	0	0	1	0	0	1	1	1	1	1	0	0	1	1	1	1	0	1	1	0	0
Bacillus bombysepticus str. Wang	Bacteria	Firmicutes	Bacillales	0	0	0	0	0	0	0	0	0	0	0	0	0	0	0	0	0	1	0	1	0	1	1	1	1	1	0	0	1	1	1	1	0	1	1	0	0
Bacillus cereus ATCC 14579 chromosome	Bacteria	Firmicutes	Bacillales	0	0	0	0	0	0	0	0	0	0	0	0	0	0	0	0	0	1	1	1	0	1	1	1	1	1	0	0	1	1	1	1	0	1	1	0	0
Bacillus cereus ATCC 10987	Bacteria	Firmicutes	Bacillales	0	0	0	0	0	0	0	0	0	0	0	0	0	0	0	0	0	1	0	1	0	1	1	1	1	1	0	0	1	1	1	1	0	1	1	0	0
Bacillus cereus E33L	Bacteria	Firmicutes	Bacillales	0	0	0	0	0	0	0	0	0	0	0	0	0	0	0	0	0	1	0	1	0	1	1	1	1	1	0	0	1	1	1	1	0	1	1	0	0
Bacillus cereus Q1	Bacteria	Firmicutes	Bacillales	0	0	0	0	0	0	0	0	0	0	0	0	0	0	0	0	0	1	0	1	0	1	1	1	1	1	0	0	1	1	1	1	0	1	1	0	0
Bacillus cereus B4264	Bacteria	Firmicutes	Bacillales	0	0	0	0	0	0	0	0	0	0	0	0	0	0	0	0	0	1	1	1	0	1	1	1	1	1	0	0	1	1	1	1	0	1	1	0	0
Bacillus cereus AH187	Bacteria	Firmicutes	Bacillales	0	0	0	0	0	0	0	0	0	0	0	0	0	0	0	0	0	1	0	1	0	1	1	1	1	1	0	0	1	1	1	1	0	1	1	0	0
Bacillus cereus G9842	Bacteria	Firmicutes	Bacillales	0	0	0	0	0	0	0	0	0	0	0	0	0	0	0	0	0	1	1	1	0	1	1	1	1	1	0	0	1	1	1	1	0	1	1	0	0
Bacillus cereus AH820	Bacteria	Firmicutes	Bacillales	0	0	0	0	0	0	0	0	0	0	0	0	0	0	0	0	0	1	0	1	0	1	1	1	1	1	0	0	0	1	1	1	0	0	1	0	0
Bacillus cereus 03BB102	Bacteria	Firmicutes	Bacillales	0	0	0	0	0	0	0	0	0	0	0	0	0	0	0	0	0	1	1	1	0	1	1	1	1	1	0	0	1	1	1	1	0	1	1	0	0
Bacillus cereus biovar anthracis str. CI	Bacteria	Firmicutes	Bacillales	0	0	0	0	0	0	0	0	0	0	0	0	0	0	0	0	0	1	0	1	0	1	1	1	1	1	0	0	1	1	1	1	0	1	1	0	0
Bacillus cereus F837/76	Bacteria	Firmicutes	Bacillales	0	0	0	0	0	0	0	0	0	0	0	0	0	0	0	0	0	1	1	1	0	1	1	1	1	1	0	0	1	1	1	1	0	1	1	0	0
Bacillus cereus NC7401 genomic DNA	Bacteria	Firmicutes	Bacillales	0	0	0	0	0	0	0	0	0	0	0	0	0	0	0	0	0	1	0	1	0	1	1	1	1	1	0	0	1	1	1	1	0	1	1	0	0
Bacillus cereus FRI-35	Bacteria	Firmicutes	Bacillales	0	0	0	0	0	0	0	0	0	0	0	0	0	0	0	0	0	1	1	1	0	1	1	1	1	1	0	0	1	1	1	1	0	1	1	0	0
Bacillus cereus strain A1	Bacteria	Firmicutes	Bacillales	0	0	0	0	0	0	0	0	0	0	0	0	0	0	0	0	0	1	0	1	0	1	1	1	1	1	0	0	1	1	1	1	0	1	1	0	0
Bacillus cereus strain 03BB87	Bacteria	Firmicutes	Bacillales	0	0	0	0	0	0	0	0	0	0	0	0	0	0	0	0	0	1	1	1	0	1	1	1	1	1	0	0	1	1	1	1	0	1	1	0	0
Bacillus cereus D17	Bacteria	Firmicutes	Bacillales	0	0	0	0	0	0	0	0	0	0	0	0	0	0	0	0	0	1	0	1	0	1	1	1	1	1	0	0	1	1	1	1	0	1	1	0	0
Bacillus cereus 03BB102	Bacteria	Firmicutes	Bacillales	0	0	0	0	0	0	0	0	0	0	0	0	0	0	0	0	0	1	1	1	0	1	1	1	1	1	0	0	1	1	1	1	0	1	1	0	0
Bacillus cereus strain FM1	Bacteria	Firmicutes	Bacillales	0	0	0	0	0	0	0	0	0	0	0	0	0	0	0	0	0	1	1	1	0	1	1	1	1	1	0	0	1	1	1	1	0	1	1	0	0
Bacillus cereus strain 3a	Bacteria	Firmicutes	Bacillales	0	0	0	0	0	0	0	0	0	0	0	0	0	0	0	0	0	1	0	1	0	1	1	1	1	1	0	0	1	1	1	1	0	1	1	0	0
Bacillus cereus G9241	Bacteria	Firmicutes	Bacillales	0	0	0	0	0	0	0	0	0	0	0	0	0	0	0	0	0	1	1	1	0	1	1	1	1	1	0	0	1	1	1	1	0	1	1	0	0
Bacillus cereus ATCC 4342	Bacteria	Firmicutes	Bacillales	0	0	0	0	0	0	0	0	0	0	0	0	0	0	0	0	0	1	1	1	0	1	1	1	1	1	0	0	1	1	1	1	0	1	1	0	0
Bacillus cereus 03BB108	Bacteria	Firmicutes	Bacillales	0	0	0	0	0	0	0	0	0	0	0	0	0	0	0	0	0	1	0	1	0	1	1	1	1	1	0	0	1	1	1	1	0	1	1	0	0
Bacillus cereus E33L	Bacteria	Firmicutes	Bacillales	0	0	0	0	0	0	0	0	0	0	0	0	0	0	0	0	0	1	0	1	0	1	1	1	1	1	0	0	1	1	1	1	0	1	1	0	0
Bacillus cereus strain S2-8	Bacteria	Firmicutes	Bacillales	0	0	0	0	0	0	0	0	0	0	0	0	0	0	0	0	0	1	0	1	0	1	1	1	1	1	0	0	1	1	1	1	0	1	1	0	0
Bacillus cereus strain FORC_005	Bacteria	Firmicutes	Bacillales	0	0	0	0	0	0	0	0	0	0	0	0	0	0	0	0	0	1	1	1	0	1	1	1	1	1	0	0	1	1	1	1	0	1	1	0	0
Bacillus cereus strain NJ-W	Bacteria	Firmicutes	Bacillales	0	0	0	0	0	0	0	0	0	0	0	0	0	0	0	0	0	1	0	1	0	1	1	1	1	1	0	0	1	1	1	1	0	1	1	0	0
Bacillus cereus strain FORC_013	Bacteria	Firmicutes	Bacillales	0	0	0	0	0	0	0	0	0	0	0	0	0	0	0	0	0	1	1	1	0	1	1	1	1	1	0	0	1	1	1	1	0	1	1	0	0
Bacillus cereus strain CMCC P0021	Bacteria	Firmicutes	Bacillales	0	0	0	0	0	0	0	0	0	0	0	0	0	0	0	0	0	1	1	1	0	1	1	1	1	1	0	0	1	1	1	1	0	1	1	0	0
Bacillus cereus strain CMCC P0011	Bacteria	Firmicutes	Bacillales	0	0	0	0	0	0	0	0	0	0	0	0	0	0	0	0	0	1	1	1	0	1	1	1	1	1	0	0	1	1	1	1	0	1	1	0	0
Bacillus cereus strain HN001	Bacteria	Firmicutes	Bacillales	0	0	0	0	0	0	0	0	0	0	0	0	0	0	0	0	0	1	0	1	0	1	1	1	1	1	0	0	1	1	1	1	0	1	1	0	0
Bacillus cereus strain FORC_024	Bacteria	Firmicutes	Bacillales	0	0	0	0	0	0	0	0	0	0	0	0	0	0	0	0	0	1	1	1	0	1	1	1	1	1	0	0	1	1	1	1	0	1	1	0	0
Bacillus cellulosilyticus DSM 2522	Bacteria	Firmicutes	Bacillales	0	0	0	0	0	0	0	0	0	0	0	0	0	0	0	0	0	1	1	1	0	1	1	1	1	1	0	1	1	1	1	1	0	1	1	0	0
Bacteroides cellulosilyticus strain WH2	Bacteria	Bacteroidetes	Bacteroidia	0	0	0	0	0	0	0	0	0	0	0	0	0	0	0	0	0	0	1	1	0	1	1	1	1	1	0	0	0	1	0	1	1	1	1	0	0
Baumannia cicadellinicola str. Hc (Homalodisca coagulata)	Bacteria	Proteobacteria	Gammaproteobacteria	0	0	0	0	0	0	0	0	0	0	0	0	0	0	0	0	0	0	1	0	0	1	1	0	0	0	0	0	0	0	0	0	1	1	0	0	1
Bartonella clarridgeiae strain 73	Bacteria	Proteobacteria	Alphaproteobacteria	0	0	0	0	0	0	0	0	0	0	0	0	0	0	0	0	0	0	1	1	0	1	1	1	0	0	0	0	0	1	0	1	1	1	1	0	0
Bacillus clausii KSM-K16 DNA	Bacteria	Firmicutes	Bacillales	0	0	1	0	0	0	0	0	0	0	0	0	0	0	0	0	0	1	1	1	0	1	1	1	1	1	0	0	0	1	1	1	0	1	0	0	0
Bacillus clausii strain ENTPro	Bacteria	Firmicutes	Bacillales	0	0	0	0	0	0	0	0	0	0	0	0	0	0	0	0	0	1	1	1	0	1	1	1	1	1	0	0	0	1	1	1	0	1	0	0	0
Bacillus coagulans 36D1	Bacteria	Firmicutes	Bacillales	0	1	0	0	0	0	0	0	0	0	0	0	0	0	0	0	0	1	1	1	0	1	1	1	1	1	0	0	1	1	1	1	0	1	1	0	0
Bacillus coagulans 2-6	Bacteria	Firmicutes	Bacillales	0	1	0	0	0	0	0	0	0	0	0	0	0	0	0	0	0	1	1	1	0	1	1	1	1	1	0	0	1	1	1	1	0	1	1	0	0
Bacillus coagulans DSM 1 = ATCC 7050	Bacteria	Firmicutes	Bacillales	0	0	1	0	0	0	0	0	0	0	0	0	0	0	1	0	0	1	1	1	0	1	1	1	1	1	0	0	1	1	1	1	0	1	1	0	0
Bacillus coagulans strain HM-08	Bacteria	Firmicutes	Bacillales	0	0	1	0	0	0	0	0	0	0	0	0	0	0	0	0	0	1	1	1	0	1	1	1	1	1	0	0	1	1	1	1	0	1	1	0	0
Bacillus coagulans strain S-lac	Bacteria	Firmicutes	Bacillales	0	0	1	0	0	0	0	0	0	0	0	0	0	0	0	0	0	1	1	1	0	1	1	1	1	1	0	0	1	1	1	1	0	1	1	0	0
Bacillus cytotoxicus NVH 391-98	Bacteria	Firmicutes	Bacillales	0	1	0	0	0	0	0	0	0	0	0	0	0	0	0	0	0	0	1	1	0	1	1	1	1	1	0	0	1	1	1	1	0	1	1	0	0
Bacteroides dorei CL03T12C01	Bacteria	Bacteroidetes	Bacteroidia	0	0	1	0	0	0	0	0	0	0	0	0	0	0	0	0	0	0	1	1	0	1	1	1	1	1	0	1	0	0	0	1	1	1	1	0	0
Bacillus endophyticus strain Hbe603	Bacteria	Firmicutes	Bacillales	0	0	0	0	0	0	0	0	0	0	0	0	0	0	0	0	0	1	1	1	0	1	1	1	1	1	0	1	0	1	1	1	0	1	1	0	0
Bacteroides fragilis YCH46 DNA	Bacteria	Bacteroidetes	Bacteroidia	0	0	0	0	0	0	0	0	0	0	0	0	0	0	0	0	0	0	1	1	0	1	1	1	1	1	0	1	0	1	0	1	1	1	1	0	0
Bacteroides fragilis NCTC 9343	Bacteria	Bacteroidetes	Bacteroidia	0	0	0	0	0	0	0	0	1	0	0	0	0	0	0	0	0	0	1	1	0	1	1	1	1	1	0	1	0	1	0	1	1	1	1	0	0
Bacteroides fragilis 638R genome.	Bacteria	Bacteroidetes	Bacteroidia	0	0	0	0	0	0	0	0	1	0	0	0	0	0	0	0	0	0	1	1	0	1	1	1	1	1	0	1	0	1	0	1	1	1	1	0	0
Bacteroides fragilis strain BOB25	Bacteria	Bacteroidetes	Bacteroidia	0	0	0	0	0	0	0	0	0	0	0	0	0	0	0	0	0	0	1	1	0	1	1	1	1	1	0	1	0	1	0	1	1	1	1	0	0
Bacteroides fragilis genome assembly BFBE1.1	Bacteria	Bacteroidetes	Bacteroidia	0	0	0	0	0	0	0	0	1	0	0	0	0	0	0	0	0	0	1	1	0	1	1	1	1	1	0	1	0	1	0	1	1	1	1	0	0
Bacteroides fragilis strain S14	Bacteria	Bacteroidetes	Bacteroidia	0	0	0	0	0	0	0	0	1	0	1	0	0	0	0	0	0	0	1	1	0	1	1	1	1	1	0	1	0	1	0	1	1	1	1	0	0
Bacillus gibsonii strain FJAT-10019	Bacteria	Firmicutes	Bacillales	0	0	0	0	0	0	0	0	0	0	0	0	0	0	0	0	0	1	1	1	0	1	1	1	1	1	0	1	1	1	1	1	0	1	1	0	0
Bacillus glycinifermentans isolate BGLY genome assembly	Bacteria	Firmicutes	Bacillales	0	0	0	0	0	0	0	0	0	0	0	0	0	0	0	0	0	1	1	1	0	1	1	1	1	1	0	1	1	1	1	1	0	1	1	0	0
Bartonella grahamii as4aup	Bacteria	Proteobacteria	Alphaproteobacteria	0	0	0	0	0	0	0	0	0	0	0	0	0	0	0	0	0	0	1	0	0	1	1	1	0	0	0	0	0	1	0	1	1	1	1	0	0
Bacillus halodurans C-125 DNA	Bacteria	Firmicutes	Bacillales	0	0	1	0	0	0	0	0	0	0	1	0	0	0	0	0	0	1	1	1	0	1	1	1	1	1	0	0	0	1	1	1	0	1	1	0	0
Bacteroides helcogenes P 36-108	Bacteria	Bacteroidetes	Bacteroidia	0	0	1	0	0	0	0	0	0	0	0	0	0	0	0	0	0	0	1	1	0	1	1	1	1	1	0	0	0	0	0	1	1	1	1	0	0
Bartonella henselae strain Houston-1	Bacteria	Proteobacteria	Alphaproteobacteria	0	0	0	0	0	0	0	0	0	0	0	0	0	0	0	0	0	0	1	0	0	1	1	1	0	0	0	0	0	1	0	1	1	1	1	0	0
Bartonella henselae complete genome	Bacteria	Proteobacteria	Alphaproteobacteria	0	0	0	0	0	0	0	0	0	0	0	0	0	0	0	0	0	0	1	0	0	1	1	1	0	0	0	0	0	0	0	1	1	1	1	0	0
Bartonella henselae	Bacteria	Proteobacteria	Alphaproteobacteria	0	0	0	0	0	0	0	0	0	0	0	0	0	0	0	0	0	0	1	0	0	1	1	1	0	0	0	0	0	1	0	1	1	1	1	0	0
Bartonella henselae genome assembly Bartonella henselae MVT02	Bacteria	Proteobacteria	Alphaproteobacteria	0	0	0	0	0	0	0	0	0	0	0	0	0	0	0	0	0	0	1	0	0	1	1	1	0	0	0	0	0	1	0	1	1	1	1	0	0
Bacillus infantis NRRL B-14911	Bacteria	Firmicutes	Bacillales	0	0	0	0	0	0	0	0	0	0	0	0	0	0	0	0	0	1	1	1	0	1	1	1	1	1	0	1	1	1	1	1	0	1	1	0	0
Bacterium L21-Spi-D4	Bacteria	NA	NA	0	0	0	0	0	0	0	0	1	0	0	0	0	0	0	0	0	0	1	1	0	1	1	1	1	1	0	0	0	0	0	1	1	1	1	0	0
Bacillus lehensis G1	Bacteria	Firmicutes	Bacillales	0	0	0	0	0	0	0	0	0	0	0	0	0	0	0	0	0	1	1	1	0	1	1	1	1	1	0	0	0	1	1	1	0	1	1	0	0
Bacillus licheniformis DSM 13 = ATCC 14580	Bacteria	Firmicutes	Bacillales	0	0	0	0	0	0	0	0	0	0	0	0	0	0	0	0	0	1	1	1	0	1	1	1	1	1	0	1	1	1	1	1	0	1	1	0	0
Bacillus licheniformis ATCC 14580	Bacteria	Firmicutes	Bacillales	0	0	0	0	0	0	0	0	0	0	0	0	0	0	0	0	0	1	1	1	0	1	1	1	1	1	0	1	1	1	1	1	0	1	1	0	0
Bacillus licheniformis strain HRBL-15TDI7	Bacteria	Firmicutes	Bacillales	0	0	0	0	0	0	0	0	0	0	0	0	0	0	0	0	0	1	1	1	0	1	1	1	1	1	0	1	0	1	1	1	0	1	1	0	0
Bacillus licheniformis strain BL1202	Bacteria	Firmicutes	Bacillales	0	0	0	0	0	0	0	0	0	0	0	0	0	0	0	0	0	1	1	1	0	1	1	1	1	1	0	1	1	1	1	1	0	1	1	0	0
Bacillus megaterium DSM319	Bacteria	Firmicutes	Bacillales	0	0	0	0	0	0	0	0	0	0	0	0	0	0	0	0	0	1	1	1	0	1	1	1	1	1	0	1	0	1	1	1	0	1	1	0	0
Bacillus megaterium QM B1551	Bacteria	Firmicutes	Bacillales	0	0	0	0	0	0	0	0	0	0	0	0	0	0	0	0	0	1	1	1	0	1	1	1	1	1	0	1	0	1	1	1	0	1	1	0	0
Bacillus megaterium WSH-002	Bacteria	Firmicutes	Bacillales	0	0	0	0	0	0	0	0	0	0	0	0	0	0	0	0	0	1	1	1	0	1	1	1	1	1	0	1	0	1	1	1	0	1	1	0	0
Bacillus megaterium NBRC 15308 = ATCC 14581	Bacteria	Firmicutes	Bacillales	0	0	0	0	0	0	0	0	0	0	0	0	0	0	0	0	0	1	1	1	0	1	1	1	1	1	0	1	0	1	1	1	0	1	1	0	0
Bacillus megaterium strain Q3	Bacteria	Firmicutes	Bacillales	0	0	0	0	0	0	0	0	0	0	0	0	0	0	0	0	0	1	1	1	0	1	1	1	1	1	0	1	0	1	1	1	0	1	1	0	0
Bacillus methanolicus MGA3	Bacteria	Firmicutes	Bacillales	0	0	0	0	0	0	0	0	0	0	0	0	0	0	0	0	0	1	1	1	0	1	1	1	1	1	0	0	1	1	1	1	0	1	1	0	0
Bacillus muralis strain G25-68	Bacteria	Firmicutes	Bacillales	0	0	0	0	0	0	0	0	0	0	0	0	0	0	0	0	0	1	1	1	0	1	1	1	1	1	0	1	1	1	1	1	0	1	1	0	0
Bacillus mycoides strain 219298	Bacteria	Firmicutes	Bacillales	0	0	0	0	0	0	0	0	0	0	0	0	0	0	0	0	0	0	1	1	0	1	1	1	1	1	0	0	1	1	1	1	0	1	1	0	0
Bacillus mycoides strain ATCC 6462	Bacteria	Firmicutes	Bacillales	0	0	0	0	0	0	0	0	0	0	0	0	0	0	0	0	0	0	1	1	0	1	1	1	1	1	0	0	1	1	1	1	0	1	1	0	0
Bacillus oceanisediminis 2691	Bacteria	Firmicutes	Bacillales	0	0	0	0	0	0	0	0	0	0	0	0	0	0	0	0	0	1	1	1	0	1	1	1	1	1	0	0	1	1	1	1	0	1	1	0	0
Bacteroides ovatus strain ATCC 8483	Bacteria	Bacteroidetes	Bacteroidia	0	0	0	0	0	0	0	0	0	0	0	0	0	0	0	0	0	0	1	1	0	1	1	1	1	1	0	1	0	0	0	1	1	1	1	0	0
Bacteroides ovatus V975 genome assembly	Bacteria	Bacteroidetes	Bacteroidia	0	0	0	0	0	0	0	0	0	0	0	0	0	0	0	0	0	0	1	1	0	1	1	1	1	1	0	1	0	0	0	1	1	1	1	0	0
Bacillus licheniformis 9945A	Bacteria	Firmicutes	Bacillales	0	0	0	0	0	0	0	0	0	0	0	0	0	0	0	0	0	1	1	1	0	1	1	1	1	1	0	1	1	1	1	1	0	1	1	0	0
Bacillus licheniformis strain BL-09	Bacteria	Firmicutes	Bacillales	0	0	0	0	0	0	0	0	0	0	0	0	0	0	0	0	0	1	1	1	0	1	1	1	1	1	0	1	1	1	1	1	0	1	1	0	0
Basilea psittacipulmonis DSM 24701	Bacteria	Proteobacteria	Betaproteobacteria	0	0	0	0	0	0	0	0	0	1	0	0	0	0	0	0	0	0	1	0	0	1	1	1	1	1	0	0	0	1	0	1	1	1	0	0	0
Bacillus pseudofirmus OF4	Bacteria	Firmicutes	Bacillales	0	0	0	0	0	0	0	0	0	0	0	0	0	0	0	0	0	1	1	1	0	1	1	1	1	1	0	0	0	1	1	1	0	1	1	0	0
Bacillus pumilus SAFR-032	Bacteria	Firmicutes	Bacillales	0	0	0	0	0	0	0	0	0	0	0	0	0	0	0	0	0	1	1	1	0	1	1	1	1	1	0	1	1	1	1	1	0	1	1	0	0
Bacillus pumilus strain MTCC B6033	Bacteria	Firmicutes	Bacillales	0	0	0	0	0	0	0	0	0	0	0	0	0	0	0	0	0	1	1	1	0	1	1	1	1	1	0	1	0	1	1	1	0	1	1	0	0
Bacillus pumilus strain W3	Bacteria	Firmicutes	Bacillales	0	0	0	0	0	0	0	0	0	0	0	0	0	0	0	0	0	1	1	1	0	1	1	1	1	1	0	1	0	1	1	1	0	1	1	0	0
Bacillus pumilus strain GR-8	Bacteria	Firmicutes	Bacillales	0	0	0	0	0	0	0	0	0	0	0	0	0	0	0	0	0	1	1	1	0	1	1	1	1	1	0	1	0	1	1	1	0	1	1	0	0
Bacillus pumilus strain NJ-M2	Bacteria	Firmicutes	Bacillales	0	0	0	0	0	0	0	0	0	0	0	0	0	0	0	0	0	1	1	1	0	1	1	1	1	1	0	1	0	1	1	1	0	1	1	0	0
Bacillus pumilus strain NJ-V2	Bacteria	Firmicutes	Bacillales	0	0	0	0	0	0	0	0	0	0	0	0	0	0	0	0	0	1	1	1	0	1	1	1	1	1	0	1	0	1	1	1	0	1	1	0	0
Bacillus pumilus DNA	Bacteria	Firmicutes	Bacillales	0	0	0	0	0	0	0	0	0	0	0	0	0	0	0	0	0	1	1	1	0	1	1	1	1	1	0	1	0	1	1	1	0	1	1	0	0
Bacillus pumilus strain SH-B11	Bacteria	Firmicutes	Bacillales	0	0	0	0	0	0	0	0	0	0	0	0	0	0	0	0	0	1	1	1	0	1	1	1	1	1	0	1	1	1	1	1	0	1	1	0	0
Bacillus pumilus strain SH-B9	Bacteria	Firmicutes	Bacillales	0	0	0	0	0	0	0	0	0	0	0	0	0	0	0	0	0	1	1	1	0	1	1	1	1	1	0	1	1	1	1	1	0	1	1	0	0
Bacillus pumilus strain NJ-V	Bacteria	Firmicutes	Bacillales	0	0	0	0	0	0	0	0	0	0	0	0	0	0	0	0	0	1	1	1	0	1	1	1	1	1	0	1	0	1	1	1	0	1	1	0	0
Bacillus pumilus strain PDSLzg-1	Bacteria	Firmicutes	Bacillales	0	0	0	0	0	0	0	0	0	0	1	0	0	0	0	0	0	1	1	1	0	1	1	1	1	1	0	1	0	1	1	1	0	1	1	0	0
Bartonella quintana str. Toulouse	Bacteria	Proteobacteria	Alphaproteobacteria	0	0	0	0	0	0	0	0	0	0	0	0	0	0	0	0	0	0	1	1	0	1	1	1	0	0	0	0	0	1	0	1	1	1	1	0	0
Bartonella quintana RM-11	Bacteria	Proteobacteria	Alphaproteobacteria	0	0	0	0	0	0	0	0	0	0	0	0	0	0	0	0	0	0	1	1	0	1	1	1	0	0	0	0	0	1	0	1	1	1	1	0	0
Bacteroides salanitronis DSM 18170	Bacteria	Bacteroidetes	Bacteroidia	0	0	0	0	0	0	0	0	0	0	0	0	0	0	0	0	0	0	1	1	0	1	1	1	1	1	0	0	0	1	0	1	1	1	1	0	0
Bacillus selenitireducens MLS10	Bacteria	Firmicutes	Bacillales	0	0	0	0	0	0	0	0	0	0	0	0	0	0	0	0	0	0	1	1	0	1	1	1	1	1	0	1	1	1	1	1	0	1	1	0	0
Bacillus simplex strain SH-B26	Bacteria	Firmicutes	Bacillales	0	0	0	0	0	0	0	0	0	0	0	0	0	0	0	0	0	1	1	1	0	1	1	1	1	1	0	0	1	1	1	1	0	1	1	0	0
Bacillus smithii strain DSM 4216	Bacteria	Firmicutes	Bacillales	0	1	0	0	0	0	0	0	0	0	0	0	0	0	0	0	0	1	1	1	0	1	1	1	1	1	0	0	1	1	1	1	0	1	1	0	0
Bacillus sp. JS	Bacteria	Firmicutes	Bacillales	0	0	0	0	0	0	0	0	0	0	0	0	0	0	0	0	0	1	1	1	0	1	1	1	1	1	0	1	1	1	1	1	0	1	1	0	0
Bacillus sp. genome assembly BS34ACh	Bacteria	Firmicutes	Bacillales	0	0	0	0	0	0	0	0	0	0	0	0	0	0	0	0	0	1	1	1	0	1	1	1	1	1	0	1	1	1	1	1	0	1	1	0	0
Bacillus sp. Pc3	Bacteria	Firmicutes	Bacillales	0	0	0	0	0	0	0	0	0	0	0	0	0	0	0	0	0	1	1	1	0	1	1	1	1	1	0	1	1	1	1	1	0	1	1	0	0
Bacillus sp. X1(2014)	Bacteria	Firmicutes	Bacillales	0	0	1	0	0	0	0	0	0	0	0	0	0	0	0	0	0	1	1	1	0	1	1	1	1	1	0	0	1	1	1	1	0	1	1	0	0
Bacillus sp. BH072	Bacteria	Firmicutes	Bacillales	0	0	0	0	0	0	0	0	0	0	0	0	0	0	0	0	0	1	1	1	0	1	1	1	1	1	0	1	1	1	1	1	0	1	1	0	0
Bacillus sp. YP1	Bacteria	Firmicutes	Bacillales	0	0	0	0	0	0	0	0	0	0	0	0	0	0	0	0	0	1	1	1	0	1	1	1	1	1	0	1	1	1	1	1	0	1	1	0	0
Bacillus sp. LM 4-2	Bacteria	Firmicutes	Bacillales	0	0	0	0	0	0	0	0	0	0	0	0	0	0	0	0	0	1	1	1	0	1	1	1	1	1	0	1	1	1	1	1	0	1	1	0	0
Bacillus sp. SDLI1	Bacteria	Firmicutes	Bacillales	0	0	0	0	0	0	0	0	0	0	0	0	0	0	0	0	0	1	1	1	0	1	1	1	1	1	0	1	1	1	1	1	0	1	1	0	0
Bacteroides sp. I48	Bacteria	Bacteroidetes	Bacteroidia	0	0	0	0	0	0	0	0	0	0	0	0	0	0	0	0	0	0	1	1	0	1	1	1	1	1	0	1	0	0	0	1	1	1	1	0	0
Bacillus sp. IHB B 7164	Bacteria	Firmicutes	Bacillales	0	0	0	0	0	0	0	0	0	0	0	0	0	0	0	0	0	1	1	1	0	1	1	1	1	1	0	1	0	1	1	1	0	1	1	0	0
Bacillus sp. FJAT-14266	Bacteria	Firmicutes	Bacillales	0	0	0	0	0	0	0	0	0	0	0	0	0	0	0	0	0	1	1	1	0	1	1	1	1	1	0	1	1	1	1	1	0	1	0	0	0
Bacillus sp. ABP14	Bacteria	Firmicutes	Bacillales	0	0	0	0	0	0	0	0	0	0	0	0	0	0	0	0	0	1	1	1	0	1	1	1	1	1	0	0	1	1	1	1	0	1	1	0	0
Bacillus sp. 1NLA3E	Bacteria	Firmicutes	Bacillales	0	0	0	0	0	0	0	0	0	0	0	0	0	0	0	0	0	1	1	1	0	1	1	1	1	1	0	0	1	1	1	1	0	1	1	0	0
Bacillus sp. WP8	Bacteria	Firmicutes	Bacillales	0	0	0	0	0	0	0	0	0	0	0	0	0	0	0	0	0	1	1	1	0	1	1	1	1	1	0	1	0	1	1	1	0	1	1	0	0
Bacillus sp. OxB-1 DNA	Bacteria	Firmicutes	Bacillales	0	0	0	0	0	0	0	0	0	0	0	0	0	0	0	0	0	1	1	1	0	1	1	1	1	1	0	0	1	1	1	1	0	1	1	0	0
Bacillus subtilis subsp. subtilis str. 168 chromosome	Bacteria	Firmicutes	Bacillales	0	0	0	0	0	0	0	0	0	0	0	0	0	0	0	0	0	1	1	1	0	1	1	1	1	1	0	1	1	1	1	1	0	1	1	0	0
Bacillus subtilis subsp. spizizenii str. W23	Bacteria	Firmicutes	Bacillales	0	0	0	0	0	0	0	0	0	0	0	0	0	0	0	0	0	1	1	1	0	1	1	1	1	1	0	1	1	1	1	1	0	1	1	0	0
Bacillus subtilis BSn5	Bacteria	Firmicutes	Bacillales	0	0	0	0	0	0	0	0	0	0	0	0	0	0	0	0	0	1	1	1	0	1	1	1	1	1	0	1	1	1	1	1	0	1	1	0	0
Bacillus subtilis subsp. natto BEST195 DNA	Bacteria	Firmicutes	Bacillales	0	0	0	0	0	0	0	0	0	0	0	0	0	0	0	0	0	1	1	1	0	1	1	1	1	1	0	1	1	1	1	1	0	1	1	0	0
Bacillus subtilis subsp. spizizenii TU-B-10	Bacteria	Firmicutes	Bacillales	0	0	0	0	0	0	0	0	0	0	0	0	0	0	0	0	0	1	1	1	0	1	1	1	1	1	0	1	1	1	1	1	0	1	1	0	0
Bacillus subtilis subsp. subtilis RO-NN-1	Bacteria	Firmicutes	Bacillales	0	0	0	0	0	0	0	0	0	0	0	0	0	0	0	0	0	1	1	1	0	1	1	1	1	1	0	1	1	1	1	1	0	1	1	0	0
Bacillus subtilis QB928	Bacteria	Firmicutes	Bacillales	0	0	0	0	0	0	0	0	0	0	0	0	0	0	0	0	0	1	1	1	0	1	1	1	1	1	0	1	1	1	1	1	0	1	1	0	0
Bacillus subtilis subsp. subtilis str. BSP1	Bacteria	Firmicutes	Bacillales	0	0	0	0	0	0	0	0	0	0	0	0	0	0	0	0	0	1	1	1	0	1	1	1	1	1	0	1	1	1	1	1	0	1	1	0	0
Bacillus subtilis XF-1	Bacteria	Firmicutes	Bacillales	0	0	0	0	0	0	0	0	0	0	0	0	0	0	0	0	0	1	1	1	0	1	1	1	1	1	0	1	1	1	1	1	0	1	1	0	0
Bacillus subtilis subsp. subtilis 6051-HGW	Bacteria	Firmicutes	Bacillales	0	0	0	0	0	0	0	0	0	0	0	0	0	0	0	0	0	1	1	1	0	1	1	1	1	1	0	1	1	1	1	1	0	1	1	0	0
Bacillus subtilis subsp. subtilis str. BAB-1	Bacteria	Firmicutes	Bacillales	0	0	0	0	0	0	0	0	0	0	0	0	0	0	0	0	0	1	1	1	0	1	1	1	1	1	0	1	1	1	1	1	0	1	1	0	0
Bacillus subtilis PY79	Bacteria	Firmicutes	Bacillales	0	0	0	0	0	0	0	0	0	0	0	0	0	0	0	0	0	1	1	1	0	1	1	1	1	1	0	1	1	1	1	1	0	1	1	0	0
Bacillus subtilis BEST7003 DNA	Bacteria	Firmicutes	Bacillales	0	0	0	0	0	0	0	0	0	0	0	0	0	0	0	0	0	1	1	1	0	1	1	1	1	1	0	1	1	1	1	1	0	1	1	0	0
Bacillus subtilis subsp. subtilis str. JH642 substr. AG174	Bacteria	Firmicutes	Bacillales	0	0	0	0	0	0	0	0	0	0	0	0	0	0	0	0	0	1	1	1	0	1	1	1	1	1	0	1	1	1	1	1	0	1	1	0	0
Bacillus subtilis subsp. subtilis str. AG1839	Bacteria	Firmicutes	Bacillales	0	0	0	0	0	0	0	0	0	0	0	0	0	0	0	0	0	1	1	1	0	1	1	1	1	1	0	1	1	1	1	1	0	1	1	0	0
Bacillus subtilis subsp. subtilis str. OH 131.1	Bacteria	Firmicutes	Bacillales	0	0	0	0	0	0	0	0	0	0	0	0	0	0	0	0	0	1	1	1	0	1	1	1	1	1	0	1	1	1	1	1	0	1	1	0	0
Bacillus subtilis TOA	Bacteria	Firmicutes	Bacillales	0	0	0	0	0	0	0	0	0	0	0	0	0	0	0	0	0	1	1	1	0	1	1	1	1	1	0	1	1	1	1	1	0	1	1	0	0
Bacillus subtilis strain ATCC 13952	Bacteria	Firmicutes	Bacillales	0	0	0	0	0	0	0	0	0	0	0	0	0	0	0	0	0	1	1	1	0	1	1	1	1	1	0	1	1	1	1	1	0	1	1	0	0
Bacillus subtilis strain ATCC 19217	Bacteria	Firmicutes	Bacillales	0	0	0	0	0	0	0	0	0	0	0	0	0	0	0	0	0	1	1	1	0	1	1	1	1	1	0	1	1	1	1	1	0	1	1	0	0
Bacillus subtilis strain Bs-916	Bacteria	Firmicutes	Bacillales	0	0	0	0	0	0	0	0	0	0	0	0	0	0	0	0	0	1	1	1	0	1	1	1	1	1	0	1	1	1	1	1	0	1	1	0	0
Bacillus subtilis strain SG6	Bacteria	Firmicutes	Bacillales	0	0	0	0	0	0	0	0	0	0	0	0	0	0	0	0	0	1	1	1	0	1	1	1	1	1	0	1	1	1	1	1	0	1	1	0	0
Bacillus subtilis subsp. subtilis str. 168	Bacteria	Firmicutes	Bacillales	0	0	0	0	0	0	0	0	0	0	0	0	0	0	0	0	0	1	1	1	0	1	1	1	1	1	0	1	1	1	1	1	0	1	1	0	0
Bacillus subtilis strain PS832	Bacteria	Firmicutes	Bacillales	0	0	0	0	0	0	0	0	0	0	0	0	0	0	0	0	0	1	1	1	0	1	1	1	1	1	0	1	1	1	1	1	0	1	1	0	0
Bacillus subtilis subsp. spizizenii strain NRS 231	Bacteria	Firmicutes	Bacillales	0	0	0	0	0	0	0	0	0	0	0	0	0	0	0	0	0	1	1	1	0	1	1	1	1	1	0	1	1	1	1	1	0	1	1	0	0
Bacillus subtilis subsp. subtilis strain 3NA	Bacteria	Firmicutes	Bacillales	0	0	0	0	0	0	0	0	0	0	0	0	0	0	0	0	0	1	1	1	0	1	1	1	1	1	0	1	1	1	1	1	0	1	1	0	0
Bacillus subtilis genome assembly BS49Ch	Bacteria	Firmicutes	Bacillales	0	0	0	0	0	0	0	0	0	0	0	0	0	0	0	0	0	1	1	1	0	1	1	1	1	1	0	1	1	1	1	1	0	1	1	0	0
Bacillus subtilis strain T30	Bacteria	Firmicutes	Bacillales	0	0	0	0	0	0	0	0	0	0	0	0	0	0	0	0	0	1	1	1	0	1	1	1	1	1	0	1	1	1	1	1	0	1	1	0	0
Bacillus subtilis KCTC 1028	Bacteria	Firmicutes	Bacillales	0	0	0	0	0	0	0	0	0	0	0	0	0	0	0	0	0	1	1	1	0	1	1	1	1	1	0	1	1	1	1	1	0	1	1	0	0
Bacillus subtilis HJ5	Bacteria	Firmicutes	Bacillales	0	0	0	0	0	0	0	0	0	0	0	0	0	0	0	0	0	1	1	1	0	1	1	1	1	1	0	1	1	1	1	1	0	1	1	0	0
Bacillus subtilis strain UD1022	Bacteria	Firmicutes	Bacillales	0	0	0	0	0	0	0	0	0	0	0	0	0	0	0	0	0	1	1	1	0	1	1	1	1	1	0	1	1	1	1	1	0	1	1	0	0
Bacillus subtilis strain TO-A JPC	Bacteria	Firmicutes	Bacillales	0	0	0	0	0	0	0	0	0	0	0	0	0	0	0	0	0	1	1	1	0	1	1	1	1	1	0	1	1	1	1	1	0	1	1	0	0
Bacillus subtilis subsp. subtilis strain BSD-2	Bacteria	Firmicutes	Bacillales	0	0	0	0	0	0	0	0	0	0	0	0	0	0	0	0	0	1	1	1	0	1	1	1	1	1	0	1	1	1	1	1	0	1	1	0	0
Bacillus subtilis subsp. inaquosorum strain DE111	Bacteria	Firmicutes	Bacillales	0	0	0	0	0	0	0	0	0	0	0	0	0	0	0	0	0	1	1	1	0	1	1	1	1	1	0	1	1	1	1	1	0	1	1	0	0
Bacillus subtilis subsp. subtilis strain CU1050	Bacteria	Firmicutes	Bacillales	0	0	0	0	0	0	0	0	0	0	0	0	0	0	0	0	0	1	1	1	0	1	1	1	1	1	0	1	1	1	1	1	0	1	1	0	0
Bacillus subtilis subsp. natto strain CGMCC 2108.	Bacteria	Firmicutes	Bacillales	0	0	0	0	0	0	0	0	0	0	0	0	0	0	0	0	0	1	1	1	0	1	1	1	1	1	0	1	1	1	1	1	0	1	1	0	0
Bacillus subtilis subsp. subtilis strain D12-5	Bacteria	Firmicutes	Bacillales	0	0	0	0	0	0	0	0	0	0	0	0	0	0	0	0	0	1	1	1	0	1	1	1	1	1	0	1	1	1	1	1	0	1	1	0	0
Bacillus subtilis subsp. globigii strain ATCC 49760	Bacteria	Firmicutes	Bacillales	0	0	0	0	0	0	0	0	0	0	0	0	0	0	0	0	0	1	1	1	0	1	1	1	1	1	0	1	1	1	1	1	0	1	1	0	0
Bacillus subtilis strain SZMC 6179J	Bacteria	Firmicutes	Bacillales	0	0	0	0	0	0	0	0	0	0	0	0	0	0	0	0	0	1	1	1	0	1	1	1	1	1	0	1	1	1	1	1	0	1	1	0	0
Bacillus subtilis subsp. subtilis strain delta6	Bacteria	Firmicutes	Bacillales	0	0	0	0	0	0	0	0	0	0	0	0	0	0	0	0	0	1	1	1	0	1	1	1	1	1	0	1	1	1	1	1	0	1	1	0	0
Bacillus subtilis subsp. subtilis strain KCTC 3135	Bacteria	Firmicutes	Bacillales	0	0	0	0	0	0	0	0	0	0	0	0	0	0	0	0	0	1	1	1	0	1	1	1	1	1	0	1	1	1	1	1	0	1	1	0	0
Bacillus subtilis subsp. subtilis strain 168G	Bacteria	Firmicutes	Bacillales	0	0	0	0	0	0	0	0	0	0	0	0	0	0	0	0	0	1	1	1	0	1	1	1	1	1	0	1	1	1	1	1	0	1	1	0	0
Bacillus subtilis strain HJ0-6	Bacteria	Firmicutes	Bacillales	0	0	0	0	0	0	0	0	0	0	0	0	0	0	0	0	0	1	1	1	0	1	1	1	1	1	0	1	1	1	1	1	0	1	1	0	0
Bacillus subtilis strain BS16045	Bacteria	Firmicutes	Bacillales	0	0	0	0	0	0	0	0	0	0	0	0	0	0	0	0	0	1	1	1	0	1	1	1	1	1	0	1	1	1	1	1	0	1	1	0	0
Bacillus subtilis strain BS38	Bacteria	Firmicutes	Bacillales	0	0	0	0	0	0	0	0	0	0	0	0	0	0	0	0	0	1	1	1	0	1	1	1	1	1	0	1	1	1	1	1	0	1	1	0	0
Bacillus subtilis strain HRBS-10TDI13	Bacteria	Firmicutes	Bacillales	0	0	0	0	0	0	0	0	0	0	0	0	0	0	0	0	0	1	1	1	0	1	1	1	1	1	0	1	1	1	1	1	0	1	1	0	0
Bacillus subtilis strain VV2	Bacteria	Firmicutes	Bacillales	0	0	0	0	0	0	0	0	0	0	0	0	0	0	0	0	0	1	1	1	0	1	1	1	1	1	0	1	1	1	1	1	0	1	1	0	0
Bacillus thuringiensis serovar konkukian str. 97-27 chromosome	Bacteria	Firmicutes	Bacillales	0	0	0	0	0	0	0	0	0	0	0	0	0	0	0	0	0	1	1	1	0	1	1	1	1	1	0	0	1	1	1	1	0	1	1	0	0
Bacillus thuringiensis str. Al Hakam	Bacteria	Firmicutes	Bacillales	0	0	0	0	0	0	0	0	0	0	0	0	0	0	0	0	0	1	1	1	0	1	1	1	1	1	0	0	1	1	1	1	0	1	1	0	0
Bacillus thuringiensis BMB171	Bacteria	Firmicutes	Bacillales	0	0	0	0	0	0	0	0	0	0	0	0	0	0	0	0	0	1	1	1	0	1	1	1	1	1	0	0	1	1	1	1	0	1	1	0	0
Bacillus thuringiensis serovar chinensis CT-43	Bacteria	Firmicutes	Bacillales	0	0	1	0	0	0	0	0	0	0	0	0	0	0	0	0	0	1	1	1	0	1	1	1	1	1	0	0	1	1	1	1	0	1	1	0	0
Bacillus thuringiensis HD-771	Bacteria	Firmicutes	Bacillales	0	0	0	0	0	0	0	0	0	0	0	0	0	0	0	0	0	1	1	1	0	1	1	1	1	1	0	0	1	1	1	1	0	1	1	0	0
Bacillus thuringiensis HD-789	Bacteria	Firmicutes	Bacillales	0	0	0	0	0	0	0	0	0	0	0	0	0	0	0	0	0	1	1	1	0	1	1	1	1	1	0	0	1	1	1	1	0	1	1	0	0
Bacillus thuringiensis MC28	Bacteria	Firmicutes	Bacillales	0	0	1	0	0	0	0	0	0	0	0	0	0	0	0	0	0	0	0	1	0	1	1	1	1	1	0	0	1	1	1	1	0	1	1	0	0
Bacillus thuringiensis Bt407	Bacteria	Firmicutes	Bacillales	0	0	0	0	0	0	0	0	0	0	0	0	0	0	0	0	0	1	1	1	0	1	1	1	1	1	0	0	1	1	1	1	0	1	1	0	0
Bacillus thuringiensis serovar kurstaki str. HD73	Bacteria	Firmicutes	Bacillales	0	0	0	0	0	0	0	0	0	0	0	0	0	0	0	0	0	1	1	1	0	1	1	1	1	1	0	0	1	1	1	1	0	1	1	0	0
Bacillus thuringiensis serovar thuringiensis str. IS5056	Bacteria	Firmicutes	Bacillales	0	0	1	0	0	0	0	0	0	0	0	0	0	0	0	0	0	1	1	1	0	1	1	1	1	1	0	0	1	1	1	1	0	1	1	0	0
Bacillus thuringiensis YBT-1518	Bacteria	Firmicutes	Bacillales	0	0	0	0	0	0	0	0	0	0	0	0	0	0	0	0	0	1	1	1	0	1	1	1	1	1	0	0	1	1	1	1	0	1	1	0	0
Bacillus thuringiensis serovar kurstaki str. YBT-1520	Bacteria	Firmicutes	Bacillales	0	0	1	0	0	0	0	0	0	0	0	0	0	0	0	0	0	1	1	1	0	1	1	1	1	1	0	0	1	1	1	1	0	1	1	0	0
Bacillus thuringiensis serovar kurstaki str. HD-1	Bacteria	Firmicutes	Bacillales	0	0	1	0	0	0	0	0	0	0	0	0	0	0	0	0	0	1	1	1	0	1	1	1	1	1	0	0	1	1	1	0	0	1	1	0	0
Bacillus thuringiensis serovar kurstaki str. YBT-1520	Bacteria	Firmicutes	Bacillales	0	0	1	0	0	0	0	0	0	0	0	0	0	0	0	0	0	1	1	1	0	1	1	1	1	1	0	0	1	1	1	1	0	1	1	0	0
Bacillus thuringiensis serovar galleriae strain HD-29	Bacteria	Firmicutes	Bacillales	0	0	1	0	0	0	0	0	0	0	0	0	0	0	0	0	0	1	1	1	0	1	1	1	1	1	0	0	1	1	1	1	0	1	1	0	0
Bacillus thuringiensis strain HD1011	Bacteria	Firmicutes	Bacillales	0	0	0	0	0	0	0	0	0	0	0	0	0	0	0	0	0	1	0	1	0	1	1	1	1	1	0	0	1	1	1	1	0	1	1	0	0
Bacillus thuringiensis strain HD571	Bacteria	Firmicutes	Bacillales	0	0	0	0	0	0	0	0	0	0	0	0	0	0	0	0	0	1	1	1	0	1	1	1	1	1	0	0	1	1	1	1	0	1	1	0	0
Bacillus thuringiensis strain Al Hakam	Bacteria	Firmicutes	Bacillales	0	0	0	0	0	0	0	0	0	0	0	0	0	0	0	0	0	0	1	1	0	1	1	1	1	1	0	0	1	1	1	1	0	1	1	0	0
Bacillus thuringiensis strain HD682	Bacteria	Firmicutes	Bacillales	0	0	0	0	0	0	0	0	0	0	0	0	0	0	0	0	0	1	0	1	0	1	1	1	1	1	0	0	1	1	1	1	0	1	1	0	0
Bacillus thuringiensis strain 97-27	Bacteria	Firmicutes	Bacillales	0	0	0	0	0	0	0	0	0	0	0	0	0	0	0	0	0	1	0	1	0	1	1	1	1	1	0	0	1	1	1	1	0	1	1	0	0
Bacillus thuringiensis HD1002	Bacteria	Firmicutes	Bacillales	0	0	0	0	0	0	0	0	0	0	0	0	0	0	0	0	0	1	1	1	0	1	1	1	1	1	0	0	1	1	1	1	0	1	1	0	0
Bacillus thuringiensis serovar morrisoni strain BGSC 4AA1	Bacteria	Firmicutes	Bacillales	0	0	0	0	0	0	0	0	0	0	0	0	0	0	0	0	0	1	1	1	0	1	1	1	1	1	0	0	1	1	1	1	0	1	1	0	0
Bacillus thuringiensis strain YC-10	Bacteria	Firmicutes	Bacillales	0	0	1	0	0	0	0	0	0	0	0	0	0	0	0	0	0	1	1	1	0	1	1	1	1	1	0	0	1	1	1	1	0	1	0	0	0
Bacillus thuringiensis strain HS18-1	Bacteria	Firmicutes	Bacillales	0	0	0	0	0	0	0	0	0	0	0	0	0	0	0	0	0	0	1	1	0	1	1	1	1	1	0	0	1	1	1	1	0	1	1	0	0
Bacillus thuringiensis serovar indiana strain HD521	Bacteria	Firmicutes	Bacillales	0	0	1	0	0	0	0	0	0	0	0	0	0	0	0	0	0	1	0	1	0	1	1	1	1	1	0	0	1	1	1	1	0	1	1	0	0
Bacillus thuringiensis strain YWC2-8	Bacteria	Firmicutes	Bacillales	0	0	1	0	0	0	0	0	0	0	0	0	0	0	0	0	0	1	1	1	0	1	1	1	1	1	0	0	1	1	1	1	0	1	1	0	0
Bacillus thuringiensis serovar tolworthi DNA	Bacteria	Firmicutes	Bacillales	0	0	1	0	0	0	0	0	0	0	0	0	0	0	0	0	0	1	1	1	0	1	1	1	1	1	0	0	1	1	1	1	0	1	1	0	0
Bacillus thuringiensis strain Bt185	Bacteria	Firmicutes	Bacillales	0	1	1	0	0	0	0	0	0	0	0	0	0	0	0	0	0	1	1	1	0	1	1	1	1	1	0	0	1	1	1	1	0	1	1	0	0
Bacillus thuringiensis strain HD12	Bacteria	Firmicutes	Bacillales	0	0	0	0	0	0	0	0	0	0	0	0	0	0	0	0	0	1	1	1	0	1	1	1	1	1	0	0	1	1	1	1	0	1	1	0	0
Bacillus thuringiensis strain Bc601	Bacteria	Firmicutes	Bacillales	0	0	1	0	0	0	0	0	0	0	0	0	0	0	0	0	0	1	1	1	0	1	1	1	1	1	0	0	1	1	1	1	0	1	0	0	0
Bacillus thuringiensis serovar alesti strain BGSC 4C1	Bacteria	Firmicutes	Bacillales	0	0	0	0	0	0	0	0	0	0	0	0	0	0	0	0	0	1	1	1	0	1	1	1	1	1	0	0	1	1	1	1	0	1	1	0	0
Bacillus thuringiensis strain MYBT18246	Bacteria	Firmicutes	Bacillales	0	0	0	0	0	0	0	0	0	0	0	0	0	0	0	0	0	1	1	1	0	1	1	1	1	1	0	0	1	1	1	1	0	1	1	0	0
Bacillus thuringiensis strain KNU-07	Bacteria	Firmicutes	Bacillales	0	0	0	0	0	0	0	0	0	0	0	0	0	0	0	0	0	1	0	1	0	1	1	1	1	1	0	0	1	1	1	1	0	1	1	0	0
Bacteroides thetaiotaomicron VPI-5482 chromosome	Bacteria	Bacteroidetes	Bacteroidia	0	0	0	0	0	0	0	0	0	0	0	0	0	0	0	0	0	0	1	1	0	1	1	1	1	1	0	1	0	0	0	1	1	1	1	0	0
Bacillus toyonensis BCT-7112	Bacteria	Firmicutes	Bacillales	0	0	0	0	0	0	0	0	0	0	0	0	0	0	0	0	0	1	0	1	0	1	0	1	1	0	0	0	1	1	0	1	0	1	1	0	0
Bartonella tribocorum main chromosome complete genome	Bacteria	Proteobacteria	Alphaproteobacteria	0	0	0	0	0	0	0	0	0	0	0	0	0	0	0	0	0	0	1	0	0	1	1	1	0	0	0	0	0	1	0	1	1	1	1	0	0
Bacillus amyloliquefaciens subsp. plantarum str. FZB42	Bacteria	Firmicutes	Bacillales	0	0	0	0	0	0	0	0	0	0	0	0	0	0	0	0	0	1	1	1	0	1	0	1	1	1	0	1	1	1	1	1	0	1	1	0	0
Bacillus amyloliquefaciens subsp. plantarum CAU B946 complete genome.	Bacteria	Firmicutes	Bacillales	0	0	0	0	0	0	0	0	0	0	0	0	0	0	0	0	0	1	1	1	0	1	1	1	1	1	0	1	1	1	1	1	0	1	1	0	0
Bacillus amyloliquefaciens subsp. plantarum YAU B9601-Y2 complete genome.	Bacteria	Firmicutes	Bacillales	0	0	0	0	0	0	0	0	0	0	0	0	0	0	0	0	0	1	1	1	0	1	1	1	1	1	0	1	1	1	1	1	0	1	1	0	0
Bacillus methylotrophicus AS43.3	Bacteria	Firmicutes	Bacillales	0	0	0	0	0	0	0	0	0	0	0	0	0	0	0	0	0	1	1	1	0	1	1	1	1	1	0	1	0	1	1	1	0	0	0	0	0
Bacillus amyloliquefaciens subsp. plantarum UCMB5036 complete genome.	Bacteria	Firmicutes	Bacillales	0	0	0	0	0	0	0	0	0	0	0	0	0	0	0	0	0	1	1	1	0	1	1	1	1	1	0	1	1	1	1	1	0	1	1	0	0
Bacillus amyloliquefaciens subsp. plantarum UCMB5033	Bacteria	Firmicutes	Bacillales	0	0	0	0	0	0	0	0	0	0	0	0	0	0	0	0	0	1	1	1	0	1	1	1	1	1	0	1	1	1	1	1	0	1	1	0	0
Bacillus amyloliquefaciens subsp. plantarum UCMB5113	Bacteria	Firmicutes	Bacillales	0	0	0	0	0	0	0	0	0	0	0	0	0	0	0	0	0	1	1	1	0	1	1	1	1	1	0	1	1	1	1	1	0	1	1	0	0
Bacillus amyloliquefaciens subsp. plantarum NAU-B3	Bacteria	Firmicutes	Bacillales	0	0	0	0	0	0	0	0	0	0	0	0	0	0	0	0	0	1	1	1	0	1	1	1	1	1	0	1	1	1	1	1	0	1	1	0	0
Bacillus amyloliquefaciens subsp. plantarum TrigoCor1448	Bacteria	Firmicutes	Bacillales	0	0	0	0	0	0	0	0	0	0	0	0	0	0	0	0	0	1	1	1	0	1	1	1	1	1	0	1	1	1	1	1	0	1	1	0	0
Bacillus velezensis SQR9	Bacteria	Firmicutes	Bacillales	0	0	0	0	0	0	0	0	0	0	0	0	0	0	0	0	0	1	1	1	0	1	1	1	1	1	0	1	1	1	1	1	0	1	1	0	0
Bacillus methylotrophicus strain JS25R	Bacteria	Firmicutes	Bacillales	0	0	0	0	0	0	0	0	0	0	0	0	0	0	0	0	0	1	1	1	0	1	1	1	1	1	0	1	1	1	1	1	0	1	1	0	0
Bacillus velezensis NJN-6	Bacteria	Firmicutes	Bacillales	0	0	0	0	0	0	0	0	0	0	0	0	0	0	0	0	0	1	1	1	0	1	1	1	1	1	0	1	1	1	1	1	0	1	1	0	0
Bacillus methylotrophicus strain JJ-D34	Bacteria	Firmicutes	Bacillales	0	0	0	0	0	0	0	0	0	0	0	0	0	0	0	0	0	1	1	1	0	1	1	1	1	1	0	1	1	1	1	1	0	1	1	0	0
Bacillus methylotrophicus strain YJ11-1-4	Bacteria	Firmicutes	Bacillales	0	0	0	0	0	0	0	0	0	0	0	0	0	0	0	0	0	1	1	1	0	1	1	1	1	1	0	1	1	1	1	1	0	1	1	0	0
Bacillus amyloliquefaciens strain G341	Bacteria	Firmicutes	Bacillales	0	0	0	0	0	0	0	0	0	0	0	0	0	0	0	0	0	1	1	1	0	1	1	1	1	1	0	1	1	1	1	1	0	1	1	0	0
Bacillus methylotrophicus strain B25 genome assembly	Bacteria	Firmicutes	Bacillales	0	0	0	0	0	0	0	0	0	0	0	0	0	0	0	0	0	1	1	1	0	1	1	1	1	1	0	1	1	1	1	1	0	1	1	0	0
Bacillus velezensis strain CC09	Bacteria	Firmicutes	Bacillales	0	0	0	0	0	0	0	0	0	0	0	0	0	0	0	0	0	1	1	1	0	1	1	1	1	1	0	1	1	1	1	1	0	1	1	0	0
Bacillus velezensis strain S3-1	Bacteria	Firmicutes	Bacillales	0	0	0	0	0	0	0	0	0	0	0	0	0	0	0	0	0	1	1	1	0	1	1	1	1	1	0	1	1	1	1	1	0	1	1	0	0
Bacillus velezensis strain LS69	Bacteria	Firmicutes	Bacillales	0	0	0	0	0	0	0	0	0	0	0	0	0	0	0	0	0	1	1	1	0	1	1	1	1	1	0	1	1	1	1	1	0	1	1	0	0
Bacillus velezensis strain M75	Bacteria	Firmicutes	Bacillales	0	0	0	0	0	0	0	0	0	0	0	0	0	0	0	0	0	1	1	1	0	1	1	1	1	1	0	1	1	1	1	1	0	1	1	0	0
Bacillus velezensis strain D2-2	Bacteria	Firmicutes	Bacillales	0	0	0	0	0	0	0	0	0	0	0	0	0	0	0	0	0	1	1	1	0	1	1	1	1	1	0	1	0	1	1	1	0	1	1	0	0
Bacillus velezensis strain 9912D	Bacteria	Firmicutes	Bacillales	0	0	0	0	0	0	0	0	0	0	0	0	0	0	0	0	0	1	1	1	0	1	1	1	1	1	0	1	1	1	1	1	0	1	1	0	0
Bartonella vinsonii subsp. berkhoffii str. Winnie	Bacteria	Proteobacteria	Alphaproteobacteria	0	0	0	0	0	0	0	0	0	0	0	0	0	0	0	0	0	0	1	0	0	1	1	1	0	0	0	0	0	1	0	1	1	1	1	0	0
Barnesiella viscericola DSM 18177	Bacteria	Bacteroidetes	Bacteroidia	0	0	0	0	0	0	0	0	1	0	1	0	0	0	0	0	0	0	1	1	0	1	1	1	1	1	0	0	0	0	0	1	1	1	1	0	0
Bacteroides vulgatus ATCC 8482	Bacteria	Bacteroidetes	Bacteroidia	0	0	0	0	0	0	0	0	0	0	0	0	0	0	0	0	0	0	1	1	0	1	1	1	1	1	0	1	0	1	0	1	1	1	1	0	0
Bacillus weihenstephanensis KBAB4	Bacteria	Firmicutes	Bacillales	0	0	0	0	0	0	0	0	0	0	0	0	0	0	0	0	0	0	1	1	0	1	1	1	1	1	0	0	1	1	1	1	0	1	1	0	0
Bacillus weihenstephanensis strain WSBC 10204	Bacteria	Firmicutes	Bacillales	0	0	0	0	0	0	0	0	0	0	0	0	0	0	0	0	0	0	1	1	0	1	1	1	1	1	0	0	1	1	1	1	0	1	1	0	0
Bacillus xiamenensis strain VV3	Bacteria	Firmicutes	Bacillales	0	0	1	0	0	0	0	0	0	0	0	0	0	0	0	0	0	1	1	1	0	1	1	1	1	1	0	1	0	1	1	1	0	1	1	0	0
Bdellovibrio bacteriovorus complete genome	Bacteria	Proteobacteria	Deltaproteobacteria	0	0	0	0	0	0	0	0	0	0	0	0	0	0	0	0	0	1	1	1	0	1	1	1	1	1	0	0	0	1	0	1	1	1	1	0	0
Bdellovibrio bacteriovorus str. Tiberius	Bacteria	Proteobacteria	Deltaproteobacteria	0	0	0	0	0	0	0	0	0	0	0	0	0	0	0	0	0	1	1	1	0	1	1	1	1	1	0	0	0	1	0	1	1	1	1	0	0
Bdellovibrio bacteriovorus W	Bacteria	Proteobacteria	Deltaproteobacteria	0	0	0	0	0	0	0	0	0	0	0	0	0	0	0	0	0	1	1	1	0	1	1	1	1	1	0	0	0	0	0	1	1	1	0	0	0
Bdellovibrio bacteriovorus strain 109J	Bacteria	Proteobacteria	Deltaproteobacteria	0	0	0	0	0	0	0	0	0	0	0	0	0	0	0	0	0	1	1	1	0	1	1	1	1	1	0	0	0	1	0	1	1	1	1	0	0
Bdellovibrio exovorus JSS	Bacteria	Proteobacteria	Deltaproteobacteria	0	0	0	0	0	0	0	0	1	0	0	0	0	0	0	0	0	0	1	1	0	1	1	1	1	1	0	0	0	1	0	1	1	1	1	0	0
Belliella baltica DSM 15883	Bacteria	Bacteroidetes	Cytophagia	0	0	0	0	0	0	0	0	1	0	0	0	0	0	0	0	0	0	1	1	0	1	1	1	1	1	0	0	0	0	0	1	1	1	1	0	0
Beutenbergia cavernae DSM 12333	Bacteria	Actinobacteria	Micrococcales	0	0	0	0	0	0	0	0	0	0	0	0	0	0	0	0	0	1	1	1	0	1	0	1	1	1	0	0	0	1	0	1	1	1	1	1	0
Beijerinckia indica subsp. indica ATCC 9039	Bacteria	Proteobacteria	Alphaproteobacteria	0	0	0	0	0	0	0	0	0	0	0	0	0	0	0	0	0	1	1	0	0	1	1	1	1	1	0	0	0	1	0	1	1	1	1	0	0
Beggiatoa leptomitiformis strain D-402	Bacteria	Proteobacteria	Gammaproteobacteria	0	0	0	0	0	0	0	0	0	0	0	0	0	0	0	0	0	0	1	0	0	1	1	0	1	1	0	0	0	1	0	1	1	1	0	0	1
Beta proteobacterium CB	Bacteria	Proteobacteria	Betaproteobacteria	0	0	0	0	0	0	0	0	0	0	0	0	0	0	0	0	0	0	1	0	0	1	1	1	1	1	0	0	0	1	0	1	1	1	0	0	0
Bifidobacterium actinocoloniiforme DSM 22766	Bacteria	Actinobacteria	Bifidobacteriales	0	0	0	0	1	0	0	0	0	0	0	0	0	0	0	0	0	0	1	1	0	1	0	1	1	1	0	0	0	1	0	1	1	1	0	0	0
Bifidobacterium adolescentis ATCC 15703 DNA	Bacteria	Actinobacteria	Bifidobacteriales	0	0	1	0	0	0	0	0	0	0	0	0	0	0	0	0	0	0	1	1	0	1	0	1	1	1	0	0	0	1	0	1	1	1	1	0	0
Bifidobacterium adolescentis strain 22L	Bacteria	Actinobacteria	Bifidobacteriales	0	0	0	0	1	0	0	0	0	0	0	0	0	0	0	0	0	0	1	1	0	1	0	1	1	1	0	0	0	1	0	1	1	1	1	0	0
Bifidobacterium adolescentis strain BBMN23	Bacteria	Actinobacteria	Bifidobacteriales	0	0	0	0	0	0	0	0	0	0	0	0	0	0	0	0	0	0	1	1	0	1	0	1	1	1	0	0	0	1	0	1	1	1	1	0	0
Bifidobacterium angulatum strain GT102	Bacteria	Actinobacteria	Bifidobacteriales	0	0	0	0	0	0	1	0	0	0	0	0	0	0	0	0	0	0	1	1	0	1	0	1	1	1	0	0	0	1	0	1	1	1	0	0	0
Bifidobacterium angulatum DSM 20098 = JCM 7096 DNA	Bacteria	Actinobacteria	Bifidobacteriales	0	0	0	0	1	0	0	0	0	0	0	0	0	0	0	0	0	0	1	1	0	0	0	1	1	1	0	0	0	1	0	1	1	1	0	0	0
Bifidobacterium animalis subsp. lactis AD011	Bacteria	Actinobacteria	Bifidobacteriales	0	0	0	0	0	0	0	0	0	0	0	0	0	0	0	0	0	0	1	1	0	1	0	1	1	1	0	0	0	1	0	1	1	1	0	0	0
Bifidobacterium animalis subsp. lactis Bl-04	Bacteria	Actinobacteria	Bifidobacteriales	0	0	0	0	0	0	0	0	0	0	0	0	0	1	0	0	0	0	1	1	0	1	0	1	1	1	0	0	0	1	0	1	1	1	0	0	0
Bifidobacterium animalis subsp. lactis DSM 10140	Bacteria	Actinobacteria	Bifidobacteriales	0	0	0	0	0	0	0	0	0	0	0	0	0	1	0	0	0	0	1	1	0	1	0	1	1	1	0	0	0	1	0	1	1	1	0	0	0
Bifidobacterium animalis subsp. lactis BB-12	Bacteria	Actinobacteria	Bifidobacteriales	0	0	0	0	0	0	0	0	0	0	0	0	0	1	0	0	0	0	1	1	0	1	0	1	1	1	0	0	0	1	0	1	1	1	0	0	0
Bifidobacterium animalis subsp. lactis V9	Bacteria	Actinobacteria	Bifidobacteriales	0	0	0	0	0	0	0	0	0	0	0	0	0	1	0	0	0	0	1	1	0	1	0	1	1	1	0	0	0	1	0	1	1	1	0	0	0
Bifidobacterium animalis subsp. lactis CNCM I-2494	Bacteria	Actinobacteria	Bifidobacteriales	0	0	0	0	0	0	0	0	0	0	0	0	0	1	0	0	0	0	1	1	0	1	0	1	1	1	0	0	0	1	0	1	1	1	0	0	0
Bifidobacterium animalis subsp. lactis BLC1	Bacteria	Actinobacteria	Bifidobacteriales	0	0	0	0	0	0	0	0	0	0	0	0	0	1	0	0	0	0	1	1	0	1	0	1	1	1	0	0	0	1	0	1	1	1	0	0	0
Bifidobacterium animalis subsp. animalis ATCC 25527	Bacteria	Actinobacteria	Bifidobacteriales	0	0	0	0	1	0	0	0	0	0	0	0	0	0	0	0	0	0	1	1	0	1	0	1	1	1	0	0	0	1	0	1	1	1	0	0	0
Bifidobacterium animalis subsp. lactis B420	Bacteria	Actinobacteria	Bifidobacteriales	0	0	0	0	0	0	0	0	0	0	0	0	0	1	0	0	0	0	1	1	0	1	0	1	1	1	0	0	0	1	0	1	1	1	0	0	0
Bifidobacterium animalis subsp. lactis Bi-07	Bacteria	Actinobacteria	Bifidobacteriales	0	0	0	0	0	0	0	0	0	0	0	0	0	1	0	0	0	0	1	1	0	1	0	1	1	1	0	0	0	1	0	1	1	1	0	0	0
Bifidobacterium animalis subsp. lactis Bl12	Bacteria	Actinobacteria	Bifidobacteriales	0	0	0	0	0	0	0	0	0	0	0	0	0	1	0	0	0	0	1	1	0	1	0	1	1	1	0	0	0	1	0	1	1	1	0	0	0
Bifidobacterium animalis subsp. lactis ATCC 27673	Bacteria	Actinobacteria	Bifidobacteriales	0	0	0	0	1	0	0	0	0	0	0	0	0	0	0	0	0	0	1	1	0	1	0	1	0	1	0	0	0	1	0	1	1	0	0	0	0
Bifidobacterium animalis strain RH	Bacteria	Actinobacteria	Bifidobacteriales	0	0	0	0	0	0	0	0	0	0	0	0	0	1	0	0	0	0	1	1	0	1	0	1	1	1	0	0	0	1	0	1	1	1	0	0	0
Bifidobacterium animalis strain A6	Bacteria	Actinobacteria	Bifidobacteriales	0	0	0	0	0	0	0	0	0	0	0	0	0	1	0	0	0	0	1	1	0	1	0	1	1	1	0	0	0	1	0	1	1	1	0	0	0
Bifidobacterium animalis subsp. lactis strain BF052	Bacteria	Actinobacteria	Bifidobacteriales	0	0	0	0	0	0	0	0	0	0	0	0	0	1	0	0	0	0	1	1	0	1	0	1	1	1	0	0	0	1	0	1	1	1	0	0	0
Bifidobacterium animalis subsp. animalis strain YL2	Bacteria	Actinobacteria	Bifidobacteriales	0	0	0	0	1	0	0	0	0	0	0	0	0	0	0	0	0	0	1	1	0	1	0	1	1	1	0	0	0	0	0	1	1	1	0	0	0
Bifidobacterium asteroides PRL2011	Bacteria	Actinobacteria	Bifidobacteriales	0	0	0	0	1	0	0	0	0	0	0	0	0	0	0	0	0	0	1	1	0	1	0	1	1	1	0	0	0	1	0	1	1	1	0	0	0
Bifidobacterium bifidum PRL2010 chromosome	Bacteria	Actinobacteria	Bifidobacteriales	0	0	0	0	0	0	0	0	0	0	0	0	0	0	0	0	0	0	1	0	0	1	0	1	1	1	0	0	0	1	0	1	1	1	0	0	0
Bifidobacterium bifidum BGN4	Bacteria	Actinobacteria	Bifidobacteriales	0	0	0	0	0	0	0	0	0	0	0	0	0	0	0	0	0	0	1	0	0	1	0	1	1	1	0	0	0	1	0	1	1	1	0	0	0
Bifidobacterium bifidum ATCC 29521 = JCM 1255 = DSM 20456 DNA	Bacteria	Actinobacteria	Bifidobacteriales	0	0	0	0	0	0	0	0	0	0	0	0	0	0	0	0	0	0	1	0	0	1	0	1	1	1	0	0	0	1	0	1	1	1	0	0	0
Bifidobacterium bifidum strain BF3	Bacteria	Actinobacteria	Bifidobacteriales	0	0	0	0	0	0	0	0	0	0	0	0	0	0	0	0	0	0	1	0	0	1	0	1	1	1	0	0	0	1	0	1	1	1	0	0	0
Bifidobacterium breve ACS-071-V-Sch8b	Bacteria	Actinobacteria	Bifidobacteriales	0	0	1	0	0	0	0	0	0	0	0	0	0	0	0	0	0	0	1	1	0	1	0	1	1	1	0	0	0	1	0	1	1	1	0	0	0
Bifidobacterium breve UCC2003	Bacteria	Actinobacteria	Bifidobacteriales	0	0	1	0	0	0	0	0	0	0	0	0	0	0	0	0	0	0	1	1	0	1	0	1	1	1	0	0	0	1	0	1	1	1	0	0	0
Bifidobacterium breve 12L	Bacteria	Actinobacteria	Bifidobacteriales	0	0	0	0	0	0	0	0	0	0	0	0	0	0	0	0	0	0	1	1	0	1	0	1	1	1	0	0	0	1	0	1	1	1	0	0	0
Bifidobacterium breve JCM 7017	Bacteria	Actinobacteria	Bifidobacteriales	0	0	1	0	0	0	0	0	0	0	0	0	0	0	0	0	0	0	1	1	0	1	0	1	1	1	0	0	0	1	0	1	1	1	0	0	0
Bifidobacterium breve NCFB 2258	Bacteria	Actinobacteria	Bifidobacteriales	0	0	1	0	0	0	0	0	0	0	0	0	0	0	0	0	0	0	1	1	0	1	0	1	1	1	0	0	0	1	0	1	1	1	0	0	0
Bifidobacterium breve 689b	Bacteria	Actinobacteria	Bifidobacteriales	0	0	0	0	0	0	0	0	0	0	0	0	0	0	0	0	0	0	1	1	0	1	0	1	1	1	0	0	0	1	0	1	1	1	0	0	0
Bifidobacterium breve S27	Bacteria	Actinobacteria	Bifidobacteriales	0	0	1	0	0	0	0	0	0	0	0	0	0	0	0	0	0	0	1	1	0	1	0	1	1	1	0	0	0	1	0	0	1	1	0	0	0
Bifidobacterium breve DSM 20213 = JCM 1192 DNA	Bacteria	Actinobacteria	Bifidobacteriales	0	0	0	0	0	0	0	0	0	0	0	0	0	0	0	0	0	0	1	1	0	1	0	1	1	1	0	0	0	1	0	1	1	1	0	0	0
Bifidobacterium breve strain BR3	Bacteria	Actinobacteria	Bifidobacteriales	0	0	0	0	0	0	0	0	0	0	0	0	0	0	0	0	0	0	1	1	0	1	0	1	1	1	0	0	0	1	0	1	1	1	0	0	0
Bifidobacterium catenulatum DSM 16992 = JCM 1194 = LMG 11043 DNA	Bacteria	Actinobacteria	Bifidobacteriales	0	0	0	0	1	0	0	0	0	0	0	0	0	0	0	0	0	0	1	1	0	1	0	1	1	1	0	0	0	1	0	1	1	1	0	0	0
Bifidobacterium coryneforme strain LMG18911	Bacteria	Actinobacteria	Bifidobacteriales	0	0	0	0	0	0	0	0	0	0	0	0	0	0	0	0	0	0	1	1	0	1	0	1	1	1	0	0	0	1	0	1	1	1	0	0	0
Bifidobacterium dentium Bd1	Bacteria	Actinobacteria	Bifidobacteriales	0	0	1	0	0	0	0	0	0	0	0	0	0	0	0	0	0	0	1	1	0	1	0	1	1	1	0	0	0	1	0	1	1	1	0	0	0
Bifidobacterium dentium JCM 1195 = DSM 20436 DNA	Bacteria	Actinobacteria	Bifidobacteriales	0	0	1	0	0	0	0	0	0	0	0	0	0	0	0	0	0	0	1	1	0	1	0	1	1	1	0	0	0	1	0	1	1	1	0	0	0
Bifidobacterium indicum LMG 11587 = DSM 20214	Bacteria	Actinobacteria	Bifidobacteriales	0	0	0	0	0	0	0	0	0	0	0	0	0	0	0	0	0	0	1	1	0	1	0	1	1	1	0	0	0	1	0	1	0	1	0	0	0
Bifidobacterium kashiwanohense PV20-2	Bacteria	Actinobacteria	Bifidobacteriales	0	0	1	0	0	0	0	0	0	0	0	0	0	0	0	0	0	0	1	1	0	1	0	1	1	1	0	0	0	1	0	1	1	1	0	0	0
Bifidobacterium kashiwanohense JCM 15439 = DSM 21854 DNA	Bacteria	Actinobacteria	Bifidobacteriales	0	0	0	0	0	0	0	0	0	0	0	0	0	0	0	0	0	0	1	1	0	1	0	1	1	1	0	0	0	1	0	1	1	1	0	0	0
Bifidobacterium longum NCC2705 chromosome	Bacteria	Actinobacteria	Bifidobacteriales	0	0	0	0	0	0	0	0	0	0	0	0	0	0	0	0	0	0	1	1	0	1	0	1	1	1	0	0	0	1	0	1	1	1	0	0	0
Bifidobacterium longum DJO10A	Bacteria	Actinobacteria	Bifidobacteriales	0	0	0	0	0	0	0	0	0	0	0	0	0	0	0	0	0	0	1	1	0	1	0	1	1	1	0	0	0	1	0	1	1	1	0	0	0
Bifidobacterium longum subsp. infantis ATCC 15697	Bacteria	Actinobacteria	Bifidobacteriales	0	0	0	0	0	0	0	0	0	0	0	0	0	0	0	0	0	0	1	1	0	1	0	1	1	1	0	0	0	1	0	1	1	1	1	0	0
Bifidobacterium longum subsp. longum JDM301	Bacteria	Actinobacteria	Bifidobacteriales	0	0	0	0	0	0	0	0	0	0	0	0	0	0	0	0	0	0	1	1	0	1	0	1	1	1	0	0	0	1	0	1	1	1	0	0	0
Bifidobacterium longum subsp. longum BBMN68	Bacteria	Actinobacteria	Bifidobacteriales	0	0	0	0	1	0	0	0	0	0	0	0	0	0	0	0	0	0	1	1	0	1	0	1	1	1	0	0	0	1	0	1	1	1	0	0	0
Bifidobacterium longum subsp. longum JCM 1217 DNA	Bacteria	Actinobacteria	Bifidobacteriales	0	0	0	0	0	0	0	0	0	0	0	0	0	0	0	0	0	0	1	1	0	1	0	1	1	1	0	0	0	1	0	1	1	1	1	0	0
Bifidobacterium longum subsp. infantis 157F DNA	Bacteria	Actinobacteria	Bifidobacteriales	0	0	0	0	0	0	0	0	0	0	0	0	0	0	0	0	0	0	1	1	0	1	0	1	1	1	0	0	0	1	0	1	1	1	0	0	0
Bifidobacterium longum subsp. longum KACC 91563	Bacteria	Actinobacteria	Bifidobacteriales	0	0	0	0	0	0	0	0	0	0	0	0	0	0	0	0	0	0	1	1	0	1	0	1	1	1	0	0	0	1	0	1	1	1	1	0	0
Bifidobacterium longum subsp. infantis ATCC 15697 = JCM 1222 = DSM 20088 DNA	Bacteria	Actinobacteria	Bifidobacteriales	0	0	0	0	0	0	0	0	0	0	0	0	0	0	0	0	0	0	1	1	0	1	0	1	1	1	0	0	0	1	0	1	1	1	1	0	0
Bifidobacterium longum strain BXY01	Bacteria	Actinobacteria	Bifidobacteriales	0	0	0	0	0	0	0	0	0	0	0	0	0	0	0	0	0	0	1	1	0	1	0	1	1	1	0	0	0	1	0	1	1	1	0	0	0
Bifidobacterium longum subsp. longum GT15	Bacteria	Actinobacteria	Bifidobacteriales	0	0	0	0	0	0	0	0	0	0	0	0	0	0	0	0	0	0	1	1	0	1	0	1	1	1	0	0	0	1	0	1	1	1	0	0	0
Bifidobacterium longum DNA	Bacteria	Actinobacteria	Bifidobacteriales	0	0	0	0	0	0	0	0	0	0	0	0	0	0	0	0	0	0	1	1	0	1	0	1	1	1	0	0	0	1	0	1	1	1	0	0	0
Bifidobacterium longum subsp. infantis strain BT1	Bacteria	Actinobacteria	Bifidobacteriales	0	0	1	0	0	0	0	0	0	0	0	0	0	0	0	0	0	0	1	1	0	1	0	1	1	1	0	0	0	1	0	1	1	1	0	0	0
Bifidobacterium longum strain BG7	Bacteria	Actinobacteria	Bifidobacteriales	0	0	0	0	0	0	0	0	0	0	0	0	0	0	0	0	0	0	1	1	0	1	0	1	1	1	0	0	0	1	0	1	1	1	0	0	0
Bifidobacterium longum subsp. longum strain NCIMB8809	Bacteria	Actinobacteria	Bifidobacteriales	0	0	0	0	0	0	0	0	0	0	0	0	0	0	0	0	0	0	1	1	0	1	0	1	1	1	0	0	0	1	0	1	1	1	1	0	0
Bifidobacterium longum strain 35624	Bacteria	Actinobacteria	Bifidobacteriales	0	0	1	0	0	0	0	0	0	0	0	0	0	0	0	0	0	0	1	1	0	1	0	1	1	1	0	0	0	1	0	1	1	1	1	0	0
Bifidobacterium longum subsp. longum strain AH1206	Bacteria	Actinobacteria	Bifidobacteriales	0	0	0	0	0	0	0	0	0	0	0	0	0	0	0	0	0	0	1	1	0	1	0	1	1	1	0	0	0	1	0	1	1	1	0	0	0
Bifidobacterium pseudolongum PV8-2	Bacteria	Actinobacteria	Bifidobacteriales	0	0	0	0	0	0	0	0	0	0	0	0	0	0	0	0	0	0	1	1	0	1	0	1	1	1	0	0	0	1	0	1	1	1	0	0	0
Bifidobacterium pseudocatenulatum DSM 20438 = JCM 1200 = LMG 10505 DNA	Bacteria	Actinobacteria	Bifidobacteriales	0	0	1	0	0	0	0	0	0	0	0	0	0	0	0	0	0	0	1	1	0	1	0	1	1	1	0	0	0	1	0	1	1	1	0	0	0
Bifidobacterium scardovii JCM 12489 = DSM 13734 DNA	Bacteria	Actinobacteria	Bifidobacteriales	0	0	0	0	1	0	0	0	0	0	0	0	0	0	0	0	0	0	1	1	0	1	0	1	1	1	0	0	0	1	0	1	1	1	0	0	0
Bifidobacterium thermophilum RBL67	Bacteria	Actinobacteria	Bifidobacteriales	0	0	1	0	0	0	0	0	0	0	0	0	0	0	0	0	0	0	1	0	0	1	0	1	1	1	0	0	0	1	0	1	1	1	0	0	0
Bibersteinia trehalosi USDA-ARS-USMARC-192	Bacteria	Proteobacteria	Gammaproteobacteria	0	0	1	0	0	0	0	0	1	0	0	0	0	0	0	0	0	0	1	1	0	1	1	1	1	1	1	0	0	1	0	1	1	1	0	0	1
Bibersteinia trehalosi USDA-ARS-USMARC-188	Bacteria	Proteobacteria	Gammaproteobacteria	0	0	1	0	0	0	0	0	1	0	0	0	0	0	0	0	0	0	1	1	0	1	1	1	1	1	1	0	0	1	0	1	1	1	0	0	1
Bibersteinia trehalosi USDA-ARS-USMARC-189	Bacteria	Proteobacteria	Gammaproteobacteria	0	0	1	0	0	0	0	0	0	0	0	0	0	0	0	0	0	0	1	0	0	1	1	1	1	1	0	0	0	1	0	1	1	1	0	0	1
Bibersteinia trehalosi USDA-ARS-USMARC-190	Bacteria	Proteobacteria	Gammaproteobacteria	0	0	1	0	0	0	0	0	0	0	0	0	0	0	0	0	0	0	1	1	0	1	1	1	1	1	1	0	0	1	0	1	1	1	0	0	1
Blochmannia endosymbiont of Polyrhachis (Hedomyrma) turneri strain 675	Bacteria	Proteobacteria	Gammaproteobacteria	0	0	0	0	0	0	0	0	0	0	0	0	0	0	0	0	0	0	0	0	0	0	0	0	0	0	1	0	0	0	0	0	0	0	0	0	1
Blochmannia endosymbiont of Camponotus (Colobopsis) obliquus strain 757	Bacteria	Proteobacteria	Gammaproteobacteria	0	0	0	0	0	0	0	0	0	0	0	0	0	0	0	0	0	0	0	0	0	0	0	0	0	0	1	0	0	0	0	0	0	0	0	0	1
Blastococcus saxobsidens DD2 complete genome.	Bacteria	Actinobacteria	Geodermatophilales	0	0	0	0	0	0	0	0	0	0	0	0	0	0	0	0	0	1	1	1	0	1	0	1	1	1	0	0	0	1	0	1	1	1	0	1	1
Blattabacterium sp. (Blaberus giganteus)	Bacteria	Bacteroidetes	Flavobacteriia	0	0	0	0	0	0	0	0	0	0	0	0	0	0	0	0	0	0	1	0	0	1	0	0	0	0	0	0	0	0	0	0	0	1	1	0	0
Blattabacterium sp. (Nauphoeta cinerea)	Bacteria	Bacteroidetes	Flavobacteriia	0	0	0	0	0	0	0	0	0	0	0	0	0	0	0	0	0	0	1	0	0	1	0	0	0	0	0	0	0	0	0	0	0	1	0	0	0
Blattabacterium sp. (Cryptocercus punctulatus) str. Cpu	Bacteria	Bacteroidetes	Flavobacteriia	0	0	0	0	0	0	0	0	0	0	0	0	0	0	0	0	0	0	1	0	0	1	0	0	0	0	0	0	0	0	0	0	0	1	1	0	0
Blautia sp. YL58	Bacteria	Firmicutes	Clostridia	0	0	1	0	0	0	0	0	0	0	0	0	0	0	0	0	0	1	1	1	0	1	1	1	1	1	0	0	0	1	1	1	0	1	1	0	0
Blastomonas sp. RAC04	Bacteria	Proteobacteria	Alphaproteobacteria	0	0	0	0	0	0	0	0	0	0	0	0	0	0	0	0	0	1	1	0	0	1	1	1	1	1	1	0	0	1	0	1	1	1	1	0	0
Blattabacterium sp. (Panesthia angustipennis spadica) str. BPAA DNA	Bacteria	Bacteroidetes	Flavobacteriia	0	0	0	0	0	0	0	0	0	0	0	0	0	0	0	0	0	0	1	0	0	1	0	0	0	0	0	0	0	0	0	0	0	1	0	0	0
Blattabacterium sp. (Periplaneta americana) str. BPLAN	Bacteria	Bacteroidetes	Flavobacteriia	0	0	0	0	0	0	0	0	0	0	0	0	0	0	0	0	0	0	1	0	0	1	0	0	0	0	0	0	0	0	0	0	0	1	1	0	0
Blattabacterium sp. (Blatta orientalis) str. Tarazona	Bacteria	Bacteroidetes	Flavobacteriia	0	0	0	0	0	0	0	0	0	0	0	0	0	0	0	0	0	0	1	0	0	0	0	0	0	0	0	0	0	0	0	0	0	1	1	0	0
Blattabacterium sp. (Mastotermes darwiniensis) str. MADAR	Bacteria	Bacteroidetes	Flavobacteriia	0	0	0	0	0	0	0	0	0	0	0	0	0	0	0	0	0	0	1	0	0	1	0	0	0	0	0	0	0	0	0	0	0	1	1	0	0
Blattabacterium sp. (Blattella germanica) str. Bge	Bacteria	Bacteroidetes	Flavobacteriia	0	0	0	0	0	0	0	0	0	0	0	0	0	0	0	0	0	0	1	0	0	0	0	0	0	0	0	0	0	0	0	0	0	1	0	0	0
Blastochloris viridis strain ATCC 19567	Bacteria	Proteobacteria	Alphaproteobacteria	0	0	1	0	0	0	0	0	0	0	0	0	0	1	0	0	0	0	1	0	0	1	1	1	0	0	0	0	0	1	0	1	1	1	1	0	0
Blastochloris viridis genome assembly Blastochloris viridis genome	Bacteria	Proteobacteria	Alphaproteobacteria	0	0	1	0	0	0	0	0	0	0	0	0	0	1	0	0	0	0	1	0	0	1	1	1	0	0	0	0	0	1	0	1	1	1	1	0	0
Blastochloris viridis DNA	Bacteria	Proteobacteria	Alphaproteobacteria	0	0	1	0	0	0	0	0	0	0	0	0	0	1	0	0	0	0	1	0	0	1	1	1	0	0	0	0	0	1	0	1	1	1	1	0	0
Borrelia afzelii PKo	Bacteria	Spirochaetes	Spirochaetales	0	0	0	0	0	0	0	0	0	0	0	0	0	0	0	0	0	0	1	0	0	1	1	0	0	0	0	1	0	0	0	0	0	1	0	0	1
Borrelia afzelii HLJ01	Bacteria	Spirochaetes	Spirochaetales	0	0	0	0	0	0	0	0	0	0	0	0	0	0	0	0	0	0	1	0	0	1	1	0	0	0	0	1	0	0	0	0	0	1	0	0	0
Borrelia afzelii Tom3107	Bacteria	Spirochaetes	Spirochaetales	0	0	0	0	0	0	0	0	0	0	0	0	0	0	0	0	0	0	1	0	0	1	1	0	0	0	0	1	0	0	0	0	0	0	0	0	1
Borrelia afzelii K78	Bacteria	Spirochaetes	Spirochaetales	0	0	0	0	0	0	0	0	0	0	0	0	0	0	0	0	0	0	1	0	0	1	1	0	0	0	0	1	0	0	0	0	0	1	0	0	1
Bordetella avium 197N complete genome.	Bacteria	Proteobacteria	Betaproteobacteria	0	0	0	0	0	0	0	0	0	0	0	0	0	0	0	0	0	0	1	0	0	1	1	1	1	1	0	0	0	1	0	1	1	1	1	0	0
Borrelia garinii PBi	Bacteria	Spirochaetes	Spirochaetales	0	0	0	0	0	0	0	0	0	0	0	0	0	0	0	0	0	0	1	0	0	1	1	0	0	0	0	1	0	0	0	0	0	1	0	0	1
Borrelia bissettii DN127	Bacteria	Spirochaetes	Spirochaetales	0	0	0	0	0	0	0	0	0	0	0	0	0	0	0	0	0	0	1	0	0	1	1	0	0	0	0	1	0	0	0	0	0	1	0	0	1
Bordetella bronchialis strain AU3182	Bacteria	Proteobacteria	Betaproteobacteria	0	0	0	0	0	0	0	0	0	0	0	0	0	0	0	0	0	1	1	0	0	1	1	1	1	1	0	0	0	1	0	1	1	1	0	0	1
Bordetella bronchialis strain AU17976	Bacteria	Proteobacteria	Betaproteobacteria	0	0	0	0	0	0	0	0	0	0	0	0	0	0	0	0	0	1	1	0	0	1	1	1	1	1	0	0	0	1	0	1	1	1	0	0	1
Bordetella bronchiseptica strain RB50	Bacteria	Proteobacteria	Betaproteobacteria	0	0	0	0	0	0	0	0	0	0	0	0	0	0	0	0	0	1	1	0	0	1	1	1	1	1	0	0	0	1	0	1	1	1	1	0	0
Bordetella bronchiseptica MO149 complete genome.	Bacteria	Proteobacteria	Betaproteobacteria	0	0	0	0	0	0	0	0	0	0	0	0	0	0	0	0	0	1	1	0	0	1	1	1	1	1	0	0	0	1	0	1	1	1	1	0	0
Bordetella bronchiseptica 253	Bacteria	Proteobacteria	Betaproteobacteria	0	0	0	0	0	0	0	0	0	0	0	0	0	0	0	0	0	1	1	0	0	1	1	1	1	1	0	0	0	1	0	1	1	1	1	0	0
Bordetella bronchiseptica DNA	Bacteria	Proteobacteria	Betaproteobacteria	0	0	0	0	0	0	0	0	0	0	0	0	0	0	0	0	0	1	1	0	0	1	1	1	1	1	0	0	0	1	0	1	1	1	1	0	0
Bordetella bronchiseptica strain I328	Bacteria	Proteobacteria	Betaproteobacteria	0	0	0	0	0	0	0	0	0	0	0	0	0	0	0	0	0	1	1	0	0	1	1	1	1	1	0	0	0	1	0	1	1	1	1	0	0
Borrelia burgdorferi B31 chromosome	Bacteria	Spirochaetes	Spirochaetales	0	0	0	0	0	0	0	0	0	0	0	0	0	0	0	0	0	0	1	0	0	1	1	0	0	0	0	1	0	0	0	0	0	1	0	0	1
Borrelia burgdorferi ZS7	Bacteria	Spirochaetes	Spirochaetales	0	0	0	0	0	0	0	0	0	0	0	0	0	0	0	0	0	0	1	0	0	1	1	0	0	0	0	1	0	0	0	0	0	1	0	0	1
Borrelia burgdorferi N40	Bacteria	Spirochaetes	Spirochaetales	0	0	0	0	0	0	0	0	0	0	0	0	0	0	0	0	0	0	1	0	0	1	1	0	0	0	0	1	0	0	0	0	0	1	0	0	1
Borrelia burgdorferi JD1	Bacteria	Spirochaetes	Spirochaetales	0	0	0	0	0	0	0	0	0	0	0	0	0	0	0	0	0	0	1	0	0	1	1	0	0	0	0	1	0	0	0	0	0	1	0	0	1
Borrelia burgdorferi CA382	Bacteria	Spirochaetes	Spirochaetales	0	0	0	0	0	0	0	0	0	0	0	0	0	0	0	0	0	0	1	0	0	1	1	0	0	0	0	1	0	0	0	0	0	1	0	0	1
Borrelia duttonii Ly	Bacteria	Spirochaetes	Spirochaetales	0	0	0	0	0	0	0	0	0	0	0	0	0	0	0	0	0	0	1	1	0	1	1	1	0	0	0	1	0	0	0	0	0	1	0	0	1
Bordetella flabilis strain AU10664	Bacteria	Proteobacteria	Betaproteobacteria	0	0	0	0	0	0	0	0	0	0	0	0	0	0	0	0	0	1	1	0	0	1	1	1	1	1	0	0	0	1	0	1	1	1	0	0	0
Borrelia garinii BgVir chromosome linear	Bacteria	Spirochaetes	Spirochaetales	0	0	0	0	0	0	0	0	0	0	0	0	0	0	0	0	0	0	1	0	0	1	1	0	0	0	0	1	0	0	0	0	0	1	0	0	1
Borrelia garinii NMJW1	Bacteria	Spirochaetes	Spirochaetales	0	0	0	0	0	0	0	0	0	0	0	0	0	0	0	0	0	0	0	0	0	1	1	0	0	0	0	1	0	0	0	0	0	1	0	0	0
Borrelia garinii SZ	Bacteria	Spirochaetes	Spirochaetales	0	0	0	0	0	0	0	0	0	0	0	0	0	0	0	0	0	0	0	0	0	1	1	0	0	0	0	1	0	0	0	0	0	1	0	0	1
Borrelia hermsii CC1	Bacteria	Spirochaetes	Spirochaetales	0	0	0	0	0	0	0	0	0	0	0	0	0	0	0	0	0	0	1	1	0	1	1	1	0	0	0	1	0	0	0	1	0	1	0	0	1
Borrelia hermsii HS1 isolate Browne Mountain	Bacteria	Spirochaetes	Spirochaetales	0	0	0	0	0	0	0	0	0	0	0	0	0	0	0	0	0	0	1	1	0	1	1	1	0	0	0	1	0	0	0	1	0	1	0	0	1
Bordetella hinzii strain F582	Bacteria	Proteobacteria	Betaproteobacteria	0	0	0	0	0	0	0	0	0	0	0	0	0	0	0	0	0	1	1	0	0	1	1	1	1	1	0	0	0	1	0	1	1	1	1	0	0
Bordetella hinzii strain H568	Bacteria	Proteobacteria	Betaproteobacteria	0	0	0	0	0	0	0	0	0	0	0	0	0	0	0	0	0	1	1	0	0	1	1	1	1	1	0	0	0	1	0	1	1	1	1	0	0
Bordetella holmesii F627	Bacteria	Proteobacteria	Betaproteobacteria	0	0	0	0	0	0	0	0	0	0	0	0	0	0	0	0	0	1	1	0	0	1	1	1	1	1	0	0	0	1	0	1	1	1	1	0	0
Bordetella holmesii H558	Bacteria	Proteobacteria	Betaproteobacteria	0	0	0	0	0	0	0	0	0	0	0	0	0	0	0	0	0	1	1	0	0	1	1	1	1	1	0	0	0	1	0	1	1	1	1	0	0
Bordetella holmesii ATCC 51541	Bacteria	Proteobacteria	Betaproteobacteria	0	0	0	0	0	0	0	0	0	0	0	0	0	0	0	0	0	1	1	0	0	1	0	0	1	0	0	0	0	1	0	1	1	1	0	0	0
Bordetella holmesii 44057	Bacteria	Proteobacteria	Betaproteobacteria	0	0	0	0	0	0	0	0	0	0	0	0	0	0	0	0	0	1	1	0	0	1	1	1	1	1	0	0	0	0	0	1	1	1	0	0	0
Bordetella holmesii strain H903	Bacteria	Proteobacteria	Betaproteobacteria	0	0	0	0	0	0	0	0	0	0	0	0	0	0	0	0	0	1	1	0	0	1	1	1	1	1	0	0	0	1	0	1	1	1	1	0	0
Borrelia miyamotoi LB-2001	Bacteria	Spirochaetes	Spirochaetales	0	0	0	0	0	0	0	0	0	0	0	0	0	0	0	0	0	0	1	1	0	1	1	1	0	0	0	1	0	0	0	1	1	1	0	0	1
Borrelia miyamotoi strain CT14D4	Bacteria	Spirochaetes	Spirochaetales	0	0	0	0	0	0	0	0	0	0	0	0	0	0	0	0	0	0	1	1	0	1	1	1	0	0	0	1	0	0	0	1	1	1	0	0	1
Borrelia parkeri HR1	Bacteria	Spirochaetes	Spirochaetales	0	0	0	0	0	0	0	0	0	0	0	0	0	0	0	0	0	0	1	1	0	1	1	1	0	0	0	1	0	0	0	1	1	1	0	0	1
Bordetella parapertussis strain 12822	Bacteria	Proteobacteria	Betaproteobacteria	0	0	0	0	0	0	0	0	0	0	0	0	0	0	0	0	0	1	1	0	0	1	1	1	1	1	0	0	0	1	0	1	1	1	1	0	0
Bordetella parapertussis Bpp5	Bacteria	Proteobacteria	Betaproteobacteria	0	0	0	0	0	0	0	0	0	0	0	0	0	0	0	0	0	0	1	0	0	1	1	1	1	1	0	1	0	1	0	1	1	1	1	0	0
Bordetella parapertussis strain H904	Bacteria	Proteobacteria	Betaproteobacteria	0	0	0	0	0	0	0	0	0	0	0	0	0	0	0	0	0	1	1	0	0	1	1	1	1	1	0	0	0	1	0	1	1	1	1	0	0
Bordetella pertussis B1917	Bacteria	Proteobacteria	Betaproteobacteria	0	0	0	0	0	0	0	0	0	0	0	0	0	0	0	0	0	0	1	0	0	1	1	1	1	1	0	0	0	1	0	1	1	1	1	0	0
Bordetella pertussis Tohama I chromosome	Bacteria	Proteobacteria	Betaproteobacteria	0	0	0	0	0	0	0	0	0	0	0	0	0	0	0	0	0	0	1	0	0	1	1	1	1	1	0	0	0	1	0	1	1	1	1	0	0
Bordetella pertussis CS	Bacteria	Proteobacteria	Betaproteobacteria	0	0	0	0	0	0	0	0	0	0	0	0	0	0	0	0	0	0	1	0	0	1	1	1	1	1	0	0	0	1	0	1	1	1	1	0	0
Bordetella pertussis 18323 complete genome.	Bacteria	Proteobacteria	Betaproteobacteria	0	0	0	0	0	0	0	0	0	0	0	0	0	0	0	0	0	0	1	0	0	1	1	1	1	1	0	0	0	1	0	1	1	1	1	0	0
Bordetella pertussis 137	Bacteria	Proteobacteria	Betaproteobacteria	0	0	0	0	0	0	0	0	0	0	0	0	0	0	0	0	0	0	1	0	0	1	1	1	1	1	0	0	0	1	0	1	1	1	1	0	0
Bordetella pertussis genome assembly BPD420	Bacteria	Proteobacteria	Betaproteobacteria	0	0	0	0	0	0	0	0	0	0	0	0	0	0	0	0	0	0	1	0	0	1	1	1	1	1	0	0	0	1	0	1	1	1	1	0	0
Bordetella pertussis strain B3629.	Bacteria	Proteobacteria	Betaproteobacteria	0	0	0	0	0	0	0	0	0	0	0	0	0	0	0	0	0	0	1	0	0	1	1	1	1	1	0	0	0	1	0	1	1	1	1	0	0
Bordetella pertussis strain B3621.	Bacteria	Proteobacteria	Betaproteobacteria	0	0	0	0	0	0	0	0	0	0	0	0	0	0	0	0	0	0	1	0	0	1	1	1	1	1	0	0	0	1	0	1	1	1	1	0	0
Bordetella pertussis strain B1838	Bacteria	Proteobacteria	Betaproteobacteria	0	0	0	0	0	0	0	0	0	0	0	0	0	0	0	0	0	0	1	0	0	1	1	1	1	1	0	0	0	1	0	1	1	1	1	0	0
Bordetella pertussis strain B1865	Bacteria	Proteobacteria	Betaproteobacteria	0	0	0	0	0	0	0	0	0	0	0	0	0	0	0	0	0	0	1	0	0	1	1	1	1	1	0	0	0	1	0	1	1	1	1	0	0
Bordetella pertussis strain B3405	Bacteria	Proteobacteria	Betaproteobacteria	0	0	0	0	0	0	0	0	0	0	0	0	0	0	0	0	0	0	1	0	0	1	1	1	1	1	0	0	0	1	0	1	1	1	1	0	0
Bordetella pertussis strain B3582	Bacteria	Proteobacteria	Betaproteobacteria	0	0	0	0	0	0	0	0	0	0	0	0	0	0	0	0	0	0	1	0	0	1	1	1	1	1	0	0	0	1	0	1	1	1	1	0	0
Bordetella pertussis strain B3585	Bacteria	Proteobacteria	Betaproteobacteria	0	0	0	0	0	0	0	0	0	0	0	0	0	0	0	0	0	0	1	0	0	1	1	1	1	1	0	0	0	1	0	1	1	1	1	0	0
Bordetella pertussis strain B3640	Bacteria	Proteobacteria	Betaproteobacteria	0	0	0	0	0	0	0	0	0	0	0	0	0	0	0	0	0	0	1	0	0	1	1	1	1	1	0	0	0	1	0	1	1	1	1	0	0
Bordetella pertussis strain B3658	Bacteria	Proteobacteria	Betaproteobacteria	0	0	0	0	0	0	0	0	0	0	0	0	0	0	0	0	0	0	1	0	0	1	1	1	1	1	0	0	0	1	0	1	1	1	1	0	0
Bordetella pertussis strain B3913	Bacteria	Proteobacteria	Betaproteobacteria	0	0	0	0	0	0	0	0	0	0	0	0	0	0	0	0	0	0	1	0	0	1	1	1	1	1	0	0	0	1	0	1	1	1	1	0	0
Bordetella pertussis strain B3921	Bacteria	Proteobacteria	Betaproteobacteria	0	0	0	0	0	0	0	0	0	0	0	0	0	0	0	0	0	0	1	0	0	1	1	1	1	1	0	0	0	1	0	1	1	1	1	0	0
Bordetella pertussis strain H321	Bacteria	Proteobacteria	Betaproteobacteria	0	0	0	0	0	0	0	0	0	0	0	0	0	0	0	0	0	0	1	0	0	1	1	1	1	1	0	0	0	1	0	1	1	1	1	0	0
Bordetella pertussis strain I979	Bacteria	Proteobacteria	Betaproteobacteria	0	0	0	0	0	0	0	0	0	0	0	0	0	0	0	0	0	0	1	0	0	1	1	1	1	1	0	0	0	1	0	1	1	1	1	0	0
Bordetella pertussis strain H374	Bacteria	Proteobacteria	Betaproteobacteria	0	0	0	0	0	0	0	0	0	0	0	0	0	0	0	0	0	0	1	0	0	1	1	1	1	1	0	0	0	1	0	1	1	1	1	0	0
Bordetella pertussis strain H378	Bacteria	Proteobacteria	Betaproteobacteria	0	0	0	0	0	0	0	0	0	0	0	0	0	0	0	0	0	0	1	0	0	1	1	1	1	1	0	0	0	1	0	1	1	1	1	0	0
Bordetella pertussis strain H379	Bacteria	Proteobacteria	Betaproteobacteria	0	0	0	0	0	0	0	0	0	0	0	0	0	0	0	0	0	0	1	0	0	1	1	1	1	1	0	0	0	1	0	1	1	1	1	0	0
Bordetella pertussis strain H380	Bacteria	Proteobacteria	Betaproteobacteria	0	0	0	0	0	0	0	0	0	0	0	0	0	0	0	0	0	0	1	0	0	1	1	1	1	1	0	0	0	1	0	1	1	1	1	0	0
Bordetella pertussis strain H559	Bacteria	Proteobacteria	Betaproteobacteria	0	0	0	0	0	0	0	0	0	0	0	0	0	0	0	0	0	0	1	0	0	1	1	1	1	1	0	0	0	1	0	1	1	1	1	0	0
Bordetella pertussis strain H375	Bacteria	Proteobacteria	Betaproteobacteria	0	0	0	0	0	0	0	0	0	0	0	0	0	0	0	0	0	0	1	0	0	1	1	1	1	1	0	0	0	1	0	1	1	1	1	0	0
Bordetella pertussis strain H627	Bacteria	Proteobacteria	Betaproteobacteria	0	0	0	0	0	0	0	0	0	0	0	0	0	0	0	0	0	0	1	0	0	1	1	1	1	1	0	0	0	1	0	1	1	1	1	0	0
Bordetella pertussis strain H489	Bacteria	Proteobacteria	Betaproteobacteria	0	0	0	0	0	0	0	0	0	0	0	0	0	0	0	0	0	0	1	0	0	1	1	1	1	1	0	0	0	1	0	1	1	1	1	0	0
Bordetella pertussis strain H542	Bacteria	Proteobacteria	Betaproteobacteria	0	0	0	0	0	0	0	0	0	0	0	0	0	0	0	0	0	0	1	0	0	1	1	1	1	1	0	0	0	1	0	1	1	1	1	0	0
Bordetella pertussis strain H561	Bacteria	Proteobacteria	Betaproteobacteria	0	0	0	0	0	0	0	0	0	0	0	0	0	0	0	0	0	0	1	0	0	1	1	1	1	1	0	0	0	1	0	1	1	1	1	0	0
Bordetella pertussis strain H563	Bacteria	Proteobacteria	Betaproteobacteria	0	0	0	0	0	0	0	0	0	0	0	0	0	0	0	0	0	0	1	0	0	1	1	1	1	1	0	0	0	1	0	1	1	1	1	0	0
Bordetella pertussis strain H622	Bacteria	Proteobacteria	Betaproteobacteria	0	0	0	0	0	0	0	0	0	0	0	0	0	0	0	0	0	0	1	0	0	1	1	1	1	1	0	0	0	1	0	1	1	1	1	0	0
Bordetella pertussis strain C393	Bacteria	Proteobacteria	Betaproteobacteria	0	0	0	0	0	0	0	0	0	0	0	0	0	0	0	0	0	0	1	0	0	1	1	1	1	1	0	0	0	1	0	1	1	1	1	0	0
Bordetella pertussis strain E476	Bacteria	Proteobacteria	Betaproteobacteria	0	0	0	0	0	0	0	0	0	0	0	0	0	0	0	0	0	0	1	0	0	1	1	1	1	1	0	0	0	1	0	1	1	1	1	0	0
Bordetella pertussis strain H564	Bacteria	Proteobacteria	Betaproteobacteria	0	0	0	0	0	0	0	0	0	0	0	0	0	0	0	0	0	0	1	0	0	1	1	1	1	1	0	0	0	1	0	1	1	1	1	0	0
Bordetella pertussis strain H788	Bacteria	Proteobacteria	Betaproteobacteria	0	0	0	0	0	0	0	0	0	0	0	0	0	0	0	0	0	0	1	0	0	1	1	1	1	1	0	0	0	1	0	1	1	1	1	0	0
Bordetella pertussis strain I468	Bacteria	Proteobacteria	Betaproteobacteria	0	0	0	0	0	0	0	0	0	0	0	0	0	0	0	0	0	0	1	0	0	1	1	1	1	1	0	0	0	1	0	1	1	1	1	0	0
Bordetella pertussis strain I469	Bacteria	Proteobacteria	Betaproteobacteria	0	0	0	0	0	0	0	0	0	0	0	0	0	0	0	0	0	0	1	0	0	1	1	1	1	1	0	0	0	1	0	1	1	1	1	0	0
Bordetella pertussis strain I472	Bacteria	Proteobacteria	Betaproteobacteria	0	0	0	0	0	0	0	0	0	0	0	0	0	0	0	0	0	0	1	0	0	1	1	1	1	1	0	0	0	1	0	1	1	1	1	0	0
Bordetella pertussis strain I476	Bacteria	Proteobacteria	Betaproteobacteria	0	0	0	0	0	0	0	0	0	0	0	0	0	0	0	0	0	0	1	0	0	1	1	1	1	1	0	0	0	1	0	1	1	1	1	0	0
Bordetella pertussis strain I480	Bacteria	Proteobacteria	Betaproteobacteria	0	0	0	0	0	0	0	0	0	0	0	0	0	0	0	0	0	0	1	0	0	1	1	1	1	1	0	0	0	1	0	1	1	1	1	0	0
Bordetella pertussis strain I483	Bacteria	Proteobacteria	Betaproteobacteria	0	0	0	0	0	0	0	0	0	0	0	0	0	0	0	0	0	0	1	0	0	1	1	1	1	1	0	0	0	1	0	1	1	1	1	0	0
Bordetella pertussis strain I496	Bacteria	Proteobacteria	Betaproteobacteria	0	0	0	0	0	0	0	0	0	0	0	0	0	0	0	0	0	0	1	0	0	1	1	1	1	1	0	0	0	1	0	1	1	1	1	0	0
Bordetella pertussis strain I498	Bacteria	Proteobacteria	Betaproteobacteria	0	0	0	0	0	0	0	0	0	0	0	0	0	0	0	0	0	0	1	0	0	1	1	1	1	1	0	0	0	1	0	1	1	1	1	0	0
Bordetella pertussis strain I518	Bacteria	Proteobacteria	Betaproteobacteria	0	0	0	0	0	0	0	0	0	0	0	0	0	0	0	0	0	0	1	0	0	1	1	1	1	1	0	0	0	1	0	1	1	1	1	0	0
Bordetella pertussis strain I521	Bacteria	Proteobacteria	Betaproteobacteria	0	0	0	0	0	0	0	0	0	0	0	0	0	0	0	0	0	0	1	0	0	1	1	1	1	1	0	0	0	1	0	1	1	1	1	0	0
Bordetella pertussis strain I538	Bacteria	Proteobacteria	Betaproteobacteria	0	0	0	0	0	0	0	0	0	0	0	0	0	0	0	0	0	0	1	0	0	1	1	1	1	1	0	0	0	1	0	1	1	1	1	0	0
Bordetella pertussis strain I539	Bacteria	Proteobacteria	Betaproteobacteria	0	0	0	0	0	0	0	0	0	0	0	0	0	0	0	0	0	0	1	0	0	1	1	1	1	1	0	0	0	1	0	1	1	1	1	0	0
Bordetella pertussis strain I646	Bacteria	Proteobacteria	Betaproteobacteria	0	0	0	0	0	0	0	0	0	0	0	0	0	0	0	0	0	0	1	0	0	1	1	1	1	1	0	0	0	1	0	1	1	1	1	0	0
Bordetella pertussis strain I656	Bacteria	Proteobacteria	Betaproteobacteria	0	0	0	0	0	0	0	0	0	0	0	0	0	0	0	0	0	0	1	0	0	1	1	1	1	1	0	0	0	1	0	1	1	1	1	0	0
Bordetella pertussis strain I669	Bacteria	Proteobacteria	Betaproteobacteria	0	0	0	0	0	0	0	0	0	0	0	0	0	0	0	0	0	0	1	0	0	1	1	1	1	1	0	0	0	1	0	1	1	1	1	0	0
Bordetella pertussis strain I707	Bacteria	Proteobacteria	Betaproteobacteria	0	0	0	0	0	0	0	0	0	0	0	0	0	0	0	0	0	0	1	0	0	1	1	1	1	1	0	0	0	1	0	1	1	1	1	0	0
Bordetella pertussis strain I344	Bacteria	Proteobacteria	Betaproteobacteria	0	0	0	0	0	0	0	0	0	0	0	0	0	0	0	0	0	0	1	0	0	1	1	1	1	1	0	0	0	1	0	1	1	1	1	0	0
Bordetella pertussis strain VA-190	Bacteria	Proteobacteria	Betaproteobacteria	0	0	0	0	0	0	0	0	0	0	0	0	0	0	0	0	0	0	1	0	0	1	1	1	1	1	0	0	0	1	0	1	1	1	1	0	0
Bordetella pertussis strain VA-194	Bacteria	Proteobacteria	Betaproteobacteria	0	0	0	0	0	0	0	0	0	0	0	0	0	0	0	0	0	0	1	0	0	1	1	1	1	1	0	0	0	1	0	1	1	1	1	0	0
Bordetella pertussis strain VA-175	Bacteria	Proteobacteria	Betaproteobacteria	0	0	0	0	0	0	0	0	0	0	0	0	0	0	0	0	0	0	1	0	0	1	1	1	1	1	0	0	0	1	0	1	1	1	1	0	0
Bordetella pertussis strain VA-150	Bacteria	Proteobacteria	Betaproteobacteria	0	0	0	0	0	0	0	0	0	0	0	0	0	0	0	0	0	0	1	0	0	1	1	1	1	1	0	0	0	1	0	1	1	0	1	0	0
Bordetella pertussis strain VA-52	Bacteria	Proteobacteria	Betaproteobacteria	0	0	0	0	0	0	0	0	0	0	0	0	0	0	0	0	0	0	1	0	0	1	1	1	1	1	0	0	0	1	0	1	1	1	1	0	0
Bordetella pertussis strain VA-09	Bacteria	Proteobacteria	Betaproteobacteria	0	0	0	0	0	0	0	0	0	0	0	0	0	0	0	0	0	0	1	0	0	1	1	1	1	1	0	0	0	1	0	1	1	1	1	0	0
Bordetella pertussis strain VA-15	Bacteria	Proteobacteria	Betaproteobacteria	0	0	0	0	0	0	0	0	0	0	0	0	0	0	0	0	0	0	1	0	0	1	1	1	1	1	0	0	0	1	0	1	1	1	1	0	0
Bordetella pertussis strain VA-18	Bacteria	Proteobacteria	Betaproteobacteria	0	0	0	0	0	0	0	0	0	0	0	0	0	0	0	0	0	0	1	0	0	1	1	1	1	1	0	0	0	1	0	1	1	1	1	0	0
Bordetella pertussis strain VA-62	Bacteria	Proteobacteria	Betaproteobacteria	0	0	0	0	0	0	0	0	0	0	0	0	0	0	0	0	0	0	1	0	0	1	1	1	1	1	0	0	0	1	0	1	1	1	1	0	0
Bordetella pertussis strain VA-145	Bacteria	Proteobacteria	Betaproteobacteria	0	0	0	0	0	0	0	0	0	0	0	0	0	0	0	0	0	0	1	0	0	1	1	1	1	1	0	0	0	1	0	1	1	1	1	0	0
Bordetella pertussis strain VA-010	Bacteria	Proteobacteria	Betaproteobacteria	0	0	0	0	0	0	0	0	0	0	0	0	0	0	0	0	0	0	1	0	0	1	1	1	1	1	0	0	0	1	0	1	1	1	1	0	0
Bordetella pertussis strain VA-UT25Sm1	Bacteria	Proteobacteria	Betaproteobacteria	0	0	0	0	0	0	0	0	0	0	0	0	0	0	0	0	0	0	1	0	0	1	1	1	1	1	0	0	0	1	0	1	1	1	1	0	0
Bordetella pertussis strain B203	Bacteria	Proteobacteria	Betaproteobacteria	0	0	0	0	0	0	0	0	0	0	0	0	0	0	0	0	0	0	1	0	0	1	1	1	1	1	0	0	0	1	0	1	1	1	1	0	0
Bordetella pertussis strain B202	Bacteria	Proteobacteria	Betaproteobacteria	0	0	0	0	0	0	0	0	0	0	0	0	0	0	0	0	0	0	1	0	0	1	1	1	1	1	0	0	0	1	0	1	1	1	1	0	0
Bordetella pertussis strain J445	Bacteria	Proteobacteria	Betaproteobacteria	0	0	0	0	0	0	0	0	0	0	0	0	0	0	0	0	0	0	1	0	0	1	1	1	1	1	0	0	0	1	0	1	1	1	1	0	0
Bordetella pertussis strain J447	Bacteria	Proteobacteria	Betaproteobacteria	0	0	0	0	0	0	0	0	0	0	0	0	0	0	0	0	0	0	1	0	0	1	1	1	1	1	0	0	0	1	0	1	1	1	1	0	0
Bordetella pertussis strain J448	Bacteria	Proteobacteria	Betaproteobacteria	0	0	0	0	0	0	0	0	0	0	0	0	0	0	0	0	0	0	1	0	0	1	1	1	1	1	0	0	0	1	0	1	1	1	1	0	0
Bordetella petrii strain DSM 12804	Bacteria	Proteobacteria	Betaproteobacteria	0	0	0	0	0	0	0	0	0	0	0	0	0	0	0	0	0	1	1	0	0	1	1	1	1	1	0	0	0	1	0	1	1	1	1	0	0
Bordetella pseudohinzii strain HI4681	Bacteria	Proteobacteria	Betaproteobacteria	0	0	0	0	0	0	0	0	1	0	0	0	0	0	0	0	0	0	1	0	0	1	1	1	1	1	0	0	0	1	0	1	1	1	1	0	0
Borrelia recurrentis A1	Bacteria	Spirochaetes	Spirochaetales	0	0	0	0	0	0	0	0	0	0	0	0	0	0	0	0	0	0	0	1	0	1	1	1	0	0	0	1	0	0	0	0	0	1	0	0	1
Bordetella sp. H567	Bacteria	Proteobacteria	Betaproteobacteria	0	0	0	0	0	0	0	0	0	0	0	0	0	0	0	0	0	1	1	0	0	1	1	1	1	1	0	0	0	1	0	1	1	1	0	0	1
Bosea sp. PAMC 26642	Bacteria	Proteobacteria	Alphaproteobacteria	0	0	0	0	0	0	0	0	0	0	0	0	0	0	0	0	0	1	1	1	0	1	1	1	1	1	1	0	0	1	0	1	1	1	1	0	0
Bosea sp. RAC05	Bacteria	Proteobacteria	Alphaproteobacteria	0	0	0	0	1	0	0	0	0	0	0	0	0	0	0	0	0	0	1	1	0	1	1	1	1	1	1	0	0	1	0	1	1	1	1	0	0
Bordetella trematum strain H044680328 genome assembly	Bacteria	Proteobacteria	Betaproteobacteria	0	0	0	0	0	0	0	0	0	0	0	0	0	0	0	0	0	0	1	0	0	1	1	1	1	1	0	0	0	1	0	1	1	1	1	0	0
Borrelia turicatae 91E135	Bacteria	Spirochaetes	Spirochaetales	0	0	0	0	0	0	0	0	0	0	0	0	0	0	0	0	0	0	1	0	0	1	1	1	0	0	0	1	0	0	0	1	1	1	0	0	1
Bosea vaviloviae strain Vaf18	Bacteria	Proteobacteria	Alphaproteobacteria	0	0	0	0	0	0	0	0	0	0	0	0	0	0	0	0	0	1	1	1	0	1	1	1	1	1	0	0	0	1	0	1	1	1	1	0	0
Borrelia valaisiana Tom4006	Bacteria	Spirochaetes	Spirochaetales	0	0	0	0	0	0	0	0	0	0	0	0	0	0	0	0	0	0	1	0	0	1	1	0	0	0	0	1	0	0	0	0	0	1	0	0	1
Brucella abortus biovar 1 str. 9-941 chromosome I	Bacteria	Proteobacteria	Alphaproteobacteria	0	0	0	0	0	0	0	0	0	0	0	0	0	0	0	0	0	0	1	0	0	1	1	1	0	0	0	0	0	1	0	1	1	1	1	0	0
Brucella abortus S19 chromosome 1	Bacteria	Proteobacteria	Alphaproteobacteria	0	0	0	0	0	0	0	0	0	0	0	0	0	0	0	0	0	0	1	0	0	1	1	1	0	0	0	0	0	1	0	1	1	1	1	0	0
Brucella melitensis biovar Abortus 2308 chromosome I	Bacteria	Proteobacteria	Alphaproteobacteria	0	0	0	0	0	0	0	0	0	0	0	0	0	0	0	0	0	0	1	0	0	1	1	1	0	0	0	0	0	1	0	1	1	1	1	0	0
Brucella abortus A13334 chromosome 1	Bacteria	Proteobacteria	Alphaproteobacteria	0	0	0	0	0	0	0	0	0	0	0	0	0	0	0	0	0	0	1	0	0	1	1	1	0	0	0	0	0	1	0	1	1	1	1	0	0
Brucella abortus strain BDW chromosome 1	Bacteria	Proteobacteria	Alphaproteobacteria	0	0	0	0	0	0	0	0	0	0	0	0	0	0	0	0	0	0	1	0	0	1	1	1	0	0	0	0	0	1	0	1	1	1	1	0	0
Brucella abortus strain BER chromosome 1	Bacteria	Proteobacteria	Alphaproteobacteria	0	0	0	0	0	0	0	0	0	0	0	0	0	0	0	0	0	0	1	0	0	1	1	1	0	0	0	0	0	1	0	1	1	1	1	0	0
Brucella abortus strain NCTC 10505 chromosome 1 sequence.	Bacteria	Proteobacteria	Alphaproteobacteria	0	0	0	0	0	0	0	0	0	0	0	0	0	0	0	0	0	0	1	0	0	1	1	1	0	0	0	0	0	1	0	1	1	1	1	0	0
Brucella abortus bv. 9 str. C68 chromosome 1	Bacteria	Proteobacteria	Alphaproteobacteria	0	0	0	0	0	0	0	0	0	0	0	0	0	0	0	0	0	0	1	0	0	1	1	1	0	0	0	0	0	1	0	1	1	1	1	0	0
Brucella abortus bv. 6 str. 870 chromosome 1	Bacteria	Proteobacteria	Alphaproteobacteria	0	0	0	0	0	0	0	0	0	0	0	0	0	0	0	0	0	0	1	0	0	1	1	1	0	0	0	0	0	1	0	1	1	1	1	0	0
Brucella abortus strain 63 75 chromosome 1	Bacteria	Proteobacteria	Alphaproteobacteria	0	0	0	0	0	0	0	0	0	0	0	0	0	0	0	0	0	0	1	0	0	1	1	1	0	0	0	0	0	1	0	1	1	1	1	0	0
Brucella abortus strain BFY chromosome 1	Bacteria	Proteobacteria	Alphaproteobacteria	0	0	0	0	0	0	0	0	0	0	0	0	0	0	0	0	0	0	1	0	0	1	1	1	0	0	0	0	0	1	0	1	1	1	1	0	0
Brucella abortus bv. 2 str. 86/8/59 chromosome 1	Bacteria	Proteobacteria	Alphaproteobacteria	0	0	0	0	0	0	0	0	0	0	0	0	0	0	0	0	0	0	1	0	0	1	1	1	0	0	0	0	0	1	0	1	1	1	1	0	0
Brucella abortus strain BAB8416 chromosome 1	Bacteria	Proteobacteria	Alphaproteobacteria	0	0	0	0	0	0	0	0	0	0	0	0	0	0	0	0	0	0	1	0	0	1	1	1	0	0	0	0	0	1	0	1	1	1	1	0	0
Brucella abortus 104M chromosome 1	Bacteria	Proteobacteria	Alphaproteobacteria	0	0	0	0	0	0	0	0	0	0	0	0	0	0	0	0	0	0	1	0	0	1	1	1	0	0	0	0	0	1	0	1	1	1	1	0	0
Brevibacillus brevis NBRC 100599 DNA	Bacteria	Firmicutes	Bacillales	0	0	0	0	0	0	0	0	0	0	0	0	0	0	0	0	0	1	1	1	0	1	1	1	1	1	0	0	0	1	0	1	1	1	1	0	0
Brucella canis ATCC 23365 chromosome I	Bacteria	Proteobacteria	Alphaproteobacteria	0	0	0	0	0	0	0	0	0	0	0	0	0	0	0	0	0	0	1	0	0	1	1	1	0	0	0	0	0	1	0	1	1	1	1	0	0
Brucella canis HSK A52141 chromosome 1	Bacteria	Proteobacteria	Alphaproteobacteria	0	0	0	0	0	0	0	0	0	0	0	0	0	0	0	0	0	0	1	0	0	1	1	1	0	0	0	0	0	1	0	1	1	1	1	0	0
Brucella canis strain SVA13 chromosome 1	Bacteria	Proteobacteria	Alphaproteobacteria	0	0	0	0	0	0	0	0	0	0	0	0	0	0	0	0	0	0	1	0	0	1	1	1	0	0	0	0	0	1	0	1	1	1	1	0	0
Brucella canis strain RM6/66 chromosome 1	Bacteria	Proteobacteria	Alphaproteobacteria	0	0	0	0	0	0	0	0	0	0	0	0	0	0	0	0	0	0	1	0	0	1	1	1	0	0	0	0	0	1	0	1	1	1	1	0	0
Brucella canis strain 2009004498 chromosome 1	Bacteria	Proteobacteria	Alphaproteobacteria	0	0	0	0	0	0	0	0	0	0	0	0	0	0	0	0	0	0	1	0	0	1	1	1	0	0	0	0	0	1	0	1	1	1	1	0	0
Brucella canis strain 2010009751 chromosome 1	Bacteria	Proteobacteria	Alphaproteobacteria	0	0	0	0	0	0	0	0	0	0	0	0	0	0	0	0	0	0	1	0	0	1	1	1	0	0	0	0	0	1	0	1	1	1	1	0	0
Brucella ceti TE10759-12 chromosome 1	Bacteria	Proteobacteria	Alphaproteobacteria	0	0	0	0	0	0	0	0	0	0	0	0	0	0	0	0	0	0	1	0	0	1	1	1	0	0	0	0	0	1	0	1	1	1	1	0	0
Bradyrhizobium japonicum USDA 110 chromosome	Bacteria	Proteobacteria	Alphaproteobacteria	0	0	0	0	0	0	0	0	0	0	0	0	0	0	0	0	0	1	1	0	0	1	1	1	1	0	1	0	0	1	0	1	1	1	1	0	0
Bradyrhizobium diazoefficiens DNA	Bacteria	Proteobacteria	Alphaproteobacteria	0	0	0	0	0	0	0	0	0	0	0	0	0	0	0	0	0	1	0	0	0	1	1	1	0	0	0	0	0	1	0	1	1	1	1	0	0
Bradyrhizobium diazoefficiens USDA 110	Bacteria	Proteobacteria	Alphaproteobacteria	0	0	0	0	0	0	0	0	0	0	0	0	0	0	0	0	0	1	1	0	0	1	1	1	1	0	1	0	0	1	0	1	1	1	1	0	0
Brachybacterium faecium DSM 4810 chromosome	Bacteria	Actinobacteria	Micrococcales	0	0	0	0	0	0	0	0	0	0	0	0	0	0	0	0	0	1	1	1	0	1	0	1	1	1	0	1	0	1	0	1	1	1	0	1	0
Brevibacterium flavum strain ATCC 15168	Bacteria	Actinobacteria	Corynebacteriales	0	0	0	0	0	0	0	0	0	0	0	0	0	0	0	0	0	0	1	1	0	1	0	1	1	1	0	0	0	1	0	1	1	1	0	1	0
Brachyspira hyodysenteriae WA1	Bacteria	Spirochaetes	Brachyspirales	0	0	0	0	0	0	0	0	0	0	0	0	0	0	0	0	0	0	1	1	0	1	1	1	0	1	0	0	0	1	0	1	1	1	1	0	0
Brachyspira hyodysenteriae ATCC 27164	Bacteria	Spirochaetes	Brachyspirales	0	0	0	0	0	0	0	0	0	0	0	0	0	0	0	0	0	0	1	1	0	1	1	1	0	1	0	0	0	1	0	1	1	1	1	0	0
Bradyrhizobium icense strain LMTR 13	Bacteria	Proteobacteria	Alphaproteobacteria	0	0	0	0	0	0	0	0	0	0	0	0	0	0	0	0	0	1	1	0	0	1	1	1	1	0	0	0	0	1	0	1	1	1	1	0	0
Brachyspira intermedia PWS/A	Bacteria	Spirochaetes	Brachyspirales	0	0	0	0	0	0	0	0	0	0	0	0	0	0	0	0	0	0	1	1	0	1	1	1	0	1	0	0	0	1	0	1	1	1	1	0	0
Bradyrhizobium japonicum USDA 6 DNA	Bacteria	Proteobacteria	Alphaproteobacteria	0	0	0	0	0	0	0	0	0	0	0	0	0	0	0	0	0	1	1	0	0	1	1	1	1	0	1	0	0	1	0	1	1	1	1	0	0
Bradyrhizobium japonicum strain E109	Bacteria	Proteobacteria	Alphaproteobacteria	0	0	0	0	0	0	0	0	0	0	0	0	0	0	0	0	0	1	1	0	0	1	1	1	1	0	1	0	0	1	0	1	1	1	1	0	0
Brevibacillus laterosporus LMG 15441	Bacteria	Firmicutes	Bacillales	0	0	0	0	0	0	0	0	0	0	0	0	0	0	0	0	0	1	1	1	0	1	1	1	1	1	0	0	0	1	0	1	1	1	1	0	0
Brevibacterium linens strain BS258	Bacteria	Actinobacteria	Micrococcales	0	0	0	0	0	0	0	0	0	0	0	0	0	0	0	0	0	1	1	1	0	1	0	1	1	1	0	0	0	1	0	1	1	1	1	1	0
Brevibacterium linens strain SMQ-1335	Bacteria	Actinobacteria	Micrococcales	0	0	0	0	0	0	0	0	0	0	0	0	0	0	0	0	0	1	1	1	0	1	0	1	1	1	0	0	0	1	0	1	1	1	1	1	0
Brucella melitensis bv. 1 str. 16M chromosome I	Bacteria	Proteobacteria	Alphaproteobacteria	0	0	0	0	0	0	0	0	0	0	0	0	0	0	0	0	0	0	1	0	0	1	1	1	0	0	0	0	0	1	0	1	1	1	1	0	0
Brucella melitensis ATCC 23457 chromosome I	Bacteria	Proteobacteria	Alphaproteobacteria	0	0	0	0	0	0	0	0	0	0	0	0	0	0	0	0	0	0	1	0	0	1	1	1	0	0	0	0	0	1	0	1	1	1	1	0	0
Brucella melitensis M28 chromosome 1	Bacteria	Proteobacteria	Alphaproteobacteria	0	0	0	0	0	0	0	0	0	0	0	0	0	0	0	0	0	0	1	0	0	1	1	1	0	0	0	0	0	1	0	1	1	1	1	0	0
Brucella melitensis M5-90 chromosome I	Bacteria	Proteobacteria	Alphaproteobacteria	0	0	0	0	0	0	0	0	0	0	0	0	0	0	0	0	0	0	1	0	0	1	1	1	0	0	0	0	0	1	0	1	1	1	1	0	0
Brucella melitensis NI chromosome I	Bacteria	Proteobacteria	Alphaproteobacteria	0	0	0	0	0	0	0	0	0	0	0	0	0	0	0	0	0	0	1	0	0	1	1	1	0	0	0	0	0	1	0	1	1	1	1	0	0
Brucella melitensis bv. 3 str. Ether chromosome 1	Bacteria	Proteobacteria	Alphaproteobacteria	0	0	0	0	0	0	0	0	0	0	0	0	0	0	0	0	0	0	1	0	0	1	1	1	0	0	0	0	0	1	0	1	1	1	1	0	0
Brucella melitensis bv. 1 str. 16M chromosome 1	Bacteria	Proteobacteria	Alphaproteobacteria	0	0	0	0	0	0	0	0	0	0	0	0	0	0	0	0	0	0	1	0	0	1	1	1	0	0	0	0	0	1	0	1	1	1	1	0	0
Brucella melitensis strain 20236 chromosome 1	Bacteria	Proteobacteria	Alphaproteobacteria	0	0	0	0	0	0	0	0	0	0	0	0	0	0	0	0	0	0	1	0	0	1	1	1	0	0	0	0	0	1	0	1	1	1	1	0	0
Brucella melitensis strain 2008724259 chromosome 1	Bacteria	Proteobacteria	Alphaproteobacteria	0	0	0	0	0	0	0	0	0	0	0	0	0	0	0	0	0	0	1	0	0	1	1	1	0	0	0	0	0	1	0	1	1	1	1	0	0
Brucella microti CCM 4915 chromosome 1	Bacteria	Proteobacteria	Alphaproteobacteria	0	0	0	0	0	0	0	0	0	0	0	0	0	0	0	0	0	0	1	0	0	1	1	1	0	0	0	0	0	1	0	1	1	1	1	0	0
Brachyspira murdochii DSM 12563	Bacteria	Spirochaetes	Brachyspirales	0	1	0	0	0	0	0	0	0	0	0	0	0	0	0	0	0	0	1	1	0	1	1	1	0	1	0	0	0	1	0	1	1	1	1	0	0
Brevundimonas naejangsanensis strain B1	Bacteria	Proteobacteria	Alphaproteobacteria	0	0	0	0	0	0	0	0	0	0	0	0	0	0	0	0	0	1	1	0	0	1	1	1	1	0	0	0	0	1	0	1	1	1	1	0	0
Bradyrhizobium oligotrophicum S58 DNA	Bacteria	Proteobacteria	Alphaproteobacteria	0	0	0	0	0	0	0	0	0	0	0	0	0	0	0	0	0	1	1	0	0	1	1	1	1	0	1	0	0	1	0	1	1	1	1	0	0
Brucella ovis ATCC 25840 chromosome I	Bacteria	Proteobacteria	Alphaproteobacteria	0	0	0	0	0	0	0	0	0	0	0	0	0	0	0	0	0	0	1	0	0	1	1	1	0	0	0	0	0	1	0	1	1	1	1	0	0
Brucella pinnipedialis B2/94 chromosome 1	Bacteria	Proteobacteria	Alphaproteobacteria	0	0	0	0	0	0	0	0	0	0	0	0	0	0	0	0	0	0	1	0	0	1	1	1	0	0	0	0	0	1	0	1	1	1	1	0	0
Brucella pinnipedialis strain 6/566 chromosome 1	Bacteria	Proteobacteria	Alphaproteobacteria	0	0	0	0	0	0	0	0	0	0	0	0	0	0	0	0	0	0	1	0	0	1	1	1	0	0	0	0	0	1	0	1	1	1	1	0	0
Brachyspira pilosicoli 95/1000	Bacteria	Spirochaetes	Brachyspirales	0	0	0	0	0	0	0	0	0	0	0	0	0	0	0	0	0	0	1	1	0	1	1	1	0	1	0	0	0	1	0	1	1	1	0	0	0
Brachyspira pilosicoli B2904	Bacteria	Spirochaetes	Brachyspirales	0	0	0	0	0	0	0	0	0	0	0	0	0	0	0	0	0	0	1	1	0	1	1	1	0	1	0	0	0	0	0	1	1	1	0	0	0
Brachyspira pilosicoli P43/6/78	Bacteria	Spirochaetes	Brachyspirales	0	0	0	0	0	0	0	0	0	0	0	0	0	0	0	0	0	0	1	1	0	1	1	1	0	1	0	0	0	0	0	1	1	1	1	0	0
Bradyrhizobium sp. ORS278	Bacteria	Proteobacteria	Alphaproteobacteria	0	0	0	0	0	0	0	0	0	0	0	0	0	0	0	0	0	1	1	0	0	1	1	1	1	0	0	0	0	1	0	1	1	1	1	0	0
Bradyrhizobium sp. CCGE-LA001	Bacteria	Proteobacteria	Alphaproteobacteria	0	0	0	0	0	0	0	0	0	0	0	0	0	0	0	0	0	1	1	0	0	1	1	1	1	0	0	0	0	1	0	1	1	1	1	0	0
Brevundimonas sp. DS20	Bacteria	Proteobacteria	Alphaproteobacteria	0	0	0	0	0	0	0	0	0	0	0	0	0	0	0	0	0	1	1	0	0	1	1	1	0	0	0	0	0	1	0	1	1	1	1	0	0
Brevundimonas sp. GW460-12-10-14-LB2	Bacteria	Proteobacteria	Alphaproteobacteria	0	0	0	0	0	0	0	0	0	0	0	0	0	0	0	0	0	1	1	0	0	1	1	1	1	0	0	0	0	1	0	1	1	1	1	0	0
Brucella sp. 141012304 genome assembly	Bacteria	Proteobacteria	Alphaproteobacteria	0	0	0	0	0	0	0	0	0	0	0	0	0	0	0	0	0	0	1	0	0	1	1	1	0	0	0	0	0	1	0	1	1	1	1	0	0
Brucella sp. 2002734562 chromosome 1	Bacteria	Proteobacteria	Alphaproteobacteria	0	0	0	0	0	0	0	0	0	0	0	0	0	0	0	0	0	0	1	0	0	1	1	1	0	0	0	0	0	1	0	1	1	1	1	0	0
Bradyrhizobium sp. BTAi1	Bacteria	Proteobacteria	Alphaproteobacteria	0	0	0	0	0	0	0	0	1	0	0	0	0	0	0	0	0	1	1	0	0	1	1	1	1	0	0	0	0	1	0	1	1	1	1	0	0
Bradyrhizobium sp. S23321 DNA	Bacteria	Proteobacteria	Alphaproteobacteria	0	0	0	0	0	0	0	0	0	0	0	0	0	0	0	0	0	1	1	0	0	1	1	1	1	0	0	0	0	1	0	1	1	1	1	0	0
Bradyrhizobium sp. BF49 genome assembly	Bacteria	Proteobacteria	Alphaproteobacteria	0	0	0	0	0	0	0	0	0	0	0	0	0	0	0	0	0	1	1	0	0	1	1	1	1	0	0	0	0	1	0	1	1	1	1	0	0
Brucella suis 1330 chromosome I	Bacteria	Proteobacteria	Alphaproteobacteria	0	0	0	0	0	0	0	0	0	0	0	0	0	0	0	0	0	0	1	0	0	1	1	1	0	0	0	0	0	1	0	1	1	1	1	0	0
Brucella suis ATCC 23445 chromosome I	Bacteria	Proteobacteria	Alphaproteobacteria	0	0	0	0	0	0	0	0	0	0	0	0	0	0	0	0	0	0	1	0	0	1	1	1	0	0	0	0	0	1	0	1	1	1	1	0	0
Brucella suis 1330 chromosome I	Bacteria	Proteobacteria	Alphaproteobacteria	0	0	0	0	0	0	0	0	0	0	0	0	0	0	0	0	0	0	1	0	0	1	1	1	0	0	0	0	0	1	0	1	1	1	1	0	0
Brucella suis VBI22 chromosome I	Bacteria	Proteobacteria	Alphaproteobacteria	0	0	0	0	0	0	0	0	0	0	0	0	0	0	0	0	0	0	1	0	0	1	1	1	0	0	0	0	0	1	0	1	1	1	1	0	0
Brucella suis bv. 1 str. S2 chromosome I	Bacteria	Proteobacteria	Alphaproteobacteria	0	0	0	0	0	0	0	0	0	0	0	0	0	0	0	0	0	0	1	0	0	1	1	1	0	0	0	0	0	1	0	1	1	1	1	0	0
Brucella suis bv. 2 strain PT09143 chromosome I	Bacteria	Proteobacteria	Alphaproteobacteria	0	0	0	0	0	0	0	0	0	0	0	0	0	0	0	0	0	0	1	0	0	1	1	1	0	0	0	0	0	1	0	1	1	1	1	0	0
Brucella suis bv. 2 strain PT09172 chromosome I	Bacteria	Proteobacteria	Alphaproteobacteria	0	0	0	0	0	0	0	0	0	0	0	0	0	0	0	0	0	0	1	0	0	1	1	1	0	0	0	0	0	1	0	1	1	1	1	0	0
Brucella suis bv. 2 strain Bs364CITA chromosome I	Bacteria	Proteobacteria	Alphaproteobacteria	0	0	0	0	0	0	0	0	0	0	0	0	0	0	0	0	0	0	1	0	0	1	1	1	0	0	0	0	0	1	0	1	1	1	1	0	0
Brucella suis bv. 2 strain Bs396CITA chromosome I	Bacteria	Proteobacteria	Alphaproteobacteria	0	0	0	0	0	0	0	0	0	0	0	0	0	0	0	0	0	0	1	0	0	1	1	1	0	0	0	0	0	1	0	1	1	1	1	0	0
Brucella suis bv. 2 strain Bs143CITA chromosome I	Bacteria	Proteobacteria	Alphaproteobacteria	0	0	0	0	0	0	0	0	0	0	0	0	0	0	0	0	0	0	1	0	0	1	1	1	0	0	0	0	0	1	0	1	1	1	1	0	0
Brucella suis strain 513UK chromosome 1	Bacteria	Proteobacteria	Alphaproteobacteria	0	0	0	0	0	0	0	0	0	0	0	0	0	0	0	0	0	0	1	0	0	1	1	1	0	0	0	0	0	1	0	1	1	1	1	0	0
Brucella suis bv. 3 str. 686 chromosome 1	Bacteria	Proteobacteria	Alphaproteobacteria	0	0	0	0	0	0	0	0	0	0	0	0	0	0	0	0	0	0	1	0	0	1	1	1	0	0	0	0	0	1	0	1	1	1	1	0	0
Brucella suis strain BSP chromosome 1	Bacteria	Proteobacteria	Alphaproteobacteria	0	0	0	0	0	0	0	0	0	0	0	0	0	0	0	0	0	0	1	0	0	1	1	1	0	0	0	0	0	1	0	1	1	1	1	0	0
Brucella suis strain ZW046 chromosome 1	Bacteria	Proteobacteria	Alphaproteobacteria	0	0	0	0	0	0	0	0	0	0	0	0	0	0	0	0	0	0	1	0	0	1	1	1	0	0	0	0	0	1	0	1	1	1	1	0	0
Brucella suis strain ZW043 chromosome 1	Bacteria	Proteobacteria	Alphaproteobacteria	0	0	0	0	0	0	0	0	0	0	0	0	0	0	0	0	0	0	1	0	0	1	1	1	0	0	0	0	0	1	0	1	1	1	1	0	0
Brucella suis strain Human/AR/US/1981 chromosome I	Bacteria	Proteobacteria	Alphaproteobacteria	0	0	0	0	0	0	0	0	0	0	0	0	0	0	0	0	0	0	1	0	0	1	1	1	0	0	0	0	0	1	0	1	1	1	1	0	0
Brucella suis strain 2004000578 chromosome 1	Bacteria	Proteobacteria	Alphaproteobacteria	0	0	0	0	0	0	0	0	0	0	0	0	0	0	0	0	0	0	1	0	0	1	1	1	0	0	0	0	0	1	0	1	1	1	1	0	0
Brevundimonas subvibrioides ATCC 15264	Bacteria	Proteobacteria	Alphaproteobacteria	0	0	0	0	0	0	0	0	0	0	0	0	0	0	0	0	0	1	1	0	0	1	1	1	1	0	0	0	0	1	0	1	1	1	1	0	0
Brucella sp. F60 genome assembly BVF60	Bacteria	Proteobacteria	Alphaproteobacteria	0	0	0	0	0	0	0	0	0	0	0	0	0	0	0	0	0	0	1	0	0	1	1	1	0	0	0	0	0	1	0	1	1	1	1	0	0
Burkholderia ambifaria MC40-6 chromosome 1	Bacteria	Proteobacteria	Betaproteobacteria	0	0	0	0	0	0	0	0	0	0	0	0	0	0	0	0	0	1	1	0	0	1	1	1	1	1	0	0	0	1	0	1	1	1	0	0	1
Burkholderia ambifaria AMMD chromosome 1	Bacteria	Proteobacteria	Betaproteobacteria	0	0	0	0	0	0	0	0	0	0	0	0	0	0	0	0	0	1	1	0	0	1	1	1	1	1	0	0	0	1	0	1	1	1	0	0	1
Burkholderia ambifaria AMMD chromosome 1	Bacteria	Proteobacteria	Betaproteobacteria	0	0	0	0	0	0	0	0	0	0	0	0	0	0	0	0	0	1	1	0	0	1	1	1	1	1	0	0	0	1	0	1	1	1	0	0	1
Buchnera aphidicola str. Sg (Schizaphis graminum)	Bacteria	Proteobacteria	Gammaproteobacteria	0	0	0	0	0	0	0	0	0	0	0	0	0	0	0	0	0	0	0	0	0	1	0	0	0	0	1	0	0	0	0	0	0	0	0	0	1
Buchnera aphidicola str. Bp (Baizongia pistaciae)	Bacteria	Proteobacteria	Gammaproteobacteria	0	0	0	0	0	0	0	0	0	0	0	0	0	0	0	0	0	0	0	0	0	1	0	0	0	0	1	0	0	0	0	0	0	0	0	0	1
Buchnera aphidicola str. APS (Acyrthosiphon pisum) chromosome	Bacteria	Proteobacteria	Gammaproteobacteria	0	0	0	0	0	0	0	0	0	0	0	0	0	0	0	0	0	0	0	0	0	1	0	0	0	0	1	0	0	0	0	0	0	0	0	0	1
Buchnera aphidicola str. Tuc7 (Acyrthosiphon pisum)	Bacteria	Proteobacteria	Gammaproteobacteria	0	0	0	0	0	0	0	0	0	0	0	0	0	0	0	0	0	0	0	0	0	1	0	0	0	0	1	0	0	0	0	0	0	0	0	0	1
Buchnera aphidicola str. 5A (Acyrthosiphon pisum)	Bacteria	Proteobacteria	Gammaproteobacteria	0	0	0	0	0	0	0	0	0	0	0	0	0	0	0	0	0	0	0	0	0	1	0	0	0	0	1	0	0	0	0	0	0	0	0	0	1
Buchnera aphidicola BCc	Bacteria	Proteobacteria	Gammaproteobacteria	0	0	0	0	0	0	0	0	0	0	0	0	0	0	0	0	0	0	0	0	0	1	0	0	0	0	1	0	0	0	0	0	0	0	0	0	1
Buchnera aphidicola str. LL01 (Acyrthosiphon pisum)	Bacteria	Proteobacteria	Gammaproteobacteria	0	0	0	0	0	0	0	0	0	0	0	0	0	0	0	0	0	0	0	0	0	0	0	0	0	0	1	0	0	0	0	0	0	0	0	0	0
Buchnera aphidicola str. TLW03 (Acyrthosiphon pisum)	Bacteria	Proteobacteria	Gammaproteobacteria	0	0	0	0	0	0	0	0	0	0	0	0	0	0	0	0	0	0	0	0	0	0	0	0	0	0	0	0	0	0	0	0	0	0	0	0	0
Buchnera aphidicola str. JF99 (Acyrthosiphon pisum)	Bacteria	Proteobacteria	Gammaproteobacteria	0	0	0	0	0	0	0	0	0	0	0	0	0	0	0	0	0	0	0	0	0	1	0	0	0	0	1	0	0	0	0	0	0	0	0	0	1
Buchnera aphidicola str. JF98 (Acyrthosiphon pisum)	Bacteria	Proteobacteria	Gammaproteobacteria	0	0	0	0	0	0	0	0	0	0	0	0	0	0	0	0	0	0	0	0	0	0	0	0	0	0	0	0	0	0	0	0	0	0	0	0	0
Buchnera aphidicola (Cinara tujafilina)	Bacteria	Proteobacteria	Gammaproteobacteria	0	0	0	0	0	0	0	0	0	0	0	0	0	0	0	0	0	0	0	0	0	1	0	0	0	0	0	0	0	0	0	0	0	0	0	0	0
Buchnera aphidicola str. Ak (Acyrthosiphon kondoi)	Bacteria	Proteobacteria	Gammaproteobacteria	0	0	0	0	0	0	0	0	0	0	0	0	0	0	0	0	0	0	0	0	0	1	0	0	0	0	1	0	0	0	0	0	0	0	0	0	1
Buchnera aphidicola str. Ua (Uroleucon ambrosiae)	Bacteria	Proteobacteria	Gammaproteobacteria	0	0	0	0	0	0	0	0	0	0	0	0	0	0	0	0	0	0	0	0	0	1	0	0	0	0	0	0	0	0	0	0	0	0	0	0	1
Buchnera aphidicola str. USDA (Myzus persicae)	Bacteria	Proteobacteria	Gammaproteobacteria	0	0	0	0	0	0	0	0	0	0	0	0	0	0	0	0	0	0	0	0	0	1	0	0	0	0	1	0	0	0	0	0	0	0	0	0	1
Buchnera aphidicola str. W106 (Myzus persicae)	Bacteria	Proteobacteria	Gammaproteobacteria	0	0	0	0	0	0	0	0	0	0	0	0	0	0	0	0	0	0	0	0	0	1	0	0	0	0	1	0	0	0	0	0	0	0	0	0	1
Buchnera aphidicola str. G002 (Myzus persicae)	Bacteria	Proteobacteria	Gammaproteobacteria	0	0	0	0	0	0	0	0	0	0	0	0	0	0	0	0	0	0	0	0	0	1	0	0	0	0	1	0	0	0	0	0	0	0	0	0	1
Buchnera aphidicola str. F009 (Myzus persicae)	Bacteria	Proteobacteria	Gammaproteobacteria	0	0	0	0	0	0	0	0	0	0	0	0	0	0	0	0	0	0	0	0	0	1	0	0	0	0	1	0	0	0	0	0	0	0	0	0	1
Buchnera aphidicola (Aphis glycines) strain BAg	Bacteria	Proteobacteria	Gammaproteobacteria	0	0	0	0	0	0	0	0	0	0	0	0	0	0	0	0	0	0	0	0	0	1	0	0	0	0	1	0	0	0	0	0	0	0	0	0	1
Burkholderiales bacterium GJ-E10 DNA	Bacteria	Proteobacteria	Betaproteobacteria	0	0	0	0	0	0	0	0	1	0	0	0	0	0	0	0	0	0	1	0	0	1	1	1	1	1	0	0	0	1	0	1	1	1	0	0	0
Burkholderiales bacterium YL45	Bacteria	Proteobacteria	Betaproteobacteria	0	0	0	0	0	0	0	1	0	0	0	0	0	0	0	0	0	0	1	0	0	1	1	1	0	1	1	1	0	0	0	1	1	1	0	0	0
Burkholderia cepacia GG4 chromosome 1	Bacteria	Proteobacteria	Betaproteobacteria	0	0	0	0	0	0	0	0	0	0	0	0	0	0	0	0	0	0	1	0	0	1	1	1	1	1	0	0	0	1	0	1	1	1	0	0	1
Burkholderia cepacia JBK9 chromosome 1	Bacteria	Proteobacteria	Betaproteobacteria	0	0	0	0	0	0	0	0	0	0	0	0	0	0	0	0	0	0	1	0	0	1	1	1	1	1	0	0	0	1	0	1	1	1	0	0	1
Burkholderia cepacia strain DDS 7H-2 chromosome 1	Bacteria	Proteobacteria	Betaproteobacteria	0	0	0	0	0	0	0	0	0	0	0	0	0	0	0	0	0	1	1	0	0	1	1	1	1	1	0	0	0	1	0	1	1	1	0	0	1
Burkholderia cepacia strain LO6	Bacteria	Proteobacteria	Betaproteobacteria	0	0	0	0	0	0	0	0	0	0	0	0	0	0	0	0	0	1	1	0	0	1	1	1	1	1	0	0	0	1	0	1	1	1	0	0	1
Burkholderia cepacia ATCC 25416 chromosome 1	Bacteria	Proteobacteria	Betaproteobacteria	0	0	0	0	0	0	0	0	0	0	0	0	0	0	0	0	0	1	1	0	0	1	1	1	1	1	0	0	0	1	0	1	1	1	0	0	1
Burkholderia cepacia strain INT3-BP177 chromosome 1	Bacteria	Proteobacteria	Betaproteobacteria	0	0	0	0	0	0	0	0	0	0	0	0	0	0	0	0	0	0	1	0	0	1	1	1	1	1	0	0	0	1	0	1	1	1	0	0	1
Burkholderia cepacia strain MSMB1184WGS chromosome 1	Bacteria	Proteobacteria	Betaproteobacteria	0	0	0	0	0	0	0	0	0	0	0	0	0	0	0	0	0	0	1	0	0	1	1	1	1	1	0	0	0	1	0	1	1	1	0	0	1
Burkholderia cenocepacia J2315 chromosome 1	Bacteria	Proteobacteria	Betaproteobacteria	0	0	0	0	0	0	0	0	0	0	0	0	0	0	0	0	0	0	1	0	0	1	1	1	1	1	0	0	0	1	0	1	1	1	0	0	1
Burkholderia cenocepacia AU 1054 chromosome 1	Bacteria	Proteobacteria	Betaproteobacteria	0	0	0	0	0	0	0	0	0	0	0	0	0	0	0	0	0	1	1	0	0	1	1	1	1	1	0	0	0	1	0	1	1	1	0	0	0
Burkholderia cenocepacia MC0-3 chromosome 1	Bacteria	Proteobacteria	Betaproteobacteria	0	0	0	0	0	0	0	0	0	0	0	0	0	0	0	0	0	1	1	0	0	1	1	1	1	1	0	0	0	1	0	1	1	1	0	0	1
Burkholderia cenocepacia HI2424 chromosome 1	Bacteria	Proteobacteria	Betaproteobacteria	0	0	0	0	0	0	0	0	0	0	0	0	0	0	0	0	0	1	1	0	0	1	1	1	1	1	0	0	0	1	0	1	1	1	0	0	1
Burkholderia cenocepacia H111 chromosome 1 complete genome.	Bacteria	Proteobacteria	Betaproteobacteria	0	0	0	0	0	0	0	0	0	0	0	0	0	0	0	0	0	1	1	0	0	1	1	1	1	1	0	0	0	1	0	1	1	1	0	0	1
Burkholderia cenocepacia strain DDS 22E-1 chromosome 1	Bacteria	Proteobacteria	Betaproteobacteria	0	0	0	0	0	0	0	0	0	0	0	0	0	0	0	0	0	1	1	0	0	1	1	1	1	1	0	0	0	1	0	1	1	1	0	0	1
Burkholderia cenocepacia strain DWS 37E-2 chromosome 1	Bacteria	Proteobacteria	Betaproteobacteria	0	0	0	0	0	0	0	0	0	0	0	0	0	0	0	0	0	1	1	0	0	1	1	1	1	1	0	0	0	1	0	1	1	1	0	0	1
Burkholderia cenocepacia strain ST32 chromosome 1	Bacteria	Proteobacteria	Betaproteobacteria	0	0	0	0	0	0	0	0	0	0	0	0	0	0	0	0	0	1	1	0	0	1	1	1	1	1	0	0	0	1	0	1	1	1	0	0	1
Burkholderia cenocepacia strain 842 chromosome 1	Bacteria	Proteobacteria	Betaproteobacteria	0	0	0	0	0	0	0	0	0	0	0	0	0	0	0	0	0	1	1	0	0	1	1	1	1	1	0	0	0	1	0	1	1	1	0	0	1
Burkholderia cenocepacia strain 895 chromosome 1	Bacteria	Proteobacteria	Betaproteobacteria	0	0	0	0	0	0	0	0	0	0	0	0	0	0	0	0	0	1	1	0	0	1	1	1	1	1	0	0	0	1	0	1	1	1	0	0	1
Burkholderia cenocepacia strain FL-5-3-30-S1-D7 chromosome 1	Bacteria	Proteobacteria	Betaproteobacteria	0	0	0	0	0	0	0	0	0	0	0	0	0	0	0	0	0	0	1	0	0	1	1	1	1	1	0	0	0	1	0	1	1	1	0	0	1
Burkholderia cenocepacia strain MSMB384WGS chromosome 1	Bacteria	Proteobacteria	Betaproteobacteria	0	0	0	0	0	0	0	0	0	0	0	0	0	0	0	0	0	1	1	0	0	1	1	1	1	1	0	0	0	1	0	1	1	1	0	0	1
Burkholderia contaminans strain MS14 chromosome 1	Bacteria	Proteobacteria	Betaproteobacteria	0	0	0	0	0	0	0	0	0	0	0	0	0	0	0	0	0	1	1	0	0	1	1	1	1	1	0	0	0	1	0	1	1	1	0	0	1
Burkholderia diffusa strain RF2-non-BP9 chromosome 1	Bacteria	Proteobacteria	Betaproteobacteria	0	0	0	0	0	0	0	0	0	0	0	0	0	0	0	0	0	1	1	0	0	1	1	1	1	1	0	0	0	1	0	1	1	1	0	0	1
Burkholderia dolosa AU0158 chromosome 1	Bacteria	Proteobacteria	Betaproteobacteria	0	0	0	0	0	0	0	0	0	0	0	0	0	0	0	0	0	1	1	0	0	1	1	1	1	1	0	0	0	1	0	1	1	1	0	0	1
Burkholderia gladioli BSR3 chromosome 1	Bacteria	Proteobacteria	Betaproteobacteria	0	0	0	0	0	0	0	0	0	0	0	0	0	0	0	0	0	1	1	0	0	1	1	1	1	1	0	0	0	1	0	1	1	1	0	0	1
Burkholderia gladioli strain ATCC 10248 chromosome 1	Bacteria	Proteobacteria	Betaproteobacteria	0	0	0	0	0	0	0	0	0	0	0	0	0	0	0	0	0	1	1	0	0	1	1	1	1	1	0	0	0	1	0	1	1	1	0	0	1
Burkholderia glumae BGR1 chromosome 1	Bacteria	Proteobacteria	Betaproteobacteria	0	0	0	0	0	0	0	0	0	0	0	0	0	0	0	0	0	1	1	0	0	1	1	1	1	1	0	0	0	1	0	1	1	1	0	0	0
Burkholderia glumae PG1 chromosome 1	Bacteria	Proteobacteria	Betaproteobacteria	0	0	0	0	0	1	0	0	0	0	0	0	0	0	0	0	0	1	1	0	0	1	1	1	1	1	0	0	0	1	0	1	1	1	0	0	1
Burkholderia glumae LMG 2196 = ATCC 33617 chromosome I	Bacteria	Proteobacteria	Betaproteobacteria	0	0	0	0	0	0	0	0	0	0	0	0	0	0	0	0	0	1	1	0	0	1	1	1	1	1	0	0	0	1	0	1	1	1	0	0	1
Butyrivibrio hungatei strain MB2003 chromosome I	Bacteria	Firmicutes	Clostridia	0	0	0	0	0	0	0	0	0	0	0	0	0	0	0	1	0	0	1	1	0	1	1	1	0	1	0	0	0	1	1	1	0	1	1	0	0
Burkholderia sp. 383 chromosome 1	Bacteria	Proteobacteria	Betaproteobacteria	0	0	0	0	0	0	0	0	0	0	0	0	0	0	0	0	0	0	1	0	0	1	1	1	1	1	0	0	0	1	0	1	1	1	0	0	1
Burkholderia lata strain FL-7-5-30-S1-D0 chromosome 1	Bacteria	Proteobacteria	Betaproteobacteria	0	0	0	0	0	0	0	0	0	0	0	0	0	0	0	0	0	1	1	0	0	1	1	1	1	1	0	0	0	1	0	1	1	1	0	0	1
Burkholderia latens strain AU17928 chromosome 1	Bacteria	Proteobacteria	Betaproteobacteria	0	0	0	0	0	0	0	0	0	0	0	0	0	0	0	0	0	1	1	0	0	1	1	1	1	1	0	0	0	1	0	1	1	1	0	0	1
Burkholderia mallei ATCC 23344 chromosome 1	Bacteria	Proteobacteria	Betaproteobacteria	0	0	0	0	0	0	0	0	0	0	0	0	0	0	0	0	0	0	1	0	0	1	1	1	1	1	0	0	0	1	0	1	1	1	0	0	1
Burkholderia mallei SAVP1 chromosome I	Bacteria	Proteobacteria	Betaproteobacteria	0	0	0	0	0	0	0	0	0	0	0	0	0	0	0	0	0	0	1	0	0	1	1	1	1	1	0	0	0	1	0	1	1	1	0	0	1
Burkholderia mallei NCTC 10229 chromosome I	Bacteria	Proteobacteria	Betaproteobacteria	0	0	0	0	0	0	0	0	0	0	0	0	0	0	0	0	0	0	1	0	0	1	1	1	1	1	0	0	0	1	0	1	1	1	0	0	1
Burkholderia mallei NCTC 10247 chromosome I	Bacteria	Proteobacteria	Betaproteobacteria	0	0	0	0	0	0	0	0	0	0	0	0	0	0	0	0	0	0	1	0	0	1	1	1	1	1	0	0	0	1	0	1	1	1	0	0	1
Burkholderia mallei strain FMH 23344 chromosome 1	Bacteria	Proteobacteria	Betaproteobacteria	0	0	0	0	0	0	0	0	0	0	0	0	0	0	0	0	0	0	1	0	0	1	1	1	1	1	0	0	0	1	0	1	1	1	0	0	1
Burkholderia mallei strain 6 chromosome 1	Bacteria	Proteobacteria	Betaproteobacteria	0	0	0	0	0	0	0	0	0	0	0	0	0	0	0	0	0	0	1	0	0	1	1	1	1	1	0	0	0	1	0	1	1	1	0	0	0
Burkholderia mallei strain 23344 chromosome 1	Bacteria	Proteobacteria	Betaproteobacteria	0	0	0	0	0	0	0	0	0	0	0	0	0	0	0	0	0	0	1	0	0	1	1	1	1	1	0	0	0	1	0	1	1	1	0	0	1
Burkholderia mallei strain BMQ chromosome 1	Bacteria	Proteobacteria	Betaproteobacteria	0	0	0	0	0	0	0	0	0	0	0	0	0	0	0	0	0	0	1	0	0	1	1	1	1	1	0	0	0	1	0	1	1	1	0	0	1
Burkholderia mallei strain 2000031063 chromosome 1	Bacteria	Proteobacteria	Betaproteobacteria	0	0	0	0	0	0	0	0	0	0	0	0	0	0	0	0	0	0	1	0	0	1	1	1	1	1	0	0	0	1	0	1	1	1	0	0	1
Burkholderia mallei NCTC 10247 chromosome 1	Bacteria	Proteobacteria	Betaproteobacteria	0	0	0	0	0	0	0	0	0	0	0	0	0	0	0	0	0	0	1	0	0	1	1	1	1	1	0	0	0	1	0	1	1	1	0	0	1
Burkholderia mallei strain 2002734299 chromosome 1	Bacteria	Proteobacteria	Betaproteobacteria	0	0	0	0	0	0	0	0	0	0	0	0	0	0	0	0	0	0	1	0	0	1	1	1	1	1	0	0	0	1	0	1	1	1	0	0	1
Burkholderia mallei strain 11 chromosome I	Bacteria	Proteobacteria	Betaproteobacteria	0	0	0	0	0	0	0	0	0	0	0	0	0	0	0	0	0	0	1	0	0	1	1	1	1	1	0	0	0	1	0	1	1	1	0	0	1
Burkholderia mallei strain India86-567-2 chromosome I	Bacteria	Proteobacteria	Betaproteobacteria	0	0	0	0	0	0	0	0	0	0	0	0	0	0	0	0	0	0	1	0	0	1	1	1	1	1	0	0	0	1	0	1	1	1	0	0	1
Burkholderia mallei strain 2002734306 chromosome I	Bacteria	Proteobacteria	Betaproteobacteria	0	0	0	0	0	0	0	0	0	0	0	0	0	0	0	0	0	0	1	0	0	1	1	1	1	1	0	0	0	1	0	1	1	1	0	0	1
Burkholderia mallei strain 2002721276 chromosome 1	Bacteria	Proteobacteria	Betaproteobacteria	0	0	0	0	0	0	0	0	0	0	0	0	0	0	0	0	0	0	1	0	0	1	1	1	1	1	0	0	0	1	0	1	1	1	0	0	1
Burkholderia mallei strain Bahrain1 chromosome 1	Bacteria	Proteobacteria	Betaproteobacteria	0	0	0	0	0	0	0	0	0	0	0	0	0	0	0	0	0	0	1	0	0	1	1	1	1	1	0	0	0	1	0	1	1	1	0	0	1
Burkholderia metallica strain FL-6-5-30-S1-D7 chromosome 1	Bacteria	Proteobacteria	Betaproteobacteria	0	0	0	0	0	0	0	0	0	0	0	0	0	0	0	0	0	1	1	0	0	1	1	1	1	1	0	0	0	1	0	1	1	1	0	0	1
Burkholderia multivorans ATCC 17616 DNA	Bacteria	Proteobacteria	Betaproteobacteria	0	0	0	0	0	0	0	0	0	0	0	0	0	0	0	0	0	1	1	0	0	1	1	1	1	1	0	0	0	1	0	1	1	1	0	0	1
Burkholderia multivorans ATCC 17616 chromosome 1	Bacteria	Proteobacteria	Betaproteobacteria	0	0	0	0	0	0	0	0	0	0	0	0	0	0	0	0	0	1	1	0	0	1	1	1	1	1	0	0	0	1	0	1	1	1	0	0	1
Burkholderia multivorans strain DDS 15A-1 chromosome 1	Bacteria	Proteobacteria	Betaproteobacteria	0	0	0	0	0	0	0	0	0	0	0	0	0	0	0	0	0	1	1	0	0	1	1	1	1	1	0	0	0	1	0	1	1	1	0	0	1
Burkholderia multivorans ATCC BAA-247 chromosome 1	Bacteria	Proteobacteria	Betaproteobacteria	0	0	0	0	0	0	0	0	0	0	0	0	0	0	0	0	0	1	1	0	0	1	1	1	1	1	0	0	0	1	0	1	1	1	0	0	1
Burkholderia multivorans strain AU1185 chromosome 1	Bacteria	Proteobacteria	Betaproteobacteria	0	0	0	0	0	0	0	0	0	0	0	0	0	0	0	0	0	1	1	0	0	1	1	1	1	1	0	0	0	1	0	1	1	1	0	0	1
Burkholderia multivorans strain MSMB1640WGS chromosome 1	Bacteria	Proteobacteria	Betaproteobacteria	0	0	0	0	0	0	0	0	0	0	0	0	0	0	0	0	0	1	1	0	0	1	1	1	1	1	0	0	0	1	0	1	1	1	0	0	1
Burkholderia oklahomensis strain EO147 chromosome 1	Bacteria	Proteobacteria	Betaproteobacteria	0	0	0	0	0	0	0	0	0	0	0	0	0	0	0	0	0	0	1	0	0	1	1	1	1	1	0	1	0	1	0	1	1	1	0	0	1
Burkholderia oklahomensis C6786 chromosome I	Bacteria	Proteobacteria	Betaproteobacteria	0	0	0	0	0	0	0	0	0	0	0	0	0	0	0	0	0	0	1	0	0	1	1	1	1	1	0	1	0	1	0	1	1	1	0	0	1
Burkholderia plantarii strain ATCC 43733 chromosome 1	Bacteria	Proteobacteria	Betaproteobacteria	0	0	0	0	0	1	0	0	0	0	0	0	0	0	0	0	0	1	1	0	0	1	1	1	1	1	0	0	0	1	0	1	1	1	0	0	1
Butyrivibrio proteoclasticus B316 chromosome 1	Bacteria	Firmicutes	Clostridia	0	0	0	0	0	0	0	0	0	0	0	0	0	0	0	1	0	0	1	1	0	1	1	1	0	1	0	0	0	1	1	1	0	1	1	0	0
Burkholderia pseudomultivorans strain SUB-INT23-BP2 chromosome 1	Bacteria	Proteobacteria	Betaproteobacteria	0	0	0	0	0	0	0	0	0	0	0	0	0	0	0	0	0	1	1	0	0	1	1	1	1	1	0	0	0	1	0	1	1	1	0	0	1
Burkholderia pseudomallei K96243 chromosome 1	Bacteria	Proteobacteria	Betaproteobacteria	0	0	0	0	0	0	0	0	0	0	0	0	0	0	0	0	0	1	1	0	0	1	1	1	1	1	0	0	0	1	0	1	1	1	0	0	1
Burkholderia pseudomallei 1710b chromosome I	Bacteria	Proteobacteria	Betaproteobacteria	0	0	0	0	0	0	0	0	0	0	0	0	0	0	0	0	0	1	1	0	0	1	1	1	1	1	0	0	0	1	0	1	1	1	0	0	1
Burkholderia pseudomallei 668 chromosome I	Bacteria	Proteobacteria	Betaproteobacteria	0	0	0	0	0	0	0	0	0	0	0	0	0	0	0	0	0	1	1	0	0	1	1	1	1	1	0	0	0	1	0	1	1	1	0	0	1
Burkholderia pseudomallei 1106a chromosome I	Bacteria	Proteobacteria	Betaproteobacteria	0	0	0	0	0	0	0	0	0	0	0	0	0	0	0	0	0	1	1	0	0	1	1	1	1	1	0	0	0	1	0	1	1	1	0	0	1
Burkholderia pseudomallei 1026b chromosome 1	Bacteria	Proteobacteria	Betaproteobacteria	0	0	0	0	0	0	0	0	0	0	0	0	0	0	0	0	0	1	1	0	0	1	1	1	1	1	0	0	0	1	0	1	1	1	0	0	1
Burkholderia pseudomallei BPC006 chromosome I	Bacteria	Proteobacteria	Betaproteobacteria	0	0	0	0	0	0	0	0	0	0	0	0	0	0	0	0	0	1	1	0	0	1	1	1	1	1	0	0	0	1	0	1	1	1	0	0	1
Burkholderia pseudomallei MSHR305 chromosome 1	Bacteria	Proteobacteria	Betaproteobacteria	0	0	0	0	0	0	0	0	0	0	0	0	0	0	0	0	0	1	1	0	0	1	1	1	1	1	0	0	0	1	0	1	1	1	0	0	1
Burkholderia pseudomallei NCTC 13179 chromosome 1	Bacteria	Proteobacteria	Betaproteobacteria	0	0	0	0	0	0	0	0	0	0	0	0	0	0	0	0	0	1	1	0	0	1	1	1	1	1	0	0	0	1	0	1	1	1	0	0	1
Burkholderia pseudomallei NCTC 13178 chromosome 1	Bacteria	Proteobacteria	Betaproteobacteria	0	0	0	0	0	0	0	0	0	0	0	0	0	0	0	0	0	1	1	0	0	1	1	1	1	1	0	0	0	1	0	1	1	1	0	0	1
Burkholderia pseudomallei NAU20B-16 chromosome 1	Bacteria	Proteobacteria	Betaproteobacteria	0	0	0	0	0	0	0	0	0	0	0	0	0	0	0	0	0	1	1	0	0	1	1	1	1	1	0	0	0	1	0	1	1	1	0	0	1
Burkholderia pseudomallei MSHR511 chromosome 1	Bacteria	Proteobacteria	Betaproteobacteria	0	0	0	0	0	0	0	0	0	0	0	0	0	0	0	0	0	1	1	0	0	1	1	1	1	1	0	0	0	1	0	1	1	1	0	0	1
Burkholderia pseudomallei MSHR146 chromosome 1	Bacteria	Proteobacteria	Betaproteobacteria	0	0	0	0	0	0	0	0	0	0	0	0	0	0	0	0	0	1	1	0	0	1	1	1	1	1	0	0	0	1	0	1	1	1	0	0	1
Burkholderia pseudomallei MSHR520 chromosome 1	Bacteria	Proteobacteria	Betaproteobacteria	0	0	0	0	0	0	0	0	0	0	0	0	0	0	0	0	0	1	1	0	0	1	1	1	1	1	0	0	0	1	0	1	1	1	0	0	1
Burkholderia pseudomallei strain BDP chromosome 1	Bacteria	Proteobacteria	Betaproteobacteria	0	0	0	0	0	0	0	0	0	0	0	0	0	0	0	0	0	1	1	0	0	1	1	1	1	1	0	0	0	1	0	1	1	1	0	0	1
Burkholderia pseudomallei strain BSR chromosome 1	Bacteria	Proteobacteria	Betaproteobacteria	0	0	0	0	0	0	0	0	0	0	0	0	0	0	0	0	0	1	1	0	0	1	1	1	1	1	0	0	0	1	0	1	1	1	0	0	1
Burkholderia pseudomallei HBPUB10303a chromosome 1	Bacteria	Proteobacteria	Betaproteobacteria	0	0	0	0	0	0	0	0	0	0	0	0	0	0	0	0	0	1	1	0	0	1	1	1	1	1	0	0	0	1	0	1	1	1	0	0	1
Burkholderia pseudomallei HBPUB10134a chromosome 1	Bacteria	Proteobacteria	Betaproteobacteria	0	0	0	0	0	0	0	0	0	0	0	0	0	0	0	0	0	1	1	0	0	1	1	1	1	1	0	0	0	1	0	1	1	1	0	0	1
Burkholderia pseudomallei MSHR5858 chromosome 1	Bacteria	Proteobacteria	Betaproteobacteria	0	0	0	0	0	0	0	0	0	0	0	0	0	0	0	0	0	1	1	0	0	1	1	1	1	1	0	0	0	1	0	1	1	1	0	0	1
Burkholderia pseudomallei MSHR5848 chromosome 1	Bacteria	Proteobacteria	Betaproteobacteria	0	0	0	0	0	0	0	0	0	0	0	0	0	0	0	0	0	1	1	0	0	1	1	1	1	1	0	0	0	1	0	1	1	1	0	0	1
Burkholderia pseudomallei MSHR5855 chromosome 1	Bacteria	Proteobacteria	Betaproteobacteria	0	0	0	0	0	0	0	0	0	0	0	0	0	0	0	0	0	1	1	0	0	1	1	1	1	1	0	0	0	1	0	1	1	1	0	0	1
Burkholderia pseudomallei strain BGR chromosome 1	Bacteria	Proteobacteria	Betaproteobacteria	0	0	0	0	0	0	0	0	0	0	0	0	0	0	0	0	0	1	1	0	0	1	1	1	1	1	0	0	0	1	0	1	1	1	0	0	1
Burkholderia pseudomallei strain Mahidol-1106a chromosome 1	Bacteria	Proteobacteria	Betaproteobacteria	0	0	0	0	0	0	0	0	0	0	0	0	0	0	0	0	0	1	1	0	0	1	1	1	1	1	0	0	0	1	0	1	1	1	0	0	1
Burkholderia pseudomallei strain 1106a chromosome 1	Bacteria	Proteobacteria	Betaproteobacteria	0	0	0	0	0	0	0	0	0	0	0	0	0	0	0	0	0	1	1	0	0	1	1	1	1	1	0	0	0	1	0	1	1	1	0	0	1
Burkholderia pseudomallei strain MSHR1655 chromosome 1	Bacteria	Proteobacteria	Betaproteobacteria	0	0	0	0	0	0	0	0	0	0	0	0	0	0	0	0	0	1	1	0	0	1	1	1	1	1	0	0	0	1	0	1	1	1	0	0	1
Burkholderia pseudomallei 576 chromosome 1	Bacteria	Proteobacteria	Betaproteobacteria	0	0	0	0	0	0	0	0	0	0	0	0	0	0	0	0	0	1	1	0	0	1	1	1	1	1	0	0	0	1	0	1	1	1	0	0	1
Burkholderia pseudomallei strain PHLS 112 chromosome I	Bacteria	Proteobacteria	Betaproteobacteria	0	0	0	0	0	0	0	0	0	0	0	0	0	0	0	0	0	1	1	0	0	1	1	1	1	1	0	0	0	1	0	1	1	1	0	0	1
Burkholderia pseudomallei Pasteur 52237 chromosome 1	Bacteria	Proteobacteria	Betaproteobacteria	0	0	0	0	0	0	0	0	0	0	0	0	0	0	0	0	0	1	1	0	0	1	1	1	1	1	0	0	0	1	0	1	1	1	0	0	1
Burkholderia pseudomallei NAU35A-3 chromosome 1	Bacteria	Proteobacteria	Betaproteobacteria	0	0	0	0	0	0	0	0	0	0	0	0	0	0	0	0	0	1	1	0	0	1	1	1	1	1	0	0	0	1	0	1	1	1	0	0	0
Burkholderia pseudomallei MSHR62 chromosome 1	Bacteria	Proteobacteria	Betaproteobacteria	0	0	0	0	0	0	0	0	0	0	0	0	0	0	0	0	0	1	1	0	0	1	1	1	1	1	0	0	0	1	0	1	1	1	0	0	1
Burkholderia pseudomallei B03 chromosome 1	Bacteria	Proteobacteria	Betaproteobacteria	0	0	0	0	0	0	0	0	0	0	0	0	0	0	0	0	0	1	1	0	0	1	1	1	1	1	0	0	0	1	0	1	1	1	0	0	1
Burkholderia pseudomallei TSV 48 chromosome 1	Bacteria	Proteobacteria	Betaproteobacteria	0	0	0	0	0	0	0	0	0	0	0	0	0	0	0	0	0	0	1	0	0	1	1	1	1	1	0	0	0	1	0	1	1	1	0	0	1
Burkholderia pseudomallei K42 chromosome 1	Bacteria	Proteobacteria	Betaproteobacteria	0	0	0	0	0	0	0	0	0	0	0	0	0	0	0	0	0	1	1	0	0	1	1	1	1	1	0	0	0	1	0	1	1	1	0	0	1
Burkholderia pseudomallei A79A chromosome 1	Bacteria	Proteobacteria	Betaproteobacteria	0	0	0	0	0	0	0	0	0	0	0	0	0	0	0	0	0	1	1	0	0	1	1	1	1	1	0	0	0	1	0	1	1	1	0	0	1
Burkholderia sp. TSV202 chromosome 1	Bacteria	Proteobacteria	Betaproteobacteria	0	0	0	0	0	0	0	0	0	0	0	0	0	0	0	0	0	1	1	0	0	1	1	1	1	1	0	0	0	1	0	1	1	1	0	0	1
Burkholderia pseudomallei genome assembly BP_3921g	Bacteria	Proteobacteria	Betaproteobacteria	0	0	0	0	0	0	0	0	0	0	0	0	0	0	0	0	0	1	1	0	0	1	1	1	1	1	0	0	0	1	0	1	1	1	0	0	1
Burkholderia pseudomallei strain vgh07 chromosome 1	Bacteria	Proteobacteria	Betaproteobacteria	0	0	0	0	0	0	0	0	0	0	0	0	0	0	0	0	0	1	1	0	0	1	1	1	1	1	0	0	0	1	0	1	1	1	0	0	1
Burkholderia pseudomallei 1026b chromosome 1	Bacteria	Proteobacteria	Betaproteobacteria	0	0	0	0	0	0	0	0	0	0	0	0	0	0	0	0	0	1	1	0	0	1	1	1	1	1	0	0	0	1	0	1	1	1	0	0	1
Burkholderia pseudomallei 406e chromosome 1	Bacteria	Proteobacteria	Betaproteobacteria	0	0	0	0	0	0	0	0	0	0	0	0	0	0	0	0	0	1	1	0	0	1	1	1	1	1	0	0	0	1	0	1	1	1	0	0	1
Burkholderia pseudomallei MSHR840 chromosome I	Bacteria	Proteobacteria	Betaproteobacteria	0	0	0	0	0	0	0	0	0	0	0	0	0	0	0	0	0	1	1	0	0	1	1	1	1	1	0	0	0	1	0	1	1	1	0	0	1
Burkholderia pseudomallei MSHR491 chromosome I	Bacteria	Proteobacteria	Betaproteobacteria	0	0	0	0	0	0	0	0	0	0	0	0	0	0	0	0	0	1	1	0	0	1	1	1	1	1	0	0	0	1	0	1	1	1	0	0	1
Burkholderia pseudomallei MSHR2543 chromosome I	Bacteria	Proteobacteria	Betaproteobacteria	0	0	0	0	0	0	0	0	0	0	0	0	0	0	0	0	0	1	1	0	0	1	1	1	1	1	0	0	0	1	0	1	1	1	0	0	0
Burkholderia pseudomallei 7894 chromosome I	Bacteria	Proteobacteria	Betaproteobacteria	0	0	0	0	0	0	0	0	0	0	0	0	0	0	0	0	0	1	1	0	0	1	1	1	1	1	0	0	0	1	0	1	1	1	0	0	1
Burkholderia pseudomallei K96243 chromosome I	Bacteria	Proteobacteria	Betaproteobacteria	0	0	0	0	0	0	0	0	0	0	0	0	0	0	0	0	0	1	1	0	0	1	1	1	1	1	0	0	0	1	0	1	1	1	0	0	1
Burkholderia pseudomallei strain MSHR668 chromosome I	Bacteria	Proteobacteria	Betaproteobacteria	0	0	0	0	0	0	0	0	0	0	0	0	0	0	0	0	0	1	1	0	0	1	1	1	1	1	0	0	0	1	0	1	1	1	0	0	1
Burkholderia pseudomallei PB08298010 chromosome I	Bacteria	Proteobacteria	Betaproteobacteria	0	0	0	0	0	0	0	0	0	0	0	0	0	0	0	0	0	1	1	0	0	1	1	1	1	1	0	0	0	1	0	1	1	1	0	0	1
Burkholderia pseudomallei strain vgh16W chromosome 1	Bacteria	Proteobacteria	Betaproteobacteria	0	0	0	0	0	0	0	0	0	0	0	0	0	0	0	0	0	1	1	0	0	1	1	1	1	1	0	0	0	1	0	1	1	1	0	0	1
Burkholderia pseudomallei strain Bp1651 chromosome 1	Bacteria	Proteobacteria	Betaproteobacteria	0	0	0	0	0	0	0	0	0	0	0	0	0	0	0	0	0	1	1	0	0	1	1	1	1	1	0	0	0	1	0	1	1	1	0	0	1
Burkholderia pseudomallei strain M1 chromosome 1	Bacteria	Proteobacteria	Betaproteobacteria	0	0	0	0	0	0	0	0	0	0	0	0	0	0	0	0	0	1	1	0	0	1	1	1	1	1	0	0	0	1	0	1	1	1	0	0	1
Burkholderia pseudomallei strain MS chromosome 1	Bacteria	Proteobacteria	Betaproteobacteria	0	0	0	0	0	0	0	0	0	0	0	0	0	0	0	0	0	1	1	0	0	1	1	1	1	1	0	0	0	1	0	1	1	1	0	0	1
Burkholderia pyrrocinia strain DSM 10685 chromosome 1	Bacteria	Proteobacteria	Betaproteobacteria	0	0	0	0	0	0	0	0	0	0	0	0	0	0	0	0	0	0	1	0	0	1	1	1	1	1	0	0	0	1	0	1	1	1	0	0	1
Burkholderia sp. YI23 chromosome 1	Bacteria	Proteobacteria	Betaproteobacteria	0	0	0	0	1	0	0	0	0	0	0	0	0	0	0	0	0	1	1	0	0	1	1	1	1	1	0	0	0	1	0	1	1	1	0	0	1
Burkholderia sp. 2002721687 chromosome I	Bacteria	Proteobacteria	Betaproteobacteria	0	0	0	0	0	0	0	0	0	0	0	0	0	0	0	0	0	0	1	0	0	1	1	1	1	1	0	0	0	1	0	1	1	1	0	0	1
Burkholderia sp. HB1 chromosome 1	Bacteria	Proteobacteria	Betaproteobacteria	0	0	0	0	0	0	0	0	0	0	0	0	0	0	0	0	0	1	1	0	0	1	1	1	1	1	0	0	0	1	0	1	1	1	0	0	1
Burkholderia sp. Bp5365 strain MSMB43 chromosome 1	Bacteria	Proteobacteria	Betaproteobacteria	0	0	0	0	0	0	0	0	0	0	0	0	0	0	0	0	0	0	1	0	0	1	1	1	1	1	0	0	0	1	0	1	1	1	0	0	1
Burkholderia sp. Bp7605 strain MSMB0175 chromosome 1	Bacteria	Proteobacteria	Betaproteobacteria	0	0	0	0	0	0	0	0	0	0	0	0	0	0	0	0	0	0	1	0	0	1	1	1	1	1	0	0	0	1	0	1	1	1	0	0	1
Burkholderia sp. PAMC 26561 chromosome 1	Bacteria	Proteobacteria	Betaproteobacteria	0	0	1	0	0	0	0	0	0	0	0	0	0	0	0	0	0	1	1	0	0	1	1	1	1	1	0	1	0	1	0	1	1	1	0	0	1
Burkholderia sp. PAMC 28687 strain PAMC28687 chromosome 1	Bacteria	Proteobacteria	Betaproteobacteria	0	0	0	0	0	1	0	0	0	0	0	0	0	0	0	0	0	1	1	0	0	1	1	1	1	1	0	0	0	1	0	1	1	1	0	0	1
Burkholderia sp. OLGA172 chromosome 1	Bacteria	Proteobacteria	Betaproteobacteria	0	0	0	0	0	0	0	0	0	0	0	0	0	0	0	0	0	1	1	0	0	1	1	1	1	1	0	0	0	1	0	1	1	1	0	0	1
Burkholderia sp. KJ006 chromosome 1	Bacteria	Proteobacteria	Betaproteobacteria	0	0	0	0	0	0	0	0	0	0	0	0	0	0	0	0	0	1	1	0	0	1	1	1	1	1	0	0	0	1	0	1	1	1	0	0	1
Burkholderia sp. CCGE1001 chromosome 1	Bacteria	Proteobacteria	Betaproteobacteria	0	0	0	0	0	0	0	0	0	0	0	0	0	0	0	0	0	1	1	0	0	1	1	1	1	1	0	0	0	1	0	1	1	1	0	0	1
Burkholderia sp. CCGE1002 chromosome 1	Bacteria	Proteobacteria	Betaproteobacteria	0	0	0	0	0	0	0	0	0	0	0	0	0	0	0	0	0	1	1	0	0	1	1	1	1	1	0	0	0	1	0	1	1	1	0	0	1
Burkholderia sp. CCGE1003 chromosome 1	Bacteria	Proteobacteria	Betaproteobacteria	0	0	0	0	0	0	0	0	0	0	0	0	0	0	0	0	0	1	1	0	0	1	1	1	1	1	0	0	0	1	0	1	1	1	0	0	1
Burkholderia sp. RPE64 DNA	Bacteria	Proteobacteria	Betaproteobacteria	0	0	0	0	0	0	0	0	0	0	0	0	0	0	0	0	0	1	1	0	0	1	1	1	1	1	0	0	0	1	0	1	1	1	0	0	1
Burkholderia sp. RPE67 DNA	Bacteria	Proteobacteria	Betaproteobacteria	0	0	0	0	1	0	0	0	0	0	0	0	0	0	0	0	0	1	1	0	0	1	1	1	1	1	0	0	0	1	0	1	1	1	0	0	1
Burkholderia stagnalis strain MSMB735WGS chromosome 1	Bacteria	Proteobacteria	Betaproteobacteria	0	0	0	0	0	0	0	0	0	0	0	0	0	0	0	0	0	1	1	0	0	1	1	1	1	1	0	0	0	1	0	1	1	1	0	0	1
Burkholderia stabilis strain ATCC BAA-67 chromosome 1	Bacteria	Proteobacteria	Betaproteobacteria	0	0	0	0	0	0	0	0	0	0	0	0	0	0	0	0	0	0	1	0	0	1	1	1	1	1	0	0	0	1	0	1	1	1	0	0	1
Burkholderia territorii strain RF8-non-BP5 chromosome 1	Bacteria	Proteobacteria	Betaproteobacteria	0	0	0	0	0	0	0	0	0	0	0	0	0	0	0	0	0	1	1	0	0	1	1	1	1	1	0	0	0	1	0	1	1	1	0	0	1
Burkholderia thailandensis E264 chromosome I	Bacteria	Proteobacteria	Betaproteobacteria	0	0	0	0	0	0	0	0	0	0	0	0	0	0	0	0	0	0	1	0	0	1	1	1	1	1	0	0	0	1	0	1	1	1	0	0	1
Burkholderia thailandensis MSMB121 chromosome 1	Bacteria	Proteobacteria	Betaproteobacteria	0	0	0	0	0	0	0	0	0	0	0	0	0	0	0	0	0	0	1	0	0	1	1	1	1	1	0	0	0	1	0	1	1	1	0	0	1
Burkholderia thailandensis H0587 chromosome 1	Bacteria	Proteobacteria	Betaproteobacteria	0	0	0	0	0	0	0	0	0	0	0	0	0	0	0	0	0	0	1	0	0	1	1	1	1	1	0	0	0	1	0	1	1	1	0	0	1
Burkholderia thailandensis 2002721723 chromosome 1	Bacteria	Proteobacteria	Betaproteobacteria	0	0	0	0	0	0	0	0	0	0	0	0	0	0	0	0	0	0	1	0	0	1	1	1	1	1	0	0	0	1	0	1	1	1	0	0	1
Burkholderia thailandensis E444 chromosome 1	Bacteria	Proteobacteria	Betaproteobacteria	0	0	0	0	0	0	0	0	0	0	0	0	0	0	0	0	0	0	1	0	0	1	1	1	1	1	0	0	0	1	0	1	1	1	0	0	1
Burkholderia thailandensis USAMRU Malaysia #20 chromosome 1	Bacteria	Proteobacteria	Betaproteobacteria	0	0	0	0	0	0	0	0	0	0	0	0	0	0	0	0	0	0	1	0	0	1	1	1	1	1	0	0	0	1	0	1	1	1	0	0	0
Burkholderia thailandensis MSMB59 chromosome 1	Bacteria	Proteobacteria	Betaproteobacteria	0	0	0	0	0	0	0	0	0	0	0	0	0	0	0	0	0	0	1	0	0	1	1	1	1	1	0	0	0	1	0	1	1	1	0	0	1
Burkholderia thailandensis E254 chromosome 1	Bacteria	Proteobacteria	Betaproteobacteria	0	0	0	0	0	0	0	0	0	0	0	0	0	0	0	0	0	0	1	0	0	1	1	1	1	1	0	0	0	1	0	1	1	1	0	0	1
Burkholderia thailandensis strain 2003015869 chromosome 1	Bacteria	Proteobacteria	Betaproteobacteria	0	0	0	0	0	0	0	0	0	0	0	0	0	0	0	0	0	0	1	0	0	1	1	1	1	1	0	0	0	1	0	1	1	1	0	0	1
Burkholderia thailandensis 2002721643 chromosome I	Bacteria	Proteobacteria	Betaproteobacteria	0	0	0	0	0	0	0	0	0	0	0	0	0	0	0	0	0	0	1	0	0	1	1	1	1	1	0	0	0	1	0	1	1	1	0	0	1
Burkholderia thailandensis 34 chromosome 1	Bacteria	Proteobacteria	Betaproteobacteria	0	0	0	0	0	0	0	0	0	0	0	0	0	0	0	0	0	0	1	0	0	1	1	1	1	1	0	0	0	1	0	1	1	1	0	0	1
Burkholderia thailandensis strain 2003015869 chromosome 1	Bacteria	Proteobacteria	Betaproteobacteria	0	0	0	0	0	0	0	0	0	0	0	0	0	0	0	0	0	0	1	0	0	1	1	1	1	1	0	0	0	1	0	1	1	1	0	0	1
Burkholderia thailandensis strain MSMB59 chromosome 1	Bacteria	Proteobacteria	Betaproteobacteria	0	0	0	0	0	0	0	0	0	0	0	0	0	0	0	0	0	0	1	0	0	1	1	1	1	1	0	0	0	1	0	1	1	1	0	0	1
Burkholderia thailandensis strain 2002721121 chromosome 1	Bacteria	Proteobacteria	Betaproteobacteria	0	0	0	0	0	0	0	0	0	0	0	0	0	0	0	0	0	0	1	0	0	1	1	1	1	0	0	0	0	1	0	1	1	1	0	0	1
Burkholderia thailandensis strain 2002721643 chromosome 1	Bacteria	Proteobacteria	Betaproteobacteria	0	0	0	0	0	0	0	0	0	0	0	0	0	0	0	0	0	0	1	0	0	1	1	1	1	1	0	0	0	1	0	1	1	1	0	0	1
Burkholderia ubonensis MSMB22 chromosome I	Bacteria	Proteobacteria	Betaproteobacteria	0	0	0	0	0	0	0	0	0	0	0	0	0	0	0	0	0	0	1	0	0	1	1	1	1	1	0	0	0	1	0	1	1	1	0	0	1
Burkholderia ubonensis strain RF23-BP41 chromosome 1	Bacteria	Proteobacteria	Betaproteobacteria	0	0	0	0	0	0	0	0	0	0	0	0	0	0	0	0	0	1	1	0	0	1	1	1	1	1	0	0	0	1	0	1	1	1	0	0	1
Burkholderia ubonensis strain MSMB2035 chromosome 1	Bacteria	Proteobacteria	Betaproteobacteria	0	0	0	0	0	0	0	0	0	0	0	0	0	0	0	0	0	1	1	0	0	1	1	1	1	1	0	0	0	1	0	1	1	1	0	0	1
Burkholderia ubonensis strain MSMB0783 chromosome 1	Bacteria	Proteobacteria	Betaproteobacteria	0	0	0	0	0	0	0	0	0	0	0	0	0	0	0	0	0	1	0	0	0	1	1	1	1	1	0	0	0	1	0	1	1	1	0	0	0
Burkholderia ubonensis strain MSMB1189WGS chromosome 1	Bacteria	Proteobacteria	Betaproteobacteria	0	0	0	0	0	0	0	0	0	0	0	0	0	0	0	0	0	0	1	0	0	1	1	1	1	1	0	0	0	1	0	1	1	1	0	0	1
Burkholderia ubonensis strain MSMB1471WGS chromosome 1	Bacteria	Proteobacteria	Betaproteobacteria	0	0	0	0	0	0	0	0	0	0	0	0	0	0	0	0	0	1	1	0	0	1	1	1	1	1	0	0	0	1	0	1	1	1	0	0	1
Burkholderia vietnamiensis G4 chromosome 1	Bacteria	Proteobacteria	Betaproteobacteria	0	0	0	0	0	0	0	0	0	0	0	0	0	0	0	0	0	1	1	0	0	1	1	1	1	1	0	0	0	1	0	1	1	1	0	0	1
Burkholderia vietnamiensis strain FL-2-3-30-S1-D0 chromosome 1	Bacteria	Proteobacteria	Betaproteobacteria	0	0	0	0	0	0	0	0	0	0	0	0	0	0	0	0	0	1	1	0	0	1	1	1	1	1	0	0	0	1	0	1	1	1	0	0	1
Burkholderia vietnamiensis strain AU1233 chromosome 1	Bacteria	Proteobacteria	Betaproteobacteria	0	0	0	0	0	0	0	0	0	0	0	0	0	0	0	0	0	1	1	0	0	1	1	1	1	1	0	0	0	1	0	1	1	1	0	0	1
Burkholderia vietnamiensis strain HI2297 chromosome 1	Bacteria	Proteobacteria	Betaproteobacteria	0	0	0	0	0	0	0	0	0	0	0	0	0	0	0	0	0	1	1	0	0	1	1	1	1	1	0	0	0	1	0	1	1	1	0	0	1
Burkholderia vietnamiensis strain MSMB608WGS chromosome 1	Bacteria	Proteobacteria	Betaproteobacteria	0	0	0	0	0	0	0	0	0	0	0	0	0	0	0	0	0	1	1	0	0	1	1	1	1	1	0	0	0	1	0	1	1	1	0	0	1
Catenulispora acidiphila DSM 44928	Bacteria	Actinobacteria	Catenulisporales	0	0	0	0	1	0	0	0	0	0	0	0	0	0	0	0	0	1	1	1	0	1	0	1	0	1	0	0	0	0	0	1	1	1	0	1	0
Candidatus Accumulibacter phosphatis clade IIA str. UW-1	Bacteria	Proteobacteria	Betaproteobacteria	0	0	0	0	1	0	0	0	0	0	1	0	0	0	0	0	0	0	1	0	0	1	1	1	1	1	0	0	1	1	0	1	1	1	0	0	1
Caldilinea aerophila DSM 14535 = NBRC 104270 DNA	Bacteria	Chloroflexi	Caldilineae	0	1	0	0	0	0	0	0	0	1	1	0	0	0	0	0	0	0	1	1	0	1	1	1	1	1	0	0	0	1	0	1	1	1	0	0	0
Candidatus Amoebophilus asiaticus 5a2	Bacteria	Bacteroidetes	Cytophagia	0	0	0	0	0	0	0	0	0	0	0	0	0	0	0	0	0	0	1	1	0	1	1	1	1	1	0	0	0	0	0	0	1	1	1	0	0
Candidatus Arthromitus sp. SFB-rat-Yit DNA	Bacteria	Firmicutes	Clostridia	0	0	1	0	0	0	0	0	0	0	0	0	0	0	0	0	0	0	1	1	0	1	1	1	0	1	0	0	0	1	0	1	0	1	1	0	0
Candidatus Arthromitus sp. SFB-mouse-NL	Bacteria	Firmicutes	Clostridia	0	0	1	0	0	0	0	0	0	0	0	0	0	0	0	0	0	0	1	1	0	1	1	1	0	1	0	0	0	1	0	1	0	1	1	0	0
Candidatus Arthromitus sp. SFB-mouse-Japan DNA	Bacteria	Firmicutes	Clostridia	0	0	1	0	0	0	0	0	0	0	0	0	0	0	0	0	0	0	1	1	0	1	1	1	0	1	0	0	0	1	0	1	0	1	1	0	0
Candidatus Arthromitus sp. SFB-mouse-Yit DNA	Bacteria	Firmicutes	Clostridia	0	0	1	0	0	0	0	0	0	0	0	0	0	0	0	0	0	0	1	1	0	1	1	1	0	1	0	0	0	1	0	1	0	1	1	0	0
Candidatus Atelocyanobacterium thalassa isolate ALOHA	Bacteria	Cyanobacteria	Oscillatoriophycideae	0	0	0	0	0	0	0	0	0	0	0	0	0	0	0	0	0	0	1	1	0	1	1	1	0	0	0	1	0	1	0	1	1	1	0	0	0
Candidatus Azobacteroides pseudotrichonymphae genomovar. CFP2 DNA	Bacteria	Bacteroidetes	Bacteroidia	0	0	0	0	0	0	0	0	0	0	0	0	0	0	0	0	0	0	1	1	0	1	0	1	1	1	0	0	0	0	0	0	1	1	1	0	0
Caulobacteraceae bacterium OTSz_A_272	Bacteria	Proteobacteria	Alphaproteobacteria	0	0	0	0	0	0	0	0	0	0	0	0	0	0	0	0	0	1	1	0	0	1	1	1	1	0	0	0	0	1	0	0	1	1	1	0	0
Candidatus Baumannia cicadellinicola strain BGSS	Bacteria	Proteobacteria	Gammaproteobacteria	0	0	0	0	0	0	0	0	0	0	0	0	0	0	0	0	0	0	1	0	0	1	1	0	0	0	0	0	0	0	0	0	1	1	0	0	1
Candidatus Baumannia cicadellinicola strain B-GSS	Bacteria	Proteobacteria	Gammaproteobacteria	0	0	0	0	0	0	0	0	0	0	0	0	0	0	0	0	0	0	0	0	0	1	1	0	0	0	0	0	0	0	0	0	1	1	0	0	1
Candidatus Babela massiliensis strain BABL1 complete genome.	Bacteria	Proteobacteria	Deltaproteobacteria	0	0	0	0	0	0	0	0	0	0	0	0	0	0	0	0	0	0	1	0	0	0	1	1	0	0	0	1	0	0	0	0	1	1	0	0	0
Caldicellulosiruptor bescii DSM 6725	Bacteria	Firmicutes	Clostridia	0	1	0	0	0	0	0	0	0	1	0	0	1	0	0	0	0	0	1	1	0	1	1	1	0	1	0	0	0	1	0	1	1	1	0	0	0
Candidatus Blochmannia pennsylvanicus str. BPEN	Bacteria	Proteobacteria	Gammaproteobacteria	0	0	0	0	0	0	0	0	0	0	0	0	0	0	0	0	0	0	0	0	0	0	0	0	0	0	1	0	0	0	0	0	0	0	0	0	1
Blochmannia floridanus complete genome.	Bacteria	Proteobacteria	Gammaproteobacteria	0	0	0	0	0	0	0	0	0	0	0	0	0	0	0	0	0	0	0	0	0	0	0	0	0	0	1	0	0	0	0	0	0	0	0	0	1
Candidatus Blochmannia vafer str. BVAF	Bacteria	Proteobacteria	Gammaproteobacteria	0	0	0	0	0	0	0	0	0	0	0	0	0	0	0	0	0	0	0	0	0	0	0	0	0	0	1	0	0	0	0	0	0	0	0	0	1
Candidatus Blochmannia chromaiodes str. 640	Bacteria	Proteobacteria	Gammaproteobacteria	0	0	0	0	0	0	0	0	0	0	0	0	0	0	0	0	0	0	0	0	0	0	0	0	0	0	1	0	0	0	0	0	0	0	0	0	1
Candidatus Carsonella ruddii HT isolate Thao2000	Bacteria	Proteobacteria	Gammaproteobacteria	0	0	0	0	0	0	0	0	0	0	0	0	0	0	0	0	0	0	1	0	0	0	0	0	0	0	0	0	0	0	0	0	0	0	0	0	0
Capnocytophaga canimorsus Cc5	Bacteria	Bacteroidetes	Flavobacteriia	0	0	0	0	0	0	0	0	1	0	0	0	0	0	0	0	1	0	1	1	0	1	1	1	1	1	0	1	0	0	0	1	1	1	1	0	0
Candidatus Cloacamonas acidaminovorans str. Evry provisional genome sequence from WWE1 candidate division.	Bacteria	Cloacimonetes	Candidatus_Cloacimonas	0	1	0	0	0	0	0	0	0	1	0	0	0	0	0	0	0	0	1	1	0	1	1	1	0	1	0	0	0	1	0	1	1	1	0	0	0
Campylobacter coli 15-537360	Bacteria	Proteobacteria	Epsilonproteobacteria	0	0	0	0	0	0	0	0	0	0	0	0	0	0	0	0	0	0	1	0	0	1	1	1	0	0	0	0	0	0	0	1	1	1	1	0	0
Campylobacter coli RM1875	Bacteria	Proteobacteria	Epsilonproteobacteria	0	0	0	0	0	0	0	0	0	0	0	0	0	0	0	0	0	0	1	0	0	1	1	1	0	0	0	0	0	0	0	1	0	1	1	0	0
Campylobacter coli RM4661	Bacteria	Proteobacteria	Epsilonproteobacteria	0	0	0	0	0	0	0	0	1	0	0	0	0	0	0	0	0	0	1	0	0	1	1	1	0	0	0	0	0	0	0	0	1	1	1	0	0
Campylobacter coli RM5611	Bacteria	Proteobacteria	Epsilonproteobacteria	0	0	0	0	0	0	0	0	0	0	0	0	0	0	0	0	0	0	1	0	0	1	1	1	0	0	0	0	0	0	0	1	1	1	1	0	0
Campylobacter coli strain FB1	Bacteria	Proteobacteria	Epsilonproteobacteria	0	0	0	0	0	0	0	0	0	0	0	0	0	0	0	0	0	0	1	0	0	1	1	1	0	0	0	0	0	0	0	1	1	1	1	0	0
Campylobacter coli strain BFR-CA-9557 genome.	Bacteria	Proteobacteria	Epsilonproteobacteria	0	0	0	0	0	0	0	0	0	0	0	0	0	0	0	0	0	0	1	0	0	0	1	1	0	0	0	0	0	0	0	1	1	1	0	0	0
Campylobacter coli strain HC2-48	Bacteria	Proteobacteria	Epsilonproteobacteria	0	0	0	0	0	0	0	0	0	0	0	0	0	0	0	0	0	0	1	0	0	1	1	1	0	0	0	0	0	0	0	1	1	1	1	0	0
Campylobacter coli strain OR12	Bacteria	Proteobacteria	Epsilonproteobacteria	0	0	0	0	0	0	0	0	1	0	0	0	0	0	0	0	0	0	1	0	0	1	1	1	0	0	0	0	0	0	0	1	1	1	1	0	0
Campylobacter coli strain YH501	Bacteria	Proteobacteria	Epsilonproteobacteria	0	0	0	0	0	0	0	0	0	0	0	0	0	0	0	0	0	0	1	0	0	1	1	1	0	0	0	0	0	0	0	1	1	1	1	0	0
Campylobacter coli strain 14983A	Bacteria	Proteobacteria	Epsilonproteobacteria	0	0	0	0	0	0	0	0	1	0	0	0	0	0	0	0	0	0	1	0	0	1	1	1	0	0	0	0	0	0	0	1	1	1	1	0	0
Campylobacter coli strain YF2105	Bacteria	Proteobacteria	Epsilonproteobacteria	0	0	0	0	0	0	0	0	0	0	0	0	0	0	0	0	0	0	1	0	0	1	1	1	0	0	0	0	0	0	0	1	1	1	1	0	0
Campylobacter coli strain MG1116	Bacteria	Proteobacteria	Epsilonproteobacteria	0	0	0	0	0	0	0	0	0	0	0	0	0	0	0	0	0	0	1	0	0	1	1	1	0	0	0	0	0	0	0	1	1	1	1	0	0
Campylobacter coli strain BP3183	Bacteria	Proteobacteria	Epsilonproteobacteria	0	0	0	0	0	0	0	0	1	0	0	0	0	0	0	0	0	0	1	0	0	1	0	1	0	0	0	0	0	0	0	1	1	1	1	0	0
Campylobacter coli strain WA333	Bacteria	Proteobacteria	Epsilonproteobacteria	0	0	0	0	0	0	0	0	0	0	0	0	0	0	0	0	0	0	1	0	0	1	1	1	0	0	0	0	0	0	0	1	1	1	1	0	0
Campylobacter coli strain ZV1224	Bacteria	Proteobacteria	Epsilonproteobacteria	0	0	0	0	0	0	0	0	1	0	0	0	0	0	0	0	0	0	1	0	0	1	1	1	0	0	0	0	0	0	0	1	1	1	1	0	0
Campylobacter coli strain BG2108	Bacteria	Proteobacteria	Epsilonproteobacteria	0	0	0	0	0	0	0	0	0	0	0	0	0	0	0	0	0	0	1	0	0	1	1	1	0	0	0	0	0	0	0	1	1	1	1	0	0
Campylobacter concisus 13826	Bacteria	Proteobacteria	Epsilonproteobacteria	0	1	0	0	0	0	0	0	0	0	0	0	0	0	0	0	0	0	1	0	0	1	1	1	0	0	0	0	0	0	0	0	1	1	1	0	0
Campylobacter concisus strain ATCC 33237	Bacteria	Proteobacteria	Epsilonproteobacteria	0	0	0	0	0	0	0	0	0	0	0	0	0	0	0	0	0	0	1	0	0	1	1	1	0	0	0	0	0	0	0	0	1	1	1	0	0
Caulobacter crescentus CB15 chromosome	Bacteria	Proteobacteria	Alphaproteobacteria	0	0	0	0	0	0	0	0	0	0	0	0	0	0	0	0	0	0	1	0	0	1	1	1	1	0	0	0	0	1	0	1	1	1	1	0	0
Caulobacter crescentus NA1000	Bacteria	Proteobacteria	Alphaproteobacteria	0	0	0	0	0	0	0	0	0	0	0	0	0	0	0	0	0	0	1	0	0	1	1	1	1	0	0	0	0	1	0	1	1	1	1	0	0
Campylobacter curvus 525.92	Bacteria	Proteobacteria	Epsilonproteobacteria	0	1	0	0	0	0	0	0	0	0	0	0	0	0	0	0	0	0	1	0	0	1	1	1	0	0	0	0	0	0	0	1	1	1	1	0	0
Candidatus Desulforudis audaxviator MP104C	Bacteria	Firmicutes	Clostridia	0	1	0	0	0	0	0	0	0	0	1	0	1	0	0	0	0	1	1	1	0	1	1	1	0	0	0	0	0	1	0	1	1	1	1	0	0
Enterobacteriaceae bacterium symbiont of Maconellicoccus hirsutus isolate DEMHIR genome assembly	Bacteria	Proteobacteria	Gammaproteobacteria	0	0	0	0	0	0	0	0	0	0	0	0	0	0	0	0	0	0	1	0	0	1	1	0	0	0	0	0	0	1	0	0	1	1	0	0	1
Candidatus Endolissoclinum faulkneri L2	Bacteria	Proteobacteria	Alphaproteobacteria	0	0	0	0	0	0	0	0	0	0	0	0	0	0	0	0	0	0	0	0	0	1	1	0	0	0	0	0	0	0	0	0	0	0	1	0	0
Candidatus Endolissoclinum faulkneri L5	Bacteria	Proteobacteria	Alphaproteobacteria	0	0	0	0	0	0	0	0	0	0	0	0	0	0	0	0	0	0	0	0	0	1	1	0	0	0	0	0	0	0	0	0	0	0	1	0	0
Cardinium endosymbiont cEper1 of Encarsia pergandiella complete genome.	Bacteria	Bacteroidetes	Cytophagia	0	0	0	0	0	0	0	0	0	0	0	0	0	0	0	0	0	0	1	0	0	1	1	0	1	0	0	0	0	0	0	0	1	1	1	0	0
Candidatus Evansia muelleri genome assembly CEM1.1	Bacteria	Proteobacteria	Gammaproteobacteria	0	0	0	0	0	0	0	0	0	0	0	0	0	0	0	0	0	0	1	0	0	1	0	0	0	0	0	0	0	0	0	0	1	0	0	0	1
Caldisericum exile AZM16c01 DNA	Bacteria	Caldiserica	Caldisericia	0	1	0	0	0	0	0	0	0	0	0	0	0	0	0	0	0	0	1	1	0	1	0	1	0	1	0	0	0	1	0	1	1	1	0	0	0
Campylobacter fetus subsp. fetus 82-40	Bacteria	Proteobacteria	Epsilonproteobacteria	0	1	0	0	0	0	0	0	0	0	0	0	1	0	0	0	0	0	1	0	0	1	1	1	0	0	0	0	0	0	0	0	1	1	1	0	0
Campylobacter fetus subsp. testudinum 03-427	Bacteria	Proteobacteria	Epsilonproteobacteria	0	1	0	0	0	0	0	0	0	0	0	0	1	0	0	0	0	0	1	0	0	1	1	1	0	0	0	0	0	0	0	1	1	1	1	0	0
Campylobacter fetus subsp. venerealis cfvi03/293	Bacteria	Proteobacteria	Epsilonproteobacteria	0	0	0	0	0	0	0	0	0	0	0	0	1	0	0	0	0	0	1	0	0	1	1	1	0	0	0	0	0	0	0	0	1	1	1	0	0
Campylobacter fetus subsp. fetus 04/554	Bacteria	Proteobacteria	Epsilonproteobacteria	0	0	0	0	0	0	0	0	0	0	0	0	1	0	0	0	0	0	1	0	0	1	1	1	0	0	0	0	0	0	0	1	1	1	1	0	0
Campylobacter fetus subsp. venerealis 97/608	Bacteria	Proteobacteria	Epsilonproteobacteria	0	0	0	0	0	0	0	0	0	0	0	0	1	0	0	0	0	0	1	0	0	1	1	1	0	0	0	0	0	0	0	0	1	1	1	0	0
Campylobacter fetus subsp. testudinum strain pet-3	Bacteria	Proteobacteria	Epsilonproteobacteria	0	1	0	0	0	0	0	0	0	0	0	0	1	0	0	0	0	0	1	0	0	1	1	1	0	0	0	0	0	0	0	1	1	1	1	0	0
Campylobacter fetus subsp. venerealis str. 84-112	Bacteria	Proteobacteria	Epsilonproteobacteria	0	0	0	0	0	0	0	0	0	0	0	0	1	0	0	0	0	0	1	0	0	1	1	1	0	0	0	0	0	0	0	0	1	1	1	0	0
Campylobacter fetus subsp. testudinum Sp3	Bacteria	Proteobacteria	Epsilonproteobacteria	0	1	0	0	0	0	0	0	0	0	0	0	1	0	0	0	0	0	1	0	0	1	1	1	0	0	0	0	0	0	0	1	1	1	1	0	0
Campylobacter fetus subsp. venerealis strain 01/165	Bacteria	Proteobacteria	Epsilonproteobacteria	0	0	0	0	0	0	0	0	0	0	0	0	0	0	0	0	0	0	1	0	0	1	1	1	0	0	0	0	0	0	0	0	1	1	1	0	0
Filomicrobium sp. Y genome assembly Y1	Bacteria	Proteobacteria	Alphaproteobacteria	0	0	0	0	1	0	0	0	0	0	0	0	0	0	0	0	0	1	1	0	0	1	1	1	1	0	0	0	0	1	0	0	1	1	1	0	0
Filomicrobium sp. W genome assembly W1	Bacteria	Proteobacteria	Alphaproteobacteria	0	0	0	0	1	0	0	0	0	0	0	0	0	0	0	0	0	1	1	0	0	1	1	1	1	0	0	0	0	1	0	0	1	1	1	0	0
Campylobacter gracilis strain ATCC 33236	Bacteria	Proteobacteria	Epsilonproteobacteria	0	1	0	0	0	0	0	0	0	1	0	0	0	0	0	0	0	0	1	0	0	1	1	1	0	0	0	0	0	0	0	0	1	1	0	0	0
Enterobacteriaceae bacterium symbiont of Ferrisia virgata isolate GEFVIR genome assembly	Bacteria	Proteobacteria	Gammaproteobacteria	0	0	0	0	0	0	0	0	0	0	0	0	0	0	0	0	0	0	1	1	0	1	1	1	0	1	0	0	0	0	0	0	1	1	0	0	0
Capnocytophaga haemolytica strain CCUG 32990	Bacteria	Bacteroidetes	Flavobacteriia	0	0	0	0	0	0	0	0	0	0	0	0	0	0	0	0	0	0	1	1	0	1	1	1	1	1	0	0	0	0	0	1	1	1	0	0	0
Caulobacter henricii strain CB4	Bacteria	Proteobacteria	Alphaproteobacteria	0	0	0	0	0	0	0	0	0	0	0	0	0	0	0	0	0	0	1	0	0	1	1	1	1	0	0	0	0	1	0	1	1	1	1	0	0
Enterobacteriaceae bacterium symbiont of Trionymus perrisii isolate HETPER genome assembly	Bacteria	Proteobacteria	Gammaproteobacteria	0	0	0	0	0	0	0	0	0	0	0	0	0	0	0	0	0	0	1	0	0	1	1	0	0	0	0	0	0	0	0	0	1	1	0	0	0
Campylobacter hominis ATCC BAA-381	Bacteria	Proteobacteria	Epsilonproteobacteria	0	1	0	0	0	0	0	0	0	0	0	0	0	0	0	0	0	0	1	0	0	1	1	1	0	0	0	0	0	0	0	0	1	1	1	0	0
Carboxydothermus hydrogenoformans Z-2901	Bacteria	Firmicutes	Clostridia	0	1	0	0	0	0	0	0	0	1	0	0	0	0	0	0	0	1	1	1	0	1	1	1	0	1	0	0	0	1	1	1	1	1	1	0	0
Campylobacter hyointestinalis subsp. hyointestinalis LMG 9260	Bacteria	Proteobacteria	Epsilonproteobacteria	0	1	0	0	0	0	0	0	0	0	0	0	0	0	0	0	0	0	1	0	0	1	1	1	0	0	0	0	0	0	0	1	1	1	1	0	0
Campylobacter hyointestinalis subsp. lawsonii strain LMG 15993	Bacteria	Proteobacteria	Epsilonproteobacteria	0	0	0	0	0	0	0	0	0	0	0	0	0	0	0	0	0	0	1	0	0	1	1	1	0	0	0	0	0	1	0	1	1	1	1	0	0
Caldicellulosiruptor hydrothermalis 108	Bacteria	Firmicutes	Clostridia	0	1	0	0	0	0	0	0	0	1	0	1	0	0	0	0	0	0	1	1	0	1	1	1	0	1	0	0	0	1	0	1	1	1	0	0	0
Campylobacter iguaniorum strain 1485E	Bacteria	Proteobacteria	Epsilonproteobacteria	0	1	0	0	0	0	0	0	0	0	0	0	0	0	0	0	0	0	1	0	0	1	1	1	0	0	0	0	0	0	0	1	1	1	1	0	0
Campylobacter iguaniorum strain RM11343	Bacteria	Proteobacteria	Epsilonproteobacteria	0	0	0	0	0	0	0	0	0	0	0	0	0	0	0	0	0	0	1	0	0	1	1	1	0	0	0	0	0	0	0	1	1	1	1	0	0
Carnobacterium sp. WN1359	Bacteria	Firmicutes	Lactobacillales	0	0	0	0	0	0	0	0	0	0	0	0	0	0	0	0	0	0	1	1	0	1	1	1	1	1	0	0	1	1	1	1	0	1	1	0	0
Campylobacter insulaenigrae NCTC 12927	Bacteria	Proteobacteria	Epsilonproteobacteria	0	0	0	0	0	0	0	0	0	0	0	0	0	0	0	0	0	0	1	0	0	1	1	1	0	0	0	0	0	0	0	0	1	1	1	0	0
Candidatus Ishikawaella capsulata Mpkobe DNA	Bacteria	Proteobacteria	Gammaproteobacteria	0	0	0	0	0	0	0	0	0	0	0	0	0	0	0	0	0	0	1	0	0	1	0	0	0	0	1	0	0	0	0	0	1	1	0	0	1
Mollicutes bacterium HR1	Bacteria	Tenericutes	Candidatus_Izimaplasma	0	0	0	0	0	0	0	0	0	0	0	0	0	0	0	0	0	0	1	1	0	1	1	1	0	1	0	0	0	0	1	1	0	1	0	0	0
Campylobacter jejuni subsp. jejuni NCTC 11168 = ATCC 700819 chromosome	Bacteria	Proteobacteria	Epsilonproteobacteria	0	0	0	0	0	0	0	0	1	0	0	0	0	0	0	0	0	0	1	0	0	1	1	1	0	0	0	0	0	0	0	1	1	1	1	0	0
Campylobacter jejuni RM1221	Bacteria	Proteobacteria	Epsilonproteobacteria	0	0	0	0	0	0	0	0	0	0	0	0	0	0	0	0	0	0	1	0	0	1	1	1	0	0	0	0	0	0	0	1	1	1	1	0	0
Campylobacter jejuni subsp. jejuni 81-176	Bacteria	Proteobacteria	Epsilonproteobacteria	0	0	0	0	0	0	0	0	0	0	0	0	0	0	0	0	0	0	1	0	0	1	1	1	0	0	0	0	0	0	0	1	1	1	1	0	0
Campylobacter jejuni subsp. doylei 269.97	Bacteria	Proteobacteria	Epsilonproteobacteria	0	0	0	0	0	0	0	0	1	0	0	0	0	0	0	0	0	0	1	0	0	1	1	1	0	0	0	0	0	0	0	1	1	1	1	0	0
Campylobacter jejuni subsp. jejuni 81116	Bacteria	Proteobacteria	Epsilonproteobacteria	0	0	0	0	0	0	0	0	1	0	0	0	0	0	0	0	0	0	1	0	0	1	1	1	0	0	0	0	0	0	0	1	1	1	1	0	0
Campylobacter jejuni subsp. jejuni IA3902	Bacteria	Proteobacteria	Epsilonproteobacteria	0	0	0	0	0	0	0	0	1	0	0	0	0	0	0	0	0	0	1	0	0	1	1	1	0	0	0	0	0	0	0	1	1	1	1	0	0
Campylobacter jejuni subsp. jejuni M1	Bacteria	Proteobacteria	Epsilonproteobacteria	0	0	0	0	0	0	0	0	0	0	0	0	0	0	0	0	0	0	1	0	0	1	1	1	0	0	0	0	0	0	0	1	1	1	1	0	0
Campylobacter jejuni subsp. jejuni CG8421	Bacteria	Proteobacteria	Epsilonproteobacteria	0	0	0	0	0	0	0	0	1	0	0	0	0	0	0	0	0	0	1	0	0	1	1	1	0	0	0	0	0	0	0	1	1	1	1	0	0
Campylobacter jejuni subsp. jejuni S3	Bacteria	Proteobacteria	Epsilonproteobacteria	0	0	0	0	0	0	0	0	0	0	0	0	0	0	0	0	0	0	1	0	0	1	1	1	0	0	0	0	0	0	0	1	1	1	1	0	0
Campylobacter jejuni subsp. jejuni PT14	Bacteria	Proteobacteria	Epsilonproteobacteria	0	0	0	0	0	0	0	0	1	0	0	0	0	0	0	0	0	0	1	0	0	1	1	1	0	0	0	0	0	0	0	1	1	1	1	0	0
Campylobacter jejuni subsp. jejuni NCTC 11168-BN148 complete genome.	Bacteria	Proteobacteria	Epsilonproteobacteria	0	0	0	0	0	0	0	0	1	0	0	0	0	0	0	0	0	0	1	0	0	1	1	1	0	0	0	0	0	0	0	1	1	1	1	0	0
Campylobacter jejuni 32488	Bacteria	Proteobacteria	Epsilonproteobacteria	0	0	0	0	0	0	0	0	1	0	0	0	0	0	0	0	0	0	1	0	0	1	1	1	0	0	0	0	0	0	0	1	1	1	0	0	0
Campylobacter jejuni subsp. jejuni 00-2538	Bacteria	Proteobacteria	Epsilonproteobacteria	0	0	0	0	0	0	0	0	1	0	0	0	0	0	0	0	0	0	1	0	0	1	1	1	0	0	0	0	0	0	0	1	1	1	1	0	0
Campylobacter jejuni subsp. jejuni 00-2544	Bacteria	Proteobacteria	Epsilonproteobacteria	0	0	0	0	0	0	0	0	1	0	0	0	0	0	0	0	0	0	1	0	0	1	1	1	0	0	0	0	0	0	0	1	1	1	1	0	0
Campylobacter jejuni subsp. jejuni 00-2426	Bacteria	Proteobacteria	Epsilonproteobacteria	0	0	0	0	0	0	0	0	1	0	0	0	0	0	0	0	0	0	1	0	0	1	1	1	0	0	0	0	0	0	0	1	1	1	1	0	0
Campylobacter jejuni subsp. jejuni 00-2425	Bacteria	Proteobacteria	Epsilonproteobacteria	0	0	0	0	0	0	0	0	1	0	0	0	0	0	0	0	0	0	1	0	0	1	1	1	0	0	0	0	0	0	0	1	1	1	1	0	0
Campylobacter jejuni 4031 genome sequence.	Bacteria	Proteobacteria	Epsilonproteobacteria	0	0	0	0	0	0	0	0	1	0	0	0	0	0	0	0	0	0	1	0	0	1	1	1	0	0	0	0	0	0	0	1	1	1	1	0	0
Campylobacter jejuni subsp. jejuni R14	Bacteria	Proteobacteria	Epsilonproteobacteria	0	0	0	0	0	0	0	0	0	0	0	0	0	0	0	0	0	0	1	0	0	1	1	1	0	0	0	0	0	0	0	1	1	1	1	0	0
Campylobacter jejuni subsp. jejuni strain MTVDSCj20	Bacteria	Proteobacteria	Epsilonproteobacteria	0	0	0	0	0	0	0	0	1	0	0	0	0	0	0	0	0	0	1	0	0	1	1	1	0	0	0	0	0	0	0	1	1	1	1	0	0
Campylobacter jejuni subsp. jejuni F38011	Bacteria	Proteobacteria	Epsilonproteobacteria	0	0	0	0	0	0	0	0	1	0	0	0	0	0	0	0	0	0	1	0	0	1	1	1	0	0	0	0	0	0	0	1	1	1	1	0	0
Campylobacter jejuni subsp. jejuni strain YH001	Bacteria	Proteobacteria	Epsilonproteobacteria	0	0	0	0	0	0	0	0	0	0	0	0	0	0	0	0	0	0	1	0	0	1	1	1	0	0	0	0	0	0	0	1	1	1	1	0	0
Campylobacter jejuni subsp. jejuni NCTC 11168-K12E5	Bacteria	Proteobacteria	Epsilonproteobacteria	0	0	0	0	0	0	0	0	1	0	0	0	0	0	0	0	0	0	1	0	0	1	1	1	0	0	0	0	0	0	0	1	1	1	1	0	0
Campylobacter jejuni subsp. jejuni NCTC 11168-Kf1	Bacteria	Proteobacteria	Epsilonproteobacteria	0	0	0	0	0	0	0	0	1	0	0	0	0	0	0	0	0	0	1	0	0	1	1	1	0	0	0	0	0	0	0	1	1	1	1	0	0
Campylobacter jejuni subsp. jejuni NCTC 11168-mcK12E5	Bacteria	Proteobacteria	Epsilonproteobacteria	0	0	0	0	0	0	0	0	1	0	0	0	0	0	0	0	0	0	1	0	0	1	1	1	0	0	0	0	0	0	0	1	1	1	1	0	0
Campylobacter jejuni subsp. jejuni NCTC 11168-mfK12E5	Bacteria	Proteobacteria	Epsilonproteobacteria	0	0	0	0	0	0	0	0	1	0	0	0	0	0	0	0	0	0	1	0	0	1	1	1	0	0	0	0	0	0	0	1	1	1	1	0	0
Campylobacter jejuni subsp. jejuni NCTC 11168-GSv	Bacteria	Proteobacteria	Epsilonproteobacteria	0	0	0	0	0	0	0	0	1	0	0	0	0	0	0	0	0	0	1	0	0	1	1	1	0	0	0	0	0	0	0	1	1	1	1	0	0
Campylobacter jejuni subsp. jejuni strain 00-1597	Bacteria	Proteobacteria	Epsilonproteobacteria	0	0	0	0	0	0	0	0	1	0	0	0	0	0	0	0	0	0	1	0	0	1	1	1	0	0	0	0	0	0	0	1	1	1	1	0	0
Campylobacter jejuni subsp. jejuni strain 00-6200	Bacteria	Proteobacteria	Epsilonproteobacteria	0	0	0	0	0	0	0	0	1	0	0	0	0	0	0	0	0	0	1	0	0	1	1	1	0	0	0	0	0	0	0	1	1	1	1	0	0
Campylobacter jejuni subsp. jejuni strain 01-1512	Bacteria	Proteobacteria	Epsilonproteobacteria	0	0	0	0	0	0	0	0	1	0	0	0	0	0	0	0	0	0	1	0	0	1	1	1	0	0	0	0	0	0	0	1	1	1	1	0	0
Campylobacter jejuni subsp. jejuni strain 00-0949	Bacteria	Proteobacteria	Epsilonproteobacteria	0	0	0	0	0	0	0	0	1	0	0	0	0	0	0	0	0	0	1	0	0	1	1	1	0	0	0	0	0	0	0	1	1	1	1	0	0
Campylobacter jejuni subsp. jejuni strain 35925B2	Bacteria	Proteobacteria	Epsilonproteobacteria	0	0	0	0	0	0	0	0	1	0	0	0	0	0	0	0	0	0	1	0	0	1	1	1	0	0	0	0	0	0	0	1	1	1	1	0	0
Campylobacter jejuni subsp. jejuni strain RM3197	Bacteria	Proteobacteria	Epsilonproteobacteria	0	0	0	0	0	0	0	0	1	0	0	0	0	0	0	0	0	0	1	0	0	1	1	1	0	0	0	0	0	0	0	1	1	1	1	0	0
Campylobacter jejuni subsp. jejuni strain RM3196	Bacteria	Proteobacteria	Epsilonproteobacteria	0	0	0	0	0	0	0	0	1	0	0	0	0	0	0	0	0	0	1	0	0	1	1	1	0	0	0	0	0	0	0	1	1	1	1	0	0
Campylobacter jejuni strain RM1285	Bacteria	Proteobacteria	Epsilonproteobacteria	0	0	0	0	0	0	0	0	1	0	0	0	0	0	0	0	0	0	1	0	0	1	1	1	0	0	0	0	0	0	0	1	1	1	1	0	0
Campylobacter jejuni strain CJM1cam	Bacteria	Proteobacteria	Epsilonproteobacteria	0	0	0	0	0	0	0	0	0	0	0	0	0	0	0	0	0	0	1	0	0	1	1	1	0	0	0	0	0	0	0	1	1	1	1	0	0
Campylobacter jejuni genome assembly NCTC11351	Bacteria	Proteobacteria	Epsilonproteobacteria	0	0	0	0	0	0	0	0	1	0	0	0	0	0	0	0	0	0	1	0	0	1	1	1	0	0	0	0	0	0	0	1	1	1	1	0	0
Campylobacter jejuni strain CJ677CC519	Bacteria	Proteobacteria	Epsilonproteobacteria	0	0	0	0	0	0	0	0	0	0	0	0	0	0	0	0	0	0	1	0	0	1	1	1	0	0	0	0	0	0	0	1	1	1	1	0	0
Campylobacter jejuni strain CJ677CC002	Bacteria	Proteobacteria	Epsilonproteobacteria	0	0	0	0	0	0	0	0	0	0	0	0	0	0	0	0	0	0	1	0	0	1	1	1	0	0	0	0	0	0	0	1	1	1	1	0	0
Campylobacter jejuni strain CJ677CC534	Bacteria	Proteobacteria	Epsilonproteobacteria	0	0	0	0	0	0	0	0	0	0	0	0	0	0	0	0	0	0	1	0	0	1	1	1	0	0	0	0	0	0	0	1	1	1	1	0	0
Campylobacter jejuni strain CJ677CC536	Bacteria	Proteobacteria	Epsilonproteobacteria	0	0	0	0	0	0	0	0	0	0	0	0	0	0	0	0	0	0	1	0	0	1	1	1	0	0	0	0	0	0	0	1	1	1	1	0	0
Campylobacter jejuni strain CJ677CC073	Bacteria	Proteobacteria	Epsilonproteobacteria	0	0	0	0	0	0	0	0	0	0	0	0	0	0	0	0	0	0	1	0	0	1	1	1	0	0	0	0	0	0	0	1	1	1	1	0	0
Campylobacter jejuni strain CJ677CC521	Bacteria	Proteobacteria	Epsilonproteobacteria	0	0	0	0	0	0	0	0	0	0	0	0	0	0	0	0	0	0	1	0	0	1	1	1	0	0	0	0	0	0	0	1	1	1	1	0	0
Campylobacter jejuni strain CJ677CC526	Bacteria	Proteobacteria	Epsilonproteobacteria	0	0	0	0	0	0	0	0	0	0	0	0	0	0	0	0	0	0	1	0	0	1	1	1	0	0	0	0	0	0	0	1	1	1	1	0	0
Campylobacter jejuni strain CJ677CC036	Bacteria	Proteobacteria	Epsilonproteobacteria	0	0	0	0	0	0	0	0	0	0	0	0	0	0	0	0	0	0	1	0	0	1	1	1	0	0	0	0	0	0	0	1	1	1	1	0	0
Campylobacter jejuni strain CJ677CC524	Bacteria	Proteobacteria	Epsilonproteobacteria	0	0	0	0	0	0	0	0	0	0	0	0	0	0	0	0	0	0	1	0	0	1	1	1	0	0	0	0	0	0	0	1	1	1	1	0	0
Campylobacter jejuni strain CJ677CC016	Bacteria	Proteobacteria	Epsilonproteobacteria	0	0	0	0	0	0	0	0	0	0	0	0	0	0	0	0	0	0	1	0	0	1	1	1	0	0	0	0	0	0	0	1	1	1	1	0	0
Campylobacter jejuni strain CJ677CC041	Bacteria	Proteobacteria	Epsilonproteobacteria	0	0	0	0	0	0	0	0	0	0	0	0	0	0	0	0	0	0	1	0	0	1	1	1	0	0	0	0	0	0	0	1	1	1	1	0	0
Campylobacter jejuni strain CJ677CC535	Bacteria	Proteobacteria	Epsilonproteobacteria	0	0	0	0	0	0	0	0	0	0	0	0	0	0	0	0	0	0	1	0	0	1	1	1	0	0	0	0	0	0	0	1	1	1	1	0	0
Campylobacter jejuni strain CJ677CC092	Bacteria	Proteobacteria	Epsilonproteobacteria	0	0	0	0	0	0	0	0	0	0	0	0	0	0	0	0	0	0	1	0	0	1	1	1	0	0	0	0	0	0	0	1	1	1	1	0	0
Campylobacter jejuni strain CJ677CC530	Bacteria	Proteobacteria	Epsilonproteobacteria	0	0	0	0	0	0	0	0	0	0	0	0	0	0	0	0	0	0	1	0	0	1	1	1	0	0	0	0	0	0	0	1	1	1	1	0	0
Campylobacter jejuni strain CJ677CC532	Bacteria	Proteobacteria	Epsilonproteobacteria	0	0	0	0	0	0	0	0	0	0	0	0	0	0	0	0	0	0	1	0	0	1	1	1	0	0	0	0	0	0	0	1	1	1	1	0	0
Campylobacter jejuni strain CJ677CC529	Bacteria	Proteobacteria	Epsilonproteobacteria	0	0	0	0	0	0	0	0	0	0	0	0	0	0	0	0	0	0	1	0	0	1	1	1	0	0	0	0	0	0	0	1	1	1	1	0	0
Campylobacter jejuni strain CJ677CC062	Bacteria	Proteobacteria	Epsilonproteobacteria	0	0	0	0	0	0	0	0	0	0	0	0	0	0	0	0	0	0	1	0	0	1	1	1	0	0	0	0	0	0	0	1	1	1	1	0	0
Campylobacter jejuni strain CJ677CC059	Bacteria	Proteobacteria	Epsilonproteobacteria	0	0	0	0	0	0	0	0	0	0	0	0	0	0	0	0	0	0	1	0	0	1	1	1	0	0	0	0	0	0	0	1	1	1	1	0	0
Campylobacter jejuni strain CJ677CC032	Bacteria	Proteobacteria	Epsilonproteobacteria	0	0	0	0	0	0	0	0	0	0	0	0	0	0	0	0	0	0	1	0	0	1	1	1	0	0	0	0	0	0	0	1	1	1	1	0	0
Campylobacter jejuni strain CJ677CC033	Bacteria	Proteobacteria	Epsilonproteobacteria	0	0	0	0	0	0	0	0	0	0	0	0	0	0	0	0	0	0	1	0	0	1	1	1	0	0	0	0	0	0	0	1	1	1	1	0	0
Campylobacter jejuni strain CJ677CC537	Bacteria	Proteobacteria	Epsilonproteobacteria	0	0	0	0	0	0	0	0	0	0	0	0	0	0	0	0	0	0	1	0	0	1	1	1	0	0	0	0	0	0	0	1	1	1	1	0	0
Campylobacter jejuni strain CJ677CC542	Bacteria	Proteobacteria	Epsilonproteobacteria	0	0	0	0	0	0	0	0	0	0	0	0	0	0	0	0	0	0	1	0	0	1	1	1	0	0	0	0	0	0	0	1	1	1	1	0	0
Campylobacter jejuni strain CJ677CC528	Bacteria	Proteobacteria	Epsilonproteobacteria	0	0	0	0	0	0	0	0	0	0	0	0	0	0	0	0	0	0	1	0	0	1	1	1	0	0	0	0	0	0	0	1	1	1	1	0	0
Campylobacter jejuni strain CJ677CC538	Bacteria	Proteobacteria	Epsilonproteobacteria	0	0	0	0	0	0	0	0	0	0	0	0	0	0	0	0	0	0	1	0	0	1	1	1	0	0	0	0	0	0	0	1	1	1	1	0	0
Campylobacter jejuni strain CJ677CC520	Bacteria	Proteobacteria	Epsilonproteobacteria	0	0	0	0	0	0	0	0	0	0	0	0	0	0	0	0	0	0	1	0	0	1	1	1	0	0	0	0	0	0	0	1	1	1	1	0	0
Campylobacter jejuni strain CJ677CC014	Bacteria	Proteobacteria	Epsilonproteobacteria	0	0	0	0	0	0	0	0	0	0	0	0	0	0	0	0	0	0	1	0	0	1	1	1	0	0	0	0	0	0	0	1	1	1	1	0	0
Campylobacter jejuni strain CJ677CC039	Bacteria	Proteobacteria	Epsilonproteobacteria	0	0	0	0	0	0	0	0	0	0	0	0	0	0	0	0	0	0	1	0	0	1	1	1	0	0	0	0	0	0	0	1	1	1	1	0	0
Campylobacter jejuni strain CJ677CC085	Bacteria	Proteobacteria	Epsilonproteobacteria	0	0	0	0	0	0	0	0	0	0	0	0	0	0	0	0	0	0	1	0	0	1	1	1	0	0	0	0	0	0	0	1	1	1	1	0	0
Campylobacter jejuni strain CJ677CC052	Bacteria	Proteobacteria	Epsilonproteobacteria	0	0	0	0	0	0	0	0	0	0	0	0	0	0	0	0	0	0	1	0	0	1	1	1	0	0	0	0	0	0	0	1	1	1	1	0	0
Campylobacter jejuni strain CJ677CC527	Bacteria	Proteobacteria	Epsilonproteobacteria	0	0	0	0	0	0	0	0	0	0	0	0	0	0	0	0	0	0	1	0	0	1	1	1	0	0	0	0	0	0	0	1	1	1	1	0	0
Campylobacter jejuni strain CJ677CC078	Bacteria	Proteobacteria	Epsilonproteobacteria	0	0	0	0	0	0	0	0	0	0	0	0	0	0	0	0	0	0	1	0	0	1	1	1	0	0	0	0	0	0	0	1	1	1	1	0	0
Campylobacter jejuni strain CJ677CC523	Bacteria	Proteobacteria	Epsilonproteobacteria	0	0	0	0	0	0	0	0	0	0	0	0	0	0	0	0	0	0	1	0	0	1	1	1	0	0	0	0	0	0	0	1	1	1	1	0	0
Campylobacter jejuni strain CJ677CC540	Bacteria	Proteobacteria	Epsilonproteobacteria	0	0	0	0	0	0	0	0	0	0	0	0	0	0	0	0	0	0	1	0	0	1	1	1	0	0	0	0	0	0	0	1	1	1	1	0	0
Campylobacter jejuni strain CJ677CC040	Bacteria	Proteobacteria	Epsilonproteobacteria	0	0	0	0	0	0	0	0	0	0	0	0	0	0	0	0	0	0	1	0	0	1	1	1	0	0	0	0	0	0	0	1	1	1	1	0	0
Campylobacter jejuni strain CJ677CC061	Bacteria	Proteobacteria	Epsilonproteobacteria	0	0	0	0	0	0	0	0	0	0	0	0	0	0	0	0	0	0	1	0	0	1	1	1	0	0	0	0	0	0	0	1	1	1	1	0	0
Campylobacter jejuni strain CJ677CC539	Bacteria	Proteobacteria	Epsilonproteobacteria	0	0	0	0	0	0	0	0	0	0	0	0	0	0	0	0	0	0	1	0	0	1	1	1	0	0	0	0	0	0	0	1	1	1	1	0	0
Campylobacter jejuni strain CJ677CC533	Bacteria	Proteobacteria	Epsilonproteobacteria	0	0	0	0	0	0	0	0	0	0	0	0	0	0	0	0	0	0	1	0	0	1	1	1	0	0	0	0	0	0	0	1	1	1	1	0	0
Campylobacter jejuni strain CJ677CC047	Bacteria	Proteobacteria	Epsilonproteobacteria	0	0	0	0	0	0	0	0	0	0	0	0	0	0	0	0	0	0	1	0	0	1	1	1	0	0	0	0	0	0	0	1	1	1	1	0	0
Campylobacter jejuni strain CJ677CC058	Bacteria	Proteobacteria	Epsilonproteobacteria	0	0	0	0	0	0	0	0	0	0	0	0	0	0	0	0	0	0	1	0	0	1	1	1	0	0	0	0	0	0	0	1	1	1	1	0	0
Campylobacter jejuni strain CJ677CC013	Bacteria	Proteobacteria	Epsilonproteobacteria	0	0	0	0	0	0	0	0	0	0	0	0	0	0	0	0	0	0	1	0	0	1	1	1	0	0	0	0	0	0	0	1	1	1	1	0	0
Campylobacter jejuni strain CJ677CC100	Bacteria	Proteobacteria	Epsilonproteobacteria	0	0	0	0	0	0	0	0	0	0	0	0	0	0	0	0	0	0	1	0	0	1	1	1	0	0	0	0	0	0	0	1	1	1	1	0	0
Campylobacter jejuni strain CJ677CC522	Bacteria	Proteobacteria	Epsilonproteobacteria	0	0	0	0	0	0	0	0	0	0	0	0	0	0	0	0	0	0	1	0	0	1	1	1	0	0	0	0	0	0	0	1	1	1	1	0	0
Campylobacter jejuni strain CJ677CC094	Bacteria	Proteobacteria	Epsilonproteobacteria	0	0	0	0	0	0	0	0	0	0	0	0	0	0	0	0	0	0	1	0	0	1	1	1	0	0	0	0	0	0	0	1	1	1	1	0	0
Campylobacter jejuni strain CJ677CC008	Bacteria	Proteobacteria	Epsilonproteobacteria	0	0	0	0	0	0	0	0	0	0	0	0	0	0	0	0	0	0	1	0	0	1	1	1	0	0	0	0	0	0	0	1	1	1	1	0	0
Campylobacter jejuni strain CJ677CC541	Bacteria	Proteobacteria	Epsilonproteobacteria	0	0	0	0	0	0	0	0	0	0	0	0	0	0	0	0	0	0	1	0	0	1	1	1	0	0	0	0	0	0	0	1	1	1	1	0	0
Campylobacter jejuni strain CJ677CC024	Bacteria	Proteobacteria	Epsilonproteobacteria	0	0	0	0	0	0	0	0	0	0	0	0	0	0	0	0	0	0	1	0	0	1	1	1	0	0	0	0	0	0	0	1	1	1	1	0	0
Campylobacter jejuni strain CJ677CC064	Bacteria	Proteobacteria	Epsilonproteobacteria	0	0	0	0	0	0	0	0	0	0	0	0	0	0	0	0	0	0	1	0	0	1	1	1	0	0	0	0	0	0	0	1	1	1	1	0	0
Campylobacter jejuni strain CJ677CC525	Bacteria	Proteobacteria	Epsilonproteobacteria	0	0	0	0	0	0	0	0	0	0	0	0	0	0	0	0	0	0	1	0	0	1	1	1	0	0	0	0	0	0	0	1	1	1	1	0	0
Campylobacter jejuni strain CJ677CC026	Bacteria	Proteobacteria	Epsilonproteobacteria	0	0	0	0	0	0	0	0	0	0	0	0	0	0	0	0	0	0	1	0	0	1	1	1	0	0	0	0	0	0	0	1	1	1	1	0	0
Campylobacter jejuni strain CJ677CC034	Bacteria	Proteobacteria	Epsilonproteobacteria	0	0	0	0	0	0	0	0	0	0	0	0	0	0	0	0	0	0	1	0	0	1	1	1	0	0	0	0	0	0	0	1	1	1	1	0	0
Campylobacter jejuni strain CJ677CC086	Bacteria	Proteobacteria	Epsilonproteobacteria	0	0	0	0	0	0	0	0	0	0	0	0	0	0	0	0	0	0	1	0	0	1	1	1	0	0	0	0	0	0	0	1	1	1	1	0	0
Campylobacter jejuni strain CJ677CC095	Bacteria	Proteobacteria	Epsilonproteobacteria	0	0	0	0	0	0	0	0	0	0	0	0	0	0	0	0	0	0	1	0	0	1	1	1	0	0	0	0	0	0	0	1	1	1	1	0	0
Campylobacter jejuni strain CJ677CC012	Bacteria	Proteobacteria	Epsilonproteobacteria	0	0	0	0	0	0	0	0	0	0	0	0	0	0	0	0	0	0	1	0	0	1	1	1	0	0	0	0	0	0	0	1	1	1	1	0	0
Campylobacter jejuni strain RM3194.	Bacteria	Proteobacteria	Epsilonproteobacteria	0	0	0	0	0	0	0	0	1	0	0	0	0	0	0	0	0	0	1	0	0	1	1	1	0	0	0	0	0	0	0	1	1	1	1	0	0
Campylobacter jejuni strain OD267	Bacteria	Proteobacteria	Epsilonproteobacteria	0	0	0	0	0	0	0	0	1	0	0	0	0	0	0	0	0	0	1	0	0	1	1	1	0	0	0	0	0	0	0	1	1	1	1	0	0
Campylobacter jejuni strain WP2202	Bacteria	Proteobacteria	Epsilonproteobacteria	0	0	0	0	0	0	0	0	1	0	0	0	0	0	0	0	0	0	1	0	0	1	1	1	0	0	0	0	0	0	0	1	1	1	1	0	0
Campylobacter jejuni subsp. jejuni strain RM1285	Bacteria	Proteobacteria	Epsilonproteobacteria	0	0	0	0	0	0	0	0	1	0	0	0	0	0	0	0	0	0	1	0	0	1	1	1	0	0	0	0	0	0	0	1	1	1	1	0	0
Campylobacter jejuni subsp. jejuni strain 14980A	Bacteria	Proteobacteria	Epsilonproteobacteria	0	0	0	0	0	0	0	0	1	0	0	0	0	0	0	0	0	0	1	0	0	1	1	1	0	0	0	0	0	0	0	1	1	1	1	0	0
Campylobacter jejuni subsp. jejuni strain MTVDSCj07	Bacteria	Proteobacteria	Epsilonproteobacteria	0	0	0	0	0	0	0	0	0	0	0	0	0	0	0	0	0	0	1	0	0	1	1	1	0	0	0	0	0	0	0	1	1	1	1	0	0
Campylobacter jejuni subsp. jejuni strain MTVDSCj13	Bacteria	Proteobacteria	Epsilonproteobacteria	0	0	0	0	0	0	0	0	1	0	0	0	0	0	0	0	0	0	1	0	0	1	1	1	0	0	0	0	0	0	0	1	1	1	1	0	0
Campylobacter jejuni subsp. jejuni strain MTVDSCj16	Bacteria	Proteobacteria	Epsilonproteobacteria	0	0	0	0	0	0	0	0	1	0	0	0	0	0	0	0	0	0	1	0	0	1	1	1	0	0	0	0	0	0	0	1	1	1	1	0	0
Campylobacter jejuni subsp. jejuni str. RM3420	Bacteria	Proteobacteria	Epsilonproteobacteria	0	0	0	0	0	0	0	0	0	0	0	0	0	0	0	0	0	0	1	0	0	1	1	1	0	0	0	0	0	0	0	1	1	1	1	0	0
Campylobacter jejuni strain FJ3124	Bacteria	Proteobacteria	Epsilonproteobacteria	0	0	0	0	0	0	0	0	1	0	0	0	0	0	0	0	0	0	1	0	0	1	1	1	0	0	0	0	0	0	0	1	1	1	1	0	0
Campylobacter jejuni strain TS1218	Bacteria	Proteobacteria	Epsilonproteobacteria	0	0	0	0	0	0	0	0	0	0	0	0	0	0	0	0	0	0	1	0	0	1	1	1	0	0	0	0	0	0	0	1	1	1	1	0	0
Campylobacter jejuni strain IF1100	Bacteria	Proteobacteria	Epsilonproteobacteria	0	0	0	0	0	0	0	0	1	0	0	0	0	0	0	0	0	0	1	0	0	1	1	1	0	0	0	0	0	0	0	1	1	1	1	0	0
Campylobacter jejuni subsp. jejuni M129	Bacteria	Proteobacteria	Epsilonproteobacteria	0	0	0	0	0	0	0	0	0	0	0	0	0	0	0	0	0	0	1	0	0	1	1	1	0	0	0	0	0	0	0	1	1	1	1	0	0
Candidatus Kinetoplastibacterium blastocrithidii (ex Angomonas deanei ATCC 30255)	Bacteria	Proteobacteria	Betaproteobacteria	0	0	0	0	0	0	0	0	0	0	0	0	0	0	0	0	0	0	1	0	0	1	1	1	0	1	0	0	0	0	0	1	1	1	0	0	0
Candidatus Kinetoplastibacterium blastocrithidii TCC012E	Bacteria	Proteobacteria	Betaproteobacteria	0	0	0	0	0	0	0	0	0	0	0	0	0	0	0	0	0	0	1	0	0	1	1	1	0	1	0	0	0	0	0	1	1	1	0	0	0
Candidatus Kinetoplastibacterium crithidii (ex Angomonas deanei ATCC 30255)	Bacteria	Proteobacteria	Betaproteobacteria	0	0	0	0	0	0	0	0	0	0	0	0	0	0	0	0	0	0	1	0	0	1	1	1	0	1	0	0	0	0	0	1	1	1	0	0	0
Candidatus Kinetoplastibacterium crithidii TCC036E	Bacteria	Proteobacteria	Betaproteobacteria	0	0	0	0	0	0	0	0	0	0	0	0	0	0	0	0	0	0	1	0	0	1	1	1	0	1	0	0	0	0	0	1	1	1	0	0	0
Candidatus Kinetoplastibacterium desouzaii TCC079E	Bacteria	Proteobacteria	Betaproteobacteria	0	0	0	0	0	0	0	0	0	0	0	0	0	0	0	0	0	0	1	0	0	1	1	1	0	1	0	0	0	0	0	1	1	1	0	0	0
Candidatus Kinetoplastibacterium galatii TCC219	Bacteria	Proteobacteria	Betaproteobacteria	0	0	0	0	0	0	0	0	0	0	0	0	0	0	0	0	0	0	1	0	0	1	1	1	0	1	0	0	0	0	0	1	1	1	0	0	0
Candidatus Kinetoplastibacterium oncopeltii TCC290E	Bacteria	Proteobacteria	Betaproteobacteria	0	0	0	0	0	0	0	0	0	0	0	0	0	0	0	0	0	0	1	0	0	1	1	1	0	1	0	0	0	0	0	1	1	1	0	0	0
Candidatus Korarchaeum cryptofilum OPF8	Archaea	Candidatus_Korarchaeota	Candidatus_Korarchaeum	1	0	0	0	0	0	0	0	0	0	1	0	0	0	0	0	0	0	0	0	0	0	0	0	0	0	0	0	0	0	0	0	0	0	0	0	0
Candidatus Koribacter versatilis Ellin345	Bacteria	Acidobacteria	Acidobacteriales	0	0	0	0	0	0	0	0	0	0	0	0	0	0	0	0	0	1	1	0	0	1	1	1	1	1	0	0	0	1	0	1	1	1	1	0	0
Caldicellulosiruptor kronotskyensis 2002	Bacteria	Firmicutes	Clostridia	0	1	0	0	0	0	0	0	0	1	1	0	0	0	0	0	0	0	1	1	0	1	1	1	0	1	0	0	0	1	0	1	1	1	0	0	0
Caldicellulosiruptor kristjanssonii I77R1B	Bacteria	Firmicutes	Clostridia	0	1	0	0	0	0	0	0	0	1	0	1	1	0	0	0	0	0	1	1	0	1	1	1	0	1	0	0	0	1	0	1	1	1	0	0	0
Caldisphaera lagunensis DSM 15908	Archaea	Crenarchaeota	Thermoprotei	0	0	0	0	0	0	0	0	0	0	0	0	0	0	0	0	0	0	0	0	0	0	0	0	0	0	0	0	0	0	0	0	0	0	0	0	0
Campylobacter lari RM2100	Bacteria	Proteobacteria	Epsilonproteobacteria	0	0	0	0	0	0	0	0	0	0	0	0	0	0	0	0	0	0	1	0	0	1	1	1	0	0	0	0	0	0	0	0	1	1	1	0	0
Campylobacter lari subsp. concheus LMG 11760	Bacteria	Proteobacteria	Epsilonproteobacteria	0	0	0	0	0	0	0	0	0	0	0	0	0	0	0	0	0	0	1	0	0	1	1	1	0	0	0	0	0	0	0	0	1	1	1	0	0
Campylobacter lari NCTC 11845	Bacteria	Proteobacteria	Epsilonproteobacteria	0	0	0	0	0	0	0	0	1	0	0	0	0	0	0	0	0	0	1	0	0	1	1	1	0	0	0	0	0	0	0	1	1	1	1	0	0
Campylobacter lari CCUG 22395	Bacteria	Proteobacteria	Epsilonproteobacteria	0	0	0	0	0	0	0	0	1	0	0	0	0	0	0	0	0	0	1	0	0	1	1	1	0	0	0	0	0	0	0	1	1	1	1	0	0
Campylobacter lari RM16701	Bacteria	Proteobacteria	Epsilonproteobacteria	0	0	0	0	0	0	0	0	0	0	0	0	0	0	0	0	0	0	1	0	0	1	1	1	0	0	0	0	0	0	0	1	1	1	1	0	0
Campylobacter lari RM16712	Bacteria	Proteobacteria	Epsilonproteobacteria	0	0	0	0	0	0	0	0	0	0	0	0	0	0	0	0	0	0	1	0	0	1	1	1	0	0	0	0	0	0	0	1	1	1	1	0	0
Campylobacter lari strain Slaughter Beach	Bacteria	Proteobacteria	Epsilonproteobacteria	0	0	0	0	0	0	0	0	0	0	0	0	0	0	0	0	0	0	1	0	0	1	1	1	0	0	0	0	0	0	0	1	1	1	1	0	0
Caldicellulosiruptor lactoaceticus 6A	Bacteria	Firmicutes	Clostridia	0	1	0	1	0	0	0	0	0	1	0	0	1	0	0	0	0	0	1	1	0	1	1	1	0	1	0	0	0	1	0	1	1	0	0	0	0
Candidatus Liberibacter americanus str. Sao Paulo	Bacteria	Proteobacteria	Alphaproteobacteria	0	0	0	0	0	0	0	0	0	0	0	0	0	0	0	0	0	0	1	0	0	1	1	1	0	0	1	0	0	0	0	1	1	1	1	0	0
Candidatus Liberibacter africanus PTSAPSY	Bacteria	Proteobacteria	Alphaproteobacteria	0	0	0	0	0	0	0	0	0	0	0	0	0	0	0	0	0	0	1	0	0	1	1	1	0	0	1	0	0	1	0	1	1	1	0	0	0
Candidatus Liberibacter asiaticus str. psy62	Bacteria	Proteobacteria	Alphaproteobacteria	0	0	0	0	0	0	0	0	0	0	0	0	0	0	0	0	0	0	1	1	0	1	1	1	0	0	1	0	0	0	0	1	1	1	0	0	0
Candidatus Liberibacter asiaticus str. gxpsy	Bacteria	Proteobacteria	Alphaproteobacteria	0	0	0	0	0	0	0	0	0	0	0	0	0	0	0	0	0	0	1	1	0	1	1	1	0	0	1	0	0	0	0	1	1	1	1	0	0
Candidatus Liberibacter asiaticus strain A4	Bacteria	Proteobacteria	Alphaproteobacteria	0	0	0	0	0	0	0	0	0	0	0	0	0	0	0	0	0	0	1	1	0	1	1	1	0	0	1	0	0	0	0	1	1	1	1	0	0
Candidatus Liberibacter asiaticus str. Ishi-1 DNA	Bacteria	Proteobacteria	Alphaproteobacteria	0	0	0	0	0	0	0	0	0	0	0	0	0	0	0	0	0	0	1	1	0	1	1	1	0	0	1	0	0	0	0	1	1	1	1	0	0
Candidatus Liberibacter solanacearum CLso-ZC1	Bacteria	Proteobacteria	Alphaproteobacteria	0	0	0	0	0	0	0	0	0	0	0	0	0	0	0	0	0	0	1	1	0	1	1	1	0	0	1	0	0	1	0	1	1	1	1	0	0
Carnobacterium maltaromaticum LMA28 complete genome.	Bacteria	Firmicutes	Lactobacillales	0	0	0	0	0	0	0	0	0	0	0	0	0	0	0	0	0	0	1	1	0	1	1	1	1	1	0	0	1	1	1	1	0	1	1	0	0
Caldivirga maquilingensis IC-167	Archaea	Crenarchaeota	Thermoprotei	0	0	0	0	0	0	0	0	0	0	1	0	0	0	0	0	0	0	0	0	0	0	0	0	0	0	0	0	0	0	0	0	0	0	0	0	0
Candidatus Methanomethylophilus alvus Mx1201	Archaea	Euryarchaeota	Thermoplasmata	0	0	0	0	0	0	0	0	0	0	0	0	0	0	0	1	0	0	0	0	0	0	0	0	0	0	0	0	0	0	0	0	0	0	0	0	0
Candidatus Methanomassiliicoccus intestinalis Issoire-Mx1	Archaea	Euryarchaeota	Thermoplasmata	0	1	0	0	0	0	0	0	0	0	0	0	0	0	0	0	0	0	0	0	0	0	0	0	0	0	0	0	0	0	0	0	0	0	0	0	0
Candidatus Methanoplasma termitum strain MpT1	Archaea	Euryarchaeota	Thermoplasmata	0	0	0	0	0	0	0	0	0	0	0	0	0	0	0	1	0	0	0	0	0	0	0	0	0	0	0	0	0	0	0	0	0	0	0	0	0
Candidatus Methylopumilus planktonicus genome assembly Candidatus Methylopumilus planktonicus MMS-2-53	Bacteria	Proteobacteria	Betaproteobacteria	0	0	0	0	0	0	0	0	0	0	0	0	0	0	0	0	0	0	1	0	0	1	1	1	0	1	0	0	0	1	0	1	1	1	0	0	0
Candidatus Methylopumilus turicensis genome assembly Candidatus Methylopumilus turicensis MMS-10A-171	Bacteria	Proteobacteria	Betaproteobacteria	0	0	0	0	0	0	0	0	0	0	0	0	0	0	0	0	0	0	1	0	0	1	1	1	1	1	0	0	0	1	0	1	1	1	1	0	0
Enterobacteriaceae bacterium symbiont of Paracoccus marginatus isolate MEPMAR genome assembly	Bacteria	Proteobacteria	Gammaproteobacteria	0	0	0	0	0	0	0	0	0	0	0	0	0	0	0	0	0	0	1	0	0	0	0	0	0	0	1	0	0	0	0	0	1	1	0	0	1
Candidatus Midichloria mitochondrii IricVA	Bacteria	Proteobacteria	Alphaproteobacteria	0	0	0	0	0	0	0	0	0	0	0	0	0	0	0	0	0	0	1	0	0	1	1	1	0	0	0	0	0	0	0	0	1	1	0	0	0
Candidatus Moranella endobia PCIT	Bacteria	Proteobacteria	Gammaproteobacteria	0	0	0	0	0	0	0	0	0	0	0	0	0	0	0	0	0	0	1	0	0	1	1	0	0	0	0	0	0	0	0	0	1	1	0	0	0
Candidatus Moranella endobia PCVAL	Bacteria	Proteobacteria	Gammaproteobacteria	0	0	0	0	0	0	0	0	0	0	0	0	0	0	0	0	0	0	1	0	0	1	1	0	0	0	0	0	0	0	0	0	1	1	0	0	0
Candidatus Nitrosopumilus sp. AR2	Archaea	Thaumarchaeota	Nitrosopumilales	0	0	0	0	0	0	0	0	0	0	0	0	0	0	0	0	0	0	0	0	0	0	0	0	0	0	0	0	0	0	0	1	0	0	0	0	0
Ammonia-oxidizing marine archaeon V2	Archaea	Thaumarchaeota	unclassified_Thaumarchaeota	0	0	0	0	0	0	0	0	0	0	0	0	0	0	0	0	0	0	0	0	0	0	0	0	0	0	0	0	0	0	0	0	0	0	0	0	0
Candidatus Nitrosopumilus sp. NF5	Archaea	Thaumarchaeota	Nitrosopumilales	0	0	0	0	0	0	0	0	0	0	0	0	0	0	0	0	0	0	0	0	0	0	0	0	0	0	0	0	0	0	0	0	0	0	0	0	0
Thaumarchaeota archaeon SAT1	Archaea	Thaumarchaeota	unclassified_Thaumarchaeota	0	0	0	0	0	0	0	0	0	0	0	0	0	0	0	0	0	0	0	0	0	0	0	0	0	0	0	0	0	0	0	1	0	0	0	0	0
Nitrospira sp. ENR4 genome assembly NiCh1	Bacteria	Nitrospirae	Nitrospirales	0	0	1	0	0	0	0	0	0	0	1	0	0	1	0	0	0	0	1	0	0	1	1	1	0	1	0	0	0	1	0	1	0	1	1	0	0
Calditerrivibrio nitroreducens DSM 19672	Bacteria	Deferribacteres	Deferribacterales	0	0	0	0	0	0	0	0	0	1	0	0	0	0	0	0	0	0	1	0	0	1	1	1	0	1	0	0	0	1	0	1	1	1	1	0	0
Caldicellulosiruptor obsidiansis OB47	Bacteria	Firmicutes	Clostridia	0	1	0	0	0	0	0	0	0	1	1	0	0	0	0	0	0	0	1	1	0	1	1	1	0	1	0	0	0	1	0	1	1	1	0	0	0
Capnocytophaga ochracea DSM 7271	Bacteria	Bacteroidetes	Flavobacteriia	0	0	0	0	0	0	0	0	1	0	0	0	0	0	0	0	0	0	1	1	0	1	1	1	1	1	0	1	0	0	0	1	1	1	1	0	0
Caldicellulosiruptor owensensis OL	Bacteria	Firmicutes	Clostridia	0	1	0	0	0	0	0	0	0	1	0	0	0	0	0	0	0	0	1	1	0	1	1	1	0	1	0	0	0	1	0	1	1	1	0	0	0
Candidatus Pantoea carbekii DNA	Bacteria	Proteobacteria	Gammaproteobacteria	0	0	0	0	0	0	0	0	0	0	0	0	0	0	0	0	0	0	1	0	0	1	1	0	0	0	0	0	0	1	0	0	1	1	0	0	1
Candidatus Pantoea carbekii strain US	Bacteria	Proteobacteria	Gammaproteobacteria	0	0	0	0	0	0	0	0	0	0	0	0	0	0	0	0	0	0	1	0	0	1	1	0	0	0	0	0	0	1	0	0	1	1	0	0	1
Candidatus Paracaedibacter acanthamoebae isolate PRA3	Bacteria	Proteobacteria	Alphaproteobacteria	0	0	0	0	0	0	0	0	0	0	0	0	0	0	0	0	0	0	1	0	0	1	1	1	0	0	0	0	0	1	0	1	1	1	1	0	0
Candidatus Pelagibacter sp. IMCC9063	Bacteria	Proteobacteria	Alphaproteobacteria	0	0	0	0	0	0	0	0	0	0	0	0	0	0	0	0	0	0	1	0	0	1	1	1	0	1	1	0	0	1	0	1	0	0	0	0	0
Candidatus Pelagibacter ubique HTCC1062	Bacteria	Proteobacteria	Alphaproteobacteria	0	0	0	0	0	0	0	0	0	0	0	0	0	0	0	0	0	0	1	0	0	1	1	1	0	1	1	0	0	1	0	0	0	0	0	0	0
Campylobacter peloridis LMG 23910	Bacteria	Proteobacteria	Epsilonproteobacteria	0	0	0	0	0	0	0	0	1	0	0	0	0	0	0	0	0	0	1	0	0	1	1	1	0	0	0	0	0	0	0	1	1	1	1	0	0
Candidatus Phytoplasma mali strain AT complete chromosome.	Bacteria	Tenericutes	Mollicutes	0	0	0	0	0	0	0	0	0	0	0	0	0	0	0	0	0	0	1	0	0	1	0	1	0	0	0	0	0	0	1	0	0	1	0	0	0
Candidatus Phytoplasma australiense complete genome.	Bacteria	Tenericutes	Mollicutes	0	0	0	0	0	0	0	0	0	0	0	0	0	0	0	0	0	0	0	0	0	0	0	0	0	0	0	0	0	0	0	0	0	0	0	0	0
Candidatus Portiera aleyrodidarum BT-B	Bacteria	Proteobacteria	Gammaproteobacteria	0	0	0	0	0	0	0	0	0	0	0	0	0	0	0	0	0	0	0	0	0	0	0	0	0	0	0	0	0	0	0	0	0	0	0	0	0
Candidatus Portiera aleyrodidarum BT-QVLC	Bacteria	Proteobacteria	Gammaproteobacteria	0	0	0	0	0	0	0	0	0	0	0	0	0	0	0	0	0	0	0	0	0	0	0	0	0	0	0	0	0	0	0	0	0	0	0	0	0
Candidatus Portiera aleyrodidarum MED (Bemisia tabaci) strain BT-Q	Bacteria	Proteobacteria	Gammaproteobacteria	0	0	0	0	0	0	0	0	0	0	0	0	0	0	0	0	0	0	0	0	0	0	0	0	0	0	0	0	0	0	0	0	0	0	0	0	0
Candidatus Profftella armatura	Bacteria	Proteobacteria	Betaproteobacteria	0	0	0	0	0	0	0	0	0	0	0	0	0	0	0	0	0	0	0	0	0	0	0	0	0	0	1	0	0	0	0	0	0	0	0	0	0
Candidatus Profftella armatura strain YCPA	Bacteria	Proteobacteria	Betaproteobacteria	0	0	0	0	0	0	0	0	0	0	0	0	0	0	0	0	0	0	0	0	0	0	0	0	0	0	1	0	0	0	0	0	0	0	0	0	0
Candidatus Puniceispirillum marinum IMCC1322	Bacteria	Proteobacteria	Alphaproteobacteria	0	0	0	0	0	0	0	0	1	0	0	0	0	0	0	0	0	0	1	0	0	1	1	1	0	1	0	0	0	1	0	1	0	1	1	0	0
Candidatus Rhodoluna planktonica strain MWH-Dar1	Bacteria	Actinobacteria	Micrococcales	0	0	0	0	0	0	0	0	0	0	0	0	0	0	0	0	0	0	1	1	0	1	0	1	0	1	0	0	0	1	0	1	1	1	0	1	0
Candidatus Riesia pediculicola USDA	Bacteria	Proteobacteria	Gammaproteobacteria	0	0	0	0	0	0	0	0	0	0	0	0	0	0	0	0	0	0	1	0	0	1	0	0	0	0	0	0	0	0	0	0	1	0	0	0	0
Candidatus Ruthia magnifica str. Cm (Calyptogena magnifica)	Bacteria	Proteobacteria	Gammaproteobacteria	0	0	0	0	0	0	0	0	0	0	0	0	0	0	0	0	0	0	0	0	0	1	1	0	0	0	1	0	0	0	0	0	0	0	1	0	0
Caldicellulosiruptor saccharolyticus DSM 8903	Bacteria	Firmicutes	Clostridia	0	1	0	0	0	0	0	0	0	1	0	0	1	0	0	0	0	0	1	1	0	1	1	1	0	1	0	0	0	1	0	1	1	1	0	0	0
Caulobacter segnis ATCC 21756	Bacteria	Proteobacteria	Alphaproteobacteria	0	0	0	0	0	0	0	0	0	0	0	0	0	0	0	0	0	1	1	0	0	1	1	1	1	0	0	0	0	1	0	1	1	0	1	0	0
Candidatus Sodalis pierantonius str. SOPE	Bacteria	Proteobacteria	Gammaproteobacteria	0	0	0	0	0	0	0	0	0	0	0	0	0	0	0	0	0	0	1	0	0	1	1	1	0	1	1	1	0	1	0	1	1	0	0	0	1
Solibacter usitatus Ellin6076	Bacteria	Acidobacteria	Solibacteres	0	0	0	0	0	0	0	0	0	1	0	0	0	0	0	0	0	1	1	0	0	1	1	1	1	1	0	0	0	1	0	1	1	1	1	0	0
Campylobacter sp. RM16704	Bacteria	Proteobacteria	Epsilonproteobacteria	0	0	0	0	0	0	0	0	1	0	0	0	0	0	0	0	0	0	1	0	0	1	1	1	0	0	0	0	0	0	0	0	1	1	1	0	0
Carnobacterium sp. 17-4	Bacteria	Firmicutes	Lactobacillales	0	0	0	0	0	0	0	0	0	0	0	0	0	0	0	0	0	0	1	1	0	1	1	1	1	1	0	0	1	1	1	1	0	1	1	0	0
Calothrix sp. PCC 6303	Bacteria	Cyanobacteria	Nostocales	0	0	0	1	0	0	0	0	0	0	0	0	0	0	0	0	0	0	1	1	0	1	1	1	1	0	0	1	0	1	0	1	1	1	0	0	0
Caulobacter sp. K31	Bacteria	Proteobacteria	Alphaproteobacteria	0	0	0	0	0	0	0	0	0	0	0	0	0	0	0	0	0	1	1	0	0	1	1	1	1	0	0	0	0	1	0	1	1	1	1	0	0
Calothrix sp. PCC 7507	Bacteria	Cyanobacteria	Nostocales	0	0	0	1	0	0	0	0	0	0	0	0	1	0	0	0	0	0	1	1	0	1	1	1	1	0	0	1	0	1	0	1	1	1	0	0	0
Campylobacter subantarcticus LMG 24374	Bacteria	Proteobacteria	Epsilonproteobacteria	0	0	0	0	0	0	0	0	1	0	0	0	0	0	0	0	0	0	1	0	0	1	1	1	0	0	0	0	0	0	0	1	1	1	1	0	0
Campylobacter subantarcticus LMG 24377	Bacteria	Proteobacteria	Epsilonproteobacteria	0	0	0	0	0	0	0	0	0	0	0	0	0	0	0	0	0	0	1	0	0	1	1	1	0	0	0	0	0	0	0	1	1	1	1	0	0
Thermoanaerobacter tengcongensis MB4	Bacteria	Firmicutes	Clostridia	0	1	0	0	0	0	0	0	0	0	1	0	0	0	0	0	0	0	0	1	0	1	1	1	0	1	0	1	0	0	1	1	1	1	1	0	0
Candidatus Symbiobacter mobilis CR	Bacteria	Proteobacteria	Betaproteobacteria	0	0	0	0	0	1	0	0	0	0	1	0	0	0	0	0	0	0	1	0	0	1	1	1	1	1	0	0	0	1	0	1	1	0	1	0	0
Candidatus Tachikawaea gelatinosa DNA	Bacteria	Proteobacteria	Gammaproteobacteria	0	0	0	0	0	0	0	0	0	0	0	0	0	0	0	0	0	0	1	0	0	1	1	0	0	0	0	0	0	0	0	0	1	0	0	0	0
Thermodesulfobacteriaceae bacterium TF1 DNA	Bacteria	Thermodesulfobacteria	Thermodesulfobacteriales	0	0	0	0	0	0	0	0	0	0	0	0	0	0	0	0	0	0	1	0	0	1	1	1	0	0	0	1	0	1	0	1	1	1	1	0	0
Campylobacter ureolyticus RIGS 9880	Bacteria	Proteobacteria	Epsilonproteobacteria	0	0	0	0	0	0	0	0	0	0	0	0	0	0	0	0	0	0	1	0	0	1	1	1	0	0	0	0	0	0	0	1	1	1	1	0	0
Candidatus Vesicomyosocius okutanii HA DNA	Bacteria	Proteobacteria	Gammaproteobacteria	0	0	0	0	0	0	0	0	0	0	0	0	0	0	0	0	0	0	0	0	0	1	1	0	0	0	1	0	0	0	0	0	0	1	1	0	0
Campylobacter volucris LMG 24379	Bacteria	Proteobacteria	Epsilonproteobacteria	0	0	0	0	0	0	0	0	0	0	0	0	0	0	0	0	0	0	1	0	0	1	1	1	0	0	0	0	0	0	0	0	1	1	1	0	0
Candidatus Xiphinematobacter sp. Idaho Grape	Bacteria	Verrucomicrobia	Spartobacteria	0	0	0	0	0	0	0	0	0	0	0	0	0	0	0	0	0	0	1	0	0	0	1	1	0	0	0	0	0	0	0	0	1	1	0	0	0
Cellulophaga algicola DSM 14237	Bacteria	Bacteroidetes	Flavobacteriia	0	0	0	0	0	0	0	0	0	0	0	0	0	0	0	0	0	0	1	1	0	1	1	1	1	1	0	0	0	0	0	1	1	1	1	0	0
Cellulophaga baltica 18	Bacteria	Bacteroidetes	Flavobacteriia	0	0	0	0	0	0	0	0	0	0	0	0	0	0	0	0	0	0	1	1	0	1	1	1	1	1	0	0	0	0	0	1	1	1	1	0	0
Cellulophaga baltica NN016038	Bacteria	Bacteroidetes	Flavobacteriia	0	0	0	0	0	0	0	0	0	0	0	0	0	0	0	0	0	1	1	1	0	1	1	1	1	1	0	0	0	0	0	1	1	1	1	0	0
Cellulomonas fimi ATCC 484	Bacteria	Actinobacteria	Micrococcales	0	0	0	0	1	0	0	0	0	0	0	0	0	0	0	0	0	1	1	1	0	1	0	1	1	1	0	0	0	1	0	1	1	1	0	1	1
Cellulomonas flavigena DSM 20109	Bacteria	Actinobacteria	Micrococcales	0	0	0	0	0	0	0	0	0	0	0	0	0	0	0	0	0	1	1	1	0	1	0	1	1	1	0	0	0	1	0	1	1	1	0	1	1
Cellvibrio gilvus ATCC 13127	Bacteria	Actinobacteria	Micrococcales	0	0	0	0	0	0	0	0	0	0	0	0	0	0	0	0	0	1	1	1	0	1	0	1	1	1	0	0	0	1	0	1	1	1	0	1	1
Celeribacter indicus strain P73	Bacteria	Proteobacteria	Alphaproteobacteria	0	0	0	0	0	0	0	0	0	0	0	0	0	0	0	0	0	1	1	0	0	1	1	1	1	0	0	0	0	1	0	1	1	1	1	0	0
Cellvibrio japonicus Ueda107	Bacteria	Proteobacteria	Gammaproteobacteria	0	0	1	0	0	0	0	0	0	0	0	0	0	0	0	0	0	0	1	1	0	1	1	1	1	1	1	0	0	1	0	1	1	1	1	0	0
Cellulophaga lytica DSM 7489	Bacteria	Bacteroidetes	Flavobacteriia	0	0	0	0	0	0	0	0	0	0	0	0	0	0	0	0	0	0	1	1	0	1	1	1	1	1	0	0	0	1	0	1	1	1	1	0	0
Cellulophaga lytica strain HI1	Bacteria	Bacteroidetes	Flavobacteriia	0	0	0	0	0	0	0	0	0	0	0	0	0	0	0	0	0	0	1	1	0	1	1	1	1	1	0	0	0	1	0	1	1	1	1	0	0
Celeribacter marinus strain IMCC 12053	Bacteria	Proteobacteria	Alphaproteobacteria	0	0	0	0	0	0	0	0	0	0	0	0	0	0	0	0	0	0	1	0	0	1	1	1	1	0	0	0	0	1	0	1	1	1	1	0	0
Cedecea neteri strain SSMD04	Bacteria	Proteobacteria	Gammaproteobacteria	0	0	0	0	0	0	0	0	0	0	0	0	0	0	0	0	0	0	1	1	0	1	1	1	1	1	1	1	0	1	0	1	1	1	0	0	1
Cedecea neteri strain M006	Bacteria	Proteobacteria	Gammaproteobacteria	0	0	0	0	0	0	0	0	0	0	0	0	0	0	0	0	0	0	1	1	0	1	1	1	1	1	1	1	0	1	0	1	1	1	0	0	1
Cedecea neteri strain ND14a	Bacteria	Proteobacteria	Gammaproteobacteria	0	0	0	0	0	0	0	0	0	0	0	0	0	0	0	0	0	0	1	1	0	1	1	1	1	1	1	1	0	1	0	1	1	1	0	0	1
Cedecea neteri strain ND14b	Bacteria	Proteobacteria	Gammaproteobacteria	0	0	0	0	1	1	0	0	0	0	0	0	0	0	0	0	0	0	1	1	0	1	1	1	1	1	1	1	0	1	0	1	1	1	0	0	1
Chlamydophila abortus strain S26/3	Bacteria	Chlamydiae	Chlamydiales	0	0	0	0	0	0	0	0	0	0	0	0	0	0	0	0	0	0	1	1	0	1	1	1	0	0	0	0	0	0	0	0	1	1	0	0	1
Chlamydophila abortus genome assembly CAAB7	Bacteria	Chlamydiae	Chlamydiales	0	0	0	0	0	0	0	0	0	0	0	0	0	0	0	0	0	0	1	1	0	1	1	1	0	0	0	0	0	0	0	0	1	1	0	0	1
Chlamydophila abortus strain 1H genome assembly	Bacteria	Chlamydiae	Chlamydiales	0	0	0	0	0	0	0	0	0	0	0	0	0	0	0	0	0	0	1	1	0	1	1	1	0	0	0	0	0	0	0	0	1	1	0	0	1
Chloroflexus aggregans DSM 9485	Bacteria	Chloroflexi	Chloroflexia	0	1	0	0	0	0	0	0	0	1	0	1	1	0	0	0	0	0	1	1	0	1	1	1	0	1	0	1	0	1	0	1	1	1	0	0	0
Chloroflexus aurantiacus J-10-fl chromosome	Bacteria	Chloroflexi	Chloroflexia	0	1	0	0	0	0	0	0	0	1	0	0	1	0	0	0	0	0	1	1	0	1	1	1	1	1	0	1	0	1	0	1	1	1	0	0	0
Chlamydia avium 10DC88	Bacteria	Chlamydiae	Chlamydiales	0	0	0	0	0	0	0	0	0	0	0	0	0	0	0	0	0	0	1	1	0	0	0	1	0	0	0	0	0	0	0	0	1	1	0	0	1
Chlamydophila caviae GPIC	Bacteria	Chlamydiae	Chlamydiales	0	0	0	0	0	0	0	0	0	0	0	0	0	0	0	0	0	0	1	1	0	1	1	1	0	0	0	0	0	0	0	0	1	1	0	0	1
Chlorobium chlorochromatii CaD3	Bacteria	Chlorobi	Chlorobia	0	0	1	0	0	0	0	0	0	0	0	0	0	0	0	0	0	0	1	1	0	1	1	1	0	1	0	0	0	0	0	1	1	1	0	0	1
Chondromyces crocatus strain Cm c5	Bacteria	Proteobacteria	Deltaproteobacteria	1	0	1	0	0	0	0	0	0	0	0	0	0	0	0	0	0	1	1	1	0	1	1	1	0	0	0	0	0	1	0	1	0	1	1	0	0
Chlamydia felis Fe/C-56 Fe/C-56 DNA	Bacteria	Chlamydiae	Chlamydiales	0	0	0	0	0	0	0	0	0	0	0	0	0	0	0	0	0	0	1	1	0	1	1	1	0	0	0	0	0	0	0	0	1	1	0	0	1
Chryseobacterium gallinarum strain DSM 27622	Bacteria	Bacteroidetes	Flavobacteriia	0	0	0	0	0	0	0	0	1	0	0	0	0	0	0	0	0	1	1	1	0	1	1	1	1	1	0	0	0	0	0	1	1	1	1	0	0
Chlorobium limicola DSM 245	Bacteria	Chlorobi	Chlorobia	0	1	0	0	0	0	0	0	0	0	0	1	0	0	0	0	0	0	1	1	0	1	1	1	1	1	0	1	0	1	0	1	1	1	0	0	1
Chlorobaculum limnaeum strain DSM 1677	Bacteria	Chlorobi	Chlorobia	0	0	1	0	1	0	0	0	0	0	0	0	1	0	0	0	0	0	1	1	0	1	1	1	1	1	0	1	0	1	0	1	1	1	0	0	1
Chlorobium luteolum DSM 273	Bacteria	Chlorobi	Chlorobia	0	0	1	0	0	0	0	0	0	0	0	0	0	0	0	0	0	0	1	1	0	1	1	1	1	0	0	0	0	1	0	1	1	1	0	0	1
Serratia multitudinisentens RB-25	Bacteria	Proteobacteria	Gammaproteobacteria	0	0	0	0	0	1	0	0	0	0	0	0	0	0	0	0	0	0	1	1	0	1	1	1	1	1	1	1	0	1	0	1	1	1	0	0	1
Chlamydia muridarum Nigg	Bacteria	Chlamydiae	Chlamydiales	0	0	0	0	0	0	0	0	0	0	0	0	0	0	0	0	0	0	1	1	0	1	1	1	0	0	0	0	0	0	0	0	1	1	0	0	1
Chlamydia muridarum str. Nigg 2 MCR	Bacteria	Chlamydiae	Chlamydiales	0	0	0	0	0	0	0	0	0	0	0	0	0	0	0	0	0	0	1	1	0	1	1	1	0	0	0	0	0	0	0	0	1	1	0	0	1
Chlamydia muridarum strain Nigg3 clone G0.1.1	Bacteria	Chlamydiae	Chlamydiales	0	0	0	0	0	0	0	0	0	0	0	0	0	0	0	0	0	0	1	1	0	1	1	1	0	0	0	0	0	0	0	0	1	1	0	0	1
Chlamydia muridarum strain Nigg3 clone G28.38.1	Bacteria	Chlamydiae	Chlamydiales	0	0	0	0	0	0	0	0	0	0	0	0	0	0	0	0	0	0	1	1	0	1	1	1	0	0	0	0	0	0	0	0	1	1	0	0	1
Chlamydia muridarum strain Nigg3	Bacteria	Chlamydiae	Chlamydiales	0	0	0	0	0	0	0	0	0	0	0	0	0	0	0	0	0	0	1	1	0	1	1	1	0	0	0	0	0	0	0	0	1	1	0	0	1
Chlamydia muridarum str. Nigg3 CMUT3-5 strain Nigg	Bacteria	Chlamydiae	Chlamydiales	0	0	0	0	0	0	0	0	0	0	0	0	0	0	0	0	0	0	1	1	0	1	1	1	0	0	0	0	0	0	0	0	1	1	0	0	1
Chlamydia muridarum str. Nigg CM972	Bacteria	Chlamydiae	Chlamydiales	0	0	0	0	0	0	0	0	0	0	0	0	0	0	0	0	0	0	1	1	0	1	1	1	0	0	0	0	0	0	0	0	1	1	0	0	1
Chlorobaculum parvum NCIB 8327	Bacteria	Chlorobi	Chlorobia	0	0	0	0	0	0	0	0	0	1	0	0	0	0	0	0	0	0	1	1	0	1	1	1	1	1	0	1	0	0	0	1	1	1	0	0	1
Chlamydophila pecorum E58	Bacteria	Chlamydiae	Chlamydiales	0	0	0	0	0	0	0	0	0	0	0	0	0	0	0	0	0	0	1	1	0	1	1	1	0	0	0	0	0	0	0	0	1	1	0	0	1
Chlamydia pecorum PV3056/3	Bacteria	Chlamydiae	Chlamydiales	0	0	0	0	0	0	0	0	0	0	0	0	0	0	0	0	0	0	1	1	0	1	1	1	0	0	0	0	0	0	0	0	1	1	0	0	1
Chlorobium phaeovibrioides DSM 265	Bacteria	Chlorobi	Chlorobia	0	0	1	0	0	0	0	0	0	0	0	0	0	0	0	0	0	0	1	1	0	1	1	1	1	0	0	1	0	1	0	1	1	1	0	0	1
Chlorobium phaeobacteroides DSM 266	Bacteria	Chlorobi	Chlorobia	0	0	1	0	0	0	0	0	0	1	0	0	0	0	0	0	0	0	1	1	0	1	1	1	1	1	0	1	0	1	0	1	1	1	0	0	1
Chlorobium phaeobacteroides BS1	Bacteria	Chlorobi	Chlorobia	0	0	0	0	1	0	0	0	0	1	0	0	0	0	0	0	0	0	1	1	0	1	1	1	1	1	0	0	0	1	0	1	1	1	0	0	0
Chitinophaga pinensis DSM 2588	Bacteria	Bacteroidetes	Chitinophagia	0	0	0	0	0	0	0	0	0	0	0	0	0	0	0	0	0	1	1	1	0	1	1	1	1	1	0	1	0	0	0	1	1	1	0	0	1
Chlamydophila pneumoniae CWL029 chromosome	Bacteria	Chlamydiae	Chlamydiales	0	0	0	0	0	0	0	0	0	0	0	0	0	0	0	0	0	0	1	0	0	1	1	1	0	0	0	0	0	0	0	0	1	1	0	0	1
Chlamydophila pneumoniae J138 genomic DNA	Bacteria	Chlamydiae	Chlamydiales	0	0	0	0	0	0	0	0	0	0	0	0	0	0	0	0	0	0	1	0	0	1	1	1	0	0	0	0	0	0	0	0	1	1	0	0	1
Chlamydophila pneumoniae LPCoLN	Bacteria	Chlamydiae	Chlamydiales	0	0	0	0	0	0	0	0	0	0	0	0	0	0	0	0	0	0	1	1	0	1	1	1	0	0	0	0	0	0	0	0	1	1	0	0	1
Chlamydia pneumoniae genome assembly Wien1	Bacteria	Chlamydiae	Chlamydiales	0	0	0	0	0	0	0	0	0	0	0	0	0	0	0	0	0	0	1	0	0	1	1	1	0	0	0	0	0	0	0	0	1	1	0	0	1
Chlamydia pneumoniae genome assembly Wien3	Bacteria	Chlamydiae	Chlamydiales	0	0	0	0	0	0	0	0	0	0	0	0	0	0	0	0	0	0	1	0	0	1	1	1	0	0	0	0	0	0	0	0	1	1	0	0	1
Chlamydophila psittaci 6BC	Bacteria	Chlamydiae	Chlamydiales	0	0	0	0	0	0	0	0	0	0	0	0	0	0	0	0	0	0	1	1	0	1	1	1	0	0	0	0	0	0	0	0	1	1	0	0	1
Chlamydophila psittaci C19/98	Bacteria	Chlamydiae	Chlamydiales	0	0	0	0	0	0	0	0	0	0	0	0	0	0	0	0	0	0	1	1	0	1	1	1	0	0	0	0	0	0	0	0	1	1	0	0	1
Chlamydophila psittaci 01DC11	Bacteria	Chlamydiae	Chlamydiales	0	0	0	0	0	0	0	0	0	0	0	0	0	0	0	0	0	0	1	1	0	1	1	1	0	0	0	0	0	0	0	0	1	1	0	0	1
Chlamydophila psittaci 02DC15	Bacteria	Chlamydiae	Chlamydiales	0	0	0	0	0	0	0	0	0	0	0	0	0	0	0	0	0	0	1	1	0	1	1	1	0	0	0	0	0	0	0	0	1	1	0	0	1
Chlamydophila psittaci 08DC60	Bacteria	Chlamydiae	Chlamydiales	0	0	0	0	0	0	0	0	0	0	0	0	0	0	0	0	0	0	1	1	0	1	1	1	0	0	0	0	0	0	0	0	1	1	0	0	1
Chlamydia psittaci GR9	Bacteria	Chlamydiae	Chlamydiales	0	0	0	0	0	0	0	0	0	0	0	0	0	0	0	0	0	0	1	1	0	1	1	1	0	0	0	0	0	0	0	0	1	1	0	0	1
Chlamydia psittaci MN	Bacteria	Chlamydiae	Chlamydiales	0	0	0	0	0	0	0	0	0	0	0	0	0	0	0	0	0	0	1	1	0	1	1	1	0	0	0	0	0	0	0	0	1	1	0	0	1
Chlamydia psittaci VS225	Bacteria	Chlamydiae	Chlamydiales	0	0	0	0	0	0	0	0	0	0	0	0	0	0	0	0	0	0	1	1	0	1	1	1	0	0	0	0	0	0	0	0	1	1	0	0	1
Chlamydia psittaci WS/RT/E30	Bacteria	Chlamydiae	Chlamydiales	0	0	0	0	0	0	0	0	0	0	0	0	0	0	0	0	0	0	1	1	0	1	1	1	0	0	0	0	0	0	0	0	1	1	0	0	1
Chlamydia psittaci M56	Bacteria	Chlamydiae	Chlamydiales	0	0	0	0	0	0	0	0	0	0	0	0	0	0	0	0	0	0	1	1	0	1	1	1	0	0	0	0	0	0	0	0	1	1	0	0	1
Chlamydia psittaci WC	Bacteria	Chlamydiae	Chlamydiales	0	0	0	0	0	0	0	0	0	0	0	0	0	0	0	0	0	0	1	1	0	1	1	1	0	0	0	0	0	0	0	0	1	1	0	0	1
Chromohalobacter salexigens DSM 3043	Bacteria	Proteobacteria	Gammaproteobacteria	0	0	0	0	1	0	0	0	0	0	0	0	0	0	0	0	0	0	1	1	0	1	1	1	1	1	1	1	0	1	0	1	1	1	0	0	1
Chryseobacterium sp. IHB B 10212 strain IHBB 10212	Bacteria	Bacteroidetes	Flavobacteriia	0	0	0	0	0	0	0	0	0	0	0	0	0	0	0	0	0	0	1	1	0	1	1	1	1	1	0	0	0	0	0	1	1	1	1	0	0
Chelatococcus sp. CO-6	Bacteria	Proteobacteria	Alphaproteobacteria	0	0	1	0	0	0	0	0	0	0	0	0	0	0	0	0	0	1	1	0	0	1	1	1	1	0	0	0	0	1	0	1	1	1	1	0	0
Chelativorans sp. BNC1	Bacteria	Proteobacteria	Alphaproteobacteria	0	0	0	0	0	0	0	0	0	0	0	0	0	0	0	0	0	1	1	1	0	1	1	1	0	0	0	0	0	1	0	1	1	1	1	0	0
Chloroflexus sp. Y-400-fl	Bacteria	Chloroflexi	Chloroflexia	0	1	0	0	0	0	0	0	0	1	0	0	1	0	0	0	0	0	1	1	0	1	1	1	1	1	0	1	0	1	0	1	1	1	0	0	0
Chlorobium tepidum TLS chromosome	Bacteria	Chlorobi	Chlorobia	0	0	1	0	1	0	0	0	0	0	0	0	0	0	0	0	0	0	1	1	0	1	1	1	0	1	0	1	0	0	0	1	1	1	0	0	1
Chloroherpeton thalassium ATCC 35110	Bacteria	Chlorobi	Chlorobia	0	0	0	0	0	0	0	0	0	0	1	0	0	0	0	0	0	0	1	1	0	1	1	1	1	1	0	1	0	1	0	1	1	1	0	0	0
Chloracidobacterium thermophilum B chromosome 1	Bacteria	Acidobacteria	Blastocatellia	1	0	0	0	0	0	0	0	0	0	1	0	0	1	0	0	0	0	1	1	0	1	1	1	0	0	0	1	0	0	0	1	0	1	1	0	0
Chroococcidiopsis thermalis PCC 7203	Bacteria	Cyanobacteria	Chroococcidiopsidales	0	0	0	0	0	0	0	0	0	0	0	0	0	0	0	0	0	0	1	1	0	1	1	1	1	0	0	1	0	1	0	1	1	1	0	0	0
Chlamydia trachomatis D/UW-3/CX chromosome	Bacteria	Chlamydiae	Chlamydiales	0	0	0	0	0	0	0	0	0	0	0	0	0	0	0	0	0	0	1	1	0	1	1	1	0	0	0	0	0	0	0	0	1	1	0	0	1
Chlamydia trachomatis B/TZ1A828/OT	Bacteria	Chlamydiae	Chlamydiales	0	0	0	0	0	0	0	0	0	0	0	0	0	0	0	0	0	0	1	1	0	1	1	1	0	0	0	0	0	0	0	0	1	1	0	0	1
Chlamydia trachomatis B/Jali20/OT	Bacteria	Chlamydiae	Chlamydiales	0	0	0	0	0	0	0	0	0	0	0	0	0	0	0	0	0	0	1	1	0	1	1	1	0	0	0	0	0	0	0	0	1	1	0	0	1
Chlamydia trachomatis D-EC	Bacteria	Chlamydiae	Chlamydiales	0	0	0	0	0	0	0	0	0	0	0	0	0	0	0	0	0	0	1	1	0	1	1	1	0	0	0	0	0	0	0	0	1	1	0	0	1
Chlamydia trachomatis E/150	Bacteria	Chlamydiae	Chlamydiales	0	0	0	0	0	0	0	0	0	0	0	0	0	0	0	0	0	0	1	1	0	1	1	1	0	0	0	0	0	0	0	0	1	1	0	0	1
Chlamydia trachomatis G/9768	Bacteria	Chlamydiae	Chlamydiales	0	0	0	0	0	0	0	0	0	0	0	0	0	0	0	0	0	0	1	1	0	1	1	1	0	0	0	0	0	0	0	0	1	1	0	0	1
Chlamydia trachomatis G/11074	Bacteria	Chlamydiae	Chlamydiales	0	0	0	0	0	0	0	0	0	0	0	0	0	0	0	0	0	0	1	1	0	1	1	1	0	0	0	0	0	0	0	0	1	1	0	0	1
Chlamydia trachomatis E/11023	Bacteria	Chlamydiae	Chlamydiales	0	0	0	0	0	0	0	0	0	0	0	0	0	0	0	0	0	0	1	1	0	1	1	1	0	0	0	0	0	0	0	0	1	1	0	0	1
Chlamydia trachomatis G/9301	Bacteria	Chlamydiae	Chlamydiales	0	0	0	0	0	0	0	0	0	0	0	0	0	0	0	0	0	0	1	1	0	1	1	1	0	0	0	0	0	0	0	0	1	1	0	0	1
Chlamydia trachomatis Sweden2	Bacteria	Chlamydiae	Chlamydiales	0	0	0	0	0	0	0	0	0	0	0	0	0	0	0	0	0	0	1	1	0	1	1	1	0	0	0	0	0	0	0	0	1	1	0	0	1
Chlamydia trachomatis L2c	Bacteria	Chlamydiae	Chlamydiales	0	0	0	0	0	0	0	0	0	0	0	0	0	0	0	0	0	0	1	1	0	1	1	1	0	0	0	0	0	0	0	0	1	1	0	0	1
Chlamydia trachomatis A2497	Bacteria	Chlamydiae	Chlamydiales	0	0	0	0	0	0	0	0	0	0	0	0	0	0	0	0	0	0	1	1	0	1	1	1	0	0	0	0	0	0	0	0	1	1	0	0	1
Chlamydia trachomatis E/SW3 complete genome.	Bacteria	Chlamydiae	Chlamydiales	0	0	0	0	0	0	0	0	0	0	0	0	0	0	0	0	0	0	1	1	0	1	1	1	0	0	0	0	0	0	0	0	1	1	0	0	1
Chlamydia trachomatis F/SW4 complete genome.	Bacteria	Chlamydiae	Chlamydiales	0	0	0	0	0	0	0	0	0	0	0	0	0	0	0	0	0	0	1	1	0	1	1	1	0	0	0	0	0	0	0	0	1	1	0	0	1
Chlamydia trachomatis E/Bour complete genome.	Bacteria	Chlamydiae	Chlamydiales	0	0	0	0	0	0	0	0	0	0	0	0	0	0	0	0	0	0	1	1	0	1	1	1	0	0	0	0	0	0	0	0	1	1	0	0	1
Chlamydia trachomatis Ia/SotonIa3 complete genome.	Bacteria	Chlamydiae	Chlamydiales	0	0	0	0	0	0	0	0	0	0	0	0	0	0	0	0	0	0	1	1	0	1	1	1	0	0	0	0	0	0	0	0	1	1	0	0	1
Chlamydia trachomatis L1/440/LN complete genome.	Bacteria	Chlamydiae	Chlamydiales	0	0	0	0	0	0	0	0	0	0	0	0	0	0	0	0	0	0	1	1	0	1	1	1	0	0	0	0	0	0	0	0	1	1	0	0	1
Chlamydia trachomatis L1/115 complete genome.	Bacteria	Chlamydiae	Chlamydiales	0	0	0	0	0	0	0	0	0	0	0	0	0	0	0	0	0	0	1	1	0	1	1	1	0	0	0	0	0	0	0	0	1	1	0	0	1
Chlamydia trachomatis L2b/UCH-2 complete genome.	Bacteria	Chlamydiae	Chlamydiales	0	0	0	0	0	0	0	0	0	0	0	0	0	0	0	0	0	0	1	1	0	1	1	1	0	0	0	0	0	0	0	0	1	1	0	0	1
Chlamydia trachomatis L2b/795 complete genome.	Bacteria	Chlamydiae	Chlamydiales	0	0	0	0	0	0	0	0	0	0	0	0	0	0	0	0	0	0	1	1	0	1	1	1	0	0	0	0	0	0	0	0	1	1	0	0	1
Chlamydia trachomatis L2/434/Bu(i)	Bacteria	Chlamydiae	Chlamydiales	0	0	0	0	0	0	0	0	0	0	0	0	0	0	0	0	0	0	1	1	0	1	1	1	0	0	0	0	0	0	0	0	1	1	0	0	1
Chlamydia trachomatis L2/434/Bu(f)	Bacteria	Chlamydiae	Chlamydiales	0	0	0	0	0	0	0	0	0	0	0	0	0	0	0	0	0	0	1	1	0	1	1	1	0	0	0	0	0	0	0	0	1	1	0	0	1
Chlamydia trachomatis RC-F(s)/852	Bacteria	Chlamydiae	Chlamydiales	0	0	0	0	0	0	0	0	0	0	0	0	0	0	0	0	0	0	1	1	0	1	1	1	0	0	0	0	0	0	0	0	1	1	0	0	1
Chlamydia trachomatis RC-J/943	Bacteria	Chlamydiae	Chlamydiales	0	0	0	0	0	0	0	0	0	0	0	0	0	0	0	0	0	0	1	1	0	1	1	1	0	0	0	0	0	0	0	0	1	1	0	0	1
Chlamydia trachomatis RC-J/953	Bacteria	Chlamydiae	Chlamydiales	0	0	0	0	0	0	0	0	0	0	0	0	0	0	0	0	0	0	1	1	0	1	1	1	0	0	0	0	0	0	0	0	1	1	0	0	1
Chlamydia trachomatis RC-L2(s)/3	Bacteria	Chlamydiae	Chlamydiales	0	0	0	0	0	0	0	0	0	0	0	0	0	0	0	0	0	0	1	1	0	1	1	1	0	0	0	0	0	0	0	0	1	1	0	0	1
Chlamydia trachomatis RC-F(s)/342	Bacteria	Chlamydiae	Chlamydiales	0	0	0	0	0	0	0	0	0	0	0	0	0	0	0	0	0	0	1	1	0	1	1	1	0	0	0	0	0	0	0	0	1	1	0	0	1
Chlamydia trachomatis RC-J(s)/122	Bacteria	Chlamydiae	Chlamydiales	0	0	0	0	0	0	0	0	0	0	0	0	0	0	0	0	0	0	1	1	0	1	1	1	0	0	0	0	0	0	0	0	1	1	0	0	1
Chlamydia trachomatis RC-J/966	Bacteria	Chlamydiae	Chlamydiales	0	0	0	0	0	0	0	0	0	0	0	0	0	0	0	0	0	0	1	1	0	1	1	1	0	0	0	0	0	0	0	0	1	1	0	0	1
Chlamydia trachomatis J/6276tet1	Bacteria	Chlamydiae	Chlamydiales	0	0	0	0	0	0	0	0	0	0	0	0	0	0	0	0	0	0	1	1	0	1	1	1	0	0	0	0	0	0	0	0	1	1	0	0	1
Chlamydia trachomatis RC-J/971	Bacteria	Chlamydiae	Chlamydiales	0	0	0	0	0	0	0	0	0	0	0	0	0	0	0	0	0	0	1	1	0	1	1	1	0	0	0	0	0	0	0	0	1	1	0	0	1
Chlamydia trachomatis RC-L2/55	Bacteria	Chlamydiae	Chlamydiales	0	0	0	0	0	0	0	0	0	0	0	0	0	0	0	0	0	0	1	1	0	1	1	1	0	0	0	0	0	0	0	0	1	1	0	0	1
Chlamydia trachomatis C/TW-3	Bacteria	Chlamydiae	Chlamydiales	0	0	0	0	0	0	0	0	0	0	0	0	0	0	0	0	0	0	1	1	0	1	1	1	0	0	0	0	0	0	0	0	1	1	0	0	1
Chlamydia trachomatis strain F/6-94	Bacteria	Chlamydiae	Chlamydiales	0	0	0	0	0	0	0	0	0	0	0	0	0	0	0	0	0	0	1	1	0	1	1	1	0	0	0	0	0	0	0	0	1	1	0	0	1
Chlamydia trachomatis strain D/13-96	Bacteria	Chlamydiae	Chlamydiales	0	0	0	0	0	0	0	0	0	0	0	0	0	0	0	0	0	0	1	1	0	1	1	1	0	0	0	0	0	0	0	0	1	1	0	0	1
Chlamydia trachomatis strain J/31-98	Bacteria	Chlamydiae	Chlamydiales	0	0	0	0	0	0	0	0	0	0	0	0	0	0	0	0	0	0	1	1	0	1	1	1	0	0	0	0	0	0	0	0	1	1	0	0	1
Chlamydia trachomatis strain E-160	Bacteria	Chlamydiae	Chlamydiales	0	0	0	0	0	0	0	0	0	0	0	0	0	0	0	0	0	0	1	1	0	1	1	1	0	0	0	0	0	0	0	0	1	1	0	0	1
Chlamydia trachomatis strain E-547	Bacteria	Chlamydiae	Chlamydiales	0	0	0	0	0	0	0	0	0	0	0	0	0	0	0	0	0	0	1	1	0	1	1	1	0	0	0	0	0	0	0	0	1	1	0	0	1
Chlamydia trachomatis strain E-8873	Bacteria	Chlamydiae	Chlamydiales	0	0	0	0	0	0	0	0	0	0	0	0	0	0	0	0	0	0	1	1	0	1	1	1	0	0	0	0	0	0	0	0	1	1	0	0	1
Chromobacterium vaccinii strain 21-1	Bacteria	Proteobacteria	Betaproteobacteria	0	0	0	0	1	0	0	0	0	0	0	0	0	0	0	0	0	0	1	0	0	1	1	1	1	1	1	0	0	1	0	1	1	1	0	0	1
Chromobacterium violaceum ATCC 12472	Bacteria	Proteobacteria	Betaproteobacteria	0	0	1	0	0	1	0	0	0	0	0	0	0	0	0	0	0	0	1	0	0	1	1	1	1	1	1	0	0	1	0	1	1	1	0	0	1
Citrobacter amalonaticus Y19	Bacteria	Proteobacteria	Gammaproteobacteria	0	0	0	0	0	0	0	0	0	0	0	0	0	0	0	0	0	0	1	1	0	1	1	1	1	1	1	1	0	1	0	1	1	1	0	0	1
Citrobacter freundii CFNIH1	Bacteria	Proteobacteria	Gammaproteobacteria	0	0	0	0	0	0	0	0	0	0	0	0	0	0	0	0	0	0	1	1	0	1	1	1	1	1	1	1	0	1	0	1	1	1	0	0	1
Citrobacter freundii strain CAV1741	Bacteria	Proteobacteria	Gammaproteobacteria	0	0	0	0	0	0	0	0	0	0	0	0	0	0	0	0	0	0	1	1	0	1	1	1	1	1	1	1	0	1	0	1	1	1	0	0	1
Citrobacter freundii strain P10159	Bacteria	Proteobacteria	Gammaproteobacteria	0	0	0	0	0	0	0	0	0	0	0	0	0	0	0	0	0	0	1	1	0	1	1	1	1	1	1	1	0	1	0	1	1	1	0	0	1
Citrobacter freundii strain B38	Bacteria	Proteobacteria	Gammaproteobacteria	0	0	0	0	0	0	0	0	0	0	0	0	0	0	0	0	0	0	1	1	0	1	1	1	1	1	1	1	0	1	0	1	1	1	0	0	1
Citrobacter koseri ATCC BAA-895	Bacteria	Proteobacteria	Gammaproteobacteria	0	0	0	0	0	0	0	0	0	0	0	0	0	0	0	0	0	0	1	1	0	1	1	1	1	1	1	1	0	1	0	1	1	1	0	0	1
Citrobacter rodentium ICC168	Bacteria	Proteobacteria	Gammaproteobacteria	0	0	0	0	1	0	0	0	0	0	0	0	0	0	0	0	0	0	1	1	0	1	1	1	1	1	1	1	0	1	0	1	1	1	0	0	1
Citrobacter sp. FDAARGOS_156	Bacteria	Proteobacteria	Gammaproteobacteria	0	0	0	0	0	0	0	0	0	0	0	0	0	0	0	0	0	0	1	1	0	1	1	1	1	1	1	1	0	1	0	1	1	1	0	0	1
Clostridium acetobutylicum ATCC 824 chromosome	Bacteria	Firmicutes	Clostridia	0	0	0	0	0	0	0	0	0	0	0	0	0	0	0	0	0	0	1	1	0	1	1	1	1	1	0	1	0	1	0	1	0	1	1	0	0
Clostridium acetobutylicum EA 2018	Bacteria	Firmicutes	Clostridia	0	0	0	0	0	0	0	0	0	0	0	0	0	0	0	0	0	0	1	1	0	1	1	1	1	1	0	1	0	1	0	1	0	1	1	0	0
Clostridium acidurici 9a	Bacteria	Firmicutes	Clostridia	0	1	0	0	0	0	0	0	0	0	0	0	0	0	0	0	0	0	1	1	0	1	1	1	1	1	0	1	0	1	1	1	1	1	0	0	0
Clostridium aceticum strain DSM 1496	Bacteria	Firmicutes	Clostridia	0	1	0	0	0	0	0	0	0	0	0	0	0	0	0	0	0	0	1	1	0	1	1	1	1	1	0	0	0	1	1	1	1	1	1	0	0
Clostridium autoethanogenum DSM 10061	Bacteria	Firmicutes	Clostridia	0	1	0	0	0	0	0	0	0	0	0	0	0	0	0	0	0	0	1	0	0	1	1	1	0	1	0	0	0	1	0	1	0	1	1	0	0
Clostridium beijerinckii NCIMB 8052	Bacteria	Firmicutes	Clostridia	0	0	0	0	0	0	0	0	0	0	0	0	0	0	0	0	0	0	1	1	0	1	1	1	1	1	0	1	0	1	0	1	0	1	1	0	0
Clostridium beijerinckii ATCC 35702	Bacteria	Firmicutes	Clostridia	0	0	0	0	0	0	0	0	0	0	0	0	0	0	0	0	0	0	1	1	0	1	1	1	1	1	0	1	0	1	0	1	0	1	1	0	0
Clostridium bornimense replicon M2/40_rep1	Bacteria	Firmicutes	Clostridia	0	1	0	0	0	0	0	0	0	0	0	0	0	0	0	0	0	0	1	1	0	1	1	1	1	1	0	1	0	1	0	1	0	1	1	0	0
Clostridium botulinum A str. Hall chromosome	Bacteria	Firmicutes	Clostridia	0	0	0	0	0	0	0	0	0	0	1	0	0	0	0	0	0	0	1	1	0	1	1	1	1	1	0	1	0	1	0	1	0	1	1	0	0
Clostridium botulinum B1 str. Okra	Bacteria	Firmicutes	Clostridia	0	1	0	0	0	0	0	0	0	0	0	0	1	0	0	0	0	0	1	1	0	1	1	1	1	1	0	1	0	1	0	1	0	1	1	0	0
Clostridium botulinum A3 str. Loch Maree	Bacteria	Firmicutes	Clostridia	0	1	0	0	0	0	0	0	0	0	0	0	0	0	0	0	0	0	1	1	0	1	1	1	1	1	0	1	0	1	0	1	0	1	1	0	0
Clostridium botulinum E3 str. Alaska E43	Bacteria	Firmicutes	Clostridia	0	0	0	0	0	0	0	0	0	0	0	0	0	0	0	0	0	0	1	1	0	1	1	1	1	1	0	1	0	1	0	1	0	1	1	0	0
Clostridium botulinum A2 str. Kyoto	Bacteria	Firmicutes	Clostridia	0	0	0	0	0	0	0	0	0	0	0	0	0	0	0	0	0	0	1	1	0	1	1	1	1	1	0	1	0	1	0	1	0	1	1	0	0
Clostridium botulinum F str. 230613	Bacteria	Firmicutes	Clostridia	0	0	0	0	0	0	0	0	0	0	1	0	0	0	0	0	0	0	1	1	0	1	1	1	1	1	0	1	0	1	0	0	0	1	1	0	0
Clostridium botulinum BKT015925	Bacteria	Firmicutes	Clostridia	0	1	0	0	0	0	0	0	0	0	0	0	0	0	0	0	0	0	1	1	0	1	1	1	1	1	0	1	0	1	0	1	0	1	1	0	0
Clostridium botulinum H04402 065	Bacteria	Firmicutes	Clostridia	0	0	0	0	0	0	0	0	0	0	1	0	0	0	0	0	0	0	1	1	0	1	1	1	1	1	0	1	0	1	0	1	0	1	1	0	0
Clostridium botulinum B str. Eklund 17B(NRP)	Bacteria	Firmicutes	Clostridia	0	0	0	0	0	0	0	0	0	0	0	0	0	0	0	0	0	0	1	1	0	1	1	1	1	1	0	1	0	1	0	1	0	1	1	0	0
Clostridium butyricum strain KNU-L09 chromosome 1	Bacteria	Firmicutes	Clostridia	0	0	0	0	0	0	0	0	0	0	0	0	0	0	0	0	0	0	1	1	0	1	1	1	1	1	0	1	0	1	0	1	0	1	1	0	0
Clostridium butyricum strain TOA chromosome 1	Bacteria	Firmicutes	Clostridia	0	1	0	0	0	0	0	0	0	0	0	0	0	0	0	0	0	0	1	1	0	1	1	1	1	1	0	1	0	1	0	1	0	1	1	0	0
Clostridium cellulovorans 743B	Bacteria	Firmicutes	Clostridia	0	0	0	0	0	0	0	0	0	0	0	0	0	0	0	0	0	0	1	1	0	1	1	1	1	1	0	0	0	1	0	1	0	1	1	0	0
Clostridium cellulolyticum H10	Bacteria	Firmicutes	Clostridia	0	0	1	0	0	0	0	0	1	0	0	0	0	0	0	0	0	1	1	1	0	1	1	1	0	1	0	0	0	1	0	1	1	1	1	0	0
Clostridium cellulosi genome assembly DG5	Bacteria	Firmicutes	Clostridia	0	0	1	0	0	0	0	0	0	0	1	0	0	0	0	0	0	1	0	1	0	1	1	1	0	1	0	0	0	1	0	1	1	1	1	0	0
Clostridium clariflavum DSM 19732	Bacteria	Firmicutes	Clostridia	0	1	0	0	0	0	0	0	0	0	0	0	0	0	0	0	0	0	1	1	0	1	1	1	0	1	0	0	0	1	0	1	1	1	1	0	0
Peptoclostridium difficile 630	Bacteria	Firmicutes	Clostridia	0	1	0	0	0	0	0	0	0	0	0	0	0	0	0	0	0	0	1	1	0	1	1	1	1	1	0	1	0	1	0	1	1	1	1	0	0
Clostridium difficile complete genome	Bacteria	Firmicutes	Clostridia	0	1	0	0	0	0	0	0	0	0	0	0	0	0	0	0	0	0	1	1	0	1	1	1	1	0	0	1	0	1	0	1	1	1	1	0	0
Peptoclostridium difficile strain 08ACD0030	Bacteria	Firmicutes	Clostridia	0	1	0	0	0	0	0	0	0	0	0	0	0	0	0	0	0	0	1	1	0	1	1	1	0	1	0	1	0	1	0	1	1	1	1	0	0
Clostridium formicaceticum strain ATCC 27076	Bacteria	Firmicutes	Clostridia	0	1	0	0	0	0	0	0	0	0	0	0	0	0	0	0	0	0	0	1	0	1	1	1	1	1	0	1	0	1	1	1	1	1	1	0	0
Clostridium kluyveri NBRC 12016 DNA	Bacteria	Firmicutes	Clostridia	0	1	0	0	0	0	0	0	0	0	0	0	0	0	0	0	0	0	1	1	0	1	1	1	1	1	0	1	0	1	0	1	0	1	1	0	0
Clostridium kluyveri DSM 555	Bacteria	Firmicutes	Clostridia	0	1	0	0	0	0	0	0	0	0	0	0	0	0	0	0	0	0	1	1	0	1	1	1	1	1	0	1	0	1	0	1	0	1	1	0	0
Clostridium lentocellum DSM 5427	Bacteria	Firmicutes	Clostridia	0	0	0	0	0	0	0	0	0	0	0	0	0	0	0	0	0	0	1	1	0	1	0	1	1	1	0	1	0	1	1	1	0	1	1	0	0
Clostridium ljungdahlii DSM 13528	Bacteria	Firmicutes	Clostridia	0	0	0	0	0	0	0	0	0	0	0	0	0	0	0	0	0	0	1	1	0	1	1	1	1	1	0	0	0	1	0	1	0	1	1	0	0
Clavibacter michiganensis subsp. michiganensis NCPPB 382 complete genome.	Bacteria	Actinobacteria	Micrococcales	0	0	0	0	0	0	0	0	0	0	0	0	0	0	0	0	0	1	1	1	0	1	0	1	1	1	0	0	0	1	0	1	1	1	0	1	0
Clavibacter michiganensis subsp. sepedonicus complete genome.	Bacteria	Actinobacteria	Micrococcales	0	0	0	0	0	0	0	0	0	0	0	0	0	0	0	0	0	1	1	1	0	1	0	1	1	1	0	0	0	1	0	1	1	1	0	1	0
Clavibacter michiganensis subsp. insidiosus strain R1-1	Bacteria	Actinobacteria	Micrococcales	0	0	0	0	0	0	0	0	0	0	0	0	0	0	0	0	0	1	1	1	0	1	0	1	1	1	0	0	0	1	0	1	1	1	0	1	0
Clavibacter michiganensis strain PF008	Bacteria	Actinobacteria	Micrococcales	0	0	0	0	0	0	0	0	0	0	0	0	0	0	0	0	0	1	1	1	0	1	0	1	1	1	0	0	0	1	0	1	1	1	0	1	0
Clostridium novyi NT	Bacteria	Firmicutes	Clostridia	0	1	0	0	0	0	0	0	0	0	0	0	0	0	0	0	0	0	1	1	0	1	1	1	1	1	0	1	0	1	0	1	0	1	1	0	0
Clostridium pasteurianum BC1	Bacteria	Firmicutes	Clostridia	0	0	0	0	0	0	0	0	0	0	0	0	0	0	0	0	0	0	1	1	0	1	1	1	1	1	0	1	0	1	0	1	0	1	1	0	0
Clostridium pasteurianum NRRL B-598	Bacteria	Firmicutes	Clostridia	0	0	0	0	0	0	0	0	0	0	0	0	0	0	0	0	0	0	1	1	0	1	1	1	1	1	0	1	0	1	0	1	0	1	1	0	0
Clostridium pasteurianum DSM 525 = ATCC 6013	Bacteria	Firmicutes	Clostridia	0	1	0	0	0	0	0	0	0	0	0	0	0	0	0	0	0	0	1	1	0	1	1	1	1	1	0	1	0	1	0	1	0	1	1	0	0
Clostridium pasteurianum DSM 525 = ATCC 6013	Bacteria	Firmicutes	Clostridia	0	1	0	0	0	0	0	0	0	0	0	0	0	0	0	0	0	0	1	1	0	1	1	1	1	1	0	1	0	1	0	1	0	1	1	0	0
Clostridium pasteurianum strain M150B	Bacteria	Firmicutes	Clostridia	0	1	0	0	0	0	0	0	0	0	0	0	0	0	0	0	0	0	1	1	0	1	1	1	1	1	0	1	0	1	0	1	0	1	1	0	0
Clostridium perfringens str. 13 DNA	Bacteria	Firmicutes	Clostridia	0	0	0	0	0	0	0	0	0	0	0	0	0	0	0	0	0	0	1	1	0	1	1	1	1	1	0	1	0	1	0	1	0	1	1	0	0
Clostridium perfringens ATCC 13124	Bacteria	Firmicutes	Clostridia	0	0	0	0	0	0	0	0	0	0	0	0	0	0	0	0	0	0	1	1	0	1	1	1	1	1	0	1	0	1	0	1	0	1	1	0	0
Clostridium perfringens strain FORC_003	Bacteria	Firmicutes	Clostridia	0	0	0	0	0	0	0	0	1	0	0	0	0	0	0	0	0	0	1	1	0	1	1	1	1	1	0	1	0	1	0	1	0	1	1	0	0
Clostridium perfringens strain JP55	Bacteria	Firmicutes	Clostridia	0	0	0	0	0	0	0	0	0	0	0	0	0	0	0	0	0	0	1	1	0	1	1	1	1	1	0	1	0	1	0	1	0	1	1	0	0
Clostridium perfringens strain JP838	Bacteria	Firmicutes	Clostridia	0	0	0	0	0	0	0	0	0	0	0	0	0	0	0	0	0	0	1	1	0	1	1	1	1	1	0	1	0	1	0	1	0	1	1	0	0
Clostridium perfringens strain FORC_025	Bacteria	Firmicutes	Clostridia	0	0	0	0	0	0	0	0	0	0	0	0	0	0	0	0	0	0	1	1	0	1	1	1	1	1	0	1	0	1	0	1	0	1	1	0	0
Cloacibacillus porcorum strain CL-84	Bacteria	Synergistetes	Synergistia	0	0	1	0	0	0	0	0	0	0	0	0	0	0	0	0	0	0	1	0	0	1	1	1	1	0	0	0	0	0	0	1	1	1	0	0	0
Clostridium saccharobutylicum DSM 13864	Bacteria	Firmicutes	Clostridia	0	1	0	0	0	0	0	0	0	0	0	0	0	0	0	0	0	0	1	1	0	1	1	1	1	1	0	1	0	1	0	1	0	1	1	0	0
Clostridium saccharoperbutylacetonicum N1-4(HMT)	Bacteria	Firmicutes	Clostridia	0	1	0	0	0	0	0	0	0	0	0	0	0	0	0	0	0	0	1	1	0	1	1	1	1	1	0	0	0	1	0	1	0	1	1	0	0
Clostridium saccharolyticum WM1	Bacteria	Firmicutes	Clostridia	0	0	0	0	0	0	0	0	0	0	0	0	0	0	0	0	0	1	1	1	0	1	1	1	1	1	0	0	0	1	1	1	0	1	1	0	0
Clostridium scatologenes strain ATCC 25775	Bacteria	Firmicutes	Clostridia	0	1	0	0	0	0	0	0	0	0	1	0	0	0	0	0	0	0	1	1	0	1	1	1	1	1	0	0	0	1	0	1	0	1	1	0	0
Clostridium sp. SY8519 DNA	Bacteria	Firmicutes	Clostridia	0	0	0	0	1	0	0	0	0	0	0	0	0	0	0	0	0	0	1	1	0	1	1	1	0	1	0	0	0	1	1	1	0	1	1	0	0
Clostridium sporogenes strain NCIMB 10696	Bacteria	Firmicutes	Clostridia	0	0	0	0	0	0	0	0	0	0	0	0	0	0	0	0	0	0	1	1	0	1	1	1	1	1	0	1	0	1	0	1	0	1	1	0	0
Clostridium sporogenes strain DSM 795	Bacteria	Firmicutes	Clostridia	0	0	0	0	0	0	0	0	0	0	0	0	0	0	0	0	0	0	1	1	0	1	1	1	1	1	0	1	0	1	0	1	0	1	1	0	0
Clostridium sp. BNL1100	Bacteria	Firmicutes	Clostridia	0	0	1	0	0	0	0	0	0	0	0	0	0	0	0	0	0	1	1	1	0	1	1	1	1	1	0	0	0	1	0	1	1	1	1	0	0
Clostridium stercorarium subsp. stercorarium DSM 8532	Bacteria	Firmicutes	Clostridia	0	1	0	0	0	0	0	0	0	0	0	0	1	0	0	0	0	1	1	1	0	1	1	1	0	1	0	0	0	1	0	1	1	1	1	0	0
Clostridium stercorarium subsp. stercorarium DSM 8532	Bacteria	Firmicutes	Clostridia	0	1	0	0	0	0	0	0	0	0	0	0	1	0	0	0	0	1	1	1	0	1	1	1	0	1	0	0	0	1	0	1	1	1	1	0	0
Clostridium stercorarium subsp. thermolacticum DSM 2910	Bacteria	Firmicutes	Clostridia	0	1	0	0	0	0	0	0	0	0	0	0	1	0	0	0	0	1	1	1	0	1	1	1	0	1	0	0	0	1	0	1	1	1	1	0	0
Clostridium stercorarium subsp. leptospartum DSM 9219	Bacteria	Firmicutes	Clostridia	0	1	0	0	0	0	0	0	0	0	0	0	1	0	0	0	0	1	1	1	0	1	1	1	0	1	0	0	0	1	0	1	1	1	1	0	0
Clostridium taeniosporum strain 1/k	Bacteria	Firmicutes	Clostridia	0	0	0	0	0	0	0	0	0	0	0	0	0	0	0	0	0	0	1	1	0	1	1	1	1	1	0	1	0	0	0	1	0	1	1	0	0
Clostridium tetani E88	Bacteria	Firmicutes	Clostridia	0	1	0	0	0	0	0	0	0	0	0	0	0	0	0	0	0	0	1	1	0	1	1	1	1	1	0	0	0	1	0	1	0	1	1	0	0
Clostridium tetani 12124569 main chromosome	Bacteria	Firmicutes	Clostridia	0	1	0	0	0	0	0	0	0	0	0	0	0	0	0	0	0	0	0	1	0	1	1	1	0	1	0	0	0	1	0	1	0	1	1	0	0
Clostridium tyrobutyricum strain KCTC 5387	Bacteria	Firmicutes	Clostridia	0	1	0	0	0	0	0	0	0	0	0	0	0	0	0	0	0	0	1	1	0	1	1	1	1	1	0	1	0	1	0	1	0	1	1	0	0
Coraliomargarita akajimensis DSM 45221	Bacteria	Verrucomicrobia	Opitutae	0	0	0	0	0	0	0	0	0	0	0	0	0	0	0	0	0	0	1	1	0	0	1	1	1	0	0	0	0	1	0	1	1	1	0	0	1
Collimonas arenae strain Cal35	Bacteria	Proteobacteria	Betaproteobacteria	0	0	0	0	0	0	0	0	0	0	0	0	0	0	0	0	0	0	1	0	0	1	1	1	1	1	1	0	0	1	0	1	1	1	1	0	0
Collimonas arenae strain Ter10	Bacteria	Proteobacteria	Betaproteobacteria	0	0	0	0	0	0	0	0	0	0	0	0	0	0	0	0	0	0	1	0	0	1	1	1	1	1	0	0	0	1	0	1	1	0	1	0	0
Collimonas arenae strain Ter282	Bacteria	Proteobacteria	Betaproteobacteria	0	0	0	0	0	0	0	0	0	0	0	0	0	0	0	0	0	0	1	0	0	1	1	1	0	1	1	0	0	1	0	1	1	1	1	0	0
Corynebacterium argentoratense DSM 44202	Bacteria	Actinobacteria	Corynebacteriales	0	0	0	0	0	0	0	0	0	0	0	0	0	0	0	0	0	0	1	1	0	1	0	1	0	1	0	0	0	1	0	1	1	1	0	1	0
Corynebacterium atypicum strain R2070	Bacteria	Actinobacteria	Corynebacteriales	0	0	0	0	1	0	0	0	0	0	0	0	0	0	0	0	0	0	1	1	0	1	0	1	0	1	0	0	0	1	0	1	0	1	0	1	0
Corynebacterium aurimucosum ATCC 700975	Bacteria	Actinobacteria	Corynebacteriales	0	0	0	0	1	0	0	0	0	0	0	0	0	0	0	0	0	0	1	1	0	1	0	1	0	1	0	0	0	1	0	1	1	1	0	1	0
Comamonadaceae bacterium A1 DNA	Bacteria	Proteobacteria	Betaproteobacteria	0	0	1	0	1	0	0	0	0	0	0	0	0	0	0	0	0	0	1	0	0	1	1	1	1	1	1	0	0	1	0	1	1	1	1	0	0
Comamonadaceae bacterium B1 DNA	Bacteria	Proteobacteria	Betaproteobacteria	0	0	0	0	1	0	0	0	0	0	0	0	0	0	0	0	0	0	1	0	0	1	1	1	1	0	1	0	0	0	0	1	1	1	1	0	0
Coriobacteriaceae bacterium 68-1-3	Bacteria	Actinobacteria	Coriobacteriia	0	0	1	0	0	0	0	0	0	0	0	0	0	0	0	0	0	0	1	1	0	1	1	1	1	1	0	0	0	1	0	1	1	1	0	0	0
Coxiella burnetii RSA 493 chromosome	Bacteria	Proteobacteria	Gammaproteobacteria	0	0	0	0	0	0	0	0	0	0	0	0	0	0	0	0	0	1	1	1	0	1	1	1	1	1	1	0	0	0	0	1	1	1	1	0	0
Coxiella burnetii Dugway 5J108-111	Bacteria	Proteobacteria	Gammaproteobacteria	0	0	0	0	0	1	0	0	0	0	0	0	0	0	0	0	0	1	1	1	0	1	1	1	1	1	1	0	0	0	0	1	1	1	1	0	0
Coxiella burnetii RSA 331	Bacteria	Proteobacteria	Gammaproteobacteria	0	0	0	0	0	0	0	0	0	0	0	0	0	0	0	0	0	1	1	1	0	1	1	1	1	1	1	0	0	0	0	1	1	1	1	0	0
Coxiella burnetii CbuG_Q212	Bacteria	Proteobacteria	Gammaproteobacteria	0	0	0	0	0	1	0	0	0	0	0	0	0	0	0	0	0	1	1	1	0	1	1	1	1	1	1	0	0	0	0	1	1	1	1	0	0
Coxiella burnetii CbuK_Q154	Bacteria	Proteobacteria	Gammaproteobacteria	0	0	0	0	0	1	0	0	0	0	0	0	0	0	0	0	0	1	1	1	0	1	1	1	1	1	1	0	0	0	0	1	1	1	1	0	0
Coxiella burnetii Z3055 complete genome.	Bacteria	Proteobacteria	Gammaproteobacteria	0	0	0	0	0	1	0	0	0	0	0	0	0	0	0	0	0	1	1	1	0	1	1	1	1	1	1	0	0	0	0	1	1	1	1	0	0
Coxiella burnetii strain 3262	Bacteria	Proteobacteria	Gammaproteobacteria	0	0	0	0	0	1	0	0	0	0	0	0	0	0	0	0	0	1	1	1	0	1	1	1	1	1	1	0	0	0	0	1	1	1	1	0	0
Corynebacterium casei LMG S-19264	Bacteria	Actinobacteria	Corynebacteriales	0	0	0	0	1	0	0	0	0	0	0	0	0	0	0	0	0	0	1	1	0	1	0	1	0	1	0	0	0	1	0	1	1	1	0	1	0
Corynebacterium camporealensis strain DSM 44610	Bacteria	Actinobacteria	Corynebacteriales	0	0	0	0	0	0	0	0	0	0	0	0	0	0	0	0	0	0	1	1	0	1	0	1	0	1	0	0	0	1	0	1	1	1	0	1	0
Corynebacterium callunae DSM 20147	Bacteria	Actinobacteria	Corynebacteriales	0	0	0	0	0	0	0	0	0	0	0	0	0	0	0	0	0	0	1	1	0	1	0	1	0	1	0	0	0	1	0	1	1	1	0	1	0
Corallococcus coralloides DSM 2259	Bacteria	Proteobacteria	Deltaproteobacteria	0	0	0	0	0	0	0	0	0	0	0	0	0	0	0	0	0	0	1	1	0	1	1	1	1	1	0	0	0	1	0	1	1	1	1	0	0
Corynebacterium deserti GIMN1.010	Bacteria	Actinobacteria	Corynebacteriales	0	0	0	0	1	0	0	0	0	0	0	0	0	0	0	0	0	0	1	1	0	1	0	1	1	1	0	0	0	1	0	1	1	1	0	1	0
Corynebacterium diphtheriae NCTC 13129	Bacteria	Actinobacteria	Corynebacteriales	0	0	0	0	1	0	0	0	0	0	0	0	0	0	0	0	0	0	1	1	0	1	0	1	0	1	0	0	0	1	0	1	1	1	0	1	0
Corynebacterium diphtheriae 31A	Bacteria	Actinobacteria	Corynebacteriales	0	0	0	0	0	0	0	0	0	0	0	0	0	0	0	0	0	0	1	1	0	1	0	1	0	1	0	0	0	1	0	1	1	1	0	1	0
Corynebacterium diphtheriae 241	Bacteria	Actinobacteria	Corynebacteriales	0	0	0	0	1	0	0	0	0	0	0	0	0	0	0	0	0	0	1	1	0	1	0	1	0	1	0	0	0	1	0	1	1	1	0	1	0
Corynebacterium diphtheriae INCA 402	Bacteria	Actinobacteria	Corynebacteriales	0	0	0	0	1	0	0	0	0	0	0	0	0	0	0	0	0	0	1	1	0	1	0	1	0	1	0	0	0	1	0	1	1	1	0	1	0
Corynebacterium diphtheriae BH8	Bacteria	Actinobacteria	Corynebacteriales	0	0	0	0	0	0	0	0	0	0	0	0	0	0	0	0	0	0	1	1	0	1	0	1	0	1	0	0	0	1	0	1	1	1	0	1	0
Corynebacterium diphtheriae HC03	Bacteria	Actinobacteria	Corynebacteriales	0	0	0	0	1	0	0	0	0	0	0	0	0	0	0	0	0	0	1	1	0	1	0	1	0	1	0	0	0	1	0	1	1	1	0	1	0
Corynebacterium diphtheriae HC02	Bacteria	Actinobacteria	Corynebacteriales	0	0	0	0	0	0	0	0	0	0	0	0	0	0	0	0	0	0	1	1	0	1	0	1	0	1	0	0	0	1	0	1	1	1	0	1	0
Corynebacterium diphtheriae C7 (beta)	Bacteria	Actinobacteria	Corynebacteriales	0	0	0	0	0	0	0	0	0	0	0	0	0	0	0	0	0	0	1	1	0	1	0	1	0	1	0	0	0	1	0	1	1	1	0	1	0
Corynebacterium diphtheriae HC04	Bacteria	Actinobacteria	Corynebacteriales	0	0	0	0	1	0	0	0	0	0	0	0	0	0	0	0	0	0	1	1	0	1	0	1	0	1	0	0	0	1	0	1	1	1	0	1	0
Corynebacterium diphtheriae CDCE 8392	Bacteria	Actinobacteria	Corynebacteriales	0	0	0	0	1	0	0	0	0	0	0	0	0	0	0	0	0	0	1	1	0	1	0	1	0	1	0	0	0	1	0	1	1	1	0	1	0
Corynebacterium diphtheriae VA01	Bacteria	Actinobacteria	Corynebacteriales	0	0	0	0	0	0	0	0	0	0	0	0	0	0	0	0	0	0	1	1	0	1	0	1	0	1	0	0	0	1	0	1	1	1	0	1	0
Corynebacterium diphtheriae PW8	Bacteria	Actinobacteria	Corynebacteriales	0	0	0	0	1	0	0	0	0	0	0	0	0	0	0	0	0	0	1	1	0	1	0	1	0	1	0	0	0	1	0	1	1	1	0	1	0
Corynebacterium diphtheriae genome assembly NCTC11397	Bacteria	Actinobacteria	Corynebacteriales	0	0	0	0	0	0	0	0	0	0	0	0	0	0	0	0	0	0	1	1	0	1	0	1	0	1	0	0	0	1	0	1	1	1	0	1	0
Corynebacterium doosanense CAU 212 = DSM 45436	Bacteria	Actinobacteria	Corynebacteriales	0	0	0	0	0	0	0	0	0	0	0	0	0	0	0	0	0	0	1	1	0	1	0	1	0	1	0	0	0	1	0	1	1	1	0	1	0
Corynebacterium efficiens YS-314 DNA	Bacteria	Actinobacteria	Corynebacteriales	0	0	0	0	0	0	0	0	0	0	0	0	0	0	0	0	0	0	1	1	0	1	0	1	1	1	0	0	0	1	0	1	1	1	0	1	0
Coxiella-like endosymbiont strain CRt	Bacteria	Proteobacteria	Gammaproteobacteria	0	0	0	0	0	0	0	0	0	0	0	0	0	0	0	0	0	0	1	0	0	1	1	1	0	1	1	0	0	0	0	1	1	1	1	0	0
Coxiella endosymbiont of Amblyomma americanum	Bacteria	Proteobacteria	Gammaproteobacteria	0	0	0	0	0	0	0	0	0	0	0	0	0	0	0	0	0	0	1	1	0	1	1	1	0	0	0	0	0	0	0	0	0	1	0	0	0
Corynebacterium epidermidicanis strain DSM 45586	Bacteria	Actinobacteria	Corynebacteriales	0	0	0	0	0	0	0	0	0	0	0	0	0	0	0	0	0	0	1	1	0	1	0	1	0	1	0	0	0	1	0	1	1	1	0	1	0
Corynebacterium falsenii DSM 44353 strain BL 8171	Bacteria	Actinobacteria	Corynebacteriales	0	0	0	0	1	0	0	0	0	0	0	0	0	0	0	0	0	0	1	0	0	1	0	1	1	1	0	0	0	1	0	1	1	1	0	1	0
Collimonas fungivorans Ter331	Bacteria	Proteobacteria	Betaproteobacteria	0	0	0	0	0	0	0	0	0	0	0	0	0	0	0	0	0	1	1	0	0	1	1	1	1	1	1	0	0	1	0	1	1	1	1	0	0
Collimonas fungivorans strain Ter6	Bacteria	Proteobacteria	Betaproteobacteria	0	0	0	0	0	0	0	0	0	0	0	0	0	0	0	0	0	0	1	0	0	1	0	1	1	1	1	0	0	1	0	1	1	1	1	0	0
Corynebacterium glyciniphilum AJ 3170	Bacteria	Actinobacteria	Corynebacteriales	0	0	0	0	0	0	0	0	0	0	0	0	0	0	0	0	0	0	1	1	0	1	0	1	1	1	0	0	0	1	0	1	1	1	0	1	0
Corynebacterium glutamicum R DNA	Bacteria	Actinobacteria	Corynebacteriales	0	0	0	0	1	0	0	0	0	0	0	0	0	0	0	0	0	0	1	1	0	1	0	1	1	1	0	0	0	1	0	1	1	1	0	1	0
Corynebacterium glutamicum ATCC 13032 chromosome	Bacteria	Actinobacteria	Corynebacteriales	0	0	0	0	0	0	0	0	0	0	0	0	0	0	0	0	0	0	1	1	0	1	0	1	1	1	0	0	0	1	0	1	1	1	0	1	0
Corynebacterium glutamicum ATCC 13032	Bacteria	Actinobacteria	Corynebacteriales	0	0	0	0	0	0	0	0	0	0	0	0	0	0	0	0	0	0	1	1	0	1	0	1	1	1	0	0	0	1	0	1	1	1	0	1	0
Corynebacterium glutamicum K051 complete genome	Bacteria	Actinobacteria	Corynebacteriales	0	0	0	0	0	0	0	0	0	0	0	0	0	0	0	0	0	0	1	1	0	1	0	1	1	1	0	0	0	1	0	1	1	1	0	1	0
Corynebacterium glutamicum SCgG1	Bacteria	Actinobacteria	Corynebacteriales	0	0	0	0	0	0	0	0	0	0	0	0	0	0	0	0	0	0	1	1	0	1	0	1	1	1	0	0	0	1	0	1	1	1	0	1	0
Corynebacterium glutamicum SCgG2	Bacteria	Actinobacteria	Corynebacteriales	0	0	0	0	0	0	0	0	0	0	0	0	0	0	0	0	0	0	1	1	0	1	0	1	1	1	0	0	0	1	0	1	1	1	0	1	0
Corynebacterium glutamicum MB001	Bacteria	Actinobacteria	Corynebacteriales	0	0	0	0	0	0	0	0	0	0	0	0	0	0	0	0	0	0	1	1	0	1	0	1	1	1	0	0	0	1	0	1	1	1	0	1	0
Corynebacterium glutamicum strain ATCC 21831	Bacteria	Actinobacteria	Corynebacteriales	0	0	0	0	0	0	0	0	0	0	0	0	0	0	0	0	0	0	1	1	0	1	0	1	1	1	0	0	0	1	0	1	1	1	0	1	0
Corynebacterium glutamicum strain AR1	Bacteria	Actinobacteria	Corynebacteriales	0	0	0	0	0	0	0	0	0	0	0	0	0	0	0	0	0	0	1	1	0	1	0	1	1	1	0	0	0	1	0	1	1	1	0	1	0
Corynebacterium glutamicum strain B253	Bacteria	Actinobacteria	Corynebacteriales	0	0	0	0	1	0	0	0	0	0	0	0	0	0	0	0	0	0	1	1	0	1	0	1	1	1	0	0	0	1	0	1	1	1	0	1	0
Corynebacterium glutamicum strain CP	Bacteria	Actinobacteria	Corynebacteriales	0	0	0	0	0	0	0	0	0	0	0	0	0	0	0	0	0	0	1	1	0	1	0	1	1	1	0	0	0	1	0	1	1	1	0	1	0
Corynebacterium glutamicum strain USDA-ARS-USMARC-56828	Bacteria	Actinobacteria	Corynebacteriales	0	0	0	0	0	0	0	0	0	0	0	0	0	1	0	0	0	0	1	1	0	1	0	1	1	1	0	0	0	1	0	1	1	1	0	1	0
Corynebacterium glutamicum strain YI	Bacteria	Actinobacteria	Corynebacteriales	0	0	0	0	0	0	0	0	0	0	0	0	0	0	0	0	0	0	1	1	0	1	0	1	1	1	0	0	0	1	0	1	1	1	0	1	0
Corynebacterium glutamicum ZL-6	Bacteria	Actinobacteria	Corynebacteriales	0	0	0	0	0	0	0	0	0	0	0	0	0	0	0	0	0	0	1	1	0	1	0	1	1	1	0	0	0	1	0	1	1	1	0	1	0
Corynebacterium glutamicum strain ATCC 13869	Bacteria	Actinobacteria	Corynebacteriales	0	0	0	0	0	0	0	0	0	0	0	0	0	0	0	0	0	0	1	1	0	1	0	1	1	1	0	0	0	1	0	1	1	1	0	1	0
Coriobacterium glomerans PW2	Bacteria	Actinobacteria	Coriobacteriia	0	0	0	0	1	0	1	0	0	0	0	0	0	0	0	0	0	0	1	1	0	1	1	1	1	1	0	0	0	1	0	1	1	1	1	0	0
Corynebacterium halotolerans YIM 70093 = DSM 44683	Bacteria	Actinobacteria	Corynebacteriales	0	0	0	0	0	0	0	0	0	0	0	0	0	0	0	0	0	0	1	1	0	1	0	1	0	1	0	0	0	1	0	1	1	1	0	1	0
Corynebacterium humireducens NBRC 106098 = DSM 45392	Bacteria	Actinobacteria	Corynebacteriales	0	0	0	0	1	0	0	0	0	0	0	0	0	0	0	0	0	1	1	1	0	1	0	1	1	1	0	0	0	1	0	1	1	1	0	1	0
Corynebacterium imitans strain DSM 44264	Bacteria	Actinobacteria	Corynebacteriales	0	0	0	0	0	0	0	0	0	0	0	0	0	1	0	0	0	0	1	1	0	1	0	1	1	1	0	0	0	1	0	1	1	1	0	1	0
Corynebacterium jeikeium K411 complete genome.	Bacteria	Actinobacteria	Corynebacteriales	0	0	0	0	1	0	0	0	0	0	0	0	0	0	0	0	0	0	1	0	0	1	0	1	0	1	0	0	0	1	0	1	1	1	0	1	0
Corynebacterium kroppenstedtii DSM 44385	Bacteria	Actinobacteria	Corynebacteriales	0	0	0	0	0	0	0	0	0	0	0	0	0	0	0	0	0	0	1	1	0	1	0	1	0	1	0	0	0	1	0	1	1	1	0	1	0
Corynebacterium kutscheri strain DSM 20755	Bacteria	Actinobacteria	Corynebacteriales	0	0	0	0	1	0	0	0	0	0	0	0	0	0	0	0	0	0	1	1	0	1	0	1	1	1	0	0	0	1	0	1	1	1	0	1	0
Corynebacterium lactis RW2-5	Bacteria	Actinobacteria	Corynebacteriales	0	0	0	0	0	0	0	0	0	0	0	0	0	0	0	0	0	0	1	1	0	1	0	1	0	1	0	0	0	1	0	1	1	1	0	1	0
Corynebacterium marinum DSM 44953	Bacteria	Actinobacteria	Corynebacteriales	0	0	0	0	0	0	0	0	0	0	0	0	0	0	0	0	0	0	1	1	0	1	0	1	1	1	0	0	0	1	0	1	1	1	0	1	0
Corynebacterium maris DSM 45190	Bacteria	Actinobacteria	Corynebacteriales	0	0	0	0	0	0	0	0	0	0	0	0	0	0	0	0	0	0	1	1	0	1	0	1	1	1	0	0	0	1	0	1	1	1	0	1	0
Corynebacterium mustelae strain DSM 45274	Bacteria	Actinobacteria	Corynebacteriales	0	0	0	0	1	0	0	0	0	0	0	0	0	0	0	0	0	0	1	1	0	1	0	1	0	1	0	0	0	1	0	1	1	1	0	1	0
Collimonas pratensis strain Ter91	Bacteria	Proteobacteria	Betaproteobacteria	0	0	0	0	0	0	0	0	0	0	0	0	0	0	0	0	0	0	1	0	0	1	1	1	1	1	1	0	0	1	0	1	1	1	1	0	0
Coprothermobacter proteolyticus DSM 5265	Bacteria	Firmicutes	Clostridia	0	0	0	0	0	0	0	0	0	0	0	0	0	0	0	0	0	0	1	0	0	1	0	1	0	1	0	0	0	1	0	1	1	0	0	0	0
Corynebacterium pseudotuberculosis FRC41	Bacteria	Actinobacteria	Corynebacteriales	0	0	0	0	0	0	0	0	0	0	0	0	0	0	0	0	0	0	1	1	0	1	0	1	0	1	0	0	0	1	0	1	1	1	0	1	0
Corynebacterium pseudotuberculosis C231	Bacteria	Actinobacteria	Corynebacteriales	0	0	0	0	0	0	0	0	0	0	0	0	0	0	0	0	0	0	1	1	0	1	0	1	0	1	0	0	0	1	0	1	1	1	0	1	0
Corynebacterium pseudotuberculosis 1002	Bacteria	Actinobacteria	Corynebacteriales	0	0	0	0	0	0	0	0	0	0	0	0	0	0	0	0	0	0	1	1	0	1	0	1	0	1	0	0	0	1	0	1	1	1	0	1	0
Corynebacterium pseudotuberculosis I19	Bacteria	Actinobacteria	Corynebacteriales	0	0	0	0	0	0	0	0	0	0	0	0	0	0	0	0	0	0	1	1	0	1	0	1	0	1	0	0	0	1	0	1	1	1	0	1	0
Corynebacterium pseudotuberculosis PAT10	Bacteria	Actinobacteria	Corynebacteriales	0	0	0	0	0	0	0	0	0	0	0	0	0	0	0	0	0	0	1	1	0	1	0	1	0	1	0	0	0	1	0	1	1	1	0	1	0
Corynebacterium pseudotuberculosis 42/02-A	Bacteria	Actinobacteria	Corynebacteriales	0	0	0	0	0	0	0	0	0	0	0	0	0	0	0	0	0	0	1	1	0	1	0	1	0	1	0	0	0	1	0	1	1	1	0	1	0
Corynebacterium pseudotuberculosis CIP 52.97	Bacteria	Actinobacteria	Corynebacteriales	0	0	0	0	0	0	0	0	0	0	0	0	0	0	0	0	0	0	1	1	0	1	0	1	0	1	0	0	0	0	0	1	1	1	0	1	0
Corynebacterium pseudotuberculosis 1/06-A	Bacteria	Actinobacteria	Corynebacteriales	0	0	0	0	0	0	0	0	0	0	0	0	0	0	0	0	0	0	1	1	0	1	0	1	0	1	0	0	0	1	0	1	1	1	0	1	0
Corynebacterium pseudotuberculosis 3/99-5	Bacteria	Actinobacteria	Corynebacteriales	0	0	0	0	0	0	0	0	0	0	0	0	0	0	0	0	0	0	1	1	0	1	0	1	0	1	0	0	0	1	0	1	1	1	0	1	0
Corynebacterium pseudotuberculosis 316	Bacteria	Actinobacteria	Corynebacteriales	0	0	0	0	0	0	0	0	0	0	0	0	0	0	0	0	0	0	1	1	0	1	0	1	0	1	0	0	0	1	0	1	1	1	0	1	0
Corynebacterium pseudotuberculosis P54B96	Bacteria	Actinobacteria	Corynebacteriales	0	0	0	0	0	0	0	0	0	0	0	0	0	0	0	0	0	0	1	1	0	1	0	1	0	1	0	0	0	1	0	1	1	1	0	1	0
Corynebacterium pseudotuberculosis 267	Bacteria	Actinobacteria	Corynebacteriales	0	0	0	0	0	0	0	0	0	0	0	0	0	0	0	0	0	0	1	1	0	1	0	1	0	1	0	0	0	1	0	1	1	1	0	1	0
Corynebacterium pseudotuberculosis 31	Bacteria	Actinobacteria	Corynebacteriales	0	0	0	0	1	0	0	0	0	0	0	0	0	0	0	0	0	0	1	1	0	1	0	1	0	1	0	0	0	1	0	1	1	1	0	1	0
Corynebacterium pseudotuberculosis 258	Bacteria	Actinobacteria	Corynebacteriales	0	0	0	0	1	0	0	0	0	0	0	0	0	0	0	0	0	0	1	1	0	1	0	1	0	1	0	0	0	1	0	1	1	1	0	1	0
Corynebacterium pseudotuberculosis Cp162	Bacteria	Actinobacteria	Corynebacteriales	0	0	0	0	0	0	0	0	0	0	0	0	0	0	0	0	0	0	1	1	0	1	0	1	0	1	0	0	0	1	0	1	1	1	0	1	0
Corynebacterium pseudotuberculosis strain 48252	Bacteria	Actinobacteria	Corynebacteriales	0	0	0	0	0	0	0	0	0	0	0	0	0	0	0	0	0	0	1	1	0	1	0	1	0	1	0	0	0	1	0	1	1	1	0	1	0
Corynebacterium pseudotuberculosis strain CS_10	Bacteria	Actinobacteria	Corynebacteriales	0	0	0	0	0	0	0	0	0	0	0	0	0	0	0	0	0	0	1	1	0	1	0	1	0	1	0	0	0	1	0	1	1	1	0	1	0
Corynebacterium pseudotuberculosis strain Ft_2193/67	Bacteria	Actinobacteria	Corynebacteriales	0	0	0	0	0	0	0	0	0	0	0	0	0	0	0	0	0	0	1	1	0	1	0	1	0	1	0	0	0	1	0	1	1	1	0	1	0
Corynebacterium pseudotuberculosis strain VD57	Bacteria	Actinobacteria	Corynebacteriales	0	0	0	0	0	0	0	0	0	0	0	0	0	0	0	0	0	0	1	1	0	1	0	1	0	1	0	0	0	1	0	1	1	1	0	1	0
Corynebacterium pseudotuberculosis strain 226	Bacteria	Actinobacteria	Corynebacteriales	0	0	0	0	0	0	0	0	0	0	0	0	0	0	0	0	0	0	1	1	0	1	0	1	0	1	0	0	0	1	0	1	1	1	0	1	0
Corynebacterium pseudotuberculosis strain 12C	Bacteria	Actinobacteria	Corynebacteriales	0	0	0	0	0	0	0	0	0	0	0	0	0	0	0	0	0	0	1	1	0	1	0	1	0	1	0	0	0	1	0	1	1	1	0	1	0
Corynebacterium pseudotuberculosis strain 29156	Bacteria	Actinobacteria	Corynebacteriales	0	0	0	0	0	0	0	0	0	0	0	0	0	0	0	0	0	0	1	1	0	1	0	1	0	1	0	0	0	1	0	1	1	1	0	1	0
Corynebacterium pseudotuberculosis strain 262	Bacteria	Actinobacteria	Corynebacteriales	0	0	0	0	0	0	0	0	0	0	0	0	0	0	0	0	0	0	1	1	0	1	0	1	0	1	0	0	0	1	0	1	1	1	0	1	0
Corynebacterium pseudotuberculosis strain E19	Bacteria	Actinobacteria	Corynebacteriales	0	0	0	0	1	0	0	0	0	0	0	0	0	0	0	0	0	0	1	1	0	1	0	1	0	1	0	0	0	1	0	1	1	1	0	1	0
Corynebacterium pseudotuberculosis strain PO269-5	Bacteria	Actinobacteria	Corynebacteriales	0	0	0	0	0	0	0	0	0	0	0	0	0	0	0	0	0	0	1	1	0	1	0	1	0	1	0	0	0	1	0	1	1	1	0	1	0
Corynebacterium pseudotuberculosis strain 1002B	Bacteria	Actinobacteria	Corynebacteriales	0	0	0	0	0	0	0	0	0	0	0	0	0	0	0	0	0	0	1	1	0	1	0	1	0	1	0	0	0	1	0	1	1	1	0	1	0
Corynebacterium pseudotuberculosis strain N1	Bacteria	Actinobacteria	Corynebacteriales	0	0	0	0	0	0	0	0	0	0	0	0	0	0	0	0	0	0	1	1	0	1	0	1	0	1	0	0	0	1	0	1	1	1	0	1	0
Corynebacterium pseudotuberculosis strain PA01	Bacteria	Actinobacteria	Corynebacteriales	0	0	0	0	0	0	0	0	0	0	0	0	0	0	0	0	0	0	1	1	0	1	0	1	0	1	0	0	0	1	0	1	1	1	0	1	0
Corynebacterium pseudotuberculosis strain MEX25	Bacteria	Actinobacteria	Corynebacteriales	0	0	0	0	0	0	0	0	0	0	0	0	0	0	0	0	0	0	1	1	0	1	0	1	0	1	0	0	0	1	0	1	1	1	0	1	0
Corynebacterium pseudotuberculosis strain PO222/4-1	Bacteria	Actinobacteria	Corynebacteriales	0	0	0	0	0	0	0	0	0	0	0	0	0	0	0	0	0	0	1	1	0	1	0	1	0	1	0	0	0	1	0	1	1	1	0	1	0
Corynebacterium pseudotuberculosis strain E56	Bacteria	Actinobacteria	Corynebacteriales	0	0	0	0	0	0	0	0	0	0	0	0	0	0	0	0	0	0	1	1	0	1	0	1	0	1	0	0	0	1	0	1	1	1	0	1	0
Corynebacterium pseudotuberculosis strain MB11	Bacteria	Actinobacteria	Corynebacteriales	0	0	0	0	1	0	0	0	0	0	0	0	0	0	0	0	0	0	1	1	0	1	0	1	0	0	0	0	0	1	0	1	1	0	0	1	0
Corynebacterium pseudotuberculosis strain MB14	Bacteria	Actinobacteria	Corynebacteriales	0	0	0	0	1	0	0	0	0	0	0	0	0	0	0	0	0	0	1	1	0	1	0	1	0	1	0	0	0	1	0	1	1	0	0	1	0
Corynebacterium pseudotuberculosis strain MB30	Bacteria	Actinobacteria	Corynebacteriales	0	0	0	0	1	0	0	0	0	0	0	0	0	0	0	0	0	0	1	1	0	1	0	1	0	1	0	0	0	1	0	1	1	1	0	1	0
Corynebacterium pseudotuberculosis strain MB66	Bacteria	Actinobacteria	Corynebacteriales	0	0	0	0	1	0	0	0	0	0	0	0	0	0	0	0	0	0	1	1	0	1	0	1	0	1	0	0	0	1	0	1	1	0	0	1	0
Corynebacterium pseudotuberculosis strain E55	Bacteria	Actinobacteria	Corynebacteriales	0	0	0	0	0	0	0	0	0	0	0	0	0	0	0	0	0	0	1	1	0	1	0	1	0	1	0	0	0	1	0	1	1	1	0	1	0
Corynebacterium pseudotuberculosis strain MEX9	Bacteria	Actinobacteria	Corynebacteriales	0	0	0	0	0	0	0	0	0	0	0	0	0	0	0	0	0	0	1	1	0	1	0	1	0	1	0	0	0	1	0	1	1	1	0	1	0
Corynebacterium pseudotuberculosis strain PA02	Bacteria	Actinobacteria	Corynebacteriales	0	0	0	0	0	0	0	0	0	0	0	0	0	0	0	0	0	0	1	1	0	1	0	1	0	1	0	0	0	1	0	1	1	1	0	1	0
Corynebacterium pseudotuberculosis strain T1	Bacteria	Actinobacteria	Corynebacteriales	0	0	0	0	0	0	0	0	0	0	0	0	0	0	0	0	0	0	1	1	0	1	0	1	0	1	0	0	0	1	0	1	1	1	0	1	0
Corynebacterium pseudotuberculosis strain Cp13	Bacteria	Actinobacteria	Corynebacteriales	0	0	0	0	0	0	0	0	0	0	0	0	0	0	0	0	0	0	1	1	0	1	0	1	0	1	0	0	0	1	0	1	1	1	0	1	0
Corynebacterium pseudotuberculosis strain MEX29	Bacteria	Actinobacteria	Corynebacteriales	0	0	0	0	0	0	0	0	0	0	0	0	0	0	0	0	0	0	1	1	0	1	0	1	0	1	0	0	0	1	0	1	1	1	0	1	0
Colwellia psychrerythraea 34H	Bacteria	Proteobacteria	Gammaproteobacteria	0	0	0	0	0	0	0	0	0	0	0	0	0	0	0	0	0	0	1	1	0	1	1	1	1	1	1	0	0	1	0	1	1	1	0	0	1
Corynebacterium resistens DSM 45100	Bacteria	Actinobacteria	Corynebacteriales	0	0	0	0	1	0	0	0	0	0	0	0	0	0	0	0	0	0	1	0	0	1	0	1	0	1	0	0	0	1	0	1	1	1	0	1	0
Corynebacterium simulans strain PES1	Bacteria	Actinobacteria	Corynebacteriales	0	0	0	0	1	0	0	0	0	0	0	0	0	0	0	0	0	0	1	1	0	1	0	1	0	1	0	0	0	1	0	1	1	1	0	1	0
Corynebacterium simulans strain Wattiau	Bacteria	Actinobacteria	Corynebacteriales	0	0	0	0	1	0	0	0	0	0	0	0	0	0	0	0	0	0	1	1	0	1	0	1	0	1	0	0	0	1	0	1	1	1	0	1	0
Corynebacterium singulare strain IBS B52218	Bacteria	Actinobacteria	Corynebacteriales	0	0	0	0	1	0	0	0	0	0	0	0	0	0	0	0	0	0	1	1	0	1	0	1	0	1	0	0	0	1	0	1	1	1	0	1	0
Corynebacterium sp. ATCC 6931	Bacteria	Actinobacteria	Corynebacteriales	0	0	0	0	1	0	0	0	0	0	0	0	0	0	0	0	0	0	1	1	0	1	0	1	0	1	0	0	0	1	0	1	1	1	0	1	0
Confluentimicrobium sp. EMB200-NS6	Bacteria	Proteobacteria	Alphaproteobacteria	0	0	0	0	1	0	0	0	0	0	0	0	0	0	0	0	0	0	1	0	0	1	1	1	1	0	0	0	0	1	0	1	1	1	1	0	0
Corynebacterium sp. JZ16	Bacteria	Actinobacteria	Corynebacteriales	0	0	0	0	0	0	0	0	0	0	0	0	0	0	0	0	0	0	1	1	0	1	0	1	1	1	0	0	0	1	0	1	1	1	0	1	0
Colwellia sp. PAMC 20917	Bacteria	Proteobacteria	Gammaproteobacteria	0	0	0	0	0	0	0	0	0	0	0	0	1	0	0	0	0	0	1	1	0	1	1	1	1	1	1	1	0	1	0	1	1	1	0	0	1
Colwellia sp. MT41	Bacteria	Proteobacteria	Gammaproteobacteria	0	0	0	0	0	0	0	0	0	0	0	0	0	0	0	0	0	0	1	1	0	1	1	1	1	1	1	1	0	1	0	1	1	1	0	0	1
Corynebacterium sp. NML98-0116 genome.	Bacteria	Actinobacteria	Corynebacteriales	0	0	0	0	1	0	0	0	0	0	0	0	0	0	0	0	0	0	1	1	0	1	0	1	0	0	0	0	0	1	0	1	1	1	0	1	0
Corynebacterium stationis strain ATCC 6872	Bacteria	Actinobacteria	Corynebacteriales	0	0	0	0	0	0	0	0	0	0	0	0	0	0	0	0	0	0	1	1	0	1	0	1	0	1	0	0	0	1	0	1	1	1	0	1	0
Corynebacterium testudinoris strain DSM 44614	Bacteria	Actinobacteria	Corynebacteriales	0	0	0	0	0	0	0	0	0	0	0	0	0	0	0	0	0	0	1	1	0	1	0	1	1	1	0	0	0	1	0	1	1	1	0	1	0
Comamonas testosteroni CNB-2	Bacteria	Proteobacteria	Betaproteobacteria	0	0	0	0	0	0	0	0	0	0	0	0	0	0	0	0	0	0	1	0	0	1	1	1	1	1	1	1	0	1	0	1	1	1	0	0	1
Comamonas testosteroni TK102	Bacteria	Proteobacteria	Betaproteobacteria	0	0	0	0	0	0	0	0	0	0	0	0	0	0	0	0	0	0	1	0	0	1	1	1	1	1	1	0	0	1	0	1	1	1	0	0	1
Comamonas testosteroni P19 genome assembly Comamonas testosteroni P19	Bacteria	Proteobacteria	Betaproteobacteria	0	0	0	0	0	0	0	0	0	0	0	0	0	0	0	0	0	0	1	0	0	1	1	1	1	1	1	1	0	1	0	1	1	1	0	0	1
Corynebacterium terpenotabidum Y-11	Bacteria	Actinobacteria	Corynebacteriales	0	0	0	0	1	0	0	0	0	0	0	0	0	0	0	0	0	0	1	1	0	1	0	1	1	1	0	0	0	1	0	1	1	1	0	1	0
Corynebacterium ulcerans 809	Bacteria	Actinobacteria	Corynebacteriales	0	0	0	0	1	0	0	0	0	0	0	0	0	1	0	0	0	0	1	1	0	1	0	1	0	1	0	0	0	1	0	1	1	1	0	1	0
Corynebacterium ulcerans BR-AD22	Bacteria	Actinobacteria	Corynebacteriales	0	0	0	0	1	0	0	0	0	0	0	0	0	1	0	0	0	0	1	1	0	1	0	1	0	1	0	0	0	1	0	1	1	1	0	1	0
Corynebacterium ulcerans 0102 DNA	Bacteria	Actinobacteria	Corynebacteriales	0	0	0	0	1	0	0	0	0	0	0	0	0	1	0	0	0	0	1	1	0	1	0	1	0	1	0	0	0	1	0	1	1	1	0	1	0
Corynebacterium ulcerans FRC58	Bacteria	Actinobacteria	Corynebacteriales	0	0	0	0	1	0	0	0	0	0	0	0	0	1	0	0	0	0	1	1	0	1	0	1	0	1	0	0	0	1	0	1	1	1	0	1	0
Corynebacterium ulcerans strain 210932	Bacteria	Actinobacteria	Corynebacteriales	0	0	0	0	1	0	0	0	0	0	0	0	0	1	0	0	0	0	1	1	0	1	0	1	0	1	0	0	0	1	0	1	1	1	0	1	0
Corynebacterium ulcerans strain 210931	Bacteria	Actinobacteria	Corynebacteriales	0	0	0	0	1	0	0	0	0	0	0	0	0	1	0	0	0	0	1	1	0	1	0	1	0	1	0	0	0	1	0	1	1	1	0	1	0
Corynebacterium ulcerans FRC11	Bacteria	Actinobacteria	Corynebacteriales	0	0	0	0	1	0	0	0	0	0	0	0	0	1	0	0	0	0	1	1	0	1	0	1	0	1	0	0	0	1	0	1	1	1	0	1	0
Corynebacterium ulcerans strain 05146	Bacteria	Actinobacteria	Corynebacteriales	0	0	0	0	1	0	0	0	0	0	0	0	0	1	0	0	0	0	1	1	0	1	0	1	0	1	0	0	0	1	0	1	1	1	0	1	0
Corynebacterium ulcerans strain 131002	Bacteria	Actinobacteria	Corynebacteriales	0	0	0	0	1	0	0	0	0	0	0	0	0	0	0	0	0	0	1	1	0	1	0	1	0	1	0	0	0	1	0	1	1	1	0	1	0
Corynebacterium ulcerans strain 131001	Bacteria	Actinobacteria	Corynebacteriales	0	0	0	0	1	0	0	0	0	0	0	0	0	1	0	0	0	0	1	1	0	1	0	1	0	1	0	0	0	1	0	1	1	1	0	1	0
Corynebacterium ureicelerivorans strain IMMIB RIV-2301	Bacteria	Actinobacteria	Corynebacteriales	0	0	0	0	1	0	0	0	0	0	0	0	0	0	0	0	0	1	1	1	0	1	0	1	1	1	0	0	0	1	0	1	1	1	0	1	0
Corynebacterium urealyticum DSM 7109 complete genome.	Bacteria	Actinobacteria	Corynebacteriales	0	0	0	0	1	0	0	0	0	0	0	0	0	0	0	0	0	0	1	1	0	1	0	1	0	1	0	0	0	1	0	1	1	1	1	0	0
Corynebacterium urealyticum DSM 7111	Bacteria	Actinobacteria	Corynebacteriales	0	0	0	0	1	0	0	0	0	0	0	0	0	0	0	0	0	0	1	1	0	1	0	1	0	1	0	0	0	1	0	1	1	1	1	0	0
Corynebacterium uterequi strain DSM 45634	Bacteria	Actinobacteria	Corynebacteriales	0	0	0	0	1	0	0	0	0	0	0	0	0	0	0	0	0	0	1	1	0	1	0	1	0	1	0	0	0	1	0	1	1	1	0	1	0
Corynebacterium variabile DSM 44702	Bacteria	Actinobacteria	Corynebacteriales	0	0	0	0	0	0	0	0	0	0	0	0	0	0	0	0	0	0	1	1	0	1	0	1	1	1	0	0	0	1	0	1	1	1	0	1	0
Corynebacterium vitaeruminis DSM 20294	Bacteria	Actinobacteria	Corynebacteriales	0	0	0	0	1	0	0	0	0	0	0	0	0	0	0	0	0	0	1	1	0	1	0	1	0	1	0	0	0	1	0	1	1	1	0	1	0
Conexibacter woesei DSM 14684	Bacteria	Actinobacteria	Thermoleophilia	0	0	0	0	0	0	0	0	0	0	0	0	0	0	0	0	0	1	1	1	0	1	1	1	1	1	0	1	0	1	0	1	1	1	1	0	1
Cryobacterium arcticum strain PAMC 27867 chromosome 1	Bacteria	Actinobacteria	Micrococcales	0	0	0	0	0	0	0	0	0	0	0	0	0	0	0	0	0	1	1	1	0	1	0	1	1	1	0	0	0	1	0	1	1	1	0	1	0
Croceibacter atlanticus HTCC2559	Bacteria	Bacteroidetes	Flavobacteriia	0	0	0	0	0	0	0	0	0	0	0	0	0	0	0	0	0	0	1	1	0	1	1	1	1	1	0	0	0	0	0	1	1	1	1	0	0
Cronobacter condimenti 1330 strain LMG 26250	Bacteria	Proteobacteria	Gammaproteobacteria	0	0	0	0	0	0	0	0	0	0	0	0	0	0	0	0	0	0	1	1	0	1	1	1	1	1	1	1	0	1	0	1	1	1	0	0	1
Cryptobacterium curtum DSM 15641	Bacteria	Actinobacteria	Coriobacteriia	0	0	0	0	0	0	0	0	0	0	0	0	0	0	0	0	0	0	1	1	0	1	1	1	0	1	0	0	0	1	0	1	1	1	0	0	0
Cronobacter dublinensis subsp. dublinensis LMG 23823	Bacteria	Proteobacteria	Gammaproteobacteria	0	0	0	0	1	0	0	0	0	0	0	0	0	0	0	0	0	0	1	1	0	1	1	1	1	1	1	1	0	1	0	1	1	1	0	0	1
Crinalium epipsammum PCC 9333	Bacteria	Cyanobacteria	Oscillatoriophycideae	0	0	0	1	0	0	0	0	0	0	0	0	1	0	0	0	0	0	1	1	0	1	1	1	1	1	0	1	0	1	0	1	1	1	0	0	0
Cronobacter sakazakii CMCC 45402	Bacteria	Proteobacteria	Gammaproteobacteria	0	0	0	0	1	0	0	0	0	0	0	0	0	0	0	0	0	0	1	1	0	1	1	1	1	1	1	1	0	1	0	1	1	1	0	0	1
Cronobacter malonaticus LMG 23826	Bacteria	Proteobacteria	Gammaproteobacteria	0	0	0	0	1	0	0	0	0	0	0	0	0	0	0	0	0	0	1	1	0	1	1	1	1	1	1	1	0	1	0	1	1	1	0	0	1
Cronobacter muytjensii ATCC 51329	Bacteria	Proteobacteria	Gammaproteobacteria	0	0	0	0	0	1	0	0	0	0	0	0	0	0	0	0	0	0	1	1	0	1	1	1	1	1	1	1	0	1	0	1	1	1	0	0	1
Croceicoccus naphthovorans strain PQ-2	Bacteria	Proteobacteria	Alphaproteobacteria	0	0	0	0	0	0	0	0	0	0	0	0	0	0	0	0	0	1	1	0	0	1	1	1	1	1	0	0	0	1	0	1	1	1	1	0	0
Cronobacter sakazakii ATCC BAA-894	Bacteria	Proteobacteria	Gammaproteobacteria	0	0	0	0	1	0	0	0	0	0	0	0	0	0	0	0	0	0	1	1	0	1	1	1	1	1	1	1	0	1	0	1	1	1	0	0	1
Cronobacter sakazakii ES15	Bacteria	Proteobacteria	Gammaproteobacteria	0	0	0	0	1	0	0	0	0	0	0	0	0	0	0	0	0	0	1	1	0	1	1	1	1	1	1	1	0	1	0	1	1	1	0	0	1
Cronobacter sakazakii SP291	Bacteria	Proteobacteria	Gammaproteobacteria	0	0	0	0	1	0	0	0	0	0	0	0	0	0	0	0	0	0	1	1	0	1	1	1	1	1	1	1	0	1	0	0	1	1	0	0	1
Cronobacter sakazakii strain ATCC 29544	Bacteria	Proteobacteria	Gammaproteobacteria	0	0	0	0	0	0	0	0	0	0	0	0	0	0	0	0	0	0	1	1	0	1	1	1	1	1	1	1	0	1	0	1	1	1	0	0	1
Cronobacter sakazakii strain NCTC 8155	Bacteria	Proteobacteria	Gammaproteobacteria	0	0	0	0	1	0	0	0	0	0	0	0	0	0	0	0	0	0	1	1	0	1	1	1	1	1	1	1	0	1	0	1	1	1	0	0	1
Cronobacter turicensis z3032 complete genome.	Bacteria	Proteobacteria	Gammaproteobacteria	0	0	0	0	1	0	0	0	0	0	0	0	0	0	0	0	0	0	1	1	0	1	1	1	1	1	1	1	0	1	0	1	1	1	0	0	1
Cronobacter universalis NCTC 9529	Bacteria	Proteobacteria	Gammaproteobacteria	0	0	0	0	0	0	0	0	0	0	0	0	0	0	0	0	0	0	1	1	0	1	1	1	1	1	1	1	0	1	0	1	1	1	0	0	1
Propionibacterium avidum 44067	Bacteria	Actinobacteria	Propionibacteriales	0	0	0	0	1	0	0	0	0	0	0	0	0	0	0	0	0	0	1	1	0	1	0	1	1	1	0	0	0	1	0	1	1	1	0	1	1
Cutibacterium avidum strain DPC 6544	Bacteria	Actinobacteria	Propionibacteriales	0	0	0	0	1	0	0	0	0	0	0	0	0	0	0	0	0	0	1	1	0	1	0	1	0	1	0	0	0	1	0	1	1	1	0	1	1
Cupriavidus basilensis strain 4G11 chromosome main	Bacteria	Proteobacteria	Betaproteobacteria	0	0	0	0	0	0	0	0	0	0	0	0	0	0	0	0	0	1	1	0	0	1	1	1	1	1	0	1	0	1	0	1	1	1	1	0	0
Cupriavidus gilardii CR3 chromosome 1	Bacteria	Proteobacteria	Betaproteobacteria	0	0	0	0	0	0	0	0	0	0	0	0	0	0	0	0	0	1	1	0	0	1	1	1	1	1	0	1	0	1	0	1	1	1	0	0	0
Cupriavidus metallidurans CH34	Bacteria	Proteobacteria	Betaproteobacteria	0	0	0	0	0	0	0	0	0	0	0	0	0	0	0	0	0	0	1	0	0	1	1	1	1	1	0	1	0	1	0	1	1	1	1	0	0
Cupriavidus necator N-1 chromosome 1	Bacteria	Proteobacteria	Betaproteobacteria	0	0	0	0	0	0	0	0	0	0	0	0	0	0	0	0	0	1	1	0	0	1	1	1	1	1	0	1	0	1	0	1	1	1	1	0	0
Cupriavidus sp. USMAHM13 chromosome 1	Bacteria	Proteobacteria	Betaproteobacteria	0	0	0	0	0	0	0	0	0	0	0	0	0	0	0	0	0	0	1	0	0	1	1	1	1	1	0	0	0	1	0	1	1	1	1	0	0
Curtobacterium sp. MR_MD2014	Bacteria	Actinobacteria	Micrococcales	0	0	0	0	0	0	0	0	0	0	0	0	0	0	0	0	0	1	1	1	0	1	0	1	1	1	0	1	0	1	0	1	0	1	0	1	0
Curtobacterium sp. BH-2-1-1	Bacteria	Actinobacteria	Micrococcales	0	0	0	0	0	0	0	0	0	0	0	0	0	0	0	0	0	1	1	1	0	1	0	1	1	1	0	0	0	1	0	1	1	1	0	1	0
Cupriavidus sp. USMAA1020 chromosome 1	Bacteria	Proteobacteria	Betaproteobacteria	0	0	0	0	0	0	0	0	0	0	0	0	0	0	0	0	0	1	1	0	0	1	1	1	1	1	0	0	0	1	0	1	1	1	1	0	0
Cupriavidus sp. USMAA2-4 chromosome 1	Bacteria	Proteobacteria	Betaproteobacteria	0	0	0	0	0	0	0	0	0	0	0	0	0	0	0	0	0	0	1	0	0	1	1	1	1	1	0	0	0	1	0	1	1	1	1	0	0
Cyclobacterium amurskyense strain KCTC 12363	Bacteria	Bacteroidetes	Cytophagia	0	0	0	0	0	0	0	0	0	0	0	0	0	0	0	0	0	1	1	1	0	1	1	1	1	1	0	0	0	0	0	1	1	1	1	0	0
Cyanobacterium aponinum PCC 10605	Bacteria	Cyanobacteria	Oscillatoriophycideae	0	0	0	0	0	0	0	0	0	1	1	0	0	0	0	0	0	0	1	1	0	1	1	1	1	0	0	1	0	1	0	1	0	1	0	0	0
Cyanobacterium endosymbiont of Epithemia turgida isolate EtSB Lake Yunoko DNA	Bacteria	Cyanobacteria		0	0	0	0	0	0	0	0	0	0	0	0	0	0	0	0	0	0	1	1	0	1	1	1	1	0	0	1	0	1	0	1	0	1	0	0	0
Cyanobium gracile PCC 6307	Bacteria	Cyanobacteria	Oscillatoriophycideae	0	0	0	0	0	0	0	0	0	0	0	0	0	0	0	0	0	0	1	1	0	1	1	1	1	0	0	0	0	1	0	0	1	1	0	0	1
Cytophaga hutchinsonii ATCC 33406	Bacteria	Bacteroidetes	Cytophagia	0	0	0	0	0	0	0	0	0	0	0	0	0	0	0	0	0	1	1	1	0	1	1	1	1	1	0	0	0	1	0	1	1	1	0	0	0
Cyclobacterium marinum DSM 745	Bacteria	Bacteroidetes	Cytophagia	0	0	0	0	0	0	0	0	0	0	0	0	0	0	0	0	0	1	1	1	0	1	1	1	1	1	0	1	0	0	0	1	1	1	1	0	0
Cycloclasticus sp. P1	Bacteria	Proteobacteria	Gammaproteobacteria	0	0	0	0	0	0	0	0	0	0	0	0	0	0	0	0	0	0	1	1	0	1	1	1	1	1	1	0	0	1	0	1	1	1	1	0	0
Cyanothece sp. PCC 7425	Bacteria	Cyanobacteria	Oscillatoriophycideae	0	0	0	1	1	0	0	0	0	0	1	0	1	0	0	0	0	0	1	1	0	1	1	1	1	0	0	1	0	1	0	1	1	1	0	0	0
Cyanothece sp. PCC 8802	Bacteria	Cyanobacteria	Oscillatoriophycideae	0	0	0	1	0	0	0	0	0	0	0	0	0	0	0	0	0	0	1	1	0	1	1	1	1	0	0	1	0	1	0	1	1	1	0	0	0
Cyanothece sp. PCC 8801	Bacteria	Cyanobacteria	Oscillatoriophycideae	1	0	0	1	0	0	0	0	0	0	0	0	0	0	0	0	0	0	1	1	0	1	1	1	1	0	0	1	0	1	0	1	1	1	0	0	0
Cyanothece sp. ATCC 51142 circular chromosome	Bacteria	Cyanobacteria	Oscillatoriophycideae	1	0	0	0	0	0	0	0	0	0	1	0	0	0	0	0	0	0	1	1	0	1	1	1	1	0	0	1	0	1	0	1	0	1	0	0	0
Cyanothece sp. PCC 7822	Bacteria	Cyanobacteria	Oscillatoriophycideae	1	0	0	1	0	0	0	0	0	0	1	0	0	0	0	0	0	0	1	1	0	1	1	1	1	0	0	1	0	1	0	1	0	1	0	0	0
Cyanothece sp. PCC 7424	Bacteria	Cyanobacteria	Oscillatoriophycideae	1	0	0	1	1	0	0	0	0	0	1	0	0	0	0	0	0	0	1	1	0	1	1	1	1	0	0	1	0	1	0	1	0	1	0	0	0
Cycloclasticus zancles 7-ME	Bacteria	Proteobacteria	Gammaproteobacteria	0	0	0	0	1	0	0	0	0	0	0	0	0	0	0	0	0	0	1	1	0	1	1	1	1	1	1	0	0	1	0	1	1	1	1	0	0
Dactylococcopsis salina PCC 8305	Bacteria	Cyanobacteria	Oscillatoriophycideae	0	0	0	0	0	0	0	0	0	0	0	0	0	0	0	0	0	0	1	1	0	1	1	1	1	1	0	1	0	0	0	1	1	1	0	0	0
Denitrovibrio acetiphilus DSM 12809	Bacteria	Deferribacteres	Deferribacterales	0	0	0	0	0	0	0	0	0	0	0	0	0	0	0	0	0	0	1	0	0	1	1	1	0	1	0	0	0	1	0	1	1	1	0	0	1
Deinococcus actinosclerus strain BM2	Bacteria	Deinococcus-Thermus	Deinococci	0	0	0	0	0	0	0	0	0	0	0	0	0	0	0	0	0	0	1	1	0	1	1	1	1	1	0	1	0	0	0	1	1	1	0	0	0
Desulfurella acetivorans A63	Bacteria	Proteobacteria	Deltaproteobacteria	0	1	0	0	0	0	0	0	0	0	0	0	0	0	0	0	0	0	1	0	0	1	1	1	0	1	0	0	0	1	0	1	1	1	1	0	0
Desulfotomaculum acetoxidans DSM 771	Bacteria	Firmicutes	Clostridia	0	1	1	0	0	0	0	0	0	0	1	0	0	0	0	0	0	0	1	1	0	1	1	1	1	1	0	0	1	1	0	1	1	1	0	0	0
Desulfobacca acetoxidans DSM 11109	Bacteria	Proteobacteria	Deltaproteobacteria	0	0	0	0	0	0	0	0	0	1	0	0	1	0	0	0	0	0	1	0	0	1	1	1	0	0	0	0	0	1	0	1	1	1	1	0	0
Delftia acidovorans SPH-1	Bacteria	Proteobacteria	Betaproteobacteria	0	0	0	0	0	1	0	0	0	0	0	0	0	0	0	0	0	1	1	0	0	1	1	1	1	1	1	1	0	1	0	1	1	1	0	0	1
Desulfosporosinus acidiphilus SJ4	Bacteria	Firmicutes	Clostridia	0	0	1	0	0	0	0	0	0	0	0	0	0	0	0	0	0	1	1	1	0	1	1	1	1	1	0	0	0	1	0	1	1	1	1	0	0
Desulfovibrio aespoeensis Aspo-2	Bacteria	Proteobacteria	Deltaproteobacteria	0	0	0	0	0	0	0	0	0	0	0	0	0	0	0	0	0	0	0	0	0	1	1	1	1	0	0	0	0	1	0	1	1	1	1	0	0
Desulfovibrio africanus str. Walvis Bay	Bacteria	Proteobacteria	Deltaproteobacteria	0	0	0	0	0	0	0	0	0	0	0	0	0	0	0	0	0	1	1	0	0	1	1	1	1	0	0	0	0	1	0	1	1	1	1	0	0
Defluviimonas alba strain cai42	Bacteria	Proteobacteria	Alphaproteobacteria	0	0	1	0	1	0	0	0	0	0	0	0	0	0	0	0	0	1	1	0	0	0	0	1	1	0	0	0	0	1	0	0	0	0	0	0	0
Desulfatibacillum alkenivorans AK-01	Bacteria	Proteobacteria	Deltaproteobacteria	0	0	0	0	1	0	0	0	0	0	0	0	0	0	0	0	0	0	1	0	0	1	1	1	1	0	0	1	1	1	0	1	1	1	0	0	1
Desulfurivibrio alkaliphilus AHT2	Bacteria	Proteobacteria	Deltaproteobacteria	0	0	0	0	0	1	0	0	0	0	0	0	0	0	0	0	0	0	0	0	0	1	1	1	1	0	0	1	0	1	0	1	1	0	0	0	1
Desulfovibrio alaskensis G20	Bacteria	Proteobacteria	Deltaproteobacteria	0	0	0	0	1	0	0	0	0	0	0	0	0	0	0	0	0	0	1	0	0	1	1	1	1	0	0	0	0	1	0	1	1	1	0	0	0
Dechloromonas aromatica RCB	Bacteria	Proteobacteria	Betaproteobacteria	0	0	0	0	0	0	0	0	0	0	0	0	0	0	0	0	0	0	1	0	0	1	1	1	1	1	0	1	0	1	0	1	1	1	1	0	0
Desulfobacterium autotrophicum HRM2	Bacteria	Proteobacteria	Deltaproteobacteria	0	1	0	0	0	0	0	0	0	0	0	0	0	0	0	0	0	0	1	0	0	1	1	1	1	1	0	0	0	1	0	1	1	1	0	0	1
Desulfarculus baarsii DSM 2075	Bacteria	Proteobacteria	Deltaproteobacteria	0	0	1	0	0	0	0	0	0	0	0	0	0	0	0	0	0	0	1	0	0	1	1	1	0	0	0	1	0	1	0	1	1	1	1	0	0
Desulfomicrobium baculatum DSM 4028	Bacteria	Proteobacteria	Deltaproteobacteria	0	0	0	0	0	0	0	0	0	0	0	0	0	0	0	0	0	0	1	0	0	1	1	1	1	0	0	0	0	1	0	1	1	1	0	0	1
Deferribacter desulfuricans SSM1 DNA	Bacteria	Deferribacteres	Deferribacterales	0	1	0	0	0	0	0	0	0	0	0	0	0	0	0	0	0	0	1	0	0	1	1	1	0	1	0	0	0	1	0	1	1	1	0	0	1
Deinococcus deserti VCD115	Bacteria	Deinococcus-Thermus	Deinococci	0	0	0	0	0	0	0	0	0	0	0	0	0	0	0	0	0	0	1	1	0	1	1	1	1	1	0	1	0	1	0	1	1	1	0	0	0
Desulfitobacterium dehalogenans ATCC 51507	Bacteria	Firmicutes	Clostridia	0	0	0	0	0	0	0	0	0	0	0	0	0	0	0	0	0	1	1	1	0	1	1	1	1	1	0	1	0	1	0	1	1	1	1	0	0
Denitrobacterium detoxificans strain NPOH1	Bacteria	Actinobacteria	Coriobacteriia	0	0	0	0	0	0	0	0	0	0	0	0	0	0	0	0	0	0	1	1	0	1	1	1	1	1	0	1	0	1	0	1	1	1	1	0	0
Desulfovibrio desulfuricans subsp. desulfuricans str. ATCC 27774	Bacteria	Proteobacteria	Deltaproteobacteria	0	0	0	0	1	0	0	0	0	0	0	0	0	0	0	0	0	0	1	0	0	1	1	1	0	0	0	0	0	1	0	1	1	1	1	0	0
Desulfovibrio desulfuricans ND132	Bacteria	Proteobacteria	Deltaproteobacteria	0	0	1	0	0	0	0	0	0	0	0	0	0	0	0	0	0	0	1	0	0	1	1	1	1	0	0	0	0	1	0	1	1	1	1	0	0
Desulfitobacterium dichloroeliminans LMG P-21439	Bacteria	Firmicutes	Clostridia	0	0	0	0	0	0	0	0	0	0	0	0	0	0	0	0	0	1	1	1	0	1	1	1	1	1	0	1	0	1	0	1	1	1	1	0	0
Desulfovibrio fairfieldensis strain CCUG 45958	Bacteria	Proteobacteria	Deltaproteobacteria	0	0	0	0	0	0	0	0	0	0	0	0	0	0	0	0	0	0	1	0	0	1	1	1	0	0	0	0	0	1	0	1	1	1	1	0	0
Desulfurococcus fermentans DSM 16532	Archaea	Crenarchaeota	Thermoprotei	1	0	0	0	0	0	0	0	0	0	0	0	0	0	0	0	0	0	0	0	0	0	0	0	0	0	0	0	0	0	0	0	0	0	0	0	0
Deinococcus geothermalis DSM 11300	Bacteria	Deinococcus-Thermus	Deinococci	0	0	1	0	1	0	0	0	0	0	1	0	0	0	0	0	0	0	1	1	0	1	1	1	0	1	0	1	0	1	0	1	1	1	0	0	0
Desulfotomaculum gibsoniae DSM 7213	Bacteria	Firmicutes	Clostridia	0	1	1	0	0	0	0	0	0	0	0	0	0	0	0	0	0	1	1	1	0	1	1	1	1	1	0	0	0	1	0	1	1	1	1	0	0
Deinococcus gobiensis I-0	Bacteria	Deinococcus-Thermus	Deinococci	0	0	0	0	1	0	0	0	0	0	0	0	0	0	0	0	0	0	1	1	0	1	1	1	1	1	0	1	0	1	0	1	1	1	0	0	0
Desulfitobacterium hafniense Y51 DNA	Bacteria	Firmicutes	Clostridia	0	1	0	0	0	0	0	0	0	0	0	0	0	0	0	0	0	1	1	1	0	1	1	1	1	1	0	1	0	1	1	1	1	1	1	0	0
Desulfitobacterium hafniense DCB-2	Bacteria	Firmicutes	Clostridia	0	1	1	0	0	0	0	0	0	0	0	0	0	0	0	0	0	1	1	1	0	1	1	1	1	1	0	1	0	1	0	1	1	1	1	0	0
Desulfurispirillum indicum S5	Bacteria	Chrysiogenetes	Chrysiogenales	0	0	0	0	0	1	0	0	0	1	0	0	0	0	0	0	0	0	1	0	0	1	1	1	0	1	0	0	0	1	0	1	1	1	1	0	0
Desulfurococcus kamchatkensis 1221n	Archaea	Crenarchaeota	Thermoprotei	1	0	0	0	0	0	0	0	0	0	1	0	0	0	0	0	0	0	0	0	0	0	0	0	0	0	0	0	0	0	0	0	0	0	0	0	0
Desulfotomaculum kuznetsovii DSM 6115	Bacteria	Firmicutes	Clostridia	1	1	0	0	0	0	0	0	0	0	1	0	0	0	0	0	0	1	1	1	0	1	1	1	0	0	0	0	0	1	1	1	1	1	1	0	0
Dehalogenimonas lykanthroporepellens BL-DC-9	Bacteria	Chloroflexi	Dehalococcoidia	0	0	0	0	0	0	0	0	0	0	0	0	0	0	0	0	0	0	1	0	0	1	1	1	0	1	0	1	0	1	0	1	1	1	0	0	0
Desulfovibrio magneticus RS-1 DNA	Bacteria	Proteobacteria	Deltaproteobacteria	0	0	1	0	0	1	0	0	0	0	0	0	0	0	0	0	0	0	1	0	0	1	1	1	1	0	0	0	0	1	0	1	1	1	1	0	0
Deinococcus maricopensis DSM 21211	Bacteria	Deinococcus-Thermus	Deinococci	0	0	0	0	0	0	0	0	0	0	0	0	0	0	0	0	0	0	1	1	0	1	1	1	1	1	0	1	0	0	0	1	1	1	0	0	0
Dehalococcoides sp. CBDB1 complete genome.	Bacteria	Chloroflexi	Dehalococcoidia	0	0	0	0	1	0	0	0	0	0	0	0	0	0	0	0	0	0	1	0	0	1	1	1	0	1	0	1	0	1	0	1	1	1	0	0	0
Dehalococcoides ethenogenes 195	Bacteria	Chloroflexi	Dehalococcoidia	0	0	0	0	0	0	0	0	0	0	0	0	0	0	0	0	0	0	1	0	0	1	1	1	0	1	0	1	0	1	0	1	1	1	0	0	0
Dehalococcoides sp. BAV1	Bacteria	Chloroflexi	Dehalococcoidia	0	0	0	0	0	0	0	0	0	0	0	0	0	0	0	0	0	0	1	0	0	1	1	1	0	1	0	1	0	1	0	1	1	1	0	0	0
Dehalococcoides sp. VS	Bacteria	Chloroflexi	Dehalococcoidia	0	0	0	0	0	0	0	0	0	0	0	0	0	0	0	0	0	0	1	0	0	1	1	1	0	1	0	1	0	1	0	1	1	1	0	0	0
Dehalococcoides sp. GT	Bacteria	Chloroflexi	Dehalococcoidia	0	0	0	0	1	0	0	0	0	0	0	0	0	0	0	0	0	0	1	0	0	1	1	1	0	1	0	1	0	1	0	1	1	1	0	0	0
Dehalococcoides mccartyi DCMB5	Bacteria	Chloroflexi	Dehalococcoidia	0	0	1	0	1	0	0	0	0	0	0	0	0	0	0	0	0	0	1	0	0	1	1	1	0	1	0	1	0	1	0	1	1	1	0	0	0
Dehalococcoides mccartyi BTF08	Bacteria	Chloroflexi	Dehalococcoidia	0	0	0	0	0	0	0	0	0	0	0	0	0	0	0	0	0	0	1	0	0	1	1	1	0	1	0	1	0	1	0	1	1	1	0	0	0
Dehalococcoides mccartyi GY50	Bacteria	Chloroflexi	Dehalococcoidia	0	0	0	0	0	0	0	0	0	0	0	0	0	0	0	0	0	0	1	0	0	1	1	1	0	1	0	1	0	1	0	1	1	1	0	0	0
Dehalococcoides mccartyi CG5	Bacteria	Chloroflexi	Dehalococcoidia	0	0	0	0	0	0	0	0	0	0	0	0	0	0	0	0	0	0	1	0	0	1	1	1	0	1	0	1	0	1	0	1	1	1	0	0	0
Dehalococcoides mccartyi CG4	Bacteria	Chloroflexi	Dehalococcoidia	0	0	0	0	0	0	0	0	0	0	0	0	0	0	0	0	0	0	1	0	0	1	1	1	0	1	0	1	0	1	0	1	1	1	0	0	0
Dehalococcoides mccartyi CG1	Bacteria	Chloroflexi	Dehalococcoidia	0	0	0	0	0	0	0	0	0	0	0	0	0	0	0	0	0	0	1	0	0	1	1	1	0	1	0	1	0	1	0	1	1	1	0	0	0
Dehalococcoides mccartyi IBARAKI DNA	Bacteria	Chloroflexi	Dehalococcoidia	0	0	0	0	0	0	0	0	0	0	0	0	0	0	0	0	0	0	1	0	0	1	1	1	0	1	0	1	0	1	0	1	1	1	0	0	0
Dehalococcoides mccartyi strain 11a5	Bacteria	Chloroflexi	Dehalococcoidia	0	0	0	0	1	0	0	0	0	0	0	0	0	0	0	0	0	0	1	0	0	1	1	1	0	1	0	1	0	1	0	1	1	1	0	0	0
Desulfitobacterium metallireducens DSM 15288	Bacteria	Firmicutes	Clostridia	0	0	0	0	0	0	0	0	0	0	0	0	0	0	0	0	0	1	1	1	0	1	1	1	1	1	0	1	0	1	0	1	1	1	1	0	0
Desulfosporosinus meridiei DSM 13257	Bacteria	Firmicutes	Clostridia	0	0	0	0	0	0	0	0	0	0	0	0	0	0	0	0	0	1	1	1	0	1	1	1	1	1	0	0	0	1	0	1	1	1	1	0	0
Desulfurococcus mucosus DSM 2162	Archaea	Crenarchaeota	Thermoprotei	1	0	0	0	0	0	0	0	0	0	0	0	0	0	0	0	0	0	0	0	0	0	0	0	0	0	0	0	0	0	0	0	0	0	0	0	0
Desulfococcus multivorans strain DSM 2059	Bacteria	Proteobacteria	Deltaproteobacteria	1	0	0	0	0	0	0	0	0	0	1	0	0	0	0	0	0	0	1	0	0	1	1	1	1	1	0	0	0	1	0	1	1	1	0	0	1
Dermacoccus nishinomiyaensis strain M25	Bacteria	Actinobacteria	Micrococcales	0	0	0	0	0	0	0	0	0	0	0	0	0	0	0	0	0	1	1	1	0	1	0	1	0	1	0	1	0	1	0	1	1	1	0	1	1
Desulfotomaculum carboxydivorans CO-1-SRB	Bacteria	Firmicutes	Clostridia	0	0	1	0	0	0	0	0	0	1	0	0	0	0	0	0	0	1	1	1	0	1	1	1	1	0	0	0	0	1	0	1	1	1	1	0	0
Desulfococcus oleovorans Hxd3	Bacteria	Proteobacteria	Deltaproteobacteria	0	0	0	0	1	0	0	0	0	1	0	0	0	0	0	0	0	0	1	0	0	1	1	1	0	0	0	0	0	1	0	1	1	1	0	0	1
Desulfomicrobium orale DSM 12838	Bacteria	Proteobacteria	Deltaproteobacteria	0	0	1	0	0	0	0	0	0	1	0	0	0	0	0	0	0	0	1	0	0	1	1	1	0	0	0	1	0	0	0	1	1	1	0	0	1
Desulfosporosinus orientis DSM 765	Bacteria	Firmicutes	Clostridia	0	0	1	0	0	0	0	0	0	0	0	0	0	0	0	0	0	1	1	1	0	1	1	1	1	1	0	1	0	1	0	1	1	1	1	0	0
Deinococcus peraridilitoris DSM 19664	Bacteria	Deinococcus-Thermus	Deinococci	0	0	0	0	0	0	0	0	0	0	0	0	0	0	0	0	0	0	1	1	0	1	1	1	1	1	0	1	0	1	0	1	1	1	1	0	0
Deinococcus proteolyticus MRP	Bacteria	Deinococcus-Thermus	Deinococci	0	0	0	0	1	0	0	0	0	0	0	0	0	0	0	0	0	0	1	1	0	1	1	1	0	0	0	1	0	0	0	1	1	1	0	0	0
Desulfobulbus propionicus DSM 2032	Bacteria	Proteobacteria	Deltaproteobacteria	0	0	1	0	0	0	0	0	0	0	0	0	0	0	0	0	0	0	1	0	0	1	1	1	0	0	0	1	0	1	0	1	1	1	0	0	1
Desulfotalea psychrophila LSv54 chromosome.	Bacteria	Proteobacteria	Deltaproteobacteria	0	0	0	0	0	0	0	0	0	0	0	0	0	1	0	0	0	0	1	0	0	1	1	0	0	0	0	1	0	0	0	0	0	0	0	0	1
Deinococcus puniceus strain DY1	Bacteria	Deinococcus-Thermus	Deinococci	0	0	0	0	0	0	0	0	0	0	0	0	0	0	0	0	0	0	1	1	0	1	1	1	1	1	0	1	0	0	0	1	1	1	0	0	0
Deinococcus radiodurans R1 chromosome 1	Bacteria	Deinococcus-Thermus	Deinococci	0	0	0	0	0	0	0	0	0	0	0	0	0	0	0	0	0	0	1	1	0	1	1	1	1	1	0	1	0	1	0	1	1	1	0	0	0
Deinococcus radiodurans R1 chromosome 1	Bacteria	Deinococcus-Thermus	Deinococci	0	0	0	0	0	0	0	0	0	0	0	0	0	0	0	0	0	0	1	1	0	1	1	1	1	1	0	1	0	1	0	1	1	1	0	0	0
Desulfohalobium retbaense DSM 5692	Bacteria	Proteobacteria	Deltaproteobacteria	0	0	0	0	0	0	0	0	0	0	0	0	0	1	0	0	0	0	1	0	0	1	1	1	0	0	0	0	0	1	0	1	1	1	1	0	0
Dehalobacter restrictus DSM 9455	Bacteria	Firmicutes	Clostridia	0	0	0	0	0	0	0	0	0	0	0	0	0	0	0	0	0	1	1	1	0	1	1	1	1	1	0	0	0	1	0	1	1	1	1	0	0
Desulfotomaculum reducens MI-1	Bacteria	Firmicutes	Clostridia	0	1	1	0	0	0	0	0	0	1	0	0	0	0	0	0	0	1	1	1	0	1	1	1	1	1	0	0	0	1	0	1	1	1	1	0	0
Desulfotomaculum ruminis DSM 2154	Bacteria	Firmicutes	Clostridia	0	1	1	0	0	0	0	0	0	0	0	1	1	0	0	0	0	1	1	1	0	1	1	1	1	0	0	0	0	1	0	1	1	1	1	0	0
Desulfovibrio salexigens DSM 2638	Bacteria	Proteobacteria	Deltaproteobacteria	0	0	0	0	0	0	0	0	0	0	0	0	0	0	0	0	0	0	1	0	0	1	1	1	1	0	0	0	0	1	0	1	1	1	1	0	0
'Deinococcus soli' Cha et al. 2014 strain N5	Bacteria	Deinococcus-Thermus	Deinococci	0	0	0	0	0	0	0	0	0	0	0	0	0	0	0	0	0	0	1	1	0	1	1	1	1	1	0	1	0	0	0	1	1	1	0	0	0
Desulfuromonas sp. WTL	Bacteria	Proteobacteria	Deltaproteobacteria	0	0	0	0	0	0	0	0	0	0	0	0	0	0	0	0	0	0	1	0	0	1	1	1	1	1	0	0	0	1	0	1	1	1	0	0	1
Dehalobacter sp. CF	Bacteria	Firmicutes	Clostridia	0	0	0	0	0	0	0	0	0	0	0	0	0	0	0	0	0	1	1	1	0	1	1	1	1	1	0	0	0	1	0	1	1	1	1	0	0
Dehalobacter sp. DCA	Bacteria	Firmicutes	Clostridia	0	0	0	0	0	0	0	0	0	0	0	0	0	0	0	0	0	1	1	1	0	1	1	1	1	1	0	0	0	1	0	1	1	1	1	0	0
Dehalococcoides sp. UCH007 DNA	Bacteria	Chloroflexi	Dehalococcoidia	0	0	0	0	1	0	0	0	0	0	0	0	0	0	0	0	0	0	1	0	0	1	1	1	0	1	0	1	0	1	0	1	1	1	0	0	0
Devosia sp. H5989	Bacteria	Proteobacteria	Alphaproteobacteria	0	0	0	0	0	0	0	0	0	0	0	0	0	0	0	0	0	1	1	0	0	1	1	1	1	0	0	0	0	1	0	1	1	1	1	0	0
Desulfovibrio sp. J2	Bacteria	Proteobacteria	Deltaproteobacteria	0	0	1	0	0	0	0	0	0	0	0	0	0	0	0	0	0	0	1	0	0	1	1	1	1	0	0	0	0	1	0	1	1	1	1	0	0
Devosia sp. DDS-1	Bacteria	Proteobacteria	Alphaproteobacteria	0	0	0	0	0	0	0	0	0	0	0	0	0	0	0	0	0	1	1	1	0	1	1	1	1	0	0	0	0	1	0	1	1	1	1	0	0
Desulfuromonas sp. DDH964	Bacteria	Proteobacteria	Deltaproteobacteria	0	0	1	0	0	0	0	0	0	0	0	0	0	0	0	0	0	0	1	1	0	1	1	1	1	1	0	1	0	1	0	1	1	1	1	0	0
Delftia sp. Cs1-4	Bacteria	Proteobacteria	Betaproteobacteria	0	0	0	0	0	1	0	0	0	0	0	0	0	0	0	0	0	1	1	0	0	1	1	1	1	1	1	1	0	1	0	1	1	1	0	0	1
Dechlorosoma suillum PS	Bacteria	Proteobacteria	Betaproteobacteria	0	0	0	0	0	0	0	0	0	0	0	0	0	0	0	0	0	0	1	0	0	1	1	1	1	1	0	0	0	1	0	1	1	1	1	0	0
Desulfocapsa sulfexigens DSM 10523	Bacteria	Proteobacteria	Deltaproteobacteria	0	0	1	0	0	0	0	0	0	0	0	0	0	0	0	0	0	0	1	0	0	1	1	1	1	0	1	1	0	1	0	1	1	1	0	0	1
Deinococcus swuensis strain DY59	Bacteria	Deinococcus-Thermus	Deinococci	0	0	0	0	0	0	0	0	0	0	0	0	0	0	0	0	0	0	1	1	0	1	1	1	1	1	0	1	0	1	0	1	1	1	1	0	0
Desulfurobacterium thermolithotrophum DSM 11699	Bacteria	Aquificae	Desulfurobacteriales	0	0	0	0	0	0	0	0	0	0	0	0	0	0	0	0	0	0	1	0	0	1	0	1	0	1	0	0	0	0	0	1	0	1	0	0	0
Desulfomonile tiedjei DSM 6799	Bacteria	Proteobacteria	Deltaproteobacteria	0	0	1	0	1	0	0	0	0	0	0	0	0	0	0	0	0	1	1	0	0	0	0	1	0	0	0	1	0	1	0	1	1	1	1	0	0
Desulfobacula toluolica Tol2 complete genome.	Bacteria	Proteobacteria	Deltaproteobacteria	0	1	0	0	0	0	0	0	0	0	0	0	0	0	0	0	0	0	1	0	0	1	1	1	0	1	1	1	0	0	0	1	1	0	0	0	1
Delftia tsuruhatensis strain CM13	Bacteria	Proteobacteria	Betaproteobacteria	0	0	1	0	0	1	0	0	0	0	0	0	0	0	0	0	0	1	1	0	0	1	1	1	1	1	1	1	0	1	0	1	1	1	0	0	1
Defluviitoga tunisiensis genome assembly DTL3	Bacteria	Thermotogae	Petrotogales	0	0	0	0	0	0	0	0	0	0	0	0	0	0	0	0	0	0	1	0	0	1	1	0	0	1	0	0	0	1	0	1	1	1	1	0	0
Dermabacter vaginalis strain AD1-86	Bacteria	Actinobacteria	Micrococcales	0	0	0	0	0	0	0	0	0	0	0	0	0	0	0	0	0	0	1	0	0	1	0	1	0	1	0	0	0	1	0	1	1	1	0	1	0
Desulfovibrio vulgaris DP4	Bacteria	Proteobacteria	Deltaproteobacteria	0	0	1	0	0	0	0	0	0	0	0	0	0	0	0	0	0	0	1	0	0	1	1	1	0	0	0	0	0	1	0	1	1	1	1	0	0
Desulfovibrio vulgaris str. 'Miyazaki F'	Bacteria	Proteobacteria	Deltaproteobacteria	0	0	1	0	0	0	0	0	0	0	0	0	0	0	0	0	0	0	1	0	0	1	1	1	0	0	0	0	0	1	0	1	1	1	0	0	0
Desulfovibrio vulgaris RCH1	Bacteria	Proteobacteria	Deltaproteobacteria	0	0	1	0	0	0	0	0	0	0	0	0	0	0	0	0	0	0	1	0	0	1	1	1	0	0	0	0	0	1	0	1	1	1	1	0	0
Desulfovibrio vulgaris str. Hildenborough chromosome	Bacteria	Proteobacteria	Deltaproteobacteria	0	0	1	0	0	0	0	0	0	0	0	0	0	0	0	0	0	0	1	0	0	1	1	1	0	0	0	0	0	1	0	1	1	1	1	0	0
Dickeya dadantii 3937	Bacteria	Proteobacteria	Gammaproteobacteria	0	0	1	0	0	1	0	0	0	0	0	0	0	0	0	0	0	0	1	1	0	1	1	1	1	1	1	1	0	1	0	1	1	1	0	0	1
Dichelobacter nodosus VCS1703A	Bacteria	Proteobacteria	Gammaproteobacteria	0	0	0	0	0	1	0	0	0	0	0	0	0	0	0	0	0	0	1	1	0	1	1	1	0	1	0	1	0	0	0	1	1	1	0	0	1
Dialister pneumosintes strain F0677	Bacteria	Firmicutes	Negativicutes	0	0	0	0	0	0	1	0	0	0	0	0	0	0	0	0	0	0	1	1	0	1	1	1	1	1	0	1	0	1	0	1	1	1	1	0	0
Dinoroseobacter shibae DFL 12	Bacteria	Proteobacteria	Alphaproteobacteria	0	0	0	0	1	0	0	0	0	0	0	0	0	0	0	0	0	0	1	0	0	1	1	1	1	0	0	0	0	1	0	1	1	1	1	0	0
Dickeya solani IPO 2222	Bacteria	Proteobacteria	Gammaproteobacteria	0	0	0	0	0	0	0	0	0	0	0	0	0	0	0	0	0	0	1	1	0	1	1	1	1	1	1	1	0	1	0	1	1	1	0	0	1
Dictyoglomus thermophilum H-6-12	Bacteria	Dictyoglomi	Dictyoglomales	0	1	0	0	0	0	0	0	0	1	0	0	0	0	0	0	0	0	1	1	0	1	1	1	0	0	0	0	0	1	0	1	1	1	0	0	0
Dictyoglomus turgidum DSM 6724 chromosome	Bacteria	Dictyoglomi	Dictyoglomales	0	1	0	0	0	0	0	0	0	1	0	0	0	0	0	0	0	0	1	1	0	1	1	1	0	0	0	0	0	1	0	1	1	1	0	0	0
Dickeya dadantii Ech586	Bacteria	Proteobacteria	Gammaproteobacteria	0	0	0	0	1	1	0	0	0	1	0	0	0	0	0	0	0	0	1	1	0	1	1	1	1	1	1	1	0	1	0	1	1	1	0	0	1
Dickeya zeae EC1	Bacteria	Proteobacteria	Gammaproteobacteria	0	0	0	0	1	0	0	0	0	0	0	0	0	0	0	0	0	0	1	1	0	1	1	1	1	1	1	1	0	1	0	1	1	1	0	0	1
Dokdonia donghaensis DSW-1	Bacteria	Bacteroidetes	Flavobacteriia	0	0	0	0	0	0	0	0	0	0	0	0	0	0	0	0	0	0	1	1	0	1	1	1	1	1	0	0	0	0	0	1	1	1	1	0	0
Dokdonella koreensis DS-123	Bacteria	Proteobacteria	Gammaproteobacteria	0	0	1	0	0	1	0	0	0	0	0	0	0	0	0	0	0	1	1	1	0	1	1	1	1	1	1	0	0	1	0	1	1	1	0	0	1
Dokdonia sp. MED134	Bacteria	Bacteroidetes	Flavobacteriia	0	0	0	0	0	0	0	0	0	0	0	0	0	0	0	0	0	0	1	1	0	1	1	1	1	1	0	0	0	0	0	1	1	1	1	0	0
Krokinobacter sp. 4H-3-7-5	Bacteria	Bacteroidetes	Flavobacteriia	0	0	0	0	0	0	0	0	0	0	0	0	0	0	0	0	0	0	1	1	0	1	1	1	1	1	0	0	0	0	0	1	1	1	1	0	0
Draconibacterium orientale strain FH5T	Bacteria	Bacteroidetes	Bacteroidia	0	0	0	0	0	0	0	0	0	0	0	0	0	0	0	0	0	0	1	1	0	0	1	1	1	1	0	1	0	0	0	1	1	1	1	0	0
Dyadobacter fermentans DSM 18053	Bacteria	Bacteroidetes	Cytophagia	0	0	0	0	0	0	0	0	0	0	0	0	0	0	0	0	0	1	1	1	0	1	1	1	1	1	0	1	0	0	0	1	1	1	1	0	0
Dyella japonica A8	Bacteria	Proteobacteria	Gammaproteobacteria	0	0	0	0	0	0	0	0	0	0	0	0	0	0	0	0	0	0	1	1	0	1	1	1	1	1	1	0	0	1	0	1	1	1	0	0	1
Dyella jiangningensis strain SBZ 3-12	Bacteria	Proteobacteria	Gammaproteobacteria	0	0	0	0	0	0	0	0	0	0	0	0	0	0	0	0	0	1	1	1	0	1	1	1	1	1	1	0	0	1	0	1	1	1	0	0	1
Dyella thiooxydans strain ATSB10	Bacteria	Proteobacteria	Gammaproteobacteria	0	0	0	0	0	0	0	0	0	0	0	0	0	0	0	0	0	0	1	1	0	1	1	1	1	1	1	0	0	1	0	1	1	1	0	0	1
Ectothiorhodospira sp. BSL-9	Bacteria	Proteobacteria	Gammaproteobacteria	0	0	0	0	0	0	0	0	0	0	0	0	0	0	0	0	0	0	1	0	0	1	1	1	1	1	0	0	0	1	0	1	1	1	0	0	1
Echinicola vietnamensis DSM 17526	Bacteria	Bacteroidetes	Cytophagia	0	0	0	0	0	0	0	0	0	0	0	0	0	0	0	0	0	0	1	1	0	1	1	1	1	1	0	0	0	0	0	1	1	1	1	0	0
Edwardsiella tarda 080813	Bacteria	Proteobacteria	Gammaproteobacteria	0	0	0	0	1	0	0	0	0	0	0	0	0	0	0	0	0	0	1	1	0	1	1	1	1	1	1	1	0	1	0	1	1	1	0	0	1
Edwardsiella hoshinae strain ATCC 35051	Bacteria	Proteobacteria	Gammaproteobacteria	0	0	0	0	1	0	0	0	0	0	0	0	0	0	0	0	0	0	1	1	0	1	1	1	1	1	1	1	0	1	0	1	1	1	0	0	1
Edwardsiella ictaluri 93-146	Bacteria	Proteobacteria	Gammaproteobacteria	0	0	0	0	0	0	0	0	0	0	0	0	0	0	0	0	0	0	1	1	0	1	1	1	1	1	1	1	0	1	0	1	1	1	0	0	1
Edwardsiella piscicida C07-087	Bacteria	Proteobacteria	Gammaproteobacteria	0	0	0	0	0	0	0	0	0	0	0	0	0	0	0	0	0	0	1	1	0	1	1	1	1	1	1	1	0	1	0	1	1	1	0	0	1
Edwardsiella piscicida strain S11-285	Bacteria	Proteobacteria	Gammaproteobacteria	0	0	0	0	1	0	0	0	0	0	0	0	0	0	0	0	0	0	1	1	0	1	1	1	1	1	1	1	0	1	0	1	1	1	0	0	1
Edwardsiella sp. EA181011	Bacteria	Proteobacteria	Gammaproteobacteria	0	0	0	0	1	0	0	0	0	0	0	0	0	0	0	0	0	0	1	1	0	1	1	1	1	1	1	1	0	1	0	1	1	1	0	0	1
Edwardsiella tarda EIB202	Bacteria	Proteobacteria	Gammaproteobacteria	0	0	0	0	0	0	0	0	0	0	0	0	0	0	0	0	0	0	1	1	0	1	1	1	1	1	1	1	0	1	0	1	1	1	0	0	1
Edwardsiella tarda FL6-60	Bacteria	Proteobacteria	Gammaproteobacteria	0	0	0	0	0	0	0	0	0	0	0	0	0	0	0	0	0	0	1	1	0	1	1	1	1	1	1	1	0	1	0	1	1	1	0	0	1
Edwardsiella tarda strain FL95-01	Bacteria	Proteobacteria	Gammaproteobacteria	0	0	0	0	0	0	0	0	0	0	0	0	0	0	0	0	0	0	1	1	0	1	1	1	1	1	1	1	0	1	0	1	1	1	0	0	1
Eggerthella lenta DSM 2243	Bacteria	Actinobacteria	Coriobacteriia	0	0	1	0	0	0	0	0	0	0	0	0	0	0	0	0	0	1	1	1	0	1	1	1	1	1	0	0	0	1	0	1	1	1	1	0	0
Eggerthella sp. YY7918 DNA	Bacteria	Actinobacteria	Coriobacteriia	0	0	1	0	0	0	1	0	0	0	0	0	0	0	0	0	0	1	1	1	0	1	1	1	1	1	0	0	0	1	0	1	0	1	0	0	0
Ehrlichia canis str. Jake	Bacteria	Proteobacteria	Alphaproteobacteria	0	0	0	0	0	0	0	0	0	0	0	0	0	0	0	0	0	0	1	0	0	1	1	1	0	0	0	0	0	0	0	0	1	1	0	0	0
Ehrlichia chaffeensis str. Arkansas	Bacteria	Proteobacteria	Alphaproteobacteria	0	0	0	0	0	0	0	0	0	0	0	0	0	0	0	0	0	0	1	0	0	1	1	1	0	0	0	0	0	0	0	0	1	1	0	0	0
Ehrlichia chaffeensis str. Heartland	Bacteria	Proteobacteria	Alphaproteobacteria	0	0	0	0	0	0	0	0	0	0	0	0	0	0	0	0	0	0	1	0	0	1	1	1	0	0	0	0	0	0	0	0	1	1	0	0	0
Ehrlichia chaffeensis str. Jax	Bacteria	Proteobacteria	Alphaproteobacteria	0	0	0	0	0	0	0	0	0	0	0	0	0	0	0	0	0	0	1	0	0	1	1	1	0	0	0	0	0	0	0	0	1	1	0	0	0
Ehrlichia chaffeensis str. Liberty	Bacteria	Proteobacteria	Alphaproteobacteria	0	0	0	0	0	0	0	0	0	0	0	0	0	0	0	0	0	0	1	0	0	1	1	1	0	0	0	0	0	0	0	0	1	1	0	0	0
Ehrlichia chaffeensis str. Osceola	Bacteria	Proteobacteria	Alphaproteobacteria	0	0	0	0	0	0	0	0	0	0	0	0	0	0	0	0	0	0	1	0	0	1	1	1	0	0	0	0	0	0	0	0	1	1	0	0	0
Ehrlichia chaffeensis str. Saint Vincent	Bacteria	Proteobacteria	Alphaproteobacteria	0	0	0	0	0	0	0	0	0	0	0	0	0	0	0	0	0	0	1	0	0	1	1	1	0	0	0	0	0	0	0	0	1	1	0	0	0
Ehrlichia chaffeensis str. Wakulla	Bacteria	Proteobacteria	Alphaproteobacteria	0	0	0	0	0	0	0	0	0	0	0	0	0	0	0	0	0	0	1	0	0	1	1	1	0	0	0	0	0	0	0	0	1	1	0	0	0
Ehrlichia chaffeensis str. West Paces	Bacteria	Proteobacteria	Alphaproteobacteria	0	0	0	0	0	0	0	0	0	0	0	0	0	0	0	0	0	0	1	0	0	1	1	1	0	0	0	0	0	0	0	0	1	1	0	0	0
Ehrlichia muris AS145	Bacteria	Proteobacteria	Alphaproteobacteria	0	0	0	0	0	0	0	0	0	0	0	0	0	0	0	0	0	0	1	0	0	1	1	1	0	0	0	0	0	0	0	0	1	1	0	0	0
Ehrlichia ruminantium strain Welgevonden	Bacteria	Proteobacteria	Alphaproteobacteria	0	0	0	0	0	0	0	0	0	0	0	0	0	0	0	0	0	0	1	1	0	1	1	1	0	0	0	0	0	0	0	0	1	1	0	0	0
Ehrlichia ruminantium str. Gardel	Bacteria	Proteobacteria	Alphaproteobacteria	0	0	0	0	0	0	0	0	0	0	0	0	0	0	0	0	0	0	1	1	0	1	1	1	0	0	0	0	0	0	0	0	1	1	0	0	0
Ehrlichia ruminantium str. Welgevonden	Bacteria	Proteobacteria	Alphaproteobacteria	0	0	0	0	0	0	0	0	0	0	0	0	0	0	0	0	0	0	1	1	0	1	1	1	0	0	0	0	0	0	0	0	1	1	0	0	0
Ehrlichia sp. HF	Bacteria	Proteobacteria	Alphaproteobacteria	0	0	0	0	0	0	0	0	0	0	0	0	0	0	0	0	0	0	1	0	0	1	1	1	0	0	0	0	0	0	0	0	1	1	0	0	0
Elizabethkingia anophelis NUHP1	Bacteria	Bacteroidetes	Flavobacteriia	0	0	0	0	0	0	0	0	0	0	0	0	0	0	0	0	0	0	1	1	0	1	1	1	1	1	0	0	0	0	0	1	1	1	0	0	0
Elizabethkingia anophelis FMS-007	Bacteria	Bacteroidetes	Flavobacteriia	0	0	0	0	0	0	0	0	1	0	0	0	0	0	0	0	0	0	1	1	0	1	1	1	1	1	0	0	0	0	0	1	1	1	0	0	0
Elizabethkingia anophelis strain CSID_3015183678	Bacteria	Bacteroidetes	Flavobacteriia	0	0	0	0	0	0	0	0	0	0	0	0	0	0	0	0	0	0	1	1	0	1	1	1	1	1	0	0	0	0	0	1	1	1	0	0	0
Elizabethkingia anophelis strain CSID_3015183684	Bacteria	Bacteroidetes	Flavobacteriia	0	0	0	0	0	0	0	0	0	0	0	0	0	0	0	0	0	0	1	1	0	1	1	1	1	1	0	0	0	0	0	1	1	1	0	0	0
Elizabethkingia anophelis strain CSID_3000521207	Bacteria	Bacteroidetes	Flavobacteriia	0	0	0	0	0	0	0	0	0	0	0	0	0	0	0	0	0	0	1	1	0	1	1	1	1	1	0	0	0	0	0	1	1	1	0	0	0
Elizabethkingia anophelis strain CSID_3015183681	Bacteria	Bacteroidetes	Flavobacteriia	0	0	0	0	0	0	0	0	0	0	0	0	0	0	0	0	0	0	1	1	0	1	1	1	1	1	0	0	0	0	0	1	1	1	0	0	0
Elizabethkingia miricola strain BM10	Bacteria	Bacteroidetes	Flavobacteriia	0	0	0	0	0	0	0	0	1	0	0	0	0	0	0	0	0	0	1	1	0	1	1	1	1	1	0	0	0	0	0	1	1	1	1	0	0
Elusimicrobium minutum Pei191	Bacteria	Elusimicrobia	Elusimicrobia	0	0	0	0	0	0	0	0	1	0	0	0	0	0	0	0	0	0	1	0	0	1	0	1	0	0	0	0	0	1	0	1	1	1	1	0	0
Emticicia oligotrophica DSM 17448	Bacteria	Bacteroidetes	Cytophagia	0	0	0	0	0	0	0	0	0	0	0	0	0	0	0	0	0	0	1	1	0	1	1	1	1	1	0	1	0	1	0	1	1	1	1	0	0
Ensifer adhaerens strain Casida A	Bacteria	Proteobacteria	Alphaproteobacteria	0	0	0	0	0	0	0	0	0	0	0	0	0	0	0	0	0	1	1	0	0	1	1	1	1	1	0	0	0	1	0	1	1	1	1	0	0
Enterobacter aerogenes KCTC 2190 chromosome	Bacteria	Proteobacteria	Gammaproteobacteria	0	0	0	0	0	0	0	0	0	0	0	0	0	0	0	0	0	0	1	1	0	1	1	1	1	1	1	1	0	1	0	1	1	1	0	0	1
Enterobacter aerogenes EA1509E complete genome.	Bacteria	Proteobacteria	Gammaproteobacteria	0	0	0	0	0	0	0	0	0	0	0	0	0	0	0	0	0	0	1	1	0	1	1	1	1	1	1	1	0	1	0	1	1	1	0	0	1
Enterobacter aerogenes strain CAV1320	Bacteria	Proteobacteria	Gammaproteobacteria	0	0	0	0	0	0	0	0	0	0	0	0	0	0	0	0	0	0	1	1	0	1	1	1	1	1	1	1	0	1	0	1	1	1	0	0	1
Enterobacter aerogenes strain FDAARGOS_152	Bacteria	Proteobacteria	Gammaproteobacteria	0	0	0	0	0	0	0	0	0	0	0	0	0	0	0	0	0	0	1	1	0	1	1	1	1	1	1	1	0	1	0	1	1	1	0	0	1
Enterobacter aerogenes strain G7	Bacteria	Proteobacteria	Gammaproteobacteria	0	0	0	0	0	0	0	0	0	0	0	0	0	0	0	0	0	0	1	1	0	1	1	1	1	1	1	1	0	1	0	1	1	1	0	0	1
Enterobacter aerogenes strain FDAARGOS_139	Bacteria	Proteobacteria	Gammaproteobacteria	0	0	0	0	0	0	0	0	0	0	0	0	0	0	0	0	0	0	1	1	0	1	1	1	1	1	1	1	0	1	0	1	1	1	0	0	1
Enterobacter asburiae LF7a	Bacteria	Proteobacteria	Gammaproteobacteria	0	0	0	0	0	0	0	0	0	0	0	0	0	0	0	0	0	0	1	1	0	1	1	1	1	1	1	1	0	1	0	1	1	1	0	0	1
Enterobacter asburiae L1	Bacteria	Proteobacteria	Gammaproteobacteria	0	0	0	0	0	0	0	0	0	0	0	0	0	0	0	0	0	0	1	1	0	1	1	1	1	1	1	1	0	1	0	1	1	1	0	0	1
Enterobacter asburiae strain CAV1043	Bacteria	Proteobacteria	Gammaproteobacteria	0	0	0	0	0	0	0	0	0	0	0	0	0	0	0	0	0	0	1	1	0	1	1	1	1	1	1	1	0	1	0	1	1	1	0	0	1
Enterobacter asburiae strain ATCC 35953	Bacteria	Proteobacteria	Gammaproteobacteria	0	0	0	0	0	0	0	0	0	0	0	0	0	0	0	0	0	0	1	1	0	1	1	1	1	1	1	1	0	1	0	1	1	1	0	0	1
Enterobacteriaceae bacterium strain FGI 57	Bacteria	Proteobacteria	Gammaproteobacteria	0	0	0	0	0	0	0	0	0	0	0	0	0	0	0	0	0	0	1	1	0	1	1	1	1	1	1	1	0	1	0	1	1	1	0	0	1
Enterococcus casseliflavus EC20	Bacteria	Firmicutes	Lactobacillales	0	0	0	0	0	0	0	0	0	0	0	0	0	0	0	0	0	0	1	1	0	1	1	1	1	1	0	1	0	1	1	1	0	1	1	0	0
Enterobacter cloacae ECNIH3	Bacteria	Proteobacteria	Gammaproteobacteria	0	0	0	0	0	0	0	0	0	0	0	0	0	0	0	0	0	0	1	1	0	1	1	1	1	1	1	1	0	1	0	1	1	1	0	0	1
Enterobacter cloacae ECR091	Bacteria	Proteobacteria	Gammaproteobacteria	0	0	0	0	0	0	0	0	0	0	0	0	0	0	0	0	0	0	1	1	0	1	1	1	1	1	1	1	0	1	0	1	1	1	0	0	1
Enterobacter cloacae complex 'Hoffmann cluster III' strain DSM 14563	Bacteria	Proteobacteria	Gammaproteobacteria	0	0	0	0	0	0	0	0	0	0	0	0	0	0	0	0	0	0	1	1	0	1	1	1	1	1	1	1	0	1	0	1	1	1	0	0	1
Enterobacter cloacae complex 'Hoffmann cluster IV' strain DSM 16690	Bacteria	Proteobacteria	Gammaproteobacteria	0	0	0	0	0	1	0	0	0	0	0	0	0	0	0	0	0	0	1	1	0	1	1	1	1	1	1	1	0	1	0	1	1	1	0	0	1
Enterobacter asburiae strain 35734	Bacteria	Proteobacteria	Gammaproteobacteria	0	0	0	0	0	0	0	0	0	0	0	0	0	0	0	0	0	0	1	1	0	1	1	1	1	1	1	1	0	1	0	1	1	1	0	0	1
Enterobacter cloacae subsp. cloacae ATCC 13047 chromosome	Bacteria	Proteobacteria	Gammaproteobacteria	0	0	0	0	0	0	0	0	0	0	0	0	0	0	0	0	0	0	1	1	0	1	1	1	1	1	1	1	0	1	0	1	1	1	0	0	1
Enterobacter cloacae subsp. dissolvens SDM	Bacteria	Proteobacteria	Gammaproteobacteria	0	0	0	0	0	0	0	0	0	0	0	0	0	0	0	0	0	0	1	1	0	1	1	1	1	1	1	1	0	1	0	1	1	1	0	0	1
Enterobacter cloacae EcWSU1	Bacteria	Proteobacteria	Gammaproteobacteria	0	0	0	0	0	0	0	0	0	0	0	0	0	0	0	0	0	0	1	1	0	1	1	1	1	1	1	1	0	1	0	1	1	1	0	0	1
Enterobacter cloacae subsp. cloacae ENHKU01	Bacteria	Proteobacteria	Gammaproteobacteria	0	0	0	0	0	0	0	0	0	0	0	0	0	0	0	0	0	0	1	1	0	1	1	1	1	1	1	1	0	1	0	1	1	1	0	0	1
Enterobacter cloacae P101	Bacteria	Proteobacteria	Gammaproteobacteria	0	0	0	0	0	0	0	0	0	0	0	0	0	0	0	0	0	0	1	1	0	1	1	1	1	1	1	1	0	1	0	1	1	0	0	0	1
Enterobacter cloacae ECNIH2	Bacteria	Proteobacteria	Gammaproteobacteria	0	0	0	0	0	0	0	0	0	0	0	0	0	0	0	0	0	0	1	1	0	1	1	1	1	1	1	1	0	1	0	1	1	1	0	0	1
Enterobacter cloacae strain GGT036	Bacteria	Proteobacteria	Gammaproteobacteria	0	0	0	0	0	0	0	0	0	0	0	0	0	0	0	0	0	0	1	1	0	1	1	1	1	1	1	1	0	1	0	1	1	1	0	0	1
Enterobacter cloacae strain ECNIH4	Bacteria	Proteobacteria	Gammaproteobacteria	0	0	0	0	0	1	0	0	0	0	0	0	0	0	0	0	0	0	1	1	0	1	1	1	1	1	1	1	0	1	0	1	1	1	0	0	1
Enterobacter cloacae strain ECNIH5	Bacteria	Proteobacteria	Gammaproteobacteria	0	0	0	0	0	0	0	0	0	0	0	0	0	0	0	0	0	0	1	1	0	1	1	1	1	1	1	1	0	1	0	1	1	1	0	0	1
Enterobacter cloacae strain CAV1311	Bacteria	Proteobacteria	Gammaproteobacteria	0	0	0	0	0	0	0	0	0	0	0	0	0	0	0	0	0	0	1	1	0	1	1	1	1	1	1	1	0	1	0	1	1	1	0	0	1
Enterobacter cloacae strain CAV1668	Bacteria	Proteobacteria	Gammaproteobacteria	0	0	0	0	0	0	0	0	0	0	0	0	0	0	0	0	0	0	1	1	0	1	1	1	1	1	1	1	0	1	0	1	1	1	0	0	1
Enterobacter cloacae strain CAV1411	Bacteria	Proteobacteria	Gammaproteobacteria	0	0	0	0	0	0	0	0	0	0	0	0	0	0	0	0	0	0	1	1	0	1	1	1	1	1	1	1	0	1	0	1	1	1	0	0	1
Enterobacter cloacae strain CAV1669	Bacteria	Proteobacteria	Gammaproteobacteria	0	0	0	0	0	0	0	0	0	0	0	0	0	0	0	0	0	0	1	1	0	1	1	1	1	1	1	1	0	1	0	1	1	1	0	0	1
Enterobacter cloacae strain UW5	Bacteria	Proteobacteria	Gammaproteobacteria	0	0	0	0	0	0	0	0	0	0	0	0	0	0	0	0	0	0	1	1	0	1	1	1	1	1	1	1	0	1	0	1	1	1	0	0	1
Enterococcus durans strain KLDS6.0933	Bacteria	Firmicutes	Lactobacillales	0	0	0	0	0	0	1	0	0	0	0	0	0	0	0	0	0	0	1	0	0	1	1	1	1	1	0	1	0	1	1	1	0	1	1	0	0
Enterococcus durans strain KLDS 6.0930	Bacteria	Firmicutes	Lactobacillales	0	0	0	0	0	0	1	0	0	0	0	0	0	0	0	0	0	0	1	1	0	1	1	1	1	1	0	1	0	1	1	1	0	1	1	0	0
Enterococcus faecalis V583 chromosome	Bacteria	Firmicutes	Lactobacillales	0	0	0	0	0	0	0	0	0	0	0	0	0	0	0	0	0	0	1	1	0	1	1	1	1	1	0	1	0	1	1	1	0	1	1	0	0
Enterococcus faecalis OG1RF	Bacteria	Firmicutes	Lactobacillales	0	0	0	0	0	0	1	0	0	0	0	0	0	0	0	0	0	0	1	1	0	1	1	1	1	1	0	1	0	1	1	1	0	1	1	0	0
Enterococcus faecalis D32	Bacteria	Firmicutes	Lactobacillales	0	0	0	0	0	0	1	0	0	0	0	0	0	0	0	0	0	0	1	1	0	1	1	1	1	1	0	1	0	1	1	1	0	1	1	0	0
Enterococcus faecalis str. Symbioflor 1	Bacteria	Firmicutes	Lactobacillales	0	0	0	0	0	0	0	0	0	0	0	0	0	0	0	0	0	0	1	1	0	1	1	1	1	1	0	1	0	1	1	1	0	1	1	0	0
Enterococcus faecalis DENG1	Bacteria	Firmicutes	Lactobacillales	0	0	0	0	0	0	0	0	0	0	0	0	0	0	0	0	0	0	1	1	0	1	1	1	1	1	0	1	0	1	1	1	0	1	1	0	0
Enterococcus faecalis ATCC 29212	Bacteria	Firmicutes	Lactobacillales	0	0	0	0	0	0	0	0	0	0	0	0	0	0	0	0	0	0	0	1	0	1	1	1	1	1	0	1	0	1	1	1	0	1	1	0	0
Enterococcus faecalis strain LD33	Bacteria	Firmicutes	Lactobacillales	0	0	0	0	0	0	0	0	0	0	0	0	0	0	0	0	0	0	1	1	0	1	1	1	1	1	0	1	0	1	1	1	0	1	1	0	0
Enterococcus faecalis strain KB1	Bacteria	Firmicutes	Lactobacillales	0	0	0	0	0	0	0	0	0	0	0	0	0	0	0	0	0	0	1	1	0	1	1	1	1	1	0	1	0	1	1	1	0	1	1	0	0
Enterococcus faecium DO chromosome	Bacteria	Firmicutes	Lactobacillales	0	0	0	0	0	0	0	0	0	0	0	0	0	0	0	0	0	0	1	1	0	1	1	1	1	1	0	0	0	1	1	1	0	1	1	0	0
Enterococcus faecium Aus0004	Bacteria	Firmicutes	Lactobacillales	0	0	0	0	0	0	0	0	0	0	0	0	0	0	0	0	0	0	1	1	0	1	1	1	1	1	0	0	0	1	1	1	0	1	1	0	0
Enterococcus faecium NRRL B-2354	Bacteria	Firmicutes	Lactobacillales	0	0	0	0	0	0	0	0	0	0	0	0	0	0	0	0	0	0	1	1	0	1	1	1	1	1	0	0	0	1	1	1	0	1	1	0	0
Enterococcus faecium Aus0085	Bacteria	Firmicutes	Lactobacillales	0	0	0	0	0	0	0	0	0	0	0	0	0	0	0	0	0	0	1	1	0	1	1	1	1	1	0	0	0	1	1	1	0	1	1	0	0
Enterococcus faecium T110	Bacteria	Firmicutes	Lactobacillales	0	0	0	0	0	0	0	0	0	0	0	0	0	0	0	0	0	0	1	1	0	1	1	1	1	1	0	0	0	1	1	1	0	1	1	0	0
Enterococcus faecium strain 64/3	Bacteria	Firmicutes	Lactobacillales	0	0	0	0	0	0	0	0	0	0	0	0	0	0	0	0	0	0	1	1	0	1	1	1	1	1	0	0	0	1	1	1	0	1	1	0	0
Enterococcus faecium strain UW7606x64/3 TC1	Bacteria	Firmicutes	Lactobacillales	0	0	0	0	0	0	0	0	0	0	0	0	0	0	0	0	0	0	1	1	0	1	1	1	1	1	0	0	0	1	1	1	0	1	1	0	0
Enterococcus faecium strain 6E6	Bacteria	Firmicutes	Lactobacillales	0	0	0	0	0	0	0	0	0	0	0	0	0	0	0	0	0	0	1	1	0	1	1	1	1	1	0	0	0	1	1	1	0	1	1	0	0
Enterococcus faecium strain UW8175	Bacteria	Firmicutes	Lactobacillales	0	0	0	0	0	0	0	0	0	0	0	0	0	0	0	0	0	0	1	1	0	1	1	1	1	1	0	0	0	1	1	1	0	1	1	0	0
Enterococcus faecium strain E39	Bacteria	Firmicutes	Lactobacillales	0	0	0	0	0	0	0	0	0	0	0	0	0	0	0	0	0	0	1	1	0	1	1	1	1	1	0	0	0	1	1	1	0	1	1	0	0
Enterococcus faecium strain E745	Bacteria	Firmicutes	Lactobacillales	0	0	0	0	0	0	0	0	0	0	0	0	0	0	0	0	0	0	1	1	0	1	1	1	1	1	0	0	0	1	1	1	0	1	1	0	0
Enterococcus faecium isolate EFE10021 genome assembly	Bacteria	Firmicutes	Lactobacillales	0	0	0	0	0	0	0	0	0	0	0	0	0	0	0	0	0	0	1	1	0	1	1	1	1	1	0	0	0	1	1	1	0	1	1	0	0
Enterococcus gallinarum strain FDAARGOS_163	Bacteria	Firmicutes	Lactobacillales	0	0	0	0	0	0	0	0	0	0	0	0	0	0	0	0	0	0	1	1	0	1	1	1	1	1	0	1	0	1	1	1	0	1	1	0	0
Enterococcus hirae ATCC 9790	Bacteria	Firmicutes	Lactobacillales	0	0	0	0	0	0	1	0	0	0	0	0	0	0	0	0	0	0	1	0	0	1	1	1	1	1	0	0	1	1	1	1	0	1	1	0	0
Enterococcus hirae strain R17	Bacteria	Firmicutes	Lactobacillales	0	0	0	0	0	0	1	0	0	0	0	0	0	0	0	0	0	0	1	1	0	1	1	1	1	1	0	1	0	1	1	1	0	1	1	0	0
Enterobacter hormaechei subsp. oharae strain 34978	Bacteria	Proteobacteria	Gammaproteobacteria	0	0	0	0	0	0	0	0	0	0	0	0	0	0	0	0	0	0	1	1	0	1	1	1	1	1	1	1	0	1	0	1	1	1	0	0	1
Enterobacter cloacae strain 34998	Bacteria	Proteobacteria	Gammaproteobacteria	0	0	0	0	0	0	0	0	0	0	0	0	0	0	0	0	0	0	1	1	0	1	1	1	1	1	1	1	0	1	0	1	1	1	0	0	1
Enterobacter hormaechei subsp. steigerwaltii strain 34977	Bacteria	Proteobacteria	Gammaproteobacteria	0	0	0	0	0	0	0	0	0	0	0	0	0	0	0	0	0	0	1	1	0	1	1	1	1	1	1	1	0	1	0	1	1	1	0	0	1
Enterobacter cloacae strain 34983	Bacteria	Proteobacteria	Gammaproteobacteria	0	0	0	0	0	0	0	0	0	0	0	0	0	0	0	0	0	0	1	1	0	1	1	1	1	1	1	1	0	1	0	1	1	1	0	0	1
Enterobacter cloacae strain 34399	Bacteria	Proteobacteria	Gammaproteobacteria	0	0	0	0	0	0	0	0	0	0	0	0	0	0	0	0	0	0	1	1	0	1	1	1	1	1	1	1	0	1	0	1	1	1	0	0	1
Enterobacter hormaechei subsp. oharae strain DSM 16687	Bacteria	Proteobacteria	Gammaproteobacteria	0	0	0	0	0	1	0	0	0	0	0	0	0	0	0	0	0	0	1	1	0	1	1	1	1	1	1	1	0	1	0	1	1	1	0	0	1
Enterobacter hormaechei subsp. steigerwaltii strain DSM 16691	Bacteria	Proteobacteria	Gammaproteobacteria	0	0	0	0	0	0	0	0	0	0	0	0	0	0	0	0	0	0	1	1	0	1	1	1	1	1	1	1	0	1	0	1	1	1	0	0	1
Enterobacter kobei strain DSM 13645	Bacteria	Proteobacteria	Gammaproteobacteria	0	0	0	0	0	0	0	0	0	0	0	0	0	0	0	0	0	0	1	1	0	1	1	1	1	1	1	1	0	1	0	1	1	1	0	0	1
Enterobacter lignolyticus SCF1	Bacteria	Proteobacteria	Gammaproteobacteria	0	0	0	0	0	0	0	0	0	0	0	0	0	0	0	0	0	0	1	1	0	1	1	1	1	1	1	1	0	1	0	1	1	1	0	0	1
Enterobacter ludwigii strain EN-119	Bacteria	Proteobacteria	Gammaproteobacteria	0	0	0	0	0	0	0	0	0	0	0	0	0	0	0	0	0	0	1	1	0	1	1	1	1	1	1	1	0	1	0	1	1	1	0	0	1
Enterococcus mundtii QU 25 DNA	Bacteria	Firmicutes	Lactobacillales	0	0	0	0	0	0	1	0	0	0	0	0	0	0	0	0	0	0	1	1	0	1	1	1	1	0	0	0	0	1	1	1	0	1	1	0	0
Endosymbiont of Bathymodiolus septemdierum str. Myojin knoll DNA	Bacteria	Proteobacteria	Gammaproteobacteria	0	0	0	0	0	0	0	0	1	0	0	0	0	0	0	0	0	0	1	1	0	1	1	1	1	1	1	0	0	0	0	1	1	1	1	0	0
Endosymbiont of unidentified scaly snail isolate Monju DNA	Bacteria	Proteobacteria	Gammaproteobacteria	0	0	1	0	0	0	0	0	0	0	0	0	0	0	0	0	0	0	1	1	0	1	1	1	1	1	1	0	0	1	0	1	1	1	1	0	0
Endosymbiont of Llaveia axin axin	Bacteria	Bacteroidetes	Flavobacteriia	0	0	0	0	0	0	0	0	0	0	0	0	0	0	0	0	0	0	0	0	0	0	0	0	0	0	0	0	0	0	0	0	0	0	0	0	0
Endosymbiont of Acanthamoeba sp. UWC8	Bacteria	Proteobacteria	Alphaproteobacteria	0	0	0	0	0	0	0	0	0	0	0	0	0	0	0	0	0	0	1	0	0	1	1	1	0	0	0	0	0	1	0	1	1	1	0	0	0
Endomicrobium proavitum strain Rsa215	Bacteria	Elusimicrobia	Endomicrobia	0	0	1	0	0	0	0	0	1	0	0	0	0	0	0	0	0	0	1	0	0	1	1	1	1	1	0	0	0	1	0	1	0	1	1	0	0
Enterobacter sp. R4-368	Bacteria	Proteobacteria	Gammaproteobacteria	0	0	0	0	0	0	0	0	0	0	0	0	0	0	0	0	0	0	1	1	0	1	1	1	1	1	1	1	0	1	0	1	1	1	0	0	1
Enterobacter sp. E20	Bacteria	Proteobacteria	Gammaproteobacteria	0	0	0	0	0	0	0	0	0	0	0	0	0	0	0	0	0	0	1	1	0	1	1	1	1	1	1	1	0	1	0	1	1	1	0	0	1
Enterobacter sp. FY-07	Bacteria	Proteobacteria	Gammaproteobacteria	0	0	0	0	0	0	0	0	0	0	0	0	0	0	0	0	0	0	1	1	0	1	1	1	1	1	1	1	0	1	0	1	1	1	0	0	1
Enterobacter sp. ODB01	Bacteria	Proteobacteria	Gammaproteobacteria	0	0	0	0	0	0	0	0	0	0	0	0	0	0	0	0	0	0	1	1	0	1	1	1	1	1	1	1	0	1	0	1	1	1	0	0	1
Enterobacter sp. HK169	Bacteria	Proteobacteria	Gammaproteobacteria	0	0	0	0	0	0	0	0	0	0	0	0	0	0	0	0	0	0	1	1	0	1	1	1	1	1	1	1	0	1	0	1	1	1	0	0	1
Enterobacter sp. 638	Bacteria	Proteobacteria	Gammaproteobacteria	0	0	0	0	0	1	0	0	0	0	0	0	0	0	0	0	0	0	1	1	0	1	1	1	1	1	1	1	0	1	0	1	1	1	0	0	1
Enterobacter xiangfangensis strain LMG27195	Bacteria	Proteobacteria	Gammaproteobacteria	0	0	0	0	0	0	0	0	0	0	0	0	0	0	0	0	0	0	1	1	0	1	1	1	1	1	1	1	0	1	0	1	1	1	0	0	1
Erwinia amylovora ATCC 49946 chromosomal sequence.	Bacteria	Proteobacteria	Gammaproteobacteria	0	0	0	0	1	0	0	0	0	0	0	0	0	0	0	0	0	0	1	1	0	1	1	1	1	1	1	1	0	1	0	1	1	1	0	0	1
Erwinia amylovora CFBP1430 complete genome.	Bacteria	Proteobacteria	Gammaproteobacteria	0	0	0	0	1	0	0	0	0	0	0	0	0	0	0	0	0	0	1	1	0	1	1	1	1	1	1	1	0	1	0	1	1	1	0	0	1
Erythrobacter atlanticus strain s21-N3	Bacteria	Proteobacteria	Alphaproteobacteria	0	0	0	0	0	0	0	0	0	0	0	0	0	0	0	0	0	1	1	0	0	1	1	1	1	1	0	0	0	1	0	1	1	1	1	0	0
Erysipelotrichaceae bacterium I46	Bacteria	Firmicutes	Erysipelotrichia	0	0	1	0	0	0	0	0	0	0	0	0	0	0	0	0	0	1	1	1	0	1	1	1	1	1	0	0	0	1	1	1	0	1	1	0	0
Erwinia billingiae strain Eb661 complete chromosome.	Bacteria	Proteobacteria	Gammaproteobacteria	0	0	0	0	0	0	0	0	0	0	0	0	0	0	0	0	0	0	1	1	0	1	1	1	1	1	1	1	0	1	0	1	1	1	0	0	1
Erwinia sp. EM595 genome assembly EM595	Bacteria	Proteobacteria	Gammaproteobacteria	0	0	0	0	0	0	0	0	0	0	0	0	0	0	0	0	0	0	1	1	0	1	1	1	1	1	1	1	0	1	0	1	1	1	0	0	1
Erythrobacter litoralis HTCC2594	Bacteria	Proteobacteria	Alphaproteobacteria	0	0	0	0	0	0	0	0	0	0	0	0	0	0	0	0	0	1	1	0	0	1	1	1	1	1	0	0	0	1	0	1	1	1	1	0	0
Erythrobacter litoralis strain DSM 8509	Bacteria	Proteobacteria	Alphaproteobacteria	0	0	0	0	0	0	0	0	0	0	0	0	0	0	0	0	0	1	1	0	0	1	1	1	1	1	0	0	0	1	0	1	1	1	1	0	0
Erwinia pyrifoliae strain Ep1/96 complete chromosome.	Bacteria	Proteobacteria	Gammaproteobacteria	0	0	0	0	1	1	0	0	0	0	0	0	0	0	0	0	0	0	1	1	0	1	1	1	1	1	1	1	0	1	0	1	1	1	0	0	1
Erysipelothrix rhusiopathiae str. Fujisawa DNA	Bacteria	Firmicutes	Erysipelotrichia	0	0	0	0	0	0	0	0	0	0	0	0	0	0	0	0	0	0	1	1	0	1	0	1	1	1	0	0	0	0	1	1	0	1	0	0	0
Erysipelothrix rhusiopathiae SY1027	Bacteria	Firmicutes	Erysipelotrichia	0	0	0	0	0	0	0	0	0	0	0	0	0	0	0	0	0	0	1	1	0	1	0	1	0	1	0	0	0	0	1	1	0	0	0	0	0
Erysipelothrix rhusiopathiae strain GXBY-1	Bacteria	Firmicutes	Erysipelotrichia	0	0	0	0	0	0	0	0	0	0	0	0	0	0	0	0	0	0	1	1	0	1	0	1	1	1	0	0	0	0	1	1	0	1	0	0	0
Erysipelothrix rhusiopathiae strain WH13013	Bacteria	Firmicutes	Erysipelotrichia	0	0	0	0	0	0	0	0	0	0	0	0	0	0	0	0	0	0	1	1	0	1	0	1	1	1	0	0	0	0	1	1	0	1	0	0	0
Erysipelothrix sp. LV19	Bacteria	Firmicutes	Erysipelotrichia	0	0	0	0	0	0	0	0	0	0	0	0	0	0	0	0	0	0	1	1	0	1	0	1	1	1	0	1	0	0	1	1	0	1	0	0	0
Erwinia sp. Ejp617	Bacteria	Proteobacteria	Gammaproteobacteria	0	0	0	0	1	0	0	0	0	0	0	0	0	0	0	0	0	0	1	1	0	1	1	1	1	1	1	1	0	1	0	1	1	1	0	0	1
Erwinia tasmaniensis strain ET1/99 complete chromosome.	Bacteria	Proteobacteria	Gammaproteobacteria	0	0	0	0	0	1	0	0	0	0	0	0	0	0	0	0	0	0	1	1	0	1	1	1	1	1	1	1	0	1	0	1	1	1	0	0	1
Escherichia albertii KF1	Bacteria	Proteobacteria	Gammaproteobacteria	0	0	0	0	0	0	0	0	0	0	0	0	0	0	0	0	0	0	1	1	0	1	1	1	1	1	1	1	0	1	0	1	1	1	0	0	1
Escherichia albertii DNA	Bacteria	Proteobacteria	Gammaproteobacteria	0	0	0	0	0	0	0	0	0	0	0	0	0	0	0	0	0	0	1	1	0	1	1	1	1	1	1	1	0	1	0	1	1	1	0	0	1
Escherichia coli str. K-12 substr. MG1655	Bacteria	Proteobacteria	Gammaproteobacteria	0	0	0	0	1	0	0	0	0	0	0	0	0	0	0	0	0	0	1	1	0	1	1	1	1	1	1	1	0	1	0	1	1	1	0	0	1
Escherichia coli CFT073	Bacteria	Proteobacteria	Gammaproteobacteria	0	0	0	0	0	0	0	0	0	0	0	0	0	0	0	0	0	0	1	1	0	1	1	1	1	1	1	1	0	1	0	1	1	1	0	0	1
Escherichia coli O157:H7 str. Sakai chromosome	Bacteria	Proteobacteria	Gammaproteobacteria	0	0	0	0	1	0	0	0	0	0	0	0	0	0	0	0	0	0	1	1	0	1	1	1	1	1	1	1	0	1	0	1	1	1	0	0	1
Escherichia coli BL21(DE3)	Bacteria	Proteobacteria	Gammaproteobacteria	0	0	0	0	0	0	0	0	0	0	0	0	0	0	0	0	0	0	1	1	0	1	1	1	1	1	1	1	0	1	0	1	1	1	0	0	1
Escherichia coli str. K-12 substr. W3110 DNA	Bacteria	Proteobacteria	Gammaproteobacteria	0	0	0	0	1	0	0	0	0	0	0	0	0	0	0	0	0	0	1	1	0	1	1	1	1	1	1	1	0	1	0	1	1	1	0	0	1
Escherichia coli SE11 DNA	Bacteria	Proteobacteria	Gammaproteobacteria	0	0	0	0	1	0	0	0	0	0	0	0	0	0	0	0	0	0	1	1	0	1	1	1	1	1	1	1	0	1	0	1	1	1	0	0	1
Escherichia coli SE15 DNA	Bacteria	Proteobacteria	Gammaproteobacteria	0	0	0	0	0	0	0	0	0	0	0	0	0	0	0	0	0	0	1	1	0	1	1	1	1	1	1	1	0	1	0	1	1	1	0	0	1
Escherichia coli O103:H2 str. 12009 DNA	Bacteria	Proteobacteria	Gammaproteobacteria	0	0	0	0	1	0	0	0	0	0	0	0	0	0	0	0	0	0	1	1	0	1	1	1	1	1	1	1	0	1	0	1	1	1	0	0	1
Escherichia coli O111:H- str. 11128 DNA	Bacteria	Proteobacteria	Gammaproteobacteria	0	0	0	0	1	0	0	0	0	0	0	0	0	0	0	0	0	0	1	1	0	1	1	1	1	1	1	1	0	1	0	1	1	1	0	0	1
Escherichia coli UTI89	Bacteria	Proteobacteria	Gammaproteobacteria	0	0	0	0	0	1	0	0	0	0	0	0	0	0	0	0	0	0	1	1	0	1	1	1	1	1	1	1	0	1	0	1	1	1	0	0	1
Escherichia coli 536	Bacteria	Proteobacteria	Gammaproteobacteria	0	0	0	0	0	0	0	0	0	0	0	0	0	0	0	0	0	0	1	1	0	1	1	1	1	1	1	1	0	1	0	1	1	1	0	0	1
Escherichia coli APEC O1	Bacteria	Proteobacteria	Gammaproteobacteria	0	0	0	0	0	1	0	0	0	0	0	0	0	0	0	0	0	0	1	1	0	1	1	1	1	1	1	1	0	1	0	1	1	1	0	0	1
Escherichia coli E24377A	Bacteria	Proteobacteria	Gammaproteobacteria	0	0	0	0	1	0	0	0	0	0	0	0	0	0	0	0	0	0	1	1	0	1	1	1	1	1	1	1	0	1	0	1	1	1	0	0	1
Escherichia coli HS	Bacteria	Proteobacteria	Gammaproteobacteria	0	0	0	0	1	0	0	0	0	0	0	0	0	0	0	0	0	0	1	1	0	1	1	1	1	1	1	1	0	1	0	1	1	1	0	0	1
Escherichia coli B str. REL606	Bacteria	Proteobacteria	Gammaproteobacteria	0	0	0	0	0	0	0	0	0	0	0	0	0	0	0	0	0	0	1	1	0	1	1	1	1	1	1	1	0	1	0	1	1	1	0	0	1
Escherichia coli ATCC 8739	Bacteria	Proteobacteria	Gammaproteobacteria	0	0	0	0	1	0	0	0	0	0	0	0	0	0	0	0	0	0	1	1	0	1	1	1	1	1	1	1	0	1	0	1	1	1	0	0	1
Escherichia coli str. K12 substr. DH10B	Bacteria	Proteobacteria	Gammaproteobacteria	0	0	0	0	1	0	0	0	0	0	0	0	0	0	0	0	0	0	1	1	0	1	1	1	1	1	1	1	0	1	0	1	1	1	0	0	1
Escherichia coli SMS-3-5	Bacteria	Proteobacteria	Gammaproteobacteria	0	0	0	0	1	0	0	0	0	0	0	0	0	0	0	0	0	0	1	1	0	1	1	1	1	1	1	1	0	1	0	1	1	1	0	0	1
Escherichia coli O157:H7 str. EC4115	Bacteria	Proteobacteria	Gammaproteobacteria	0	0	0	0	1	0	0	0	0	0	0	0	0	0	0	0	0	0	1	1	0	1	1	1	1	1	1	1	0	1	0	1	1	1	0	0	1
Escherichia coli O157:H7 str. TW14359	Bacteria	Proteobacteria	Gammaproteobacteria	0	0	0	0	1	0	0	0	0	0	0	0	0	0	0	0	0	0	1	1	0	1	1	1	1	1	1	1	0	1	0	1	1	1	0	0	1
Escherichia coli BW2952	Bacteria	Proteobacteria	Gammaproteobacteria	0	0	0	0	1	0	0	0	0	0	0	0	0	0	0	0	0	0	1	1	0	1	1	1	1	1	1	1	0	1	0	1	1	1	0	0	1
Escherichia coli BL21(DE3)	Bacteria	Proteobacteria	Gammaproteobacteria	0	0	0	0	0	0	0	0	0	0	0	0	0	0	0	0	0	0	1	1	0	1	1	1	1	1	1	1	0	1	0	1	1	1	0	0	1
Escherichia coli DH1	Bacteria	Proteobacteria	Gammaproteobacteria	0	0	0	0	1	0	0	0	0	0	0	0	0	0	0	0	0	0	1	1	0	1	1	1	1	1	1	1	0	1	0	1	1	1	0	0	1
Escherichia coli 'BL21-Gold(DE3)pLysS AG'	Bacteria	Proteobacteria	Gammaproteobacteria	0	0	0	0	0	0	0	0	0	0	0	0	0	0	0	0	0	0	1	1	0	1	1	1	1	1	1	1	0	1	0	1	1	1	0	0	1
Escherichia coli O55:H7 str. CB9615	Bacteria	Proteobacteria	Gammaproteobacteria	0	0	0	0	1	0	0	0	0	0	0	0	0	0	0	0	0	0	1	1	0	1	1	1	1	1	1	1	0	1	0	1	1	1	0	0	1
Escherichia coli IHE3034	Bacteria	Proteobacteria	Gammaproteobacteria	0	0	0	0	0	1	0	0	0	0	0	0	0	0	0	0	0	0	1	1	0	1	1	1	1	1	1	1	0	1	0	1	1	1	0	0	1
Escherichia coli 55989 chromosome	Bacteria	Proteobacteria	Gammaproteobacteria	0	0	0	0	1	0	0	0	0	0	0	0	0	0	0	0	0	0	1	1	0	1	1	1	1	1	1	1	0	1	0	1	1	1	0	0	1
Escherichia coli IAI1 chromosome	Bacteria	Proteobacteria	Gammaproteobacteria	0	0	0	0	1	0	0	0	0	0	0	0	0	0	0	0	0	0	1	1	0	1	1	1	1	1	1	1	0	1	0	1	1	1	0	0	1
Escherichia coli IAI39 chromosome	Bacteria	Proteobacteria	Gammaproteobacteria	0	0	0	0	0	0	0	0	0	0	0	0	0	0	0	0	0	0	1	1	0	1	1	1	1	1	1	1	0	1	0	1	1	1	0	0	1
Escherichia coli 0127:H6 E2348/69 complete genome	Bacteria	Proteobacteria	Gammaproteobacteria	0	0	0	0	0	0	0	0	0	0	0	0	0	0	0	0	0	0	1	1	0	1	1	1	1	1	1	1	0	1	0	1	1	1	0	0	1
Escherichia coli 042 complete genome.	Bacteria	Proteobacteria	Gammaproteobacteria	0	0	0	0	1	0	0	0	0	0	0	0	0	0	0	0	0	0	1	1	0	1	1	1	1	1	1	1	0	1	0	1	1	1	0	0	1
Escherichia coli O26:H11 str. 11368 DNA	Bacteria	Proteobacteria	Gammaproteobacteria	0	0	0	0	1	0	0	0	0	0	0	0	0	0	0	0	0	0	1	1	0	1	1	1	1	1	1	1	0	1	0	1	1	1	0	0	1
[truncated: 3,777 more rows]
